# Supplementary material
Source: publisher figshare collection journal article supplement (https://acs.figshare.com/ndownloader/files/3617790)
Supplement: Supplementary file 1 [file 3617790]

## Sheet: proteinGroups
Supplemental table 1. Complete spectra search output. Unprocessed MaxQuant output. ND1-3, whole lysate normal diet; NDM1-3, membrane fraction normal diet; HFD1-3, whole lysate high fat diet; HFDM1-3 membrane fraction high fat diet.
Protein IDs	Majority protein IDs	Protein names	Gene names	Fasta headers	Proteins	Peptides	Razor + unique peptides	Unique peptides	Peptides ND1	Peptides ND2	Peptides ND3	Peptides NDM1	Peptides NDM3	Peptides NDM3	Peptides HFD1	Peptides HFD2	Peptides HFD3	Peptides HFDM1	Peptides HFDM2	Peptides HFDM3	Razor + unique peptides ND1	Razor + unique peptides ND2	Razor + unique peptides ND3	Razor + unique peptides NDM1	Razor + unique peptides NDM3	Razor + unique peptides NDM3	Razor + unique peptides HFD1	Razor + unique peptides HFD2	Razor + unique peptides HFD3	Razor + unique peptides HFDM1	Razor + unique peptides HFDM2	Razor + unique peptides HFDM3	Unique peptides ND1	Unique peptides ND2	Unique peptides ND3	Unique peptides NDM1	Unique peptides NDM3	Unique peptides NDM3	Unique peptides HFD1	Unique peptides HFD2	Unique peptides HFD3	Unique peptides HFDM1	Unique peptides HFDM2	Unique peptides HFDM3	Sequence coverage [%]	Unique + razor sequence coverage [%]	Unique sequence coverage [%]	Mol. weight [kDa]	Sequence length
A0ELI5;Q8K2D3	A0ELI5;Q8K2D3	Enhancer of mRNA-decapping protein 3	Edc3	>tr|A0ELI5|A0ELI5_MOUSE Putative uncharacterized protein OS=Mus musculus GN=Edc3 PE=4 SV=1;>sp|Q8K2D3|EDC3_MOUSE Enhancer of mRNA-decapping protein 3 OS=Mus musculus GN=Edc3 PE=2 SV=1	2	2	2	2	0	0	2	0	1	0	1	2	1	0	0	0	0	0	2	0	1	0	1	2	1	0	0	0	0	0	2	0	1	0	1	2	1	0	0	0	5.1	5.1	5.1	55.957	508
A0JNY3;Q8BUV3	A0JNY3;Q8BUV3	Gephyrin;Molybdopterin adenylyltransferase;Molybdopterin molybdenumtransferase	Gphn	>tr|A0JNY3|A0JNY3_MOUSE Gephyrin OS=Mus musculus GN=Gphn PE=2 SV=1;>sp|Q8BUV3|GEPH_MOUSE Gephyrin OS=Mus musculus GN=Gphn PE=1 SV=2	2	19	19	19	14	13	13	10	7	8	13	16	14	6	11	11	14	13	13	10	7	8	13	16	14	6	11	11	14	13	13	10	7	8	13	16	14	6	11	11	34.2	34.2	34.2	83.665	772
A0MNP4;Q9ERF3;Q8BVQ0;F6U7Z8	A0MNP4;Q9ERF3;Q8BVQ0;F6U7Z8	WD repeat-containing protein 61	Wdr61	>tr|A0MNP4|A0MNP4_MOUSE CDW13/WDR61 OS=Mus musculus GN=Wdr61 PE=2 SV=1;>sp|Q9ERF3|WDR61_MOUSE WD repeat-containing protein 61 OS=Mus musculus GN=Wdr61 PE=2 SV=1;>tr|Q8BVQ0|Q8BVQ0_MOUSE WD repeat-containing protein 61 OS=Mus musculus GN=Wdr61 PE=2 SV=1;>tr|	4	9	9	9	7	8	7	1	1	1	7	8	6	3	2	2	7	8	7	1	1	1	7	8	6	3	2	2	7	8	7	1	1	1	7	8	6	3	2	2	43.9	43.9	43.9	33.772	305
A0PJK7;E9QNS2;Q8VHF2	A0PJK7;E9QNS2;Q8VHF2	Cadherin-related family member 5	Cdhr5	>tr|A0PJK7|A0PJK7_MOUSE Cadherin-related family member 5 OS=Mus musculus GN=Cdhr5 PE=2 SV=1;>tr|E9QNS2|E9QNS2_MOUSE Cadherin-related family member 5 OS=Mus musculus GN=Cdhr5 PE=4 SV=1;>sp|Q8VHF2|CDHR5_MOUSE Cadherin-related family member 5 OS=Mus musculus	3	21	21	4	14	12	14	17	19	18	16	14	13	21	17	20	14	12	14	17	19	18	16	14	13	21	17	20	2	2	2	1	3	2	3	2	3	4	2	3	36.5	36.5	9.3	88.226	831
A0PK78;Q78PG9	A0PK78;Q78PG9	Coiled-coil domain-containing protein 25	Ccdc25	>tr|A0PK78|A0PK78_MOUSE Coiled-coil domain containing 25 OS=Mus musculus GN=Ccdc25 PE=2 SV=1;>sp|Q78PG9|CCD25_MOUSE Coiled-coil domain-containing protein 25 OS=Mus musculus GN=Ccdc25 PE=1 SV=1	2	11	11	11	7	7	8	2	1	1	9	7	7	0	1	2	7	7	8	2	1	1	9	7	7	0	1	2	7	7	8	2	1	1	9	7	7	0	1	2	52.4	52.4	52.4	24.48	208
A1A4T2;Q8BHN3-2;Q8BHN3-3	A1A4T2;Q8BHN3-2;Q8BHN3-3		Ganab	>tr|A1A4T2|A1A4T2_MOUSE Alpha glucosidase 2 alpha neutral subunit OS=Mus musculus GN=Ganab PE=2 SV=1;>sp|Q8BHN3-2|GANAB_MOUSE Isoform 2 of Neutral alpha-glucosidase AB OS=Mus musculus GN=Ganab;>sp|Q8BHN3-3|GANAB_MOUSE Isoform 3 of Neutral alpha-glucosidase	3	48	48	3	36	34	41	37	31	31	43	42	44	41	42	42	36	34	41	37	31	31	43	42	44	41	42	42	2	2	1	1	1	1	3	2	2	1	2	2	60.7	60.7	4.8	109.4	966
A1BN54;O88990;D3YY95	A1BN54		Actn1	>tr|A1BN54|A1BN54_MOUSE Alpha actinin 1a OS=Mus musculus GN=Actn1 PE=2 SV=1	3	52	32	1	40	43	44	36	30	35	44	43	46	38	38	40	25	25	26	19	13	19	26	25	27	22	21	22	1	1	1	0	0	0	1	1	1	0	0	0	66.1	46.3	1.1	102.72	887
A1BQX3;Q3UZP0;A1BQX5;E9Q1T5	A1BQX3;Q3UZP0;A1BQX5	MARVEL domain-containing protein 2	Marveld2	>tr|A1BQX3|A1BQX3_MOUSE Tricellulin isoform a OS=Mus musculus GN=Marveld2 PE=2 SV=1;>sp|Q3UZP0|MALD2_MOUSE MARVEL domain-containing protein 2 OS=Mus musculus GN=Marveld2 PE=1 SV=1;>tr|A1BQX5|A1BQX5_MOUSE MARVEL domain-containing protein 2 OS=Mus musculus G	4	7	7	7	1	2	2	5	5	5	1	2	2	5	5	5	1	2	2	5	5	5	1	2	2	5	5	5	1	2	2	5	5	5	1	2	2	5	5	5	14.4	14.4	14.4	63.662	555
A1ILG8;Q8BX70;E9QLN1;Q8BX70-3;Q8BX70-2;A1ILH0;A1ILH1	A1ILG8;Q8BX70;E9QLN1;Q8BX70-3;Q8BX70-2	Vacuolar protein sorting-associated protein 13C	Vps13c	>tr|A1ILG8|A1ILG8_MOUSE Chorein OS=Mus musculus GN=Vps13c PE=2 SV=1;>sp|Q8BX70|VP13C_MOUSE Vacuolar protein sorting-associated protein 13C OS=Mus musculus GN=Vps13c PE=1 SV=2;>tr|E9QLN1|E9QLN1_MOUSE Vacuolar protein sorting-associated protein 13C OS=Mus mu	7	17	17	17	9	8	10	4	5	7	9	11	10	4	6	7	9	8	10	4	5	7	9	11	10	4	6	7	9	8	10	4	5	7	9	11	10	4	6	7	6.4	6.4	6.4	420.08	3748
A1L013;Q9CS00	A1L013;Q9CS00	Uncharacterized protein C19orf29 homolog	2510012J08Rik	>tr|A1L013|A1L013_MOUSE Cactin OS=Mus musculus GN=2510012J08Rik PE=2 SV=1;>sp|Q9CS00|CS029_MOUSE Uncharacterized protein C19orf29 homolog OS=Mus musculus PE=1 SV=2	2	4	4	4	1	1	2	0	0	0	0	2	2	0	0	0	1	1	2	0	0	0	0	2	2	0	0	0	1	1	2	0	0	0	0	2	2	0	0	0	8.4	8.4	8.4	90.66	772
A1L329;P97432;A2A4N7;A2A4N8;A2A4N5;Q05BC8;F6S397	A1L329;P97432;A2A4N7;A2A4N8;A2A4N5;Q05BC8;F6S397	Next to BRCA1 gene 1 protein	Nbr1	>tr|A1L329|A1L329_MOUSE Neighbor of Brca1 gene 1 OS=Mus musculus GN=Nbr1 PE=2 SV=1;>sp|P97432|NBR1_MOUSE Next to BRCA1 gene 1 protein OS=Mus musculus GN=Nbr1 PE=1 SV=1;>tr|A2A4N7|A2A4N7_MOUSE Neighbor of Brca1 gene 1 OS=Mus musculus GN=Nbr1 PE=4 SV=1;>tr|A	7	2	2	2	2	2	2	2	2	2	2	2	2	2	2	2	2	2	2	2	2	2	2	2	2	2	2	2	2	2	2	2	2	2	2	2	2	2	2	2	3.1	3.1	3.1	109.96	988
A1L347;P16627	A1L347;P16627	Heat shock 70 kDa protein 1-like	Hspa1l	>tr|A1L347|A1L347_MOUSE Heat shock protein 1-like OS=Mus musculus GN=Hspa1l PE=2 SV=1;>sp|P16627|HS71L_MOUSE Heat shock 70 kDa protein 1-like OS=Mus musculus GN=Hspa1l PE=2 SV=4	2	15	2	2	14	14	14	10	8	11	14	13	15	12	12	12	2	2	2	2	1	2	2	2	2	2	2	2	2	2	2	2	1	2	2	2	2	2	2	2	28.1	4.7	4.7	70.636	641
A1L353;P82198;Q3UXJ2	A1L353;P82198;Q3UXJ2	Transforming growth factor-beta-induced protein ig-h3	Tgfbi	>tr|A1L353|A1L353_MOUSE Transforming growth factor, beta induced OS=Mus musculus GN=Tgfbi PE=2 SV=1;>sp|P82198|BGH3_MOUSE Transforming growth factor-beta-induced protein ig-h3 OS=Mus musculus GN=Tgfbi PE=2 SV=1;>tr|Q3UXJ2|Q3UXJ2_MOUSE Transforming growth f	3	13	13	13	10	8	12	7	4	5	9	9	11	7	8	8	10	8	12	7	4	5	9	9	11	7	8	8	10	8	12	7	4	5	9	9	11	7	8	8	25.5	25.5	25.5	74.596	683
A1L361;Q9WUN2	A1L361;Q9WUN2	Serine/threonine-protein kinase TBK1	Tbk1	>tr|A1L361|A1L361_MOUSE TANK-binding kinase 1 OS=Mus musculus GN=Tbk1 PE=2 SV=1;>sp|Q9WUN2|TBK1_MOUSE Serine/threonine-protein kinase TBK1 OS=Mus musculus GN=Tbk1 PE=1 SV=1	2	15	15	15	8	10	10	2	3	4	8	7	9	3	4	2	8	10	10	2	3	4	8	7	9	3	4	2	8	10	10	2	3	4	8	7	9	3	4	2	30	30	30	83.424	729
A1L3B8;P26516	A1L3B8;P26516	26S proteasome non-ATPase regulatory subunit 7	Psmd7	>tr|A1L3B8|A1L3B8_MOUSE Proteasome (Prosome, macropain) 26S subunit, non-ATPase, 7 OS=Mus musculus GN=Psmd7 PE=2 SV=1;>sp|P26516|PSD7_MOUSE 26S proteasome non-ATPase regulatory subunit 7 OS=Mus musculus GN=Psmd7 PE=1 SV=2	2	14	14	14	12	12	12	5	5	6	12	12	13	9	11	11	12	12	12	5	5	6	12	12	13	9	11	11	12	12	12	5	5	6	12	12	13	9	11	11	62.6	62.6	62.6	36.539	321
A1L3P4;E9QAX8;B0QZV3	A1L3P4;E9QAX8;B0QZV3	Sodium/hydrogen exchanger	Slc9a6	>tr|A1L3P4|A1L3P4_MOUSE Sodium/hydrogen exchanger OS=Mus musculus GN=Slc9a6 PE=2 SV=1;>tr|E9QAX8|E9QAX8_MOUSE Sodium/hydrogen exchanger OS=Mus musculus GN=Slc9a6 PE=3 SV=1;>tr|B0QZV3|B0QZV3_MOUSE Sodium/hydrogen exchanger OS=Mus musculus GN=Slc9a6 PE=3 SV=	3	10	10	9	5	4	7	6	5	4	6	6	8	6	7	6	5	4	7	6	5	4	6	6	8	6	7	6	5	4	7	5	4	3	6	6	8	5	6	6	20.8	20.8	18.1	77.952	702
A2A3Z8;Q05186	A2A3Z8;Q05186	Reticulocalbin-1	Rcn1	>tr|A2A3Z8|A2A3Z8_MOUSE Reticulocalbin 1 OS=Mus musculus GN=Rcn1 PE=4 SV=1;>sp|Q05186|RCN1_MOUSE Reticulocalbin-1 OS=Mus musculus GN=Rcn1 PE=1 SV=1	2	4	4	4	3	3	4	2	2	1	4	3	3	0	1	0	3	3	4	2	2	1	4	3	3	0	1	0	3	3	4	2	2	1	4	3	3	0	1	0	14.2	14.2	14.2	38.113	325
A2A417;O09030;E9PWZ0	A2A417;O09030;E9PWZ0	Interleukin-13 receptor subunit alpha-1	Il13ra1	>tr|A2A417|A2A417_MOUSE Interleukin 13 receptor, alpha 1 OS=Mus musculus GN=Il13ra1 PE=4 SV=1;>sp|O09030|I13R1_MOUSE Interleukin-13 receptor subunit alpha-1 OS=Mus musculus GN=Il13ra1 PE=2 SV=1;>tr|E9PWZ0|E9PWZ0_MOUSE Interleukin-13 receptor subunit alpha-	3	12	12	12	3	6	6	9	10	8	5	8	5	10	10	10	3	6	6	9	10	8	5	8	5	10	10	10	3	6	6	9	10	8	5	8	5	10	10	10	37.3	37.3	37.3	48.402	424
A2A432;A2A432-2;E9PXY1	A2A432;A2A432-2;E9PXY1	Cullin-4B	Cul4b	>sp|A2A432|CUL4B_MOUSE Cullin-4B OS=Mus musculus GN=Cul4b PE=1 SV=1;>sp|A2A432-2|CUL4B_MOUSE Isoform 2 of Cullin-4B OS=Mus musculus GN=Cul4b;>tr|E9PXY1|E9PXY1_MOUSE Cullin-4B OS=Mus musculus GN=Cul4b PE=3 SV=1	3	15	7	7	4	8	9	1	3	1	9	10	11	3	5	3	1	4	4	0	2	0	3	4	4	1	2	1	1	4	4	0	2	0	3	4	4	1	2	1	17.5	9	9	110.7	970
A2A443;Q6NZL8;A2A442;Q6NZL8-2;Q6NZL8-3;Q68EF9	A2A443;Q6NZL8;A2A442;Q6NZL8-2;Q6NZL8-3;Q68EF9	Signal peptide, CUB and EGF-like domain-containing protein 1	Scube1	>tr|A2A443|A2A443_MOUSE Signal peptide CUB domain EGF-like 1 OS=Mus musculus GN=Scube1 PE=4 SV=1;>sp|Q6NZL8|SCUB1_MOUSE Signal peptide, CUB and EGF-like domain-containing protein 1 OS=Mus musculus GN=Scube1 PE=2 SV=2;>tr|A2A442|A2A442_MOUSE Signal peptide	6	1	1	1	1	0	1	0	0	0	1	1	1	0	0	0	1	0	1	0	0	0	1	1	1	0	0	0	1	0	1	0	0	0	1	1	1	0	0	0	1.2	1.2	1.2	111.6	1018
A2A462;Q9ET26;E9Q233	A2A462;Q9ET26;E9Q233	RING finger protein 114	Rnf114	>tr|A2A462|A2A462_MOUSE Ring finger protein 114 OS=Mus musculus GN=Rnf114 PE=4 SV=1;>sp|Q9ET26|RN114_MOUSE RING finger protein 114 OS=Mus musculus GN=Rnf114 PE=2 SV=2;>tr|E9Q233|E9Q233_MOUSE RING finger protein 114 OS=Mus musculus GN=Rnf114 PE=4 SV=1	3	4	4	4	2	4	4	1	1	2	3	4	4	2	2	1	2	4	4	1	1	2	3	4	4	2	2	1	2	4	4	1	1	2	3	4	4	2	2	1	24	24	24	25.745	229
A2A485;A2A484;E9Q8D3;A2A482;A2A483;E9Q8D1;Q3UH28;A2A480;A2A481;A2A486	A2A485;A2A484;E9Q8D3;A2A482;A2A483;E9Q8D1;Q3UH28;A2A480;A2A481		Zmynd8	>tr|A2A485|A2A485_MOUSE Protein Zmynd8 OS=Mus musculus GN=Zmynd8 PE=4 SV=1;>tr|A2A484|A2A484_MOUSE Protein Zmynd8 OS=Mus musculus GN=Zmynd8 PE=4 SV=1;>tr|E9Q8D3|E9Q8D3_MOUSE Protein Zmynd8 OS=Mus musculus GN=Zmynd8 PE=4 SV=1;>tr|A2A482|A2A482_MOUSE Protein	10	5	5	5	2	2	3	1	0	0	4	3	3	0	1	1	2	2	3	1	0	0	4	3	3	0	1	1	2	2	3	1	0	0	4	3	3	0	1	1	5.5	5.5	5.5	120.84	1094
A2A4A5;Q9CQU8	A2A4A5;Q9CQU8	Mitochondrial inner membrane protease subunit 1	Immp1l	>tr|A2A4A5|A2A4A5_MOUSE IMP1 inner mitochondrial membrane peptidase-like (S. cerevisiae) OS=Mus musculus GN=Immp1l PE=3 SV=1;>sp|Q9CQU8|IMP1L_MOUSE Mitochondrial inner membrane protease subunit 1 OS=Mus musculus GN=Immp1l PE=2 SV=1	2	4	4	4	0	0	1	2	2	1	0	0	0	2	2	4	0	0	1	2	2	1	0	0	0	2	2	4	0	0	1	2	2	1	0	0	0	2	2	4	28.9	28.9	28.9	18.502	166
A2A4A7;Q62077;A2A4A6;G3UXP4	A2A4A7;Q62077;A2A4A6;G3UXP4	1-phosphatidylinositol-4,5-bisphosphate phosphodiesterase gamma-1	Plcg1	>tr|A2A4A7|A2A4A7_MOUSE Phospholipase C, gamma 1 OS=Mus musculus GN=Plcg1 PE=4 SV=1;>sp|Q62077|PLCG1_MOUSE 1-phosphatidylinositol 4,5-bisphosphate phosphodiesterase gamma-1 OS=Mus musculus GN=Plcg1 PE=1 SV=2;>tr|A2A4A6|A2A4A6_MOUSE 1-phosphatidylinositol 4	4	3	3	3	3	1	2	0	0	0	0	3	0	0	1	0	3	1	2	0	0	0	0	3	0	0	1	0	3	1	2	0	0	0	0	3	0	0	1	0	3.1	3.1	3.1	149.67	1302
A2A4H0;P33609;B9EHJ9	A2A4H0;P33609	DNA polymerase;DNA polymerase alpha catalytic subunit	Pola1	>tr|A2A4H0|A2A4H0_MOUSE DNA polymerase OS=Mus musculus GN=Pola1 PE=3 SV=1;>sp|P33609|DPOLA_MOUSE DNA polymerase alpha catalytic subunit OS=Mus musculus GN=Pola1 PE=1 SV=2	3	4	4	4	3	1	2	1	1	1	2	2	3	0	0	0	3	1	2	1	1	1	2	2	3	0	0	0	3	1	2	1	1	1	2	2	3	0	0	0	3.6	3.6	3.6	167.34	1465
A2A4H7;Q02257	A2A4H7;Q02257	Junction plakoglobin	Jup	>tr|A2A4H7|A2A4H7_MOUSE Junction plakoglobin OS=Mus musculus GN=Jup PE=4 SV=1;>sp|Q02257|PLAK_MOUSE Junction plakoglobin OS=Mus musculus GN=Jup PE=1 SV=3	2	53	53	46	40	40	41	39	34	43	39	40	40	45	46	48	40	40	41	39	34	43	39	40	40	45	46	48	33	33	34	32	28	37	33	33	33	38	40	41	81.9	81.9	72.8	81.8	745
A2A4J8;Q9CQ80;A2A4K0;Q9CQ80-2;A8XY17;E9PXS9	A2A4J8;Q9CQ80;A2A4K0;Q9CQ80-2;A8XY17;E9PXS9	Vacuolar protein-sorting-associated protein 25	Vps25	>tr|A2A4J8|A2A4J8_MOUSE Vacuolar protein sorting 25 (Yeast) OS=Mus musculus GN=Vps25 PE=4 SV=1;>sp|Q9CQ80|VPS25_MOUSE Vacuolar protein-sorting-associated protein 25 OS=Mus musculus GN=Vps25 PE=2 SV=1;>tr|A2A4K0|A2A4K0_MOUSE Vacuolar protein sorting 25 (Yea	6	11	11	11	8	9	8	2	4	3	8	8	8	2	2	3	8	9	8	2	4	3	8	8	8	2	2	3	8	9	8	2	4	3	8	8	8	2	2	3	71.7	71.7	71.7	21.594	184
A2A4L8;O54941;C0IMW9	A2A4L8;O54941	SWI/SNF-related matrix-associated actin-dependent regulator of chromatin subfamily E member 1	Smarce1	>tr|A2A4L8|A2A4L8_MOUSE MCG15366, isoform CRA_c OS=Mus musculus GN=Smarce1 PE=4 SV=1;>sp|O54941|SMCE1_MOUSE SWI/SNF-related matrix-associated actin-dependent regulator of chromatin subfamily E member 1 OS=Mus musculus GN=Smarce1 PE=1 SV=1	3	10	10	10	9	7	8	1	3	1	6	7	9	3	4	2	9	7	8	1	3	1	6	7	9	3	4	2	9	7	8	1	3	1	6	7	9	3	4	2	39.4	39.4	39.4	46.638	411
A2A4N1;Q8VC04;A2A4N0;A2A4M9	A2A4N1;Q8VC04;A2A4N0;A2A4M9	Transmembrane protein 106A	Tmem106a	>tr|A2A4N1|A2A4N1_MOUSE Transmembrane protein 106A OS=Mus musculus GN=Tmem106a PE=4 SV=1;>sp|Q8VC04|T106A_MOUSE Transmembrane protein 106A OS=Mus musculus GN=Tmem106a PE=2 SV=1;>tr|A2A4N0|A2A4N0_MOUSE Transmembrane protein 106A (Fragment) OS=Mus musculus G	4	5	5	5	3	3	3	4	4	5	3	3	3	4	4	5	3	3	3	4	4	5	3	3	3	4	4	5	3	3	3	4	4	5	3	3	3	4	4	5	27.2	27.2	27.2	29.109	261
A2A4Q1;Q9D8C4;D6RFB1	A2A4Q1;Q9D8C4	Interferon-induced 35 kDa protein homolog	Ifi35	>tr|A2A4Q1|A2A4Q1_MOUSE Interferon-induced protein 35 OS=Mus musculus GN=Ifi35 PE=4 SV=1;>sp|Q9D8C4|IN35_MOUSE Interferon-induced 35 kDa protein homolog OS=Mus musculus GN=Ifi35 PE=2 SV=3	3	11	11	11	10	9	11	8	6	6	10	9	9	8	4	6	10	9	11	8	6	6	10	9	9	8	4	6	10	9	11	8	6	6	10	9	9	8	4	6	49.7	49.7	49.7	31.875	286
A2A4U6	A2A4U6		Zfp334	>tr|A2A4U6|A2A4U6_MOUSE Protein Zfp334 OS=Mus musculus GN=Zfp334 PE=4 SV=1	1	2	2	2	1	1	1	2	2	2	1	1	1	2	2	2	1	1	1	2	2	2	1	1	1	2	2	2	1	1	1	2	2	2	1	1	1	2	2	2	2.5	2.5	2.5	78.257	679
A2A4Z2;P20801	A2A4Z2;P20801	Troponin C, skeletal muscle	Tnnc2	>tr|A2A4Z2|A2A4Z2_MOUSE Troponin C2, fast OS=Mus musculus GN=Tnnc2 PE=4 SV=1;>sp|P20801|TNNC2_MOUSE Troponin C, skeletal muscle OS=Mus musculus GN=Tnnc2 PE=1 SV=2	2	3	2	2	3	1	1	0	0	0	1	1	0	1	1	1	2	0	0	0	0	0	0	0	0	0	0	0	2	0	0	0	0	0	0	0	0	0	0	0	18.8	14.4	14.4	18.11	160
A2A517;E9Q5M8;Q3TZ02;Q9QX11;Q8K3E8;Q9QX11-2;B1AQE4	A2A517;E9Q5M8;Q3TZ02;Q9QX11;Q8K3E8;Q9QX11-2	Cytohesin-1	Cyth1	>tr|A2A517|A2A517_MOUSE Cytohesin 1 (Fragment) OS=Mus musculus GN=Cyth1 PE=4 SV=1;>tr|E9Q5M8|E9Q5M8_MOUSE Cytohesin-1 OS=Mus musculus GN=Cyth1 PE=4 SV=1;>tr|Q3TZ02|Q3TZ02_MOUSE Cytohesin-1 OS=Mus musculus GN=Cyth1 PE=2 SV=1;>sp|Q9QX11|CYH1_MOUSE Cytohesin-	7	7	2	2	4	5	3	3	1	1	5	5	5	2	1	1	0	1	0	1	0	0	1	1	2	0	0	0	0	1	0	1	0	0	1	1	2	0	0	0	19.1	7.4	7.4	52.492	460
A2A557;P70424;Q3U1V8;B2KGF7	A2A557;P70424	Receptor tyrosine-protein kinase erbB-2	Erbb2	>tr|A2A557|A2A557_MOUSE MCG21919, isoform CRA_b OS=Mus musculus GN=Erbb2 PE=3 SV=1;>sp|P70424|ERBB2_MOUSE Receptor tyrosine-protein kinase erbB-2 OS=Mus musculus GN=Erbb2 PE=1 SV=3	4	31	31	28	12	13	15	18	16	18	14	12	12	21	27	23	12	13	15	18	16	18	14	12	12	21	27	23	11	11	14	16	14	17	12	11	12	20	25	22	32.4	32.4	30.8	138.58	1256
A2A559;A2A559-2	A2A559;A2A559-2	Post-GPI attachment to proteins factor 3	Pgap3	>sp|A2A559|PGAP3_MOUSE Post-GPI attachment to proteins factor 3 OS=Mus musculus GN=Pgap3 PE=2 SV=1;>sp|A2A559-2|PGAP3_MOUSE Isoform 2 of Post-GPI attachment to proteins factor 3 OS=Mus musculus GN=Pgap3	2	1	1	1	1	0	1	1	1	1	1	1	1	1	1	1	1	0	1	1	1	1	1	1	1	1	1	1	1	0	1	1	1	1	1	1	1	1	1	1	3.4	3.4	3.4	36.527	320
A2A5E2;Q9QYI3;F7BTP8;A2A5E1	A2A5E2;Q9QYI3;F7BTP8	DnaJ homolog subfamily C member 7	Dnajc7	>tr|A2A5E2|A2A5E2_MOUSE DnaJ (Hsp40) homolog, subfamily C, member 7 OS=Mus musculus GN=Dnajc7 PE=4 SV=1;>sp|Q9QYI3|DNJC7_MOUSE DnaJ homolog subfamily C member 7 OS=Mus musculus GN=Dnajc7 PE=1 SV=2;>tr|F7BTP8|F7BTP8_MOUSE DnaJ homolog subfamily C member 7 (	4	24	24	24	12	16	18	8	7	5	16	19	21	11	10	6	12	16	18	8	7	5	16	19	21	11	10	6	12	16	18	8	7	5	16	19	21	11	10	6	58.5	58.5	58.5	56.475	494
A2A5F8;Q78S06;E9PXJ7;D6RE24	A2A5F8;Q78S06;E9PXJ7;D6RE24	Protein SYS1 homolog	Sys1;Gm20458	>tr|A2A5F8|A2A5F8_MOUSE RIKEN cDNA 2610042O14, isoform CRA_a OS=Mus musculus GN=Sys1 PE=4 SV=1;>sp|Q78S06|SYS1_MOUSE Protein SYS1 homolog OS=Mus musculus GN=Sys1 PE=2 SV=1;>tr|E9PXJ7|E9PXJ7_MOUSE Uncharacterized protein OS=Mus musculus GN=Gm20458 PE=4 SV=1	4	2	2	2	1	1	0	2	2	2	1	1	2	2	2	2	1	1	0	2	2	2	1	1	2	2	2	2	1	1	0	2	2	2	1	1	2	2	2	2	19.9	19.9	19.9	17.554	156
A2A5K6	A2A5K6		Zfp335	>tr|A2A5K6|A2A5K6_MOUSE Protein Zfp335 OS=Mus musculus GN=Zfp335 PE=4 SV=1	1	1	1	1	1	0	1	0	0	0	1	1	1	0	0	0	1	0	1	0	0	0	1	1	1	0	0	0	1	0	1	0	0	0	1	1	1	0	0	0	1.1	1.1	1.1	145.6	1337
A2A5L8;Q9JI11;Q8CDG4;A2A5M9	A2A5L8;Q9JI11	Serine/threonine-protein kinase 4;Serine/threonine-protein kinase 4 37kDa subunit;Serine/threonine-protein kinase 4 18kDa subunit	Stk4	>tr|A2A5L8|A2A5L8_MOUSE Serine/threonine kinase 4 OS=Mus musculus GN=Stk4 PE=4 SV=1;>sp|Q9JI11|STK4_MOUSE Serine/threonine-protein kinase 4 OS=Mus musculus GN=Stk4 PE=1 SV=1	4	12	12	9	8	7	10	3	4	4	8	7	7	3	5	4	8	7	10	3	4	4	8	7	7	3	5	4	6	5	8	1	2	3	6	5	5	1	3	2	32	32	23.2	55.541	487
A2A5N2;Q9CQV8;Q9CQV8-2;A2A5N1	A2A5N2;Q9CQV8;Q9CQV8-2;A2A5N1	14-3-3 protein beta/alpha;14-3-3 protein beta/alpha, N-terminally processed	Ywhab	>tr|A2A5N2|A2A5N2_MOUSE Tyrosine 3-monooxygenase/tryptophan 5-monooxygenase activation protein, beta OS=Mus musculus GN=Ywhab PE=2 SV=1;>sp|Q9CQV8|1433B_MOUSE 14-3-3 protein beta/alpha OS=Mus musculus GN=Ywhab PE=1 SV=3;>sp|Q9CQV8-2|1433B_MOUSE Isoform Sho	4	16	11	11	15	14	14	11	11	11	15	14	15	14	11	12	10	9	9	7	7	7	10	9	10	9	6	7	10	9	9	7	7	7	10	9	10	9	6	7	66.3	50.8	50.8	28.086	246
A2A5N9;Q9QZS5;E9Q4F0;Q9QZS5-2	A2A5N9;Q9QZS5;E9Q4F0;Q9QZS5-2	Serine/threonine-protein kinase Sgk2	Sgk2	>tr|A2A5N9|A2A5N9_MOUSE Serum/glucocorticoid regulated kinase 2 OS=Mus musculus GN=Sgk2 PE=4 SV=1;>sp|Q9QZS5|SGK2_MOUSE Serine/threonine-protein kinase Sgk2 OS=Mus musculus GN=Sgk2 PE=1 SV=1;>tr|E9Q4F0|E9Q4F0_MOUSE Serine/threonine-protein kinase Sgk2 OS=M	4	1	1	1	1	0	1	1	0	1	1	1	1	1	1	1	1	0	1	1	0	1	1	1	1	1	1	1	1	0	1	1	0	1	1	1	1	1	1	1	3.8	3.8	3.8	41.359	367
A2A5R2;F6YCJ0	A2A5R2		Arfgef2	>tr|A2A5R2|A2A5R2_MOUSE ADP-ribosylation factor guanine nucleotide-exchange factor 2 (Brefeldin A-inhibited) OS=Mus musculus GN=Arfgef2 PE=2 SV=1	2	51	35	35	30	31	33	22	16	17	29	32	37	26	26	27	21	19	21	15	9	12	19	23	24	14	16	16	21	19	21	15	9	12	19	23	24	14	16	16	33.5	24.2	24.2	202.24	1792
A2A5S1;Q9ERK4;E9Q1T9;F6ZEW4;E9QAX7;F7D1H9	A2A5S1;Q9ERK4;E9Q1T9;F6ZEW4;E9QAX7	Exportin-2	Cse1l	>tr|A2A5S1|A2A5S1_MOUSE Chromosome segregation 1-like (S. cerevisiae) OS=Mus musculus GN=Cse1l PE=4 SV=1;>sp|Q9ERK4|XPO2_MOUSE Exportin-2 OS=Mus musculus GN=Cse1l PE=2 SV=1;>tr|E9Q1T9|E9Q1T9_MOUSE Exportin-2 OS=Mus musculus GN=Cse1l PE=4 SV=1;>tr|F6ZEW4|F6	6	34	34	34	22	28	29	21	23	23	28	27	27	24	21	23	22	28	29	21	23	23	28	27	27	24	21	23	22	28	29	21	23	23	28	27	27	24	21	23	41.8	41.8	41.8	110.45	971
A2A5V4;P55194;A2A5V2;A2A5V3;A2A5V1	A2A5V4;P55194;A2A5V2;A2A5V3	SH3 domain-binding protein 1	Sh3bp1	>tr|A2A5V4|A2A5V4_MOUSE SH3 domain-binding protein 1 OS=Mus musculus GN=Sh3bp1 PE=4 SV=1;>sp|P55194|3BP1_MOUSE SH3 domain-binding protein 1 OS=Mus musculus GN=Sh3bp1 PE=1 SV=2;>tr|A2A5V2|A2A5V2_MOUSE SH3 domain-binding protein 1 OS=Mus musculus GN=Sh3bp1 P	5	14	14	14	9	6	11	3	1	3	4	8	10	2	4	2	9	6	11	3	1	3	4	8	10	2	4	2	9	6	11	3	1	3	4	8	10	2	4	2	29.6	29.6	29.6	74.172	680
A2A5Y4;B1AQW0;Q80TG1;Q80TG1-2;Q80TG1-3;Q80TG1-4	A2A5Y4;B1AQW0;Q80TG1;Q80TG1-2;Q80TG1-3;Q80TG1-4	KAT8 regulatory NSL complex subunit 1	1700081L11Rik;Kiaa1267	>tr|A2A5Y4|A2A5Y4_MOUSE MCG141096, isoform CRA_a OS=Mus musculus GN=Kansl1 PE=4 SV=1;>tr|B1AQW0|B1AQW0_MOUSE MCG141096, isoform CRA_c OS=Mus musculus GN=Kansl1 PE=4 SV=1;>sp|Q80TG1|KANL1_MOUSE KAT8 regulatory NSL complex subunit 1 OS=Mus musculus GN=Kansl1	6	1	1	1	1	1	1	0	1	0	1	1	1	0	0	0	1	1	1	0	1	0	1	1	1	0	0	0	1	1	1	0	1	0	1	1	1	0	0	0	0.9	0.9	0.9	120.4	1099
A2A5Z6;A2A5Z6-2	A2A5Z6;A2A5Z6-2	E3 ubiquitin-protein ligase SMURF2	Smurf2	>sp|A2A5Z6|SMUF2_MOUSE E3 ubiquitin-protein ligase SMURF2 OS=Mus musculus GN=Smurf2 PE=1 SV=1;>sp|A2A5Z6-2|SMUF2_MOUSE Isoform 2 of E3 ubiquitin-protein ligase SMURF2 OS=Mus musculus GN=Smurf2	2	7	7	5	6	6	6	3	3	3	6	5	6	3	4	4	6	6	6	3	3	3	6	5	6	3	4	4	4	4	4	2	2	2	4	3	4	2	3	3	9.8	9.8	7.9	86.174	748
A2A614;Q61017	A2A614;Q61017	Guanine nucleotide-binding protein subunit gamma;Guanine nucleotide-binding protein G(I)/G(S)/G(O) subunit gamma-T2	Gngt2	>tr|A2A614|A2A614_MOUSE Guanine nucleotide-binding protein subunit gamma OS=Mus musculus GN=Gngt2 PE=3 SV=1;>sp|Q61017|GBGT2_MOUSE Guanine nucleotide-binding protein G(I)/G(S)/G(O) subunit gamma-T2 OS=Mus musculus GN=Gngt2 PE=2 SV=2	2	1	1	1	0	0	0	1	1	1	0	0	0	0	1	0	0	0	0	1	1	1	0	0	0	0	1	0	0	0	0	1	1	1	0	0	0	0	1	0	20.3	20.3	20.3	7.8019	69
A2A615;Q09199	A2A615;Q09199	Beta-1,4 N-acetylgalactosaminyltransferase 2	B4galnt2	>tr|A2A615|A2A615_MOUSE B4galnt2 OS=Mus musculus GN=B4galnt2 PE=2 SV=1;>sp|Q09199|B4GN2_MOUSE Beta-1,4 N-acetylgalactosaminyltransferase 2 OS=Mus musculus GN=B4galnt2 PE=2 SV=1	2	39	39	39	30	29	34	33	31	34	30	30	34	38	38	37	30	29	34	33	31	34	30	30	34	38	38	37	30	29	34	33	31	34	30	30	34	38	38	37	64.9	64.9	64.9	58.317	510
A2A684;Q60720	A2A684;Q60720	Cytochrome b561	Cyb561	>tr|A2A684|A2A684_MOUSE Cytochrome b-561 OS=Mus musculus GN=Cyb561 PE=4 SV=1;>sp|Q60720|CY561_MOUSE Cytochrome b561 OS=Mus musculus GN=Cyb561 PE=2 SV=2	2	3	3	3	1	1	2	3	2	2	1	2	1	1	3	2	1	1	2	3	2	2	1	2	1	1	3	2	1	1	2	3	2	2	1	2	1	1	3	2	10.4	10.4	10.4	27.821	250
A2A6A1	A2A6A1	G patch domain-containing protein 8	Gpatch8	>sp|A2A6A1|GPTC8_MOUSE G patch domain-containing protein 8 OS=Mus musculus GN=Gpatch8 PE=2 SV=1	1	8	8	8	3	5	3	0	1	0	4	4	5	0	0	0	3	5	3	0	1	0	4	4	5	0	0	0	3	5	3	0	1	0	4	4	5	0	0	0	7.5	7.5	7.5	164.99	1505
A2A6C8;P83917;Q9CYJ8;Q7TPM0	A2A6C8;P83917;Q9CYJ8;Q7TPM0	Chromobox protein homolog 1	Cbx1	>tr|A2A6C8|A2A6C8_MOUSE Chromobox homolog 1 (Drosophila HP1 beta) OS=Mus musculus GN=Cbx1 PE=4 SV=1;>sp|P83917|CBX1_MOUSE Chromobox protein homolog 1 OS=Mus musculus GN=Cbx1 PE=1 SV=1;>tr|Q9CYJ8|Q9CYJ8_MOUSE Chromobox homolog 1 (Drosophila HP1 beta) OS=Mus	4	6	5	5	5	6	5	2	1	2	5	6	5	1	1	2	4	5	4	1	1	2	4	5	4	1	1	1	4	5	4	1	1	2	4	5	4	1	1	1	35.7	27	27	21.418	185
A2A6E3;Q99LM2;F2Z486;B0QZI8;A2A6D9;D6RJ46;A2A6E1;A2A6E0;Q60636-2;D6RII4	A2A6E3;Q99LM2	CDK5 regulatory subunit-associated protein 3	Cdk5rap3	>tr|A2A6E3|A2A6E3_MOUSE CDK5 regulatory subunit associated protein 3 OS=Mus musculus GN=Cdk5rap3 PE=4 SV=1;>sp|Q99LM2|CK5P3_MOUSE CDK5 regulatory subunit-associated protein 3 OS=Mus musculus GN=Cdk5rap3 PE=2 SV=1	10	16	16	16	10	11	13	6	6	6	13	13	12	11	11	10	10	11	13	6	6	6	13	13	12	11	11	10	10	11	13	6	6	6	13	13	12	11	11	10	38	38	38	56.99	503
A2A6F9;P62830;A2A6F8	A2A6F9;P62830	60S ribosomal protein L23	Rpl23	>tr|A2A6F9|A2A6F9_MOUSE Ribosomal protein L23 OS=Mus musculus GN=Rpl23 PE=3 SV=1;>sp|P62830|RL23_MOUSE 60S ribosomal protein L23 OS=Mus musculus GN=Rpl23 PE=1 SV=1	3	12	12	12	10	9	10	8	5	9	10	11	12	9	9	9	10	9	10	8	5	9	10	11	12	9	9	9	10	9	10	8	5	9	10	11	12	9	9	9	64.3	64.3	64.3	14.865	140
A2A6J7;A2A6J4	A2A6J7;A2A6J4		Lsp1	>tr|A2A6J7|A2A6J7_MOUSE Lymphocyte specific 1 OS=Mus musculus GN=Lsp1 PE=4 SV=1;>tr|A2A6J4|A2A6J4_MOUSE Lymphocyte specific 1 OS=Mus musculus GN=Lsp1 PE=4 SV=1	2	11	1	1	9	10	8	4	2	4	9	9	10	2	2	3	1	1	1	0	0	0	1	1	1	0	0	0	1	1	1	0	0	0	1	1	1	0	0	0	51.2	5.6	5.6	35.928	324
A2A6N7;Q9Z160;F6ZJ01;Q810S7;A2A6N9;F6QQB5;F6RK91;F6V3F1	A2A6N7;Q9Z160;F6ZJ01	Conserved oligomeric Golgi complex subunit 1	Cog1	>tr|A2A6N7|A2A6N7_MOUSE Component of oligomeric golgi complex 1 OS=Mus musculus GN=Cog1 PE=4 SV=1;>sp|Q9Z160|COG1_MOUSE Conserved oligomeric Golgi complex subunit 1 OS=Mus musculus GN=Cog1 PE=2 SV=3;>tr|F6ZJ01|F6ZJ01_MOUSE Conserved oligomeric Golgi comple	8	14	14	14	9	8	8	5	6	4	9	9	11	6	5	5	9	8	8	5	6	4	9	9	11	6	5	5	9	8	8	5	6	4	9	9	11	6	5	5	17.6	17.6	17.6	109.05	980
A2A6P4	A2A6P4		D11Wsu99e	>tr|A2A6P4|A2A6P4_MOUSE Likely orthologue of family with sequence similarity 104, member A (FAM104A) OS=Mus musculus GN=D11Wsu99e PE=4 SV=1	1	1	1	1	1	1	1	0	0	1	1	1	1	0	1	1	1	1	1	0	0	1	1	1	1	0	1	1	1	1	1	0	0	1	1	1	1	0	1	1	13	13	13	19.618	185
A2A6Q1;Q9JM96;A2A6Q2;A2A6Q3	A2A6Q1;Q9JM96;A2A6Q2;A2A6Q3	Cdc42 effector protein 4	Cdc42ep4	>tr|A2A6Q1|A2A6Q1_MOUSE CDC42 effector protein (Rho GTPase binding) 4 OS=Mus musculus GN=Cdc42ep4 PE=4 SV=1;>sp|Q9JM96|BORG4_MOUSE Cdc42 effector protein 4 OS=Mus musculus GN=Cdc42ep4 PE=1 SV=1;>tr|A2A6Q2|A2A6Q2_MOUSE CDC42 effector protein (Rho GTPase bin	4	5	5	5	2	3	4	0	0	0	3	3	5	0	0	0	2	3	4	0	0	0	3	3	5	0	0	0	2	3	4	0	0	0	3	3	5	0	0	0	20.9	20.9	20.9	37.869	349
A2A6Q5-3;A2A6Q5;A2A6Q5-2;Q8R568	A2A6Q5-3;A2A6Q5;A2A6Q5-2;Q8R568	Cell division cycle protein 27 homolog	Cdc27	>sp|A2A6Q5-3|CDC27_MOUSE Isoform 3 of Cell division cycle protein 27 homolog OS=Mus musculus GN=Cdc27;>sp|A2A6Q5|CDC27_MOUSE Cell division cycle protein 27 homolog OS=Mus musculus GN=Cdc27 PE=1 SV=1;>sp|A2A6Q5-2|CDC27_MOUSE Isoform 2 of Cell division cycle	4	4	4	4	3	4	4	2	1	2	3	2	2	1	1	1	3	4	4	2	1	2	3	2	2	1	1	1	3	4	4	2	1	2	3	2	2	1	1	1	6.4	6.4	6.4	92.533	831
A2A6S0;Q3TB48;A2A6S1	A2A6S0;Q3TB48;A2A6S1	Transmembrane protein 104	Tmem104	>tr|A2A6S0|A2A6S0_MOUSE Transmembrane protein 104 OS=Mus musculus GN=Tmem104 PE=4 SV=1;>sp|Q3TB48|TM104_MOUSE Transmembrane protein 104 OS=Mus musculus GN=Tmem104 PE=2 SV=1;>tr|A2A6S1|A2A6S1_MOUSE Transmembrane protein 104 OS=Mus musculus GN=Tmem104 PE=4 S	3	6	6	6	2	2	2	4	4	3	4	3	3	3	4	4	2	2	2	4	4	3	4	3	3	3	4	4	2	2	2	4	4	3	4	3	3	3	4	4	13.7	13.7	13.7	55.838	496
A2A6S3;Q61578	A2A6S3;Q61578	NADPH:adrenodoxin oxidoreductase, mitochondrial	Fdxr	>tr|A2A6S3|A2A6S3_MOUSE NADPH:adrenodoxin oxidoreductase, mitochondrial OS=Mus musculus GN=Fdxr PE=3 SV=1;>sp|Q61578|ADRO_MOUSE NADPH:adrenodoxin oxidoreductase, mitochondrial OS=Mus musculus GN=Fdxr PE=2 SV=1	2	16	16	16	11	9	11	4	3	4	12	9	10	5	9	6	11	9	11	4	3	4	12	9	10	5	9	6	11	9	11	4	3	4	12	9	10	5	9	6	42.7	42.7	42.7	54.201	494
A2A6U3;Q80UG5;Q80UG5-3;Q80UG5-2;A2A6U5;A8Y5D3;Q9Z1S5;Q9Z1S5-2	A2A6U3;Q80UG5;Q80UG5-3;Q80UG5-2	Septin-9	2013-09-09	>tr|A2A6U3|A2A6U3_MOUSE Septin 9 OS=Mus musculus GN=Sept9 PE=3 SV=1;>sp|Q80UG5|SEPT9_MOUSE Septin-9 OS=Mus musculus GN=Sept9 PE=1 SV=1;>sp|Q80UG5-3|SEPT9_MOUSE Isoform 3 of Septin-9 OS=Mus musculus GN=Sept9;>sp|Q80UG5-2|SEPT9_MOUSE Isoform 2 of Septin-9 OS	8	25	25	24	16	17	20	16	12	16	18	19	19	15	15	16	16	17	20	16	12	16	18	19	19	15	15	16	15	16	19	15	11	15	17	18	18	14	14	15	62.1	62.1	62.1	63.772	565
A2A712;Q8VCA8;A2A709	A2A712;Q8VCA8	Secernin-2	Scrn2	>tr|A2A712|A2A712_MOUSE Secernin 2 OS=Mus musculus GN=Scrn2 PE=4 SV=1;>sp|Q8VCA8|SCRN2_MOUSE Secernin-2 OS=Mus musculus GN=Scrn2 PE=2 SV=1	3	7	7	7	6	4	7	3	2	3	5	5	5	3	3	4	6	4	7	3	2	3	5	5	5	3	3	4	6	4	7	3	2	3	5	5	5	3	3	4	26.6	26.6	26.6	46.6	425
A2A714;Q3TBW2;A2A715	A2A714;Q3TBW2;A2A715	39S ribosomal protein L10, mitochondrial	Mrpl10	>tr|A2A714|A2A714_MOUSE Mitochondrial ribosomal protein L10 OS=Mus musculus GN=Mrpl10 PE=4 SV=1;>sp|Q3TBW2|RM10_MOUSE 39S ribosomal protein L10, mitochondrial OS=Mus musculus GN=Mrpl10 PE=2 SV=2;>tr|A2A715|A2A715_MOUSE 39S ribosomal protein L10, mitochondr	3	5	5	5	2	3	4	2	2	2	2	3	3	2	2	3	2	3	4	2	2	2	2	3	3	2	2	3	2	3	4	2	2	2	2	3	3	2	2	3	24.4	24.4	24.4	29.395	262
A2A716;F8VQM4;E9Q8N9	A2A716;F8VQM4	Oxysterol-binding protein	Osbpl7	>tr|A2A716|A2A716_MOUSE Oxysterol-binding protein OS=Mus musculus GN=Osbpl7 PE=3 SV=1;>tr|F8VQM4|F8VQM4_MOUSE Oxysterol-binding protein OS=Mus musculus GN=Osbpl7 PE=3 SV=1	3	8	8	8	3	5	5	1	2	2	3	4	4	0	1	2	3	5	5	1	2	2	3	4	4	0	1	2	3	5	5	1	2	2	3	4	4	0	1	2	11.1	11.1	11.1	108.13	963
A2A724;P39098;P39098-2;A2A723	A2A724;P39098;P39098-2	Mannosyl-oligosaccharide 1,2-alpha-mannosidase IB	Man1a2	>tr|A2A724|A2A724_MOUSE Mannosidase, alpha, class 1A, member 2 OS=Mus musculus GN=Man1a2 PE=4 SV=1;>sp|P39098|MA1A2_MOUSE Mannosyl-oligosaccharide 1,2-alpha-mannosidase IB OS=Mus musculus GN=Man1a2 PE=2 SV=1;>sp|P39098-2|MA1A2_MOUSE Isoform 2 of Mannosyl-o	4	19	18	18	10	13	9	11	9	11	12	13	11	15	13	15	9	13	9	10	8	10	11	12	11	15	12	14	9	13	9	10	8	10	11	12	11	15	12	14	35.1	34	34	72.871	641
A2A765;P70353;Q3U114;A2A763;A2A762	A2A765;P70353;Q3U114;A2A763;A2A762	Nuclear transcription factor Y subunit gamma	Nfyc	>tr|A2A765|A2A765_MOUSE MCG13519 OS=Mus musculus GN=Nfyc PE=4 SV=1;>sp|P70353|NFYC_MOUSE Nuclear transcription factor Y subunit gamma OS=Mus musculus GN=Nfyc PE=2 SV=2;>tr|Q3U114|Q3U114_MOUSE Nuclear transcription factor Y subunit gamma OS=Mus musculus GN=	5	2	2	2	1	1	2	0	0	0	1	1	2	0	0	0	1	1	2	0	0	0	1	1	2	0	0	0	1	1	2	0	0	0	1	1	2	0	0	0	9.9	9.9	9.9	37.253	335
A2A7A7;Q8CFX1;A2A7A8	A2A7A7;Q8CFX1	GDH/6PGL endoplasmic bifunctional protein;Glucose 1-dehydrogenase;6-phosphogluconolactonase	H6pd	>tr|A2A7A7|A2A7A7_MOUSE 6-phosphogluconolactonase OS=Mus musculus GN=H6pd PE=4 SV=1;>sp|Q8CFX1|G6PE_MOUSE GDH/6PGL endoplasmic bifunctional protein OS=Mus musculus GN=H6pd PE=2 SV=2	3	19	19	19	10	8	16	8	6	5	10	9	9	10	13	12	10	8	16	8	6	5	10	9	9	10	13	12	10	8	16	8	6	5	10	9	9	10	13	12	30.6	30.6	30.6	89.909	797
A2A7S7;Q91WQ3;F6VXZ2	A2A7S7;Q91WQ3	Tyrosine--tRNA ligase, cytoplasmic	Yars	>tr|A2A7S7|A2A7S7_MOUSE Tyrosine--tRNA ligase, cytoplasmic OS=Mus musculus GN=Yars PE=4 SV=1;>sp|Q91WQ3|SYYC_MOUSE Tyrosine--tRNA ligase, cytoplasmic OS=Mus musculus GN=Yars PE=2 SV=3	3	30	30	30	15	21	21	11	5	9	22	23	25	14	14	12	15	21	21	11	5	9	22	23	25	14	14	12	15	21	21	11	5	9	22	23	25	14	14	12	65.2	65.2	65.2	63.001	564
A2A7S8-2;A2A7S8-4;A2A7S8;A2A7S8-3	A2A7S8-2;A2A7S8-4;A2A7S8;A2A7S8-3	Uncharacterized protein KIAA1522	Kiaa1522	>sp|A2A7S8-2|K1522_MOUSE Isoform 2 of Uncharacterized protein KIAA1522 OS=Mus musculus GN=Kiaa1522;>sp|A2A7S8-4|K1522_MOUSE Isoform 4 of Uncharacterized protein KIAA1522 OS=Mus musculus GN=Kiaa1522;>sp|A2A7S8|K1522_MOUSE Uncharacterized protein KIAA1522 OS	4	24	24	24	16	15	20	12	12	15	13	12	20	11	11	10	16	15	20	12	12	15	13	12	20	11	11	10	16	15	20	12	12	15	13	12	20	11	11	10	31.9	31.9	31.9	110.65	1070
A2A7Y2;P70277	A2A7Y2;P70277	Alpha-N-acetylgalactosaminide alpha-2,6-sialyltransferase 2	St6galnac2	>tr|A2A7Y2|A2A7Y2_MOUSE ST6 (Alpha-N-acetyl-neuraminyl-2,3-beta-galactosyl-1, 3)-N-acetylgalactosaminide alpha-2,6-sialyltransferase 2 OS=Mus musculus GN=St6galnac2 PE=4 SV=1;>sp|P70277|SIA7B_MOUSE Alpha-N-acetylgalactosaminide alpha-2,6-sialyltransferase	2	4	4	4	3	4	3	4	1	2	4	3	3	3	3	3	3	4	3	4	1	2	4	3	3	3	3	3	3	4	3	4	1	2	4	3	3	3	3	3	12.9	12.9	12.9	42.481	373
A2A7Z0;Q9R0E2;F6WNR1	A2A7Z0;Q9R0E2;F6WNR1	Procollagen-lysine,2-oxoglutarate 5-dioxygenase 1	Plod1	>tr|A2A7Z0|A2A7Z0_MOUSE Procollagen-lysine, 2-oxoglutarate 5-dioxygenase 1 OS=Mus musculus GN=Plod1 PE=4 SV=1;>sp|Q9R0E2|PLOD1_MOUSE Procollagen-lysine,2-oxoglutarate 5-dioxygenase 1 OS=Mus musculus GN=Plod1 PE=1 SV=1;>tr|F6WNR1|F6WNR1_MOUSE Procollagen-ly	3	2	1	1	1	1	2	0	0	0	1	2	1	0	0	0	1	1	1	0	0	0	1	1	1	0	0	0	1	1	1	0	0	0	1	1	1	0	0	0	2.7	1.5	1.5	83.594	728
A2A7Z2;Q9CQU0	A2A7Z2;Q9CQU0	Thioredoxin domain-containing protein 12	Txndc12	>tr|A2A7Z2|A2A7Z2_MOUSE Thioredoxin domain containing 12 (Endoplasmic reticulum) OS=Mus musculus GN=Txndc12 PE=4 SV=1;>sp|Q9CQU0|TXD12_MOUSE Thioredoxin domain-containing protein 12 OS=Mus musculus GN=Txndc12 PE=2 SV=1	2	6	6	6	6	4	5	3	2	3	5	4	4	2	3	3	6	4	5	3	2	3	5	4	4	2	3	3	6	4	5	3	2	3	5	4	4	2	3	3	48.8	48.8	48.8	19.048	170
A2A7Z4;Q9CQH7	A2A7Z4;Q9CQH7	Transcription factor BTF3 homolog 4	Btf3l4	>tr|A2A7Z4|A2A7Z4_MOUSE Basic transcription factor 3-like 4 OS=Mus musculus GN=Btf3l4 PE=2 SV=1;>sp|Q9CQH7|BT3L4_MOUSE Transcription factor BTF3 homolog 4 OS=Mus musculus GN=Btf3l4 PE=2 SV=1	2	6	4	4	4	5	5	2	3	2	5	6	5	3	2	3	3	4	3	1	2	1	3	4	4	2	1	2	3	4	3	1	2	1	3	4	4	2	1	2	55.7	42.4	42.4	17.27	158
A2A837;Q542V3;E9Q4U8;Q8VE97	A2A837;Q542V3;E9Q4U8;Q8VE97	Serine/arginine-rich splicing factor 4	Srsf4	>tr|A2A837|A2A837_MOUSE Serine/arginine-rich-splicing factor 4 OS=Mus musculus GN=Srsf4 PE=4 SV=1;>tr|Q542V3|Q542V3_MOUSE Serine/arginine-rich-splicing factor 4 OS=Mus musculus GN=Srsf4 PE=2 SV=1;>tr|E9Q4U8|E9Q4U8_MOUSE Serine/arginine-rich-splicing factor	4	10	7	7	8	8	9	2	4	5	9	8	10	4	2	1	5	5	6	1	2	2	6	5	7	2	1	0	5	5	6	1	2	2	6	5	7	2	1	0	21.8	20.4	20.4	56.455	496
A2A841;P48193;E9PWN6;A2A840;P48193-2;A2A842;A2A838;A2A839;A2AD32;E9Q6Q1;F6S4K9;F7BUB8;E9PWN5;F7CR30;Q3V048	A2A841;P48193;E9PWN6;A2A840;P48193-2;A2A842;A2A838;A2A839;A2AD32;E9Q6Q1	Protein 4.1	Epb4.1;Epb41	>tr|A2A841|A2A841_MOUSE Erythrocyte protein band 4.1 OS=Mus musculus GN=Epb4.1 PE=4 SV=1;>sp|P48193|41_MOUSE Protein 4.1 OS=Mus musculus GN=Epb41 PE=1 SV=2;>tr|E9PWN6|E9PWN6_MOUSE Protein Epb4.1 OS=Mus musculus GN=Epb4.1 PE=4 SV=1;>tr|A2A840|A2A840_MOUSE E	15	19	16	15	15	10	14	11	8	11	12	14	11	6	10	11	13	8	12	10	7	10	10	12	8	5	8	9	12	8	11	9	6	9	9	12	7	4	8	8	28.4	25.2	23.5	97.239	869
A2A846;Q9DCS3;A2A845	A2A846;Q9DCS3	Trans-2-enoyl-CoA reductase, mitochondrial	Mecr	>tr|A2A846|A2A846_MOUSE Mitochondrial trans-2-enoyl-CoA reductase OS=Mus musculus GN=Mecr PE=4 SV=1;>sp|Q9DCS3|MECR_MOUSE Trans-2-enoyl-CoA reductase, mitochondrial OS=Mus musculus GN=Mecr PE=2 SV=2	3	11	11	11	8	8	8	3	2	4	9	7	9	3	3	3	8	8	8	3	2	4	9	7	9	3	3	3	8	8	8	3	2	4	9	7	9	3	3	3	44	44	44	40.342	373
A2A852;P02301;P84244;F8WI35;E0CZ27;E9PZA5;E0CYR7	A2A852;P02301;P84244;F8WI35;E0CZ27	Histone H3;Histone H3.3C;Histone H3.3	H3f3a;H3f3c	>tr|A2A852|A2A852_MOUSE Histone H3 OS=Mus musculus GN=H3f3a PE=3 SV=1;>sp|P02301|H3C_MOUSE Histone H3.3C OS=Mus musculus GN=H3f3c PE=1 SV=3;>sp|P84244|H33_MOUSE Histone H3.3 OS=Mus musculus GN=H3f3a PE=1 SV=2;>tr|F8WI35|F8WI35_MOUSE Histone H3 OS=Mus muscu	7	16	1	0	14	13	14	10	8	11	16	13	13	11	11	12	0	0	0	0	0	0	1	0	0	0	1	1	0	0	0	0	0	0	0	0	0	0	0	0	69.1	26.5	0	15.328	136
A2A861;Q8C0E3-2;Q8C0E3	A2A861;Q8C0E3-2;Q8C0E3	Tripartite motif-containing protein 47	Trim47	>tr|A2A861|A2A861_MOUSE Tripartite motif protein 47 OS=Mus musculus GN=Trim47 PE=4 SV=1;>sp|Q8C0E3-2|TRI47_MOUSE Isoform 2 of Tripartite motif-containing protein 47 OS=Mus musculus GN=Trim47;>sp|Q8C0E3|TRI47_MOUSE Tripartite motif-containing protein 47 OS=	3	7	7	7	4	5	5	2	0	2	5	4	4	3	3	3	4	5	5	2	0	2	5	4	4	3	3	3	4	5	5	2	0	2	5	4	4	3	3	3	14.2	14.2	14.2	69.983	642
A2A863	A2A863	Integrin beta-4	Itgb4	>sp|A2A863|ITB4_MOUSE Integrin beta-4 OS=Mus musculus GN=Itgb4 PE=2 SV=1	1	81	1	1	47	51	56	55	56	55	41	43	44	65	66	68	0	0	1	0	0	0	0	0	1	0	1	0	0	0	1	0	0	0	0	0	1	0	1	0	53.7	0.7	0.7	201.65	1818
A2A863-2;A2A863-3	A2A863-2;A2A863-3			>sp|A2A863-2|ITB4_MOUSE Isoform 2 of Integrin beta-4 OS=Mus musculus GN=Itgb4;>sp|A2A863-3|ITB4_MOUSE Isoform 3 of Integrin beta-4 OS=Mus musculus GN=Itgb4	2	82	82	0	48	53	56	57	58	57	42	44	44	65	67	68	48	53	56	57	58	57	42	44	44	65	67	68	0	0	0	0	0	0	0	0	0	0	0	0	56.2	56.2	0	194.75	1753
A2A864	A2A864	Integrin beta	Itgb4	>tr|A2A864|A2A864_MOUSE Integrin beta OS=Mus musculus GN=Itgb4 PE=3 SV=1	1	79	1	1	46	50	54	55	56	57	41	41	43	63	65	66	1	1	1	1	1	1	1	1	1	1	1	1	1	1	1	1	1	1	1	1	1	1	1	1	52.7	0.6	0.6	199.86	1802
A2A882;Q9R1P3	A2A882;Q9R1P3	Proteasome subunit beta type;Proteasome subunit beta type-2	Psmb2	>tr|A2A882|A2A882_MOUSE Proteasome subunit beta type OS=Mus musculus GN=Psmb2 PE=3 SV=1;>sp|Q9R1P3|PSB2_MOUSE Proteasome subunit beta type-2 OS=Mus musculus GN=Psmb2 PE=1 SV=1	2	11	11	11	6	7	7	9	7	8	8	10	9	10	10	9	6	7	7	9	7	8	8	10	9	10	10	9	6	7	7	9	7	8	8	10	9	10	10	9	62.7	62.7	62.7	22.906	201
A2A895;P63024	A2A895;P63024	Vesicle-associated membrane protein 3	Vamp3	>tr|A2A895|A2A895_MOUSE Vesicle-associated membrane protein 3 OS=Mus musculus GN=Vamp3 PE=4 SV=1;>sp|P63024|VAMP3_MOUSE Vesicle-associated membrane protein 3 OS=Mus musculus GN=Vamp3 PE=1 SV=1	2	7	7	3	6	5	6	6	6	6	6	4	6	5	4	5	6	5	6	6	6	6	6	4	6	5	4	5	3	2	3	3	3	3	3	2	3	3	2	3	67	67	36.9	11.48	103
A2A8L5;F6S1X8;F6Y3V0	A2A8L5;F6S1X8;F6Y3V0	Receptor-type tyrosine-protein phosphatase F	Ptprf	>sp|A2A8L5|PTPRF_MOUSE Receptor-type tyrosine-protein phosphatase F OS=Mus musculus GN=Ptprf PE=1 SV=1;>tr|F6S1X8|F6S1X8_MOUSE Receptor-type tyrosine-protein phosphatase F (Fragment) OS=Mus musculus GN=Ptprf PE=4 SV=1;>tr|F6Y3V0|F6Y3V0_MOUSE Receptor-type	3	35	35	32	17	18	20	25	19	18	18	12	16	18	22	20	17	18	20	25	19	18	18	12	16	18	22	20	16	17	19	23	18	18	16	11	14	16	20	18	26.2	26.2	24.1	211.49	1898
A2A8M5;P28231	A2A8M5;P28231	Gap junction protein;Gap junction beta-3 protein	Gjb3	>tr|A2A8M5|A2A8M5_MOUSE Gap junction protein OS=Mus musculus GN=Gjb3 PE=3 SV=1;>sp|P28231|CXB3_MOUSE Gap junction beta-3 protein OS=Mus musculus GN=Gjb3 PE=1 SV=1	2	1	1	1	1	1	1	1	1	1	1	1	1	0	1	0	1	1	1	1	1	1	1	1	1	0	1	0	1	1	1	1	1	1	1	1	1	0	1	0	5.6	5.6	5.6	30.902	270
A2A8R0;A8Y5G5	A2A8R0;A8Y5G5		Zfyve9	>tr|A2A8R0|A2A8R0_MOUSE MCG17975 OS=Mus musculus GN=Zfyve9 PE=4 SV=1;>tr|A8Y5G5|A8Y5G5_MOUSE Protein Zfyve9 OS=Mus musculus GN=Zfyve9 PE=4 SV=1	2	2	2	2	1	1	1	0	0	0	1	1	1	0	0	0	1	1	1	0	0	0	1	1	1	0	0	0	1	1	1	0	0	0	1	1	1	0	0	0	2.4	2.4	2.4	152.42	1397
A2A8R7;B2RX14	A2A8R7;B2RX14	Terminal uridylyltransferase 4	Zcchc11	>tr|A2A8R7|A2A8R7_MOUSE Terminal uridylyltransferase 4 OS=Mus musculus GN=Zcchc11 PE=4 SV=1;>sp|B2RX14|TUT4_MOUSE Terminal uridylyltransferase 4 OS=Mus musculus GN=Zcchc11 PE=1 SV=2	2	2	1	1	0	0	2	0	0	0	1	1	1	0	0	0	0	0	1	0	0	0	0	0	0	0	0	0	0	0	1	0	0	0	0	0	0	0	0	0	1.8	1.3	1.3	185.12	1648
A2A8R9;Q8VCB1	A2A8R9;Q8VCB1	Nucleoporin NDC1	Tmem48	>tr|A2A8R9|A2A8R9_MOUSE Transmembrane protein 48 OS=Mus musculus GN=Tmem48 PE=4 SV=1;>sp|Q8VCB1|NDC1_MOUSE Nucleoporin NDC1 OS=Mus musculus GN=Tmem48 PE=2 SV=1	2	6	6	6	4	2	4	1	1	2	4	4	4	4	1	2	4	2	4	1	1	2	4	4	4	4	1	2	4	2	4	1	1	2	4	4	4	4	1	2	12	12	12	75.409	673
A2A8S4;Q91VU1;A2A8S2;A2A8S3	A2A8S4;Q91VU1;A2A8S2;A2A8S3	Protein YIPF1	Yipf1	>tr|A2A8S4|A2A8S4_MOUSE Yip1 domain family, member 1 OS=Mus musculus GN=Yipf1 PE=4 SV=1;>sp|Q91VU1|YIPF1_MOUSE Protein YIPF1 OS=Mus musculus GN=Yipf1 PE=2 SV=1;>tr|A2A8S2|A2A8S2_MOUSE Protein YIPF1 (Fragment) OS=Mus musculus GN=Yipf1 PE=4 SV=1;>tr|A2A8S3|A	4	3	3	3	3	2	3	3	3	3	3	2	2	3	3	3	3	2	3	3	3	3	3	2	2	3	3	3	3	2	3	3	3	3	3	2	2	3	3	3	13.4	13.4	13.4	34.257	306
A2A8U2;A2A8U2-3;E9Q7X5;A2A8U2-2;E9Q2H6	A2A8U2;A2A8U2-3;E9Q7X5;A2A8U2-2;E9Q2H6	Transmembrane protein 201	Tmem201	>sp|A2A8U2|TM201_MOUSE Transmembrane protein 201 OS=Mus musculus GN=Tmem201 PE=2 SV=1;>sp|A2A8U2-3|TM201_MOUSE Isoform 3 of Transmembrane protein 201 OS=Mus musculus GN=Tmem201;>tr|E9Q7X5|E9Q7X5_MOUSE Transmembrane protein 201 OS=Mus musculus GN=Tmem201 PE	5	9	9	9	2	3	3	0	0	0	5	6	6	4	3	4	2	3	3	0	0	0	5	6	6	4	3	4	2	3	3	0	0	0	5	6	6	4	3	4	19.9	19.9	19.9	72.499	664
A2A8Y4;Q9DC71	A2A8Y4;Q9DC71	28S ribosomal protein S15, mitochondrial	Mrps15	>tr|A2A8Y4|A2A8Y4_MOUSE Mitochondrial ribosomal protein S15 OS=Mus musculus GN=Mrps15 PE=3 SV=1;>sp|Q9DC71|RT15_MOUSE 28S ribosomal protein S15, mitochondrial OS=Mus musculus GN=Mrps15 PE=2 SV=2	2	9	9	9	5	5	6	3	3	5	5	6	8	2	5	3	5	5	6	3	3	5	5	6	8	2	5	3	5	5	6	3	3	5	5	6	8	2	5	3	44.6	44.6	44.6	29.463	258
A2A8Z1;E9PXZ2;F6UHR6;E9Q6C1;A2A8Z1-2;Q5FWX7;Q8VDM5;F8VQE8	A2A8Z1;E9PXZ2;F6UHR6;E9Q6C1;A2A8Z1-2;Q5FWX7;Q8VDM5	Oxysterol-binding protein-related protein 9;Oxysterol-binding protein	Osbpl9	>sp|A2A8Z1|OSBL9_MOUSE Oxysterol-binding protein-related protein 9 OS=Mus musculus GN=Osbpl9 PE=1 SV=1;>tr|E9PXZ2|E9PXZ2_MOUSE Oxysterol-binding protein OS=Mus musculus GN=Osbpl9 PE=3 SV=2;>tr|F6UHR6|F6UHR6_MOUSE Oxysterol-binding protein OS=Mus musculus G	8	15	15	15	7	7	8	7	5	7	10	8	8	10	10	6	7	7	8	7	5	7	10	8	8	10	10	6	7	7	8	7	5	7	10	8	8	10	10	6	21.2	21.2	21.2	83.108	736
A2A9B9;Q99J07;A8Y5H7;B2RXM5	A2A9B9;Q99J07;A8Y5H7		Sec14l1	>tr|A2A9B9|A2A9B9_MOUSE Protein Sec14l1 OS=Mus musculus GN=Sec14l1 PE=4 SV=1;>tr|Q99J07|Q99J07_MOUSE Protein Sec14l1 OS=Mus musculus GN=Sec14l1 PE=2 SV=1;>tr|A8Y5H7|A8Y5H7_MOUSE Protein Sec14l1 OS=Mus musculus GN=Sec14l1 PE=4 SV=1	4	7	7	7	2	2	2	2	2	2	4	3	3	3	2	2	2	2	2	2	2	2	4	3	3	3	2	2	2	2	2	2	2	2	4	3	3	3	2	2	11	11	11	81.807	719
A2A9C3;A2A9C3-2;E9Q8U2;E9Q9K7	A2A9C3;A2A9C3-2;E9Q8U2	Protein SZT2	Szt2	>sp|A2A9C3|SZT2_MOUSE Protein SZT2 OS=Mus musculus GN=Szt2 PE=1 SV=1;>sp|A2A9C3-2|SZT2_MOUSE Isoform 2 of Protein SZT2 OS=Mus musculus GN=Szt2;>tr|E9Q8U2|E9Q8U2_MOUSE Protein SZT2 OS=Mus musculus GN=Szt2 PE=4 SV=1	4	8	8	8	5	6	4	2	2	1	4	5	5	3	3	4	5	6	4	2	2	1	4	5	5	3	3	4	5	6	4	2	2	1	4	5	5	3	3	4	3.6	3.6	3.6	377.62	3431
A2A9D2;Q9JJ66	A2A9D2;Q9JJ66	Cell division cycle protein 20 homolog	Cdc20	>tr|A2A9D2|A2A9D2_MOUSE Cell division cycle 20 homolog (S. cerevisiae) OS=Mus musculus GN=Cdc20 PE=4 SV=1;>sp|Q9JJ66|CDC20_MOUSE Cell division cycle protein 20 homolog OS=Mus musculus GN=Cdc20 PE=1 SV=2	2	1	1	1	1	1	1	0	0	0	1	1	1	0	0	0	1	1	1	0	0	0	1	1	1	0	0	0	1	1	1	0	0	0	1	1	1	0	0	0	4	4	4	54.815	499
A2A9F4;A8Y5H9;A2A9F3;A2A9F2	A2A9F4;A8Y5H9;A2A9F3;A2A9F2	Uncharacterized protein C1orf172 homolog	1810019J16Rik	>sp|A2A9F4|CA172_MOUSE Uncharacterized protein C1orf172 homolog OS=Mus musculus PE=2 SV=1;>tr|A8Y5H9|A8Y5H9_MOUSE Novel protein (1810019J16Rik) OS=Mus musculus GN=1810019J16Rik PE=4 SV=1;>tr|A2A9F3|A2A9F3_MOUSE Novel protein (1810019J16Rik) (Fragment) OS=M	4	3	3	3	1	1	1	1	1	2	1	0	0	2	2	2	1	1	1	1	1	2	1	0	0	2	2	2	1	1	1	1	1	2	1	0	0	2	2	2	11.8	11.8	11.8	43.496	397
A2A9F5;O35685	A2A9F5;O35685	Nuclear migration protein nudC	Nudc	>tr|A2A9F5|A2A9F5_MOUSE MCG20813 OS=Mus musculus GN=Nudc PE=4 SV=1;>sp|O35685|NUDC_MOUSE Nuclear migration protein nudC OS=Mus musculus GN=Nudc PE=1 SV=1	2	21	21	21	16	18	17	5	4	9	16	16	18	8	8	7	16	18	17	5	4	9	16	16	18	8	8	7	16	18	17	5	4	9	16	16	18	8	8	7	65.1	65.1	65.1	38.358	332
A2A9H9;O35166;A2A9I0	A2A9H9;O35166;A2A9I0	Golgi SNAP receptor complex member 2	Gosr2	>tr|A2A9H9|A2A9H9_MOUSE Golgi SNAP receptor complex member 2 OS=Mus musculus GN=Gosr2 PE=4 SV=1;>sp|O35166|GOSR2_MOUSE Golgi SNAP receptor complex member 2 OS=Mus musculus GN=Gosr2 PE=2 SV=2;>tr|A2A9I0|A2A9I0_MOUSE Golgi SNAP receptor complex member 2 OS=M	3	6	6	6	4	4	4	4	3	3	5	5	4	6	5	5	4	4	4	4	3	3	5	5	4	6	5	5	4	4	4	4	3	3	5	5	4	6	5	5	31.1	31.1	31.1	24.725	212
A2A9K7	A2A9K7		Cnksr1	>tr|A2A9K7|A2A9K7_MOUSE Connector enhancer of kinase suppressor of Ras 1 OS=Mus musculus GN=Cnksr1 PE=4 SV=1	1	8	8	8	7	6	6	2	1	2	6	5	5	2	2	2	7	6	6	2	1	2	6	5	5	2	2	2	7	6	6	2	1	2	6	5	5	2	2	2	18.6	18.6	18.6	77.484	700
A2A9P5;P24788;A2A9P6;P24788-2	A2A9P5;P24788;A2A9P6;P24788-2	Cyclin-dependent kinase 11	Cdk11b;Cdk11	>tr|A2A9P5|A2A9P5_MOUSE Cell division cycle 2-like 1 OS=Mus musculus GN=Cdk11b PE=4 SV=1;>sp|P24788|CD11B_MOUSE Cyclin-dependent kinase 11B OS=Mus musculus GN=Cdk11b PE=1 SV=2;>tr|A2A9P6|A2A9P6_MOUSE Cell division cycle 2-like 1 OS=Mus musculus GN=Cdk11b P	4	15	15	15	7	8	8	7	3	6	9	8	11	7	9	7	7	8	8	7	3	6	9	8	11	7	9	7	7	8	8	7	3	6	9	8	11	7	9	7	26	26	26	91.512	784
A2A9Q2;A2A9Q1;Q8BHG1;A6PWC3;Q3V3G9	A2A9Q2;A2A9Q1;Q8BHG1;A6PWC3	Nardilysin	Nrd1	>tr|A2A9Q2|A2A9Q2_MOUSE Nardilysin OS=Mus musculus GN=Nrd1 PE=3 SV=1;>tr|A2A9Q1|A2A9Q1_MOUSE Nardilysin, N-arginine dibasic convertase, NRD convertase 1 OS=Mus musculus GN=Nrd1 PE=3 SV=1;>sp|Q8BHG1|NRDC_MOUSE Nardilysin OS=Mus musculus GN=Nrd1 PE=1 SV=1;>t	5	27	27	27	21	22	21	7	6	9	21	19	20	12	12	8	21	22	21	7	6	9	21	19	20	12	12	8	21	22	21	7	6	9	21	19	20	12	12	8	24.8	24.8	24.8	140.62	1229
A2A9T8;Q9D0Q7;F6TMQ3;F6QAU7	A2A9T8;Q9D0Q7;F6TMQ3	39S ribosomal protein L45, mitochondrial	Mrpl45	>tr|A2A9T8|A2A9T8_MOUSE Mitochondrial ribosomal protein L45 OS=Mus musculus GN=Mrpl45 PE=4 SV=1;>sp|Q9D0Q7|RM45_MOUSE 39S ribosomal protein L45, mitochondrial OS=Mus musculus GN=Mrpl45 PE=2 SV=1;>tr|F6TMQ3|F6TMQ3_MOUSE 39S ribosomal protein L45, mitochondr	4	8	8	8	6	6	8	4	4	5	6	7	6	4	6	5	6	6	8	4	4	5	6	7	6	4	6	5	6	6	8	4	4	5	6	7	6	4	6	5	33	33	33	35.41	306
A2A9W4;Q80X85	A2A9W4;Q80X85	28S ribosomal protein S7, mitochondrial	Mrps7	>tr|A2A9W4|A2A9W4_MOUSE Mitchondrial ribosomal protein S7 OS=Mus musculus GN=Mrps7 PE=4 SV=1;>sp|Q80X85|RT07_MOUSE 28S ribosomal protein S7, mitochondrial OS=Mus musculus GN=Mrps7 PE=2 SV=1	2	11	11	11	6	10	9	6	4	5	10	11	9	8	9	9	6	10	9	6	4	5	10	11	9	8	9	9	6	10	9	6	4	5	10	11	9	8	9	9	57	57	57	28.062	242
A2A9X3;P97825	A2A9X3;P97825	Hematological and neurological expressed 1 protein	Hn1	>tr|A2A9X3|A2A9X3_MOUSE Hematological and neurological expressed sequence 1 OS=Mus musculus GN=Hn1 PE=4 SV=1;>sp|P97825|HN1_MOUSE Hematological and neurological expressed 1 protein OS=Mus musculus GN=Hn1 PE=1 SV=3	2	6	6	6	5	4	5	0	0	1	4	4	5	0	0	0	5	4	5	0	0	1	4	4	5	0	0	0	5	4	5	0	0	1	4	4	5	0	0	0	74	74	74	16.08	154
A2A9X6;Q9JM14;A2A9X5	A2A9X6;Q9JM14;A2A9X5	5(3)-deoxyribonucleotidase, cytosolic type	Nt5c	>tr|A2A9X6|A2A9X6_MOUSE 5,3-nucleotidase, cytosolic OS=Mus musculus GN=Nt5c PE=4 SV=1;>sp|Q9JM14|NT5C_MOUSE 5(3)-deoxyribonucleotidase, cytosolic type OS=Mus musculus GN=Nt5c PE=1 SV=1;>tr|A2A9X5|A2A9X5_MOUSE 5(3)-deoxyribonucleotidase, cytosolic typ	3	8	8	8	5	4	6	0	0	3	6	6	7	2	1	1	5	4	6	0	0	3	6	6	7	2	1	1	5	4	6	0	0	3	6	6	7	2	1	1	47.5	47.5	47.5	23.076	200
A2AA35;O09051;Q9QUQ3	A2AA35;O09051;Q9QUQ3	Guanylate cyclase activator 2B;Uroguanylin	Guca2b	>tr|A2AA35|A2AA35_MOUSE Guanylate cyclase activator 2b (Retina) OS=Mus musculus GN=Guca2b PE=4 SV=1;>sp|O09051|GUC2B_MOUSE Guanylate cyclase activator 2B OS=Mus musculus GN=Guca2b PE=2 SV=2;>tr|Q9QUQ3|Q9QUQ3_MOUSE Guanylate cyclase activator 2b (Retina) OS	3	4	4	4	2	1	3	1	0	1	2	2	2	1	1	1	2	1	3	1	0	1	2	2	2	1	1	1	2	1	3	1	0	1	2	2	2	1	1	1	40.8	40.8	40.8	14.029	130
A2AA49;P27601;Q9D034	A2AA49;P27601	Guanine nucleotide-binding protein subunit alpha-13	Gna13	>tr|A2AA49|A2AA49_MOUSE Guanine nucleotide binding protein, alpha 13 OS=Mus musculus GN=Gna13 PE=4 SV=1;>sp|P27601|GNA13_MOUSE Guanine nucleotide-binding protein subunit alpha-13 OS=Mus musculus GN=Gna13 PE=1 SV=1	3	26	25	23	21	21	20	22	21	20	21	21	21	23	25	23	20	20	19	21	20	19	20	20	20	22	24	22	18	18	17	19	18	17	18	18	18	20	22	20	72.1	72.1	66	44.054	377
A2AA60;Q6ZQF7;Q6ZQF7-2;A2AA59	A2AA60;Q6ZQF7;Q6ZQF7-2;A2AA59	Protein Jade-2	Phf15	>tr|A2AA60|A2AA60_MOUSE PHD finger protein 15 OS=Mus musculus GN=Phf15 PE=4 SV=1;>sp|Q6ZQF7|JADE2_MOUSE Protein Jade-2 OS=Mus musculus GN=Phf15 PE=2 SV=2;>sp|Q6ZQF7-2|JADE2_MOUSE Isoform 2 of Protein Jade-2 OS=Mus musculus GN=Phf15;>tr|A2AA59|A2AA59_MOUSE	4	1	1	1	1	0	1	0	0	0	1	1	1	0	0	0	1	0	1	0	0	0	1	1	1	0	0	0	1	0	1	0	0	0	1	1	1	0	0	0	1.8	1.8	1.8	92.173	829
A2AA61;Q9CRB2	A2AA61;Q9CRB2	H/ACA ribonucleoprotein complex subunit 2	Nhp2	>tr|A2AA61|A2AA61_MOUSE Nucleolar protein family A, member 2 OS=Mus musculus GN=Nhp2 PE=4 SV=1;>sp|Q9CRB2|NHP2_MOUSE H/ACA ribonucleoprotein complex subunit 2 OS=Mus musculus GN=Nhp2 PE=2 SV=1	2	5	5	5	4	4	4	0	0	0	5	5	5	0	0	0	4	4	4	0	0	0	5	5	5	0	0	0	4	4	4	0	0	0	5	5	5	0	0	0	34	34	34	17.247	153
A2AA71;F7C3S0;A2AA72	A2AA71		Sec24a	>tr|A2AA71|A2AA71_MOUSE Protein transport protein Sec24A OS=Mus musculus GN=Sec24a PE=4 SV=1	3	24	24	1	15	14	17	10	9	10	18	16	18	16	19	20	15	14	17	10	9	10	18	16	18	16	19	20	0	0	0	1	1	1	0	0	0	1	1	1	29.8	29.8	1.3	118.65	1089
A2AA77;Q9CQA3	A2AA77;Q9CQA3	Succinate dehydrogenase [ubiquinone] iron-sulfur subunit, mitochondrial	Sdhb	>tr|A2AA77|A2AA77_MOUSE Succinate dehydrogenase complex, subunit B, iron sulfur (Ip) OS=Mus musculus GN=Sdhb PE=4 SV=1;>sp|Q9CQA3|DHSB_MOUSE Succinate dehydrogenase [ubiquinone] iron-sulfur subunit, mitochondrial OS=Mus musculus GN=Sdhb PE=1 SV=1	2	23	23	23	18	20	21	17	15	18	20	20	20	21	21	21	18	20	21	17	15	18	20	20	20	21	21	21	18	20	21	17	15	18	20	20	20	21	21	21	67.7	67.7	67.7	31.814	282
A2AA82;Q9D1J1;D6RFU1;F6RCM5	A2AA82;Q9D1J1;D6RFU1	Adaptin ear-binding coat-associated protein 2	Necap2	>tr|A2AA82|A2AA82_MOUSE NECAP endocytosis associated 2 OS=Mus musculus GN=Necap2 PE=4 SV=1;>sp|Q9D1J1|NECP2_MOUSE Adaptin ear-binding coat-associated protein 2 OS=Mus musculus GN=Necap2 PE=1 SV=1;>tr|D6RFU1|D6RFU1_MOUSE Adaptin ear-binding coat-associated	4	4	4	4	1	1	3	1	1	0	3	1	3	1	1	1	1	1	3	1	1	0	3	1	3	1	1	1	1	1	3	1	1	0	3	1	3	1	1	1	28.6	28.6	28.6	28.598	266
A2AAE1-4;F6RPM4;F6YAT5;A2AB97;E9Q5C4;E9Q7H1	A2AAE1-4			>sp|A2AAE1-4|K1109_MOUSE Isoform 4 of Uncharacterized protein KIAA1109 OS=Mus musculus GN=Kiaa1109	6	16	16	1	4	7	5	9	8	9	6	4	3	7	6	6	4	7	5	9	8	9	6	4	3	7	6	6	0	0	0	1	1	1	0	0	0	1	1	0	4.9	4.9	0.3	510.34	4618
A2AAV4;Q8BYA0;B1ATU0;F6UI15	A2AAV4;Q8BYA0	Tubulin-specific chaperone D	Tbcd	>tr|A2AAV4|A2AAV4_MOUSE Tubulin-specific chaperone d OS=Mus musculus GN=Tbcd PE=4 SV=1;>sp|Q8BYA0|TBCD_MOUSE Tubulin-specific chaperone D OS=Mus musculus GN=Tbcd PE=2 SV=1	4	20	20	19	11	12	12	10	7	9	11	9	14	9	11	11	11	12	12	10	7	9	11	9	14	9	11	11	11	12	12	10	7	9	11	8	14	9	11	11	21	21	20.4	133.32	1196
A2AB59;A2AKN5;Q8BT62	A2AB59	Rho GTPase-activating protein 27	Arhgap27	>sp|A2AB59|RHG27_MOUSE Rho GTPase-activating protein 27 OS=Mus musculus GN=Arhgap27 PE=1 SV=1	3	12	12	2	6	7	10	4	3	3	10	9	9	3	3	3	6	7	10	4	3	3	10	9	9	3	3	3	2	1	1	2	1	0	1	1	1	0	0	0	18	18	3.2	97.047	869
A2AB59-2	A2AB59-2			>sp|A2AB59-2|RHG27_MOUSE Isoform 2 of Rho GTPase-activating protein 27 OS=Mus musculus GN=Arhgap27	1	11	1	1	5	7	10	3	3	3	10	9	8	3	3	3	1	1	1	1	1	0	1	1	0	0	0	0	1	1	1	1	1	0	1	1	0	0	0	0	21.5	2.4	2.4	75.801	670
A2AB61;Q9JL26;A2AB60;Q9JL26-2	A2AB61;Q9JL26;A2AB60;Q9JL26-2	Formin-like protein 1	Fmnl1	>tr|A2AB61|A2AB61_MOUSE Formin-like 1 OS=Mus musculus GN=Fmnl1 PE=4 SV=1;>sp|Q9JL26|FMNL_MOUSE Formin-like protein 1 OS=Mus musculus GN=Fmnl1 PE=1 SV=1;>tr|A2AB60|A2AB60_MOUSE Formin-like 1 OS=Mus musculus GN=Fmnl1 PE=4 SV=1;>sp|Q9JL26-2|FMNL_MOUSE Isoform	4	6	6	6	1	1	2	2	1	2	2	2	4	0	1	1	1	1	2	2	1	2	2	2	4	0	1	1	1	1	2	2	1	2	2	2	4	0	1	1	7.7	7.7	7.7	122.06	1094
A2AB77;Q8CGP0;Q9D2U9	A2AB77;Q8CGP0;Q9D2U9	Histone H2B;Histone H2B type 3-B;Histone H2B type 3-A	Hist3h2ba;Hist3h2bb	>tr|A2AB77|A2AB77_MOUSE Histone H2B OS=Mus musculus GN=Hist3h2ba PE=3 SV=1;>sp|Q8CGP0|H2B3B_MOUSE Histone H2B type 3-B OS=Mus musculus GN=Hist3h2bb PE=1 SV=3;>sp|Q9D2U9|H2B3A_MOUSE Histone H2B type 3-A OS=Mus musculus GN=Hist3h2ba PE=1 SV=3	3	11	2	1	8	9	8	6	5	5	6	7	8	6	7	6	1	2	2	0	0	1	2	2	2	1	1	1	0	1	1	0	0	0	1	1	1	0	0	0	68.3	25.4	18.3	13.994	126
A2AB79;Q8BFU2;Q8R1M2	A2AB79;Q8BFU2;Q8R1M2	Histone H2A;Histone H2A type 3;Histone H2A.J	Hist3h2a;H2afj	>tr|A2AB79|A2AB79_MOUSE Histone H2A OS=Mus musculus GN=Hist3h2a PE=2 SV=1;>sp|Q8BFU2|H2A3_MOUSE Histone H2A type 3 OS=Mus musculus GN=Hist3h2a PE=1 SV=3;>sp|Q8R1M2|H2AJ_MOUSE Histone H2A.J OS=Mus musculus GN=H2afj PE=2 SV=1	3	12	1	0	7	9	9	7	6	8	9	8	9	9	11	9	0	1	1	0	0	0	1	1	1	0	1	0	0	0	0	0	0	0	0	0	0	0	0	0	72.3	16.2	0	14.121	130
A2ABG3;Q9QXV1	A2ABG3;Q9QXV1	Chromobox protein homolog 8	Cbx8	>tr|A2ABG3|A2ABG3_MOUSE Chromobox homolog 8 (Drosophila Pc class) OS=Mus musculus GN=Cbx8 PE=4 SV=1;>sp|Q9QXV1|CBX8_MOUSE Chromobox protein homolog 8 OS=Mus musculus GN=Cbx8 PE=1 SV=1	2	1	1	1	0	0	1	0	0	0	0	0	0	0	0	0	0	0	1	0	0	0	0	0	0	0	0	0	0	0	1	0	0	0	0	0	0	0	0	0	3.3	3.3	3.3	39.859	362
A2ABV5;A2BDP0;A2ABV5-2;A2BDN7;A2ABV5-3;A2ABV5-4	A2ABV5;A2BDP0	Mediator of RNA polymerase II transcription subunit 14	Med14	>sp|A2ABV5|MED14_MOUSE Mediator of RNA polymerase II transcription subunit 14 OS=Mus musculus GN=Med14 PE=1 SV=1;>tr|A2BDP0|A2BDP0_MOUSE Mediator complex subunit 14 OS=Mus musculus GN=Med14 PE=4 SV=1	6	14	14	14	5	6	6	2	3	4	7	5	10	2	2	4	5	6	6	2	3	4	7	5	10	2	2	4	5	6	6	2	3	4	7	5	10	2	2	4	16.5	16.5	16.5	160.96	1459
A2ABW5;Q8BX94	A2ABW5;Q8BX94	Oxysterol-binding protein;Oxysterol-binding protein-related protein 2	Osbpl2	>tr|A2ABW5|A2ABW5_MOUSE Oxysterol-binding protein OS=Mus musculus GN=Osbpl2 PE=3 SV=1;>sp|Q8BX94|OSBL2_MOUSE Oxysterol-binding protein-related protein 2 OS=Mus musculus GN=Osbpl2 PE=2 SV=1	2	2	2	2	0	0	0	0	0	0	1	1	1	1	1	0	0	0	0	0	0	0	1	1	1	1	1	0	0	0	0	0	0	0	1	1	1	1	1	0	4.8	4.8	4.8	55.384	484
A2ABW8;Q9CQR2	A2ABW8;Q9CQR2	40S ribosomal protein S21	Rps21	>tr|A2ABW8|A2ABW8_MOUSE 40S ribosomal protein S21 OS=Mus musculus GN=Rps21 PE=3 SV=1;>sp|Q9CQR2|RS21_MOUSE 40S ribosomal protein S21 OS=Mus musculus GN=Rps21 PE=2 SV=1	2	6	6	6	5	5	5	1	2	0	5	5	6	2	2	2	5	5	5	1	2	0	5	5	6	2	2	2	5	5	5	1	2	0	5	5	6	2	2	2	89.2	89.2	89.2	9.1413	83
A2ABW9	A2ABW9		Cables2	>tr|A2ABW9|A2ABW9_MOUSE CDK5 and ABL1 enzyme substrate 2 OS=Mus musculus GN=Cables2 PE=3 SV=1	1	1	1	1	1	1	0	1	1	1	1	1	0	0	0	1	1	1	0	1	1	1	1	1	0	0	0	1	1	1	0	1	1	1	1	1	0	0	0	1	3.6	3.6	3.6	52.081	476
A2AC15;Q91X52;A2AC16	A2AC15;Q91X52;A2AC16	L-xylulose reductase	Dcxr	>tr|A2AC15|A2AC15_MOUSE Dicarbonyl L-xylulose reductase OS=Mus musculus GN=Dcxr PE=4 SV=1;>sp|Q91X52|DCXR_MOUSE L-xylulose reductase OS=Mus musculus GN=Dcxr PE=2 SV=2;>tr|A2AC16|A2AC16_MOUSE Dicarbonyl L-xylulose reductase OS=Mus musculus GN=Dcxr PE=4 SV=1	3	2	2	2	2	2	2	1	0	1	2	2	2	1	1	1	2	2	2	1	0	1	2	2	2	1	1	1	2	2	2	1	0	1	2	2	2	1	1	1	11.1	11.1	11.1	25.746	244
A2AC28;P70245;A2AC29	A2AC28;P70245;A2AC29	3-beta-hydroxysteroid-Delta(8),Delta(7)-isomerase	Ebp	>tr|A2AC28|A2AC28_MOUSE Phenylalkylamine Ca2+ antagonist (Emopamil) binding protein OS=Mus musculus GN=Ebp PE=4 SV=1;>sp|P70245|EBP_MOUSE 3-beta-hydroxysteroid-Delta(8),Delta(7)-isomerase OS=Mus musculus GN=Ebp PE=1 SV=3;>tr|A2AC29|A2AC29_MOUSE 3-beta-hydr	3	4	4	4	4	4	4	4	3	4	4	4	4	4	4	4	4	4	4	4	3	4	4	4	4	4	4	4	4	4	4	4	3	4	4	4	4	4	4	4	16.5	16.5	16.5	26.215	230
A2AC36;Q99LG1	A2AC36;Q99LG1	Transmembrane protein 51	Tmem51	>tr|A2AC36|A2AC36_MOUSE Transmembrane protein 51 OS=Mus musculus GN=Tmem51 PE=4 SV=1;>sp|Q99LG1|TMM51_MOUSE Transmembrane protein 51 OS=Mus musculus GN=Tmem51 PE=1 SV=1	2	7	7	7	2	2	3	7	7	7	2	3	3	7	7	7	2	2	3	7	7	7	2	3	3	7	7	7	2	2	3	7	7	7	2	3	3	7	7	7	48.2	48.2	48.2	27.398	249
A2ACC9;Q80US4;Q80US4-3	A2ACC9;Q80US4;Q80US4-3	Actin-related protein 5	Actr5	>tr|A2ACC9|A2ACC9_MOUSE ARP5 actin-related protein 5 homolog (Yeast) OS=Mus musculus GN=Actr5 PE=3 SV=1;>sp|Q80US4|ARP5_MOUSE Actin-related protein 5 OS=Mus musculus GN=Actr5 PE=2 SV=2;>sp|Q80US4-3|ARP5_MOUSE Isoform 3 of Actin-related protein 5 OS=Mus mus	3	5	5	5	5	4	5	2	2	2	3	3	3	1	2	2	5	4	5	2	2	2	3	3	3	1	2	2	5	4	5	2	2	2	3	3	3	1	2	2	12.8	12.8	12.8	68.158	608
A2ACD3;Q9CWL8	A2ACD3;Q9CWL8	Beta-catenin-like protein 1	Ctnnbl1	>tr|A2ACD3|A2ACD3_MOUSE Catenin, beta like 1 OS=Mus musculus GN=Ctnnbl1 PE=4 SV=1;>sp|Q9CWL8|CTBL1_MOUSE Beta-catenin-like protein 1 OS=Mus musculus GN=Ctnnbl1 PE=1 SV=1	2	24	24	24	16	17	19	2	2	2	21	20	22	6	3	5	16	17	19	2	2	2	21	20	22	6	3	5	16	17	19	2	2	2	21	20	22	6	3	5	41	41	41	64.979	563
A2ACH4;O70274	A2ACH4;O70274	Protein tyrosine phosphatase type IVA 2	Ptp4a2	>tr|A2ACH4|A2ACH4_MOUSE Protein tyrosine phosphatase 4a2 OS=Mus musculus GN=Ptp4a2 PE=4 SV=1;>sp|O70274|TP4A2_MOUSE Protein tyrosine phosphatase type IVA 2 OS=Mus musculus GN=Ptp4a2 PE=1 SV=1	2	9	4	4	5	5	6	6	6	7	5	6	4	7	7	7	1	1	1	1	1	2	1	2	1	3	3	3	1	1	1	1	1	2	1	2	1	3	3	3	65.3	54.5	54.5	19.127	167
A2ACJ2	A2ACJ2	Fanconi anemia-associated protein of 100 kDa	Faap100	>sp|A2ACJ2|FP100_MOUSE Fanconi anemia-associated protein of 100 kDa OS=Mus musculus GN=Faap100 PE=2 SV=1	1	1	1	1	0	1	1	0	1	0	1	1	1	1	1	1	0	1	1	0	1	0	1	1	1	1	1	1	0	1	1	0	1	0	1	1	1	1	1	1	1.6	1.6	1.6	94.28	879
A2ACM0;Q8K4Q0;Q8K4Q0-2;Q8K4Q0-3;E9PXZ5;F7BQS0;Q8K4Q0-5;F7CN67;Q8K4Q0-4;E9PZN9;F6U5L3;F7B6I3	A2ACM0;Q8K4Q0;Q8K4Q0-2	Regulatory-associated protein of mTOR	Rptor	>tr|A2ACM0|A2ACM0_MOUSE Novel protein containing six WD40 domains at C-terminus OS=Mus musculus GN=Rptor PE=4 SV=1;>sp|Q8K4Q0|RPTOR_MOUSE Regulatory-associated protein of mTOR OS=Mus musculus GN=Rptor PE=1 SV=1;>sp|Q8K4Q0-2|RPTOR_MOUSE Isoform 2 of Regulat	12	15	15	15	7	7	7	10	9	7	4	5	9	9	10	8	7	7	7	10	9	7	4	5	9	9	10	8	7	7	7	10	9	7	4	5	9	9	10	8	16.1	16.1	16.1	149.5	1335
A2ACP1;A2ACP1-2	A2ACP1;A2ACP1-2	Tetratricopeptide repeat protein 39A	Ttc39a	>sp|A2ACP1|TT39A_MOUSE Tetratricopeptide repeat protein 39A OS=Mus musculus GN=Ttc39a PE=2 SV=1;>sp|A2ACP1-2|TT39A_MOUSE Isoform 2 of Tetratricopeptide repeat protein 39A OS=Mus musculus GN=Ttc39a	2	2	2	2	2	2	2	1	0	1	2	1	2	1	1	1	2	2	2	1	0	1	2	1	2	1	1	1	2	2	2	1	0	1	2	1	2	1	1	1	4	4	4	66.126	578
A2AD03;Q9QXG2;Q3UR39;Q9QZD5	A2AD03;Q9QXG2;Q3UR39	Rab proteins geranylgeranyltransferase component A 1	Chm	>tr|A2AD03|A2AD03_MOUSE Choroidermia OS=Mus musculus GN=Chm PE=4 SV=1;>sp|Q9QXG2|RAE1_MOUSE Rab proteins geranylgeranyltransferase component A 1 OS=Mus musculus GN=Chm PE=2 SV=1;>tr|Q3UR39|Q3UR39_MOUSE Choroidermia OS=Mus musculus GN=Chm PE=2 SV=1	4	10	10	10	8	6	4	2	3	1	4	5	5	0	1	1	8	6	4	2	3	1	4	5	5	0	1	1	8	6	4	2	3	1	4	5	5	0	1	1	18.4	18.4	18.4	73.663	662
A2AD86;Q8BU31	A2AD86;Q8BU31	Ras-related protein Rap-2c	Rap2c	>tr|A2AD86|A2AD86_MOUSE RAP2C, member of RAS oncogene family OS=Mus musculus GN=Rap2c PE=4 SV=1;>sp|Q8BU31|RAP2C_MOUSE Ras-related protein Rap-2c OS=Mus musculus GN=Rap2c PE=1 SV=1	2	10	10	6	5	6	6	6	5	6	6	5	5	8	6	6	5	6	6	6	5	6	6	5	5	8	6	6	3	5	4	4	3	4	5	4	3	5	5	5	54.1	54.1	33.9	20.745	183
A2AD89;Q925I1;F8WI53;Q925I1-2;H3BKI6;H3BK90;H3BKA4;H3BKE0	A2AD89;Q925I1;F8WI53;Q925I1-2	ATPase family AAA domain-containing protein 3	Atad3a;Atad3	>tr|A2AD89|A2AD89_MOUSE ATPase family, AAA domain containing 3A OS=Mus musculus GN=Atad3a PE=4 SV=1;>sp|Q925I1|ATAD3_MOUSE ATPase family AAA domain-containing protein 3 OS=Mus musculus GN=Atad3 PE=1 SV=1;>tr|F8WI53|F8WI53_MOUSE Protein Atad3a OS=Mus muscul	8	30	30	30	22	22	26	21	20	22	28	25	27	23	24	24	22	22	26	21	20	22	28	25	27	23	24	24	22	22	26	21	20	22	28	25	27	23	24	24	63.5	63.5	63.5	66.741	591
A2AD94;Q9CQL4	A2AD94;Q9CQL4	39S ribosomal protein L20, mitochondrial	Mrpl20	>tr|A2AD94|A2AD94_MOUSE Mitochondrial ribosomal protein L20 OS=Mus musculus GN=Mrpl20 PE=3 SV=1;>sp|Q9CQL4|RM20_MOUSE 39S ribosomal protein L20, mitochondrial OS=Mus musculus GN=Mrpl20 PE=1 SV=1	2	5	5	5	1	3	2	3	2	3	3	2	3	3	4	4	1	3	2	3	2	3	3	2	3	3	4	4	1	3	2	3	2	3	3	2	3	3	4	4	33.6	33.6	33.6	17.595	149
A2ADA4;Q9CWS4;A8Y5J3;D6RH69	A2ADA4;Q9CWS4;A8Y5J3	Integrator complex subunit 11	Cpsf3l	>tr|A2ADA4|A2ADA4_MOUSE Cleavage and polyadenylation specific factor 3-like OS=Mus musculus GN=Cpsf3l PE=4 SV=1;>sp|Q9CWS4|INT11_MOUSE Integrator complex subunit 11 OS=Mus musculus GN=Cpsf3l PE=2 SV=1;>tr|A8Y5J3|A8Y5J3_MOUSE Cleavage and polyadenylation sp	4	3	3	3	1	1	2	1	1	1	3	3	3	1	3	1	1	1	2	1	1	1	3	3	3	1	3	1	1	1	2	1	1	1	3	3	3	1	3	1	5.2	5.2	5.2	67.843	600
A2ADA5;E9Q5J0;A2ADA5-2;A2ADA5-3	A2ADA5;E9Q5J0;A2ADA5-2;A2ADA5-3	tRNA pseudouridine synthase-like 1;Pseudouridine synthase	Pusl1	>sp|A2ADA5|PUSL1_MOUSE tRNA pseudouridine synthase-like 1 OS=Mus musculus GN=Pusl1 PE=2 SV=1;>tr|E9Q5J0|E9Q5J0_MOUSE Pseudouridine synthase OS=Mus musculus GN=Pusl1 PE=3 SV=1;>sp|A2ADA5-2|PUSL1_MOUSE Isoform 2 of tRNA pseudouridine synthase-like 1 OS=Mus m	4	3	3	3	2	2	2	1	2	2	3	3	3	2	2	3	2	2	2	1	2	2	3	3	3	2	2	3	2	2	2	1	2	2	3	3	3	2	2	3	13.4	13.4	13.4	31.992	291
A2ADF7;A2ADF7-2	A2ADF7	Solute carrier family 25 member 34	Slc25a34	>sp|A2ADF7|S2534_MOUSE Solute carrier family 25 member 34 OS=Mus musculus GN=Slc25a34 PE=2 SV=1	2	3	3	3	2	2	1	1	0	1	1	1	1	3	3	2	2	2	1	1	0	1	1	1	1	3	3	2	2	2	1	1	0	1	1	1	1	3	3	2	11.6	11.6	11.6	33.778	318
A2ADH1;F6WHL0;Q9CQY5;F6TBV1;Q9CQY5-3;Q9CQY5-2	A2ADH1;F6WHL0;Q9CQY5;F6TBV1;Q9CQY5-3;Q9CQY5-2	Magnesium transporter protein 1	Magt1	>tr|A2ADH1|A2ADH1_MOUSE Magnesium transporter 1 OS=Mus musculus GN=Magt1 PE=4 SV=1;>tr|F6WHL0|F6WHL0_MOUSE Magnesium transporter protein 1 (Fragment) OS=Mus musculus GN=Magt1 PE=4 SV=1;>sp|Q9CQY5|MAGT1_MOUSE Magnesium transporter protein 1 OS=Mus musculus	6	9	9	9	7	7	7	5	5	4	7	6	8	7	8	8	7	7	7	5	5	4	7	6	8	7	8	8	7	7	7	5	5	4	7	6	8	7	8	8	22	22	22	41.637	368
A2ADL9;Q63ZW7;A2ADS6;A2ADM0;Q63ZW7-2;A2ADS8;Q63ZW7-6;Q63ZW7-5;F6RSZ8;A2ADT1;A2ADM3;Q63ZW7-3;A2ADM2;Q63ZW7-4;Q3UWX0	A2ADL9;Q63ZW7;A2ADS6;A2ADM0;Q63ZW7-2;A2ADS8;Q63ZW7-6	InaD-like protein	Inadl	>tr|A2ADL9|A2ADL9_MOUSE InaD-like (Drosophila) OS=Mus musculus GN=Inadl PE=2 SV=1;>sp|Q63ZW7|INADL_MOUSE InaD-like protein OS=Mus musculus GN=Inadl PE=1 SV=2;>tr|A2ADS6|A2ADS6_MOUSE InaD-like (Drosophila) OS=Mus musculus GN=Inadl PE=4 SV=1;>tr|A2ADM0|A2ADM	15	33	33	33	11	13	21	15	12	17	15	12	14	14	18	18	11	13	21	15	12	17	15	12	14	14	18	18	11	13	21	15	12	17	15	12	14	14	18	18	27	27	27	198.51	1834
A2ADR9;Q8R3G1;A2ADR8	A2ADR9;Q8R3G1;A2ADR8	Nuclear inhibitor of protein phosphatase 1	Ppp1r8	>tr|A2ADR9|A2ADR9_MOUSE Protein phosphatase 1, regulatory (Inhibitor) subunit 8 OS=Mus musculus GN=Ppp1r8 PE=4 SV=1;>sp|Q8R3G1|PP1R8_MOUSE Nuclear inhibitor of protein phosphatase 1 OS=Mus musculus GN=Ppp1r8 PE=1 SV=1;>tr|A2ADR8|A2ADR8_MOUSE Nuclear inhibi	3	4	4	4	3	3	3	0	0	0	3	3	3	0	0	0	3	3	3	0	0	0	3	3	3	0	0	0	3	3	3	0	0	0	3	3	3	0	0	0	17.1	17.1	17.1	38.527	351
A2ADS0;Q9ER00	A2ADS0;Q9ER00	Syntaxin-12	Stx12	>tr|A2ADS0|A2ADS0_MOUSE Syntaxin 12 OS=Mus musculus GN=Stx12 PE=3 SV=1;>sp|Q9ER00|STX12_MOUSE Syntaxin-12 OS=Mus musculus GN=Stx12 PE=1 SV=1	2	16	16	16	9	10	10	13	10	11	9	7	10	11	14	15	9	10	10	13	10	11	9	7	10	11	14	15	9	10	10	13	10	11	9	7	10	11	14	15	62.4	62.4	62.4	31.195	274
A2ADY9	A2ADY9	Protein DDI1 homolog 2	Ddi2	>sp|A2ADY9|DDI2_MOUSE Protein DDI1 homolog 2 OS=Mus musculus GN=Ddi2 PE=1 SV=1	1	15	15	15	8	5	8	2	2	2	8	7	13	1	2	3	8	5	8	2	2	2	8	7	13	1	2	3	8	5	8	2	2	2	8	7	13	1	2	3	48.1	48.1	48.1	44.59	399
A2AE04;Q9QZD9;A2AE03	A2AE04;Q9QZD9;A2AE03	Eukaryotic translation initiation factor 3 subunit I	Eif3i	>tr|A2AE04|A2AE04_MOUSE Eukaryotic translation initiation factor 3, subunit 1 OS=Mus musculus GN=Eif3i PE=4 SV=1;>sp|Q9QZD9|EIF3I_MOUSE Eukaryotic translation initiation factor 3 subunit I OS=Mus musculus GN=Eif3i PE=1 SV=1;>tr|A2AE03|A2AE03_MOUSE Eukaryot	3	16	16	16	11	14	12	5	2	6	13	14	15	6	10	7	11	14	12	5	2	6	13	14	15	6	10	7	11	14	12	5	2	6	13	14	15	6	10	7	74.8	74.8	74.8	36.46	325
A2AE27;Q9DBT5;F7ATG4;F7D159;A2AE25;A2AE22;F6WIB6	A2AE27;Q9DBT5	AMP deaminase 2	Ampd2	>tr|A2AE27|A2AE27_MOUSE AMP deaminase 2 OS=Mus musculus GN=Ampd2 PE=4 SV=1;>sp|Q9DBT5|AMPD2_MOUSE AMP deaminase 2 OS=Mus musculus GN=Ampd2 PE=1 SV=1	7	13	13	12	6	8	8	4	3	4	8	8	8	6	8	7	6	8	8	4	3	4	8	8	8	6	8	7	6	8	8	4	3	4	8	8	8	6	7	6	20.6	20.6	19.8	94.695	824
A2AE42	A2AE42	Cytochrome b561 domain-containing protein 1	Cyb561d1	>sp|A2AE42|C56D1_MOUSE Cytochrome b561 domain-containing protein 1 OS=Mus musculus GN=Cyb561d1 PE=2 SV=1	1	1	1	1	1	0	1	1	1	1	0	0	1	1	1	1	1	0	1	1	1	1	0	0	1	1	1	1	1	0	1	1	1	1	0	0	1	1	1	1	6.1	6.1	6.1	25.519	229
A2AE94;Q99N80;A2AE95	A2AE94;Q99N80;A2AE95	Synaptotagmin-like protein 1	Sytl1	>tr|A2AE94|A2AE94_MOUSE Synaptotagmin-like 1 OS=Mus musculus GN=Sytl1 PE=4 SV=1;>sp|Q99N80|SYTL1_MOUSE Synaptotagmin-like protein 1 OS=Mus musculus GN=Sytl1 PE=1 SV=2;>tr|A2AE95|A2AE95_MOUSE Synaptotagmin-like 1 OS=Mus musculus GN=Sytl1 PE=4 SV=1	3	3	3	3	0	1	1	0	0	0	1	1	1	0	0	0	0	1	1	0	0	0	1	1	1	0	0	0	0	1	1	0	0	0	1	1	1	0	0	0	6.9	6.9	6.9	62.5	568
A2AE97;Q80ZK9;A2AE98	A2AE97;Q80ZK9	WD and tetratricopeptide repeats protein 1	Wdtc1	>tr|A2AE97|A2AE97_MOUSE WD and tetratricopeptide repeats 1 OS=Mus musculus GN=Wdtc1 PE=4 SV=1;>sp|Q80ZK9|WDTC1_MOUSE WD and tetratricopeptide repeats protein 1 OS=Mus musculus GN=Wdtc1 PE=1 SV=1	3	3	3	3	1	2	2	2	1	1	3	2	2	1	2	2	1	2	2	2	1	1	3	2	2	1	2	2	1	2	2	2	1	1	3	2	2	1	2	2	6.1	6.1	6.1	75.732	677
A2AEM2;Q99LI2	A2AEM2;Q99LI2	Chloride channel CLIC-like protein 1	Clcc1	>tr|A2AEM2|A2AEM2_MOUSE Chloride channel CLIC-like 1 OS=Mus musculus GN=Clcc1 PE=4 SV=1;>sp|Q99LI2|CLCC1_MOUSE Chloride channel CLIC-like protein 1 OS=Mus musculus GN=Clcc1 PE=1 SV=1	2	12	12	12	2	3	5	4	4	5	9	7	10	5	6	4	2	3	5	4	4	5	9	7	10	5	6	4	2	3	5	4	4	5	9	7	10	5	6	4	29.8	29.8	29.8	61.239	544
A2AEQ7;P70303;A2AEQ8;P70303-2;A2AEQ6;P70303-3;A2AEQ5	A2AEQ7;P70303;A2AEQ8;P70303-2;A2AEQ6;P70303-3	CTP synthase 2	Ctps2	>tr|A2AEQ7|A2AEQ7_MOUSE Cytidine 5-triphosphate synthase 2 OS=Mus musculus GN=Ctps2 PE=4 SV=1;>sp|P70303|PYRG2_MOUSE CTP synthase 2 OS=Mus musculus GN=Ctps2 PE=1 SV=1;>tr|A2AEQ8|A2AEQ8_MOUSE Cytidine 5-triphosphate synthase 2 OS=Mus musculus GN=Ctps2 PE=	7	8	7	7	5	5	3	1	1	2	6	6	5	2	2	3	4	4	2	0	0	1	5	5	4	1	1	2	4	4	2	0	0	1	5	5	4	1	1	2	16.9	14.8	14.8	65.514	586
A2AER4;Q3UIP1;Q9R0M8;F8WGY2;A2AER3	A2AER4;Q3UIP1;Q9R0M8;F8WGY2	UDP-galactose translocator	Slc35a2	>tr|A2AER4|A2AER4_MOUSE Solute carrier family 35 (UDP-galactose transporter) member 2 OS=Mus musculus GN=Slc35a2 PE=4 SV=1;>tr|Q3UIP1|Q3UIP1_MOUSE Solute carrier family 35 (UDP-galactose transporter) member 2 OS=Mus musculus GN=Slc35a2 PE=2 SV=1;>sp|Q9R0M8	5	6	6	5	1	1	1	5	4	2	0	2	1	6	5	4	1	1	1	5	4	2	0	2	1	6	5	4	1	1	1	5	4	2	0	2	1	5	5	4	22.1	22.1	20.4	41.066	393
A2AER7;Q91VJ5;A2AER8;A2AER9	A2AER7;Q91VJ5;A2AER8;A2AER9	Polyglutamine-binding protein 1	Pqbp1	>tr|A2AER7|A2AER7_MOUSE Polyglutamine binding protein 1 OS=Mus musculus GN=Pqbp1 PE=2 SV=1;>sp|Q91VJ5|PQBP1_MOUSE Polyglutamine-binding protein 1 OS=Mus musculus GN=Pqbp1 PE=2 SV=1;>tr|A2AER8|A2AER8_MOUSE Polyglutamine binding protein 1 (Fragment) OS=Mus m	4	2	2	2	0	0	1	0	0	0	0	2	1	0	0	0	0	0	1	0	0	0	0	2	1	0	0	0	0	0	1	0	0	0	0	2	1	0	0	0	11.4	11.4	11.4	30.597	263
A2AEV6;Q9JIG8	A2AEV6;Q9JIG8	PRA1 family protein 2	Praf2	>tr|A2AEV6|A2AEV6_MOUSE PRA1 domain family 2 OS=Mus musculus GN=Praf2 PE=4 SV=1;>sp|Q9JIG8|PRAF2_MOUSE PRA1 family protein 2 OS=Mus musculus GN=Praf2 PE=2 SV=1	2	3	3	3	3	3	3	3	3	1	3	3	3	3	2	3	3	3	3	3	3	1	3	3	3	3	2	3	3	3	3	3	3	1	3	3	3	3	2	3	16.3	16.3	16.3	19.478	178
A2AEV7	A2AEV7		Ccdc120	>tr|A2AEV7|A2AEV7_MOUSE Coiled-coil domain containing 120 OS=Mus musculus GN=Ccdc120 PE=2 SV=1	1	6	6	6	2	3	4	2	1	3	3	2	2	1	2	3	2	3	4	2	1	3	3	2	2	1	2	3	2	3	4	2	1	3	3	2	2	1	2	3	8.9	8.9	8.9	67.407	629
A2AEW1;Q64092;A2AEW0;Q64092-4;Q64092-2;Q64092-3;Q3UKG7;Q9R210;F6W7D6;Q9WTW4;E9PXK3;D3Z6Q7	A2AEW1;Q64092;A2AEW0;Q64092-4;Q64092-2;Q64092-3;Q3UKG7;Q9R210;F6W7D6;Q9WTW4;E9PXK3;D3Z6Q7	Transcription factor E3;Transcription factor EB;Transcription factor EC	Tfe3;Tfeb;Tfec	>tr|A2AEW1|A2AEW1_MOUSE Transcription factor E3 OS=Mus musculus GN=Tfe3 PE=4 SV=1;>sp|Q64092|TFE3_MOUSE Transcription factor E3 OS=Mus musculus GN=Tfe3 PE=1 SV=2;>tr|A2AEW0|A2AEW0_MOUSE Transcription factor E3 OS=Mus musculus GN=Tfe3 PE=4 SV=1;>sp|Q64092-4	12	2	2	1	1	1	1	0	0	0	1	0	2	0	1	1	1	1	1	0	0	0	1	0	2	0	1	1	1	1	1	0	0	0	1	0	1	0	1	1	4.2	4.2	2.8	61.475	572
A2AEW8;Q8VD04;A2AEW9;A2AEW5;A2AEW6	A2AEW8;Q8VD04;A2AEW9;A2AEW5;A2AEW6	GRIP1-associated protein 1	Gripap1	>tr|A2AEW8|A2AEW8_MOUSE GRIP1 associated protein 1 OS=Mus musculus GN=Gripap1 PE=2 SV=1;>sp|Q8VD04|GRAP1_MOUSE GRIP1-associated protein 1 OS=Mus musculus GN=Gripap1 PE=1 SV=1;>tr|A2AEW9|A2AEW9_MOUSE GRIP1 associated protein 1 OS=Mus musculus GN=Gripap1 PE=	5	10	10	10	5	9	8	0	0	0	7	6	8	0	0	0	5	9	8	0	0	0	7	6	8	0	0	0	5	9	8	0	0	0	7	6	8	0	0	0	20.7	20.7	20.7	95.912	837
A2AEX6;A2AEX8;A2AEY3;P97447;A2AEY2;A2AEY1;A2AEX7;P97447-2;A2AEY0;A2AEX9;Q8CDC8	A2AEX6;A2AEX8;A2AEY3;P97447;A2AEY2;A2AEY1	Four and a half LIM domains protein 1	Fhl1	>tr|A2AEX6|A2AEX6_MOUSE Four and a half LIM domains 1 OS=Mus musculus GN=Fhl1 PE=4 SV=1;>tr|A2AEX8|A2AEX8_MOUSE Four and a half LIM domains 1 OS=Mus musculus GN=Fhl1 PE=4 SV=1;>tr|A2AEY3|A2AEY3_MOUSE Four and a half LIM domains 1 OS=Mus musculus GN=Fhl1 PE	11	17	17	17	13	13	12	5	3	8	15	16	16	11	11	9	13	13	12	5	3	8	15	16	16	11	11	9	13	13	12	5	3	8	15	16	16	11	11	9	65	65	65	35.08	309
A2AF47;A2AF67;A2AF65	A2AF47;A2AF67	Dedicator of cytokinesis protein 11	Dock11	>sp|A2AF47|DOC11_MOUSE Dedicator of cytokinesis protein 11 OS=Mus musculus GN=Dock11 PE=1 SV=1;>tr|A2AF67|A2AF67_MOUSE Dedicator of cytokinesis 11 OS=Mus musculus GN=Dock11 PE=4 SV=1	3	17	17	17	5	5	9	3	2	4	6	5	5	3	3	1	5	5	9	3	2	4	6	5	5	3	3	1	5	5	9	3	2	4	6	5	5	3	3	1	10.8	10.8	10.8	237.77	2073
A2AF94;Q9D0K1	A2AF94;Q9D0K1	Peroxisomal membrane protein PEX13	Pex13	>tr|A2AF94|A2AF94_MOUSE Peroxisomal biogenesis factor 13 OS=Mus musculus GN=Pex13 PE=4 SV=1;>sp|Q9D0K1|PEX13_MOUSE Peroxisomal membrane protein PEX13 OS=Mus musculus GN=Pex13 PE=1 SV=1	2	10	10	10	7	8	7	8	9	5	8	6	7	8	8	9	7	8	7	8	9	5	8	6	7	8	8	9	7	8	7	8	9	5	8	6	7	8	8	9	38.5	38.5	38.5	44.609	405
A2AFF6;O35638;O70576;F6TNY1;Q8C918	A2AFF6;O35638	Cohesin subunit SA-2	Stag2	>tr|A2AFF6|A2AFF6_MOUSE Cohesin subunit SA-2 OS=Mus musculus GN=Stag2 PE=4 SV=1;>sp|O35638|STAG2_MOUSE Cohesin subunit SA-2 OS=Mus musculus GN=Stag2 PE=1 SV=3	5	15	15	12	8	7	11	4	3	3	8	12	13	4	5	4	8	7	11	4	3	3	8	12	13	4	5	4	6	5	8	2	1	1	5	9	10	2	4	2	14.3	14.3	11.8	145.7	1268
A2AFG8;A2AFG7;E9Q597;F7CG04;F7A5H7;F6UIL7;B7ZCD3	A2AFG8;A2AFG7		L1cam	>tr|A2AFG8|A2AFG8_MOUSE L1 cell adhesion molecule OS=Mus musculus GN=L1cam PE=4 SV=1;>tr|A2AFG7|A2AFG7_MOUSE L1 cell adhesion molecule OS=Mus musculus GN=L1cam PE=4 SV=1	7	14	14	1	6	4	7	11	10	10	5	6	4	6	9	9	6	4	7	11	10	10	5	6	4	6	9	9	1	0	1	0	0	0	1	1	1	0	0	0	16.7	16.7	1	140.43	1255
A2AFL4;P70699;A2AFL5;F6R5R5;F6VEG4	A2AFL4;P70699;A2AFL5	Lysosomal alpha-glucosidase	Gaa	>tr|A2AFL4|A2AFL4_MOUSE Glucosidase, alpha, acid OS=Mus musculus GN=Gaa PE=4 SV=1;>sp|P70699|LYAG_MOUSE Lysosomal alpha-glucosidase OS=Mus musculus GN=Gaa PE=1 SV=2;>tr|A2AFL5|A2AFL5_MOUSE Glucosidase, alpha, acid (Fragment) OS=Mus musculus GN=Gaa PE=4 SV=	5	6	6	6	3	2	3	3	3	3	2	2	3	5	6	6	3	2	3	3	3	3	2	2	3	5	6	6	3	2	3	3	3	3	2	2	3	5	6	6	10.1	10.1	10.1	106.25	953
A2AFP5;A2AFP4;Q3KNA5;Q8BHH2	A2AFP5		Rab9	>tr|A2AFP5|A2AFP5_MOUSE Protein Rab9 (Fragment) OS=Mus musculus GN=Rab9 PE=3 SV=1	4	10	1	1	7	7	9	9	10	9	8	9	9	9	9	9	0	0	1	1	1	1	0	0	0	0	0	0	0	0	1	1	1	1	0	0	0	0	0	0	57.9	4.5	4.5	22.946	202
A2AFQ0;Q7TMY8;Q7TMY8-3;Q7TMY8-4;Q7TMY8-2;F6XP90;E9PZ23;F6UYC1;A6H6E9;F6SJC5	A2AFQ0;Q7TMY8;Q7TMY8-3;Q7TMY8-4;Q7TMY8-2	E3 ubiquitin-protein ligase HUWE1	Huwe1	>tr|A2AFQ0|A2AFQ0_MOUSE E3 ubiquitin-protein ligase HUWE1 OS=Mus musculus GN=Huwe1 PE=4 SV=1;>sp|Q7TMY8|HUWE1_MOUSE E3 ubiquitin-protein ligase HUWE1 OS=Mus musculus GN=Huwe1 PE=1 SV=5;>sp|Q7TMY8-3|HUWE1_MOUSE Isoform 3 of E3 ubiquitin-protein ligase HUWE1	10	79	79	79	51	48	59	32	26	32	57	57	58	37	39	36	51	48	59	32	26	32	57	57	58	37	39	36	51	48	59	32	26	32	57	57	58	37	39	36	26.3	26.3	26.3	482.69	4378
A2AFQ2;Q99N15;O08756	A2AFQ2;Q99N15;O08756	3-hydroxyacyl-CoA dehydrogenase type-2	Hsd17b10	>tr|A2AFQ2|A2AFQ2_MOUSE 3-hydroxyacyl-CoA dehydrogenase type-2 OS=Mus musculus GN=Hsd17b10 PE=3 SV=1;>tr|Q99N15|Q99N15_MOUSE 17beta-hydroxysteroid dehydrogenase type 10/short chain L-3-hydroxyacyl-CoA dehydrogenase OS=Mus musculus GN=Hsd17b10 PE=2 SV=1;>sp	3	15	15	15	12	12	13	13	11	12	12	13	12	14	15	15	12	12	13	13	11	12	12	13	12	14	15	15	12	12	13	13	11	12	12	13	12	14	15	15	66.8	66.8	66.8	28.374	271
A2AFS3	A2AFS3	UPF0577 protein KIAA1324	Kiaa1324	>sp|A2AFS3|K1324_MOUSE UPF0577 protein KIAA1324 OS=Mus musculus GN=Kiaa1324 PE=2 SV=1	1	15	15	2	6	10	11	12	12	12	7	4	2	13	14	13	6	10	11	12	12	12	7	4	2	13	14	13	0	0	1	1	2	1	1	0	0	2	2	2	17.5	17.5	3.5	110.68	1009
A2AFW6;D6RCZ1	A2AFW6		Mtch2	>tr|A2AFW6|A2AFW6_MOUSE Mitochondrial carrier homolog 2 OS=Mus musculus GN=Mtch2 PE=3 SV=1	2	16	1	1	13	13	16	16	15	15	15	16	16	16	16	16	1	0	1	1	1	1	1	1	1	1	1	1	1	0	1	1	1	1	1	1	1	1	1	1	61.6	4.1	4.1	32.345	294
A2AFW7;Q791V5;Q9D050	A2AFW7;Q791V5;Q9D050	Mitochondrial carrier homolog 2	Mtch2	>tr|A2AFW7|A2AFW7_MOUSE MCG13498, isoform CRA_d OS=Mus musculus GN=Mtch2 PE=3 SV=1;>sp|Q791V5|MTCH2_MOUSE Mitochondrial carrier homolog 2 OS=Mus musculus GN=Mtch2 PE=1 SV=1;>tr|Q9D050|Q9D050_MOUSE Mitochondrial carrier homolog 2 OS=Mus musculus GN=Mtch2 PE	3	17	17	2	13	14	16	17	15	15	16	17	16	16	16	16	13	14	16	17	15	15	16	17	16	16	16	16	1	1	1	2	1	1	2	2	1	1	1	1	62.7	62.7	6.9	33.499	303
A2AG05;E9Q2S9;Q9CR29;Q9CR29-2	A2AG05;E9Q2S9;Q9CR29;Q9CR29-2	Coiled-coil domain-containing protein 43	Ccdc43	>tr|A2AG05|A2AG05_MOUSE Coiled-coil domain containing 43 OS=Mus musculus GN=Ccdc43 PE=4 SV=1;>tr|E9Q2S9|E9Q2S9_MOUSE Coiled-coil domain-containing protein 43 OS=Mus musculus GN=Ccdc43 PE=4 SV=1;>sp|Q9CR29|CCD43_MOUSE Coiled-coil domain-containing protein 4	4	3	3	3	1	1	0	0	0	0	1	1	2	0	0	0	1	1	0	0	0	0	1	1	2	0	0	0	1	1	0	0	0	0	1	1	2	0	0	0	17.1	17.1	17.1	25.049	222
A2AG30;O89114;Q3TY13	A2AG30;O89114;Q3TY13	DnaJ homolog subfamily B member 5	Dnajb5	>tr|A2AG30|A2AG30_MOUSE DnaJ (Hsp40) homolog subfamily B member 5 OS=Mus musculus GN=Dnajb5 PE=4 SV=1;>sp|O89114|DNJB5_MOUSE DnaJ homolog subfamily B member 5 OS=Mus musculus GN=Dnajb5 PE=2 SV=1;>tr|Q3TY13|Q3TY13_MOUSE DnaJ (Hsp40) homolog subfamily B memb	3	3	3	3	2	2	2	1	2	2	3	1	2	1	3	2	2	2	2	1	2	2	3	1	2	1	3	2	2	2	2	1	2	2	3	1	2	1	3	2	7.3	7.3	7.3	43.018	382
A2AG40;Q99JB2;F6WI02;A2AG39;A2AG41	A2AG40;Q99JB2;F6WI02;A2AG39	Stomatin-like protein 2	Stoml2	>tr|A2AG40|A2AG40_MOUSE MCG1040650 OS=Mus musculus GN=Stoml2 PE=4 SV=1;>sp|Q99JB2|STML2_MOUSE Stomatin-like protein 2 OS=Mus musculus GN=Stoml2 PE=1 SV=1;>tr|F6WI02|F6WI02_MOUSE Stomatin-like protein 2 (Fragment) OS=Mus musculus GN=Stoml2 PE=4 SV=1;>tr|A2A	5	14	14	14	8	8	8	12	10	11	11	8	11	12	11	12	8	8	8	12	10	11	11	8	11	12	11	12	8	8	8	12	10	11	11	8	11	12	11	12	63.5	63.5	63.5	38.384	353
A2AG61;Q8R550;Q3TA88;Q8R550-2;B1AVE8;Q8R550-3;Q8R550-8;Q8R550-4;E9Q0C1;E9QND4;Q8R550-5;Q8R550-6;B0R0Y8;B1AZ85;Q8R550-7	A2AG61;Q8R550;Q3TA88;Q8R550-2;B1AVE8;Q8R550-3;Q8R550-8;Q8R550-4;E9Q0C1;E9QND4;Q8R550-5;Q8R550-6;B0R0Y8;B1AZ85;Q8R550-7	SH3 domain-containing kinase-binding protein 1	Sh3kbp1	>tr|A2AG61|A2AG61_MOUSE SH3-domain kinase binding protein 1 OS=Mus musculus GN=Sh3kbp1 PE=4 SV=1;>sp|Q8R550|SH3K1_MOUSE SH3 domain-containing kinase-binding protein 1 OS=Mus musculus GN=Sh3kbp1 PE=1 SV=1;>tr|Q3TA88|Q3TA88_MOUSE SH3-domain kinase binding pr	15	4	4	4	4	2	2	1	1	1	1	1	1	1	2	1	4	2	2	1	1	1	1	1	1	1	2	1	4	2	2	1	1	1	1	1	1	1	2	1	7.5	7.5	7.5	78.169	709
A2AG68;Q64430	A2AG68;Q64430	Copper-transporting ATPase 1	Atp7a	>tr|A2AG68|A2AG68_MOUSE ATPase, Cu++ transporting, alpha polypeptide OS=Mus musculus GN=Atp7a PE=3 SV=1;>sp|Q64430|ATP7A_MOUSE Copper-transporting ATPase 1 OS=Mus musculus GN=Atp7a PE=1 SV=3	2	33	33	32	13	16	17	24	22	20	13	15	16	24	23	23	13	16	17	24	22	20	13	15	16	24	23	23	12	15	16	23	21	19	13	14	15	23	22	22	29.8	29.8	29.1	162.03	1492
A2AGA4	A2AGA4	Rhomboid-related protein 2;Rhomboid-related protein 2, N-terminal fragment;Rhomboid-related protein 2, C-terminal fragment	Rhbdl2	>sp|A2AGA4|RHBL2_MOUSE Rhomboid-related protein 2 OS=Mus musculus GN=Rhbdl2 PE=1 SV=1	1	7	7	7	1	2	4	6	6	6	3	2	3	5	5	6	1	2	4	6	6	6	3	2	3	5	5	6	1	2	4	6	6	6	3	2	3	5	5	6	21.9	21.9	21.9	33.735	302
A2AGD8;Q8VCT9;A2AGD9;Q8BKF0;A2AGE0	A2AGD8;Q8VCT9;A2AGD9;Q8BKF0;A2AGE0	Dual specificity testis-specific protein kinase 2	Tesk2	>tr|A2AGD8|A2AGD8_MOUSE Testis-specific kinase 2 OS=Mus musculus GN=Tesk2 PE=3 SV=1;>sp|Q8VCT9|TESK2_MOUSE Dual specificity testis-specific protein kinase 2 OS=Mus musculus GN=Tesk2 PE=2 SV=1;>tr|A2AGD9|A2AGD9_MOUSE Dual-specificity testis-specific protein	5	4	4	4	2	2	4	0	1	1	2	2	2	1	0	0	2	2	4	0	1	1	2	2	2	1	0	0	2	2	4	0	1	1	2	2	2	1	0	0	8.8	8.8	8.8	63.469	570
A2AGE2;Q9D2E2;A2AGE1;Q9D2E2-2;F6ZMT3	A2AGE2;Q9D2E2;A2AGE1;Q9D2E2-2	Target of EGR1 protein 1	Toe1	>tr|A2AGE2|A2AGE2_MOUSE Target of EGR1, member 1 (Nuclear) OS=Mus musculus GN=Toe1 PE=4 SV=1;>sp|Q9D2E2|TOE1_MOUSE Target of EGR1 protein 1 OS=Mus musculus GN=Toe1 PE=2 SV=1;>tr|A2AGE1|A2AGE1_MOUSE Target of EGR1, member 1 (Nuclear) OS=Mus musculus GN=Toe1	5	5	5	5	2	3	2	1	1	1	3	4	3	0	1	2	2	3	2	1	1	1	3	4	3	0	1	2	2	3	2	1	1	1	3	4	3	0	1	2	11.5	11.5	11.5	56.87	511
A2AGE4;Q8K248	A2AGE4;Q8K248	4-hydroxyphenylpyruvate dioxygenase;4-hydroxyphenylpyruvate dioxygenase-like protein	Hpdl	>tr|A2AGE4|A2AGE4_MOUSE 4-hydroxyphenylpyruvate dioxygenase OS=Mus musculus GN=Hpdl PE=3 SV=1;>sp|Q8K248|HPDL_MOUSE 4-hydroxyphenylpyruvate dioxygenase-like protein OS=Mus musculus GN=Hpdl PE=2 SV=1	2	3	3	3	3	2	3	1	1	0	3	3	2	1	1	1	3	2	3	1	1	0	3	3	2	1	1	1	3	2	3	1	1	0	3	3	2	1	1	1	9.7	9.7	9.7	39.909	371
A2AGH6;A2AGH9;A2AGH6-2;A2AGH8;A2AGH6-3;Q2NLB9;Q8BQM9-2;Q8BQM9	A2AGH6;A2AGH9;A2AGH6-2;A2AGH8;A2AGH6-3	Mediator of RNA polymerase II transcription subunit 12	Med12	>sp|A2AGH6|MED12_MOUSE Mediator of RNA polymerase II transcription subunit 12 OS=Mus musculus GN=Med12 PE=2 SV=1;>tr|A2AGH9|A2AGH9_MOUSE Mediator of RNA polymerase II transcription subunit 12 OS=Mus musculus GN=Med12 PE=4 SV=1;>sp|A2AGH6-2|MED12_MOUSE Isof	8	10	10	10	7	4	6	0	2	0	5	6	9	1	0	0	7	4	6	0	2	0	5	6	9	1	0	0	7	4	6	0	2	0	5	6	9	1	0	0	6	6	6	244.56	2190
A2AGJ0;Q8BT60;Q8JZW4;B2RS65;Q9DC53;Q0VE82;Q8BLR2;Q9Z140;Q3UYN2;Q1RLL3;Q9D6C8;Q05D94	A2AGJ0;Q8BT60	Copine-3	Cpne3	>tr|A2AGJ0|A2AGJ0_MOUSE Copine III OS=Mus musculus GN=Cpne3 PE=4 SV=1;>sp|Q8BT60|CPNE3_MOUSE Copine-3 OS=Mus musculus GN=Cpne3 PE=1 SV=2	12	17	17	16	16	16	14	10	11	10	13	14	14	13	13	14	16	16	14	10	11	10	13	14	14	13	13	14	15	15	13	9	10	9	12	13	13	12	12	13	38.8	38.8	37.1	59.584	533
A2AGJ6;Q924N4-2;Q924N4;E9QA29;Q3V0N8;Q6P6P5;A2AGJ9;Q3TWZ6;Q9JIS8;F8WIJ0;Q91V14;Q91V14-2;E9Q7M1;REV__E9Q4U2;REV__E9Q0K5	A2AGJ6;Q924N4-2;Q924N4;E9QA29;Q3V0N8;Q6P6P5;A2AGJ9	Solute carrier family 12 member 6	Slc12a6	>tr|A2AGJ6|A2AGJ6_MOUSE Solute carrier family 12, member 6 OS=Mus musculus GN=Slc12a6 PE=4 SV=1;>sp|Q924N4-2|S12A6_MOUSE Isoform 2 of Solute carrier family 12 member 6 OS=Mus musculus GN=Slc12a6;>sp|Q924N4|S12A6_MOUSE Solute carrier family 12 member 6 OS=M	15	30	27	27	9	12	15	21	22	22	10	12	16	24	27	26	8	11	14	18	19	19	10	12	16	21	24	23	8	11	14	18	19	19	10	12	16	21	24	23	30.3	28.4	28.4	122.04	1099
A2AGK4;Q924Y0;A2AGK3	A2AGK4;Q924Y0	Gamma-butyrobetaine dioxygenase	Bbox1	>tr|A2AGK4|A2AGK4_MOUSE Butyrobetaine (Gamma), 2-oxoglutarate dioxygenase 1 (Gamma-butyrobetaine hydroxylase) OS=Mus musculus GN=Bbox1 PE=4 SV=1;>sp|Q924Y0|BODG_MOUSE Gamma-butyrobetaine dioxygenase OS=Mus musculus GN=Bbox1 PE=2 SV=1	3	4	4	4	4	3	3	0	1	3	3	2	2	2	2	1	4	3	3	0	1	3	3	2	2	2	2	1	4	3	3	0	1	3	3	2	2	2	2	1	11.9	11.9	11.9	44.698	387
A2AGP7;Q8CID3	A2AGP7;Q8CID3	Protein FAM20A	Fam20a	>tr|A2AGP7|A2AGP7_MOUSE Ortholog of human family with sequence similarity 20, member A FAM20A OS=Mus musculus GN=Fam20a PE=4 SV=1;>sp|Q8CID3|FA20A_MOUSE Protein FAM20A OS=Mus musculus GN=Fam20a PE=1 SV=1	2	1	1	1	1	0	1	1	0	0	0	0	0	1	1	1	1	0	1	1	0	0	0	0	0	1	1	1	1	0	1	1	0	0	0	0	0	1	1	1	2.4	2.4	2.4	61.525	541
A2AGQ4;E9QKN1;Q80U28-14;A2AGQ6;A2AGQ5;A2AGR0;Q80U28;A2AGQ9;Q80U28-15;A2AGQ7;Q80U28-2;E9QN47;A2AGQ8;Q80U28-3;A2AGQ2;A2AGQ3;Q80U28-4;E9Q9V8;Q80U28-5;Q80U28-6;Q80U28-7;Q80U28-8;Q80U28-9;Q80U28-10;E9QMB8;Q80U28-11;A2AGR1;Q80U28-12;A6PWP8;Q80U28-13;A6PWP7	A2AGQ4;E9QKN1;Q80U28-14;A2AGQ6;A2AGQ5;A2AGR0;Q80U28;A2AGQ9;Q80U28-15;A2AGQ7;Q80U28-2;E9QN47;A2AGQ8;Q80U28-3;A2AGQ2;A2AGQ3;Q80U28-4;E9Q9V8;Q80U28-5;Q80U28-6;Q80U28-7;Q80U28-8;Q80U28-9;Q80U28-10;E9QMB8;Q80U28-11;A2AGR1;Q80U28-12;A6PWP8;Q80U28-13	MAP kinase-activating death domain protein	Madd	>tr|A2AGQ4|A2AGQ4_MOUSE MAP kinase-activating death domain protein OS=Mus musculus GN=Madd PE=4 SV=1;>tr|E9QKN1|E9QKN1_MOUSE MAP kinase-activating death domain protein OS=Mus musculus GN=Madd PE=4 SV=1;>sp|Q80U28-14|MADD_MOUSE Isoform 14 of MAP kinase-acti	31	5	5	5	3	0	4	0	0	0	5	3	4	0	0	0	3	0	4	0	0	0	5	3	4	0	0	0	3	0	4	0	0	0	5	3	4	0	0	0	3.9	3.9	3.9	181.18	1632
A2AGR5;P24638;E9Q9I3;B7ZCF5;B7ZCF4	A2AGR5;P24638;E9Q9I3;B7ZCF5	Lysosomal acid phosphatase	Acp2	>tr|A2AGR5|A2AGR5_MOUSE Acid phosphatase 2 lysosomal OS=Mus musculus GN=Acp2 PE=4 SV=1;>sp|P24638|PPAL_MOUSE Lysosomal acid phosphatase OS=Mus musculus GN=Acp2 PE=2 SV=2;>tr|E9Q9I3|E9Q9I3_MOUSE Lysosomal acid phosphatase OS=Mus musculus GN=Acp2 PE=4 SV=1;>	5	10	10	10	5	5	5	8	5	5	5	6	7	8	9	8	5	5	5	8	5	5	5	6	7	8	9	8	5	5	5	8	5	5	5	6	7	8	9	8	22.7	22.7	22.7	48.508	423
A2AGT5;A2AGT5-3;A2AGT5-2	A2AGT5;A2AGT5-3;A2AGT5-2	Cytoskeleton-associated protein 5	Ckap5	>sp|A2AGT5|CKAP5_MOUSE Cytoskeleton-associated protein 5 OS=Mus musculus GN=Ckap5 PE=2 SV=1;>sp|A2AGT5-3|CKAP5_MOUSE Isoform 3 of Cytoskeleton-associated protein 5 OS=Mus musculus GN=Ckap5;>sp|A2AGT5-2|CKAP5_MOUSE Isoform 2 of Cytoskeleton-associated prote	3	34	34	34	14	17	18	9	5	8	24	27	25	9	8	7	14	17	18	9	5	8	24	27	25	9	8	7	14	17	18	9	5	8	24	27	25	9	8	7	22.3	22.3	22.3	225.63	2032
A2AH22;A2AH22-6;A2AH22-2;A2AH22-7;A2AH22-5;E9Q961;A2AH22-3;A2AH22-4	A2AH22;A2AH22-6;A2AH22-2;A2AH22-7;A2AH22-5;E9Q961;A2AH22-3;A2AH22-4	Activating molecule in BECN1-regulated autophagy protein 1	Ambra1	>sp|A2AH22|AMRA1_MOUSE Activating molecule in BECN1-regulated autophagy protein 1 OS=Mus musculus GN=Ambra1 PE=1 SV=1;>sp|A2AH22-6|AMRA1_MOUSE Isoform 6 of Activating molecule in BECN1-regulated autophagy protein 1 OS=Mus musculus GN=Ambra1;>sp|A2AH22-2|AM	8	11	11	11	6	5	8	3	3	3	5	5	8	1	1	1	6	5	8	3	3	3	5	5	8	1	1	1	6	5	8	3	3	3	5	5	8	1	1	1	11.5	11.5	11.5	142.88	1300
A2AH25;Q5FWK3;Q8C5A0	A2AH25;Q5FWK3;Q8C5A0	Rho GTPase-activating protein 1	Arhgap1	>tr|A2AH25|A2AH25_MOUSE Rho GTPase activating protein 1 OS=Mus musculus GN=Arhgap1 PE=4 SV=1;>sp|Q5FWK3|RHG01_MOUSE Rho GTPase-activating protein 1 OS=Mus musculus GN=Arhgap1 PE=1 SV=1;>tr|Q8C5A0|Q8C5A0_MOUSE Rho GTPase-activating protein 1 OS=Mus musculus	3	15	15	15	12	14	14	9	5	11	13	14	13	11	13	12	12	14	14	9	5	11	13	14	13	11	13	12	12	14	14	9	5	11	13	14	13	11	13	12	37.2	37.2	37.2	54.437	479
A2AH38;Q9Z0W3;Q9Z0W3-2	A2AH38;Q9Z0W3;Q9Z0W3-2	Nuclear pore complex protein Nup160	Nup160	>tr|A2AH38|A2AH38_MOUSE Nucleoporin 160 OS=Mus musculus GN=Nup160 PE=4 SV=1;>sp|Q9Z0W3|NU160_MOUSE Nuclear pore complex protein Nup160 OS=Mus musculus GN=Nup160 PE=1 SV=2;>sp|Q9Z0W3-2|NU160_MOUSE Isoform 2 of Nuclear pore complex protein Nup160 OS=Mus musc	3	23	23	23	8	13	17	4	5	7	16	19	18	12	12	11	8	13	17	4	5	7	16	19	18	12	12	11	8	13	17	4	5	7	16	19	18	12	12	11	24	24	24	158.23	1402
A2AH73;Q9DCD0	A2AH73;Q9DCD0	6-phosphogluconate dehydrogenase, decarboxylating	Pgd	>tr|A2AH73|A2AH73_MOUSE 6-phosphogluconate dehydrogenase, decarboxylating OS=Mus musculus GN=Pgd PE=3 SV=1;>sp|Q9DCD0|6PGD_MOUSE 6-phosphogluconate dehydrogenase, decarboxylating OS=Mus musculus GN=Pgd PE=2 SV=3	2	25	25	25	13	19	18	19	14	20	17	19	20	20	22	22	13	19	18	19	14	20	17	19	20	20	22	22	13	19	18	19	14	20	17	19	20	20	22	22	59.8	59.8	59.8	53.247	483
A2AH79;Q60575;A2AH78;Q60575-2;A2AH75;Q60575-3;E9Q9G6;Q6TA13;G3UW47;P33173;E9QAN4;Q5DTN3	A2AH79;Q60575;A2AH78;Q60575-2;A2AH75;Q60575-3	Kinesin-like protein KIF1B	Kif1b	>tr|A2AH79|A2AH79_MOUSE Kinesin family member 1B OS=Mus musculus GN=Kif1b PE=3 SV=1;>sp|Q60575|KIF1B_MOUSE Kinesin-like protein KIF1B OS=Mus musculus GN=Kif1b PE=1 SV=2;>tr|A2AH78|A2AH78_MOUSE Kinesin family member 1B OS=Mus musculus GN=Kif1b PE=3 SV=1;>sp	12	7	3	3	4	4	6	3	2	2	6	5	4	2	1	3	1	1	2	2	0	0	3	2	1	0	0	1	1	1	2	2	0	0	3	2	1	0	0	1	3.9	1.8	1.8	204.08	1816
A2AH85;O08810;Q543F1;G3UZ34;G3UXK8;G3UZ25	A2AH85;O08810;Q543F1;G3UZ34	116 kDa U5 small nuclear ribonucleoprotein component	Eftud2	>tr|A2AH85|A2AH85_MOUSE 116 kDa U5 small nuclear ribonucleoprotein component OS=Mus musculus GN=Eftud2 PE=4 SV=1;>sp|O08810|U5S1_MOUSE 116 kDa U5 small nuclear ribonucleoprotein component OS=Mus musculus GN=Eftud2 PE=2 SV=1;>tr|Q543F1|Q543F1_MOUSE Elongati	6	35	34	34	23	27	27	11	8	6	29	27	26	19	19	19	22	26	26	10	7	5	28	26	25	18	18	18	22	26	26	10	7	5	28	26	25	18	18	18	49.4	48.4	48.4	109.49	972
A2AHA3;Q6PHN7;E9Q9H5;A2AH99;A2AH98;A2AHA2	A2AHA3;Q6PHN7;E9Q9H5;A2AH99;A2AH98;A2AHA2	Transmembrane protein 164	Tmem164	>tr|A2AHA3|A2AHA3_MOUSE Transmembrane protein 164 OS=Mus musculus GN=Tmem164 PE=4 SV=1;>sp|Q6PHN7|TM164_MOUSE Transmembrane protein 164 OS=Mus musculus GN=Tmem164 PE=2 SV=1;>tr|E9Q9H5|E9Q9H5_MOUSE Transmembrane protein 164 OS=Mus musculus GN=Tmem164 PE=4 S	6	3	3	3	1	2	2	1	1	1	3	1	3	3	2	3	1	2	2	1	1	1	3	1	3	3	2	3	1	2	2	1	1	1	3	1	3	3	2	3	8.8	8.8	8.8	33.44	296
A2AHI4;Q9CS42	A2AHI4;Q9CS42	Ribose-phosphate pyrophosphokinase;Ribose-phosphate pyrophosphokinase 2	Prps2	>tr|A2AHI4|A2AHI4_MOUSE Ribose-phosphate pyrophosphokinase OS=Mus musculus GN=Prps2 PE=3 SV=1;>sp|Q9CS42|PRPS2_MOUSE Ribose-phosphate pyrophosphokinase 2 OS=Mus musculus GN=Prps2 PE=1 SV=4	2	8	2	2	3	3	6	1	1	3	4	4	7	3	5	4	1	1	2	0	0	1	0	1	1	2	2	2	1	1	2	0	0	1	0	1	1	2	2	2	33.3	8.8	8.8	34.786	318
A2AHK0;A2AHJ7;Q80UP3;D3YWQ0;D3Z2W1;D3Z519	A2AHK0;A2AHJ7;Q80UP3	Diacylglycerol kinase zeta	Dgkz	>tr|A2AHK0|A2AHK0_MOUSE Diacylglycerol kinase zeta OS=Mus musculus GN=Dgkz PE=4 SV=1;>tr|A2AHJ7|A2AHJ7_MOUSE Diacylglycerol kinase zeta OS=Mus musculus GN=Dgkz PE=4 SV=1;>sp|Q80UP3|DGKZ_MOUSE Diacylglycerol kinase zeta OS=Mus musculus GN=Dgkz PE=1 SV=2	6	6	6	6	3	2	4	1	1	1	3	4	2	1	0	1	3	2	4	1	1	1	3	4	2	1	0	1	3	2	4	1	1	1	3	4	2	1	0	1	9.5	9.5	9.5	125.13	1123
A2AHS8;Q99N87;B2FDG7	A2AHS8;Q99N87	28S ribosomal protein S5, mitochondrial	Mrps5	>tr|A2AHS8|A2AHS8_MOUSE Mitochondrial ribosomal protein S5 OS=Mus musculus GN=Mrps5 PE=3 SV=1;>sp|Q99N87|RT05_MOUSE 28S ribosomal protein S5, mitochondrial OS=Mus musculus GN=Mrps5 PE=2 SV=1	3	19	19	19	12	15	15	9	8	11	13	10	17	10	13	10	12	15	15	9	8	11	13	10	17	10	13	10	12	15	15	9	8	11	13	10	17	10	13	10	46.8	46.8	46.8	48.206	432
A2AHV5;Q8R2T8;Q3UI98;Q8R2T8-2	A2AHV5;Q8R2T8;Q3UI98;Q8R2T8-2	General transcription factor 3C polypeptide 5	Gtf3c5	>tr|A2AHV5|A2AHV5_MOUSE General transcription factor IIIC, polypeptide 5 OS=Mus musculus GN=Gtf3c5 PE=4 SV=1;>sp|Q8R2T8|TF3C5_MOUSE General transcription factor 3C polypeptide 5 OS=Mus musculus GN=Gtf3c5 PE=2 SV=2;>tr|Q3UI98|Q3UI98_MOUSE General transcript	4	2	2	2	1	1	2	0	0	0	1	1	1	0	1	0	1	1	2	0	0	0	1	1	1	0	1	0	1	1	2	0	0	0	1	1	1	0	1	0	5.6	5.6	5.6	60.501	520
A2AHZ8;Q8C4Y3;F6SWS9;F6UFF7	A2AHZ8;Q8C4Y3	Negative elongation factor B	Cobra1	>tr|A2AHZ8|A2AHZ8_MOUSE Cofactor of BRCA1 OS=Mus musculus GN=Cobra1 PE=4 SV=1;>sp|Q8C4Y3|NELFB_MOUSE Negative elongation factor B OS=Mus musculus GN=Cobra1 PE=2 SV=2	4	10	10	10	6	4	6	3	1	3	4	6	4	3	2	3	6	4	6	3	1	3	4	6	4	3	2	3	6	4	6	3	1	3	4	6	4	3	2	3	24	24	24	65.636	580
A2AI05;A2AI05-2;A2AI05-3;F6XCS1	A2AI05;A2AI05-2;A2AI05-3;F6XCS1	NADPH-dependent diflavin oxidoreductase 1	Ndor1	>sp|A2AI05|NDOR1_MOUSE NADPH-dependent diflavin oxidoreductase 1 OS=Mus musculus GN=Ndor1 PE=2 SV=1;>sp|A2AI05-2|NDOR1_MOUSE Isoform 2 of NADPH-dependent diflavin oxidoreductase 1 OS=Mus musculus GN=Ndor1;>sp|A2AI05-3|NDOR1_MOUSE Isoform 3 of NADPH-depende	4	2	2	2	1	1	2	0	0	0	2	2	2	0	0	0	1	1	2	0	0	0	2	2	2	0	0	0	1	1	2	0	0	0	2	2	2	0	0	0	4.2	4.2	4.2	67.182	598
A2AI08	A2AI08	Taperin	Tprn	>sp|A2AI08|TPRN_MOUSE Taperin OS=Mus musculus GN=Tprn PE=1 SV=1	1	15	15	15	12	9	13	9	7	10	9	10	12	11	13	11	12	9	13	9	7	10	9	10	12	11	13	11	12	9	13	9	7	10	9	10	12	11	13	11	32.6	32.6	32.6	80.088	749
A2AI35;Q3THG9;A2A4P4;A2A4P3	A2AI35;Q3THG9;A2A4P4;A2A4P3	Alanyl-tRNA editing protein Aarsd1	Aarsd1	>tr|A2AI35|A2AI35_MOUSE Alanyl-tRNA synthetase domain containing 1 OS=Mus musculus GN=Aarsd1 PE=4 SV=1;>sp|Q3THG9|AASD1_MOUSE Alanyl-tRNA editing protein Aarsd1 OS=Mus musculus GN=Aarsd1 PE=1 SV=2;>tr|A2A4P4|A2A4P4_MOUSE Alanyl-tRNA synthetase domain conta	4	8	8	8	4	6	6	3	2	2	6	6	4	4	3	2	4	6	6	3	2	2	6	6	4	4	3	2	4	6	6	3	2	2	6	6	4	4	3	2	33.7	33.7	33.7	44.97	412
A2AI38;P27038;P27040;P27040-3;P27040-2;P27040-4	A2AI38;P27038	Activin receptor type-2A	Acvr2a	>tr|A2AI38|A2AI38_MOUSE Activin receptor IIA OS=Mus musculus GN=Acvr2a PE=2 SV=1;>sp|P27038|AVR2A_MOUSE Activin receptor type-2A OS=Mus musculus GN=Acvr2a PE=1 SV=1	6	9	9	9	3	4	5	7	5	5	3	5	3	5	6	6	3	4	5	7	5	5	3	5	3	5	6	6	3	4	5	7	5	5	3	5	3	5	6	6	22.6	22.6	22.6	57.889	513
A2AI52;Q80U87;D3Z5K3	A2AI52;Q80U87	Ubiquitin carboxyl-terminal hydrolase;Ubiquitin carboxyl-terminal hydrolase 8	Usp8	>tr|A2AI52|A2AI52_MOUSE Ubiquitin carboxyl-terminal hydrolase OS=Mus musculus GN=Usp8 PE=3 SV=1;>sp|Q80U87|UBP8_MOUSE Ubiquitin carboxyl-terminal hydrolase 8 OS=Mus musculus GN=Usp8 PE=1 SV=2	3	7	7	7	6	6	4	0	1	0	4	3	2	0	1	1	6	6	4	0	1	0	4	3	2	0	1	1	6	6	4	0	1	0	4	3	2	0	1	1	9.2	9.2	9.2	123.89	1091
A2AIJ2	A2AIJ2		Cd82	>tr|A2AIJ2|A2AIJ2_MOUSE CD82 antigen (Fragment) OS=Mus musculus GN=Cd82 PE=4 SV=1	1	2	1	1	1	1	1	2	2	2	1	2	1	2	1	2	0	0	0	1	1	1	0	1	0	1	0	1	0	0	0	1	1	1	0	1	0	1	0	1	14.4	6.8	6.8	16.02	146
A2AIL3;Q91WB4;A8Y5N8	A2AIL3;Q91WB4;A8Y5N8	Pleckstrin homology domain-containing family F member 2	Plekhf2	>tr|A2AIL3|A2AIL3_MOUSE Pleckstrin homology domain containing family F (With FYVE domain) member 2 OS=Mus musculus GN=Plekhf2 PE=4 SV=1;>sp|Q91WB4|PKHF2_MOUSE Pleckstrin homology domain-containing family F member 2 OS=Mus musculus GN=Plekhf2 PE=1 SV=1;>tr|	3	5	4	4	3	2	2	0	1	1	3	2	1	0	0	1	2	1	2	0	0	0	2	1	1	0	0	0	2	1	2	0	0	0	2	1	1	0	0	0	24.1	20.1	20.1	27.754	249
A2AIN8;Q8C503	A2AIN8;Q8C503	Signaling threshold-regulating transmembrane adapter 1	Sit1	>tr|A2AIN8|A2AIN8_MOUSE Suppression inducing transmembrane adaptor 1 OS=Mus musculus GN=Sit1 PE=4 SV=1;>sp|Q8C503|SIT1_MOUSE Signaling threshold-regulating transmembrane adapter 1 OS=Mus musculus GN=Sit1 PE=1 SV=1	2	1	1	1	0	0	0	1	1	1	0	0	0	1	1	1	0	0	0	1	1	1	0	0	0	1	1	1	0	0	0	1	1	1	0	0	0	1	1	1	7.8	7.8	7.8	19.578	180
A2AIW8;Q9DC61;A2AIW9	A2AIW8;Q9DC61;A2AIW9	Mitochondrial-processing peptidase subunit alpha	Pmpca	>tr|A2AIW8|A2AIW8_MOUSE Peptidase (Mitochondrial processing) alpha OS=Mus musculus GN=Pmpca PE=3 SV=1;>sp|Q9DC61|MPPA_MOUSE Mitochondrial-processing peptidase subunit alpha OS=Mus musculus GN=Pmpca PE=1 SV=1;>tr|A2AIW9|A2AIW9_MOUSE Mitochondrial-processing	3	17	17	17	15	15	14	5	4	7	15	15	12	8	10	9	15	15	14	5	4	7	15	15	12	8	10	9	15	15	14	5	4	7	15	15	12	8	10	9	39.1	39.1	39.1	58.278	524
A2AIX1;E9QAT4;F7BPW6;F6U3B5	A2AIX1;E9QAT4		Sec16a	>tr|A2AIX1|A2AIX1_MOUSE Protein Sec16a OS=Mus musculus GN=Sec16a PE=4 SV=1;>tr|E9QAT4|E9QAT4_MOUSE Protein Sec16a OS=Mus musculus GN=Sec16a PE=4 SV=1	4	28	28	28	20	17	22	2	3	5	20	19	22	8	6	6	20	17	22	2	3	5	20	19	22	8	6	6	20	17	22	2	3	5	20	19	22	8	6	6	16.6	16.6	16.6	256.47	2377
A2AJ02;Q99JP4	A2AJ02;Q99JP4	Anaphase-promoting complex subunit CDC26	Cdc26	>tr|A2AJ02|A2AJ02_MOUSE Cell division cycle 26 OS=Mus musculus GN=Cdc26 PE=4 SV=1;>sp|Q99JP4|CDC26_MOUSE Anaphase-promoting complex subunit CDC26 OS=Mus musculus GN=Cdc26 PE=2 SV=1	2	2	2	2	2	1	1	0	0	0	1	1	1	0	0	0	2	1	1	0	0	0	1	1	1	0	0	0	2	1	1	0	0	0	1	1	1	0	0	0	28.2	28.2	28.2	9.7608	85
A2AJ15;A2AJ14	A2AJ15	Endoplasmic reticulum mannosyl-oligosaccharide 1,2-alpha-mannosidase	Man1b1	>sp|A2AJ15|MA1B1_MOUSE Endoplasmic reticulum mannosyl-oligosaccharide 1,2-alpha-mannosidase OS=Mus musculus GN=Man1b1 PE=2 SV=1	2	13	13	13	6	9	8	7	7	7	6	7	7	11	8	9	6	9	8	7	7	7	6	7	7	11	8	9	6	9	8	7	7	7	6	7	7	11	8	9	25.2	25.2	25.2	75.149	658
A2AJ34;Q8VCG4;Q9DAC2	A2AJ34;Q8VCG4;Q9DAC2	Complement component C8 gamma chain	C8g	>tr|A2AJ34|A2AJ34_MOUSE Complement component 8, gamma subunit OS=Mus musculus GN=C8g PE=3 SV=1;>sp|Q8VCG4|CO8G_MOUSE Complement component C8 gamma chain OS=Mus musculus GN=C8g PE=1 SV=1;>tr|Q9DAC2|Q9DAC2_MOUSE Complement component 8, gamma subunit OS=Mus m	3	4	4	4	2	2	4	3	1	1	4	2	3	2	2	1	2	2	4	3	1	1	4	2	3	2	2	1	2	2	4	3	1	1	4	2	3	2	2	1	19.8	19.8	19.8	22.508	202
A2AJ50;Q9D7M1	A2AJ50;Q9D7M1	Protein C20orf11 homolog	2310003C23Rik	>tr|A2AJ50|A2AJ50_MOUSE Novel protein OS=Mus musculus GN=2310003C23Rik PE=4 SV=1;>sp|Q9D7M1|CT011_MOUSE Protein C20orf11 homolog OS=Mus musculus PE=2 SV=1	2	8	8	8	4	6	7	4	4	4	4	6	6	5	6	6	4	6	7	4	4	4	4	6	6	5	6	6	4	6	7	4	4	4	4	6	6	5	6	6	46.5	46.5	46.5	26.778	228
A2AJ87;Q9CQN7;F7CXS7	A2AJ87;Q9CQN7;F7CXS7	39S ribosomal protein L41, mitochondrial	Mrpl41;Gm6434	>tr|A2AJ87|A2AJ87_MOUSE MCG55255 OS=Mus musculus GN=Mrpl41 PE=4 SV=1;>sp|Q9CQN7|RM41_MOUSE 39S ribosomal protein L41, mitochondrial OS=Mus musculus GN=Mrpl41 PE=2 SV=1;>tr|F7CXS7|F7CXS7_MOUSE Uncharacterized protein OS=Mus musculus GN=Gm6434 PE=4 SV=1	3	5	5	5	4	4	3	5	5	4	4	3	3	4	4	5	4	4	3	5	5	4	4	3	3	4	4	5	4	4	3	5	5	4	4	3	3	4	4	5	37	37	37	15.261	135
A2AJA5;Q9JMG1	A2AJA5;Q9JMG1	Endothelial differentiation-related factor 1	Edf1	>tr|A2AJA5|A2AJA5_MOUSE Endothelial differentiation-related factor 1 OS=Mus musculus GN=Edf1 PE=4 SV=1;>sp|Q9JMG1|EDF1_MOUSE Endothelial differentiation-related factor 1 OS=Mus musculus GN=Edf1 PE=1 SV=1	2	5	5	5	5	4	4	1	0	0	4	5	5	2	0	2	5	4	4	1	0	0	4	5	5	2	0	2	5	4	4	1	0	0	4	5	5	2	0	2	55.4	55.4	55.4	16.369	148
A2AJA8;Q9DAK9	A2AJA8;Q9DAK9	14 kDa phosphohistidine phosphatase	Phpt1	>tr|A2AJA8|A2AJA8_MOUSE Phosphohistidine phosphatase 1 OS=Mus musculus GN=Phpt1 PE=4 SV=1;>sp|Q9DAK9|PHP14_MOUSE 14 kDa phosphohistidine phosphatase OS=Mus musculus GN=Phpt1 PE=1 SV=1	2	2	2	2	1	2	2	0	0	0	1	1	1	0	0	0	1	2	2	0	0	0	1	1	1	0	0	0	1	2	2	0	0	0	1	1	1	0	0	0	25.8	25.8	25.8	13.996	124
A2AJG0;Q80UU2	A2AJG0;Q80UU2	Ribonuclease P protein subunit p38	Rpp38	>tr|A2AJG0|A2AJG0_MOUSE Ribonuclease P protein subunit p38 OS=Mus musculus GN=Rpp38 PE=4 SV=1;>sp|Q80UU2|RPP38_MOUSE Ribonuclease P protein subunit p38 OS=Mus musculus GN=Rpp38 PE=2 SV=1	2	3	3	3	0	2	2	0	0	0	2	2	2	1	1	1	0	2	2	0	0	0	2	2	2	1	1	1	0	2	2	0	0	0	2	2	2	1	1	1	14.6	14.6	14.6	31.189	280
A2AJI0;A8Y5P4;A2AJI0-2;A2AJI1;F6WF36	A2AJI0;A8Y5P4;A2AJI0-2;A2AJI1;F6WF36	MAP7 domain-containing protein 1	Map7d1;Mtap7d1	>sp|A2AJI0|MA7D1_MOUSE MAP7 domain-containing protein 1 OS=Mus musculus GN=Map7d1 PE=1 SV=1;>tr|A8Y5P4|A8Y5P4_MOUSE Microtubule-associated protein 7 domain containing 1 OS=Mus musculus GN=Mtap7d1 PE=4 SV=1;>sp|A2AJI0-2|MA7D1_MOUSE Isoform 2 of MAP7 domain-	5	2	2	2	1	1	1	0	0	1	1	0	1	0	2	0	1	1	1	0	0	1	1	0	1	0	2	0	1	1	1	0	0	1	1	0	1	0	2	0	2.2	2.2	2.2	93.275	846
A2AJI4;Q569Z6;Q8BZN7;F6YH92;F6YSQ2;Q80VM0;F7AB07	A2AJI4;Q569Z6;Q8BZN7	Thyroid hormone receptor-associated protein 3	Thrap3	>tr|A2AJI4|A2AJI4_MOUSE Thyroid hormone receptor associated protein 3 OS=Mus musculus GN=Thrap3 PE=4 SV=1;>sp|Q569Z6|TR150_MOUSE Thyroid hormone receptor-associated protein 3 OS=Mus musculus GN=Thrap3 PE=1 SV=1;>tr|Q8BZN7|Q8BZN7_MOUSE Thyroid hormone recep	7	33	33	33	30	30	30	7	8	8	29	27	29	8	10	8	30	30	30	7	8	8	29	27	29	8	10	8	30	30	30	7	8	8	29	27	29	8	10	8	33.6	33.6	33.6	108.18	951
A2AJP1;P28700;Q6LC96;E9Q9V9;A2AJP2;G3UZ09	A2AJP1;P28700;Q6LC96;E9Q9V9;A2AJP2	Retinoic acid receptor RXR-alpha	Rxra;Rxrg	>tr|A2AJP1|A2AJP1_MOUSE Retinoid X receptor alpha OS=Mus musculus GN=Rxra PE=2 SV=1;>sp|P28700|RXRA_MOUSE Retinoic acid receptor RXR-alpha OS=Mus musculus GN=Rxra PE=1 SV=1;>tr|Q6LC96|Q6LC96_MOUSE RXR alpha 2 OS=Mus musculus GN=Rxra PE=2 SV=1;>tr|E9Q9V9|E9	6	4	4	1	1	2	2	0	0	0	3	4	3	1	0	1	1	2	2	0	0	0	3	4	3	1	0	1	1	1	1	0	0	0	1	1	1	0	0	0	11.3	11.3	4.5	51.216	467
A2AJQ0;A8Y5Q0;A2AJP9;A8Y5Q1;Q3UV70	A2AJQ0;A8Y5Q0;A2AJP9;A8Y5Q1;Q3UV70	[Pyruvate dehydrogenase [acetyl-transferring]]-phosphatase 1, mitochondrial	Pdp1	>tr|A2AJQ0|A2AJQ0_MOUSE Protein phosphatase 2C, magnesium dependent, catalytic subunit OS=Mus musculus GN=Pdp1 PE=3 SV=2;>tr|A8Y5Q0|A8Y5Q0_MOUSE Protein phosphatase 2C, magnesium dependent, catalytic subunit OS=Mus musculus GN=Pdp1 PE=3 SV=1;>tr|A2AJP9|A2A	5	3	3	3	0	0	1	1	0	1	2	2	1	0	1	1	0	0	1	1	0	1	2	2	1	0	1	1	0	0	1	1	0	1	2	2	1	0	1	1	7.5	7.5	7.5	67.615	597
A2AJT6;Q8BMS4	A2AJT6;Q8BMS4	Hexaprenyldihydroxybenzoate methyltransferase, mitochondrial	Coq3	>tr|A2AJT6|A2AJT6_MOUSE Coenzyme Q3 homolog methyltransferase (Yeast) OS=Mus musculus GN=Coq3 PE=4 SV=1;>sp|Q8BMS4|COQ3_MOUSE Hexaprenyldihydroxybenzoate methyltransferase, mitochondrial OS=Mus musculus GN=Coq3 PE=2 SV=1	2	8	8	8	5	4	6	6	5	5	6	5	6	6	8	8	5	4	6	6	5	5	6	5	6	6	8	8	5	4	6	6	5	5	6	5	6	6	8	8	34.3	34.3	34.3	40.956	370
A2AJX2;Q9D1H6;A2AJX3	A2AJX2;Q9D1H6	NADH dehydrogenase [ubiquinone] 1 alpha subcomplex assembly factor 4	Ndufaf4	>tr|A2AJX2|A2AJX2_MOUSE Novel protein (Possible ortholog of Rat hormone-regulated proliferation-associated 20 kDa protein (HRPAP20)) OS=Mus musculus GN=Ndufaf4 PE=4 SV=1;>sp|Q9D1H6|NDUF4_MOUSE NADH dehydrogenase [ubiquinone] 1 alpha subcomplex assembly fac	3	11	11	11	5	7	6	7	6	8	8	5	5	10	7	10	5	7	6	7	6	8	8	5	5	10	7	10	5	7	6	7	6	8	8	5	5	10	7	10	70.5	70.5	70.5	20.082	173
A2AJX4	A2AJX4		Gm13318	>tr|A2AJX4|A2AJX4_MOUSE Novel low-density lipoprotein receptor domain class A containing protein (Fragment) OS=Mus musculus GN=Gm13318 PE=4 SV=1	1	4	4	4	1	1	2	2	2	2	2	1	1	3	3	2	1	1	2	2	2	2	2	1	1	3	3	2	1	1	2	2	2	2	2	1	1	3	3	2	19.6	19.6	19.6	34.628	321
A2AJX5;A6H8H2;E9Q449;F6WXD7	A2AJX5;A6H8H2;E9Q449		Dennd4c	>tr|A2AJX5|A2AJX5_MOUSE DENN/MADD domain containing 4C OS=Mus musculus GN=Dennd4c PE=4 SV=1;>tr|A6H8H2|A6H8H2_MOUSE Dennd4c protein OS=Mus musculus GN=Dennd4c PE=2 SV=1;>tr|E9Q449|E9Q449_MOUSE Protein Dennd4c OS=Mus musculus GN=Dennd4c PE=4 SV=1	4	27	27	27	11	15	16	9	9	9	13	11	16	13	12	12	11	15	16	9	9	9	13	11	16	13	12	12	11	15	16	9	9	9	13	11	16	13	12	12	18.6	18.6	18.6	216.45	1955
A2AK82;Q99J95;Q99J95-2;Q99J95-3;D6RHP4;B0R021;D6RGN3	A2AK82;Q99J95;Q99J95-2	Cyclin-dependent kinase 9	Cdk9	>tr|A2AK82|A2AK82_MOUSE Cyclin-dependent kinase 9 (CDC2-related kinase) OS=Mus musculus GN=Cdk9 PE=4 SV=1;>sp|Q99J95|CDK9_MOUSE Cyclin-dependent kinase 9 OS=Mus musculus GN=Cdk9 PE=1 SV=1;>sp|Q99J95-2|CDK9_MOUSE Isoform 2 of Cyclin-dependent kinase 9 OS=Mu	7	7	5	5	5	5	5	2	2	2	6	7	6	2	2	2	3	3	3	1	1	1	4	5	4	1	1	1	3	3	3	1	1	1	4	5	4	1	1	1	21.5	18.3	18.3	42.761	372
A2AK88;Q8R1J9;H3BK73;Q8R1J9-2	A2AK88;Q8R1J9;H3BK73;Q8R1J9-2	Torsin-2A	Tor2a	>tr|A2AK88|A2AK88_MOUSE Torsin family 2, member A OS=Mus musculus GN=Tor2a PE=4 SV=1;>sp|Q8R1J9|TOR2A_MOUSE Torsin-2A OS=Mus musculus GN=Tor2a PE=2 SV=1;>tr|H3BK73|H3BK73_MOUSE Salusin-beta (Fragment) OS=Mus musculus GN=Tor2a PE=4 SV=1;>sp|Q8R1J9-2|TOR2A_M	4	4	3	3	2	2	3	2	1	1	2	3	2	2	2	3	2	1	2	2	1	1	1	2	1	2	2	3	2	1	2	2	1	1	1	2	1	2	2	3	18.1	15	15	35.897	321
A2AK91;Q8BW00;E9PZ40	A2AK91;Q8BW00;E9PZ40	Probable peptidyl-tRNA hydrolase	Ptrh1	>tr|A2AK91|A2AK91_MOUSE Peptidyl-tRNA hydrolase 1 homolog (S. cerevisiae) OS=Mus musculus GN=Ptrh1 PE=4 SV=1;>sp|Q8BW00|PTH_MOUSE Probable peptidyl-tRNA hydrolase OS=Mus musculus GN=Ptrh1 PE=2 SV=1;>tr|E9PZ40|E9PZ40_MOUSE Probable peptidyl-tRNA hydrolase O	3	5	5	5	3	5	4	0	1	1	4	3	2	2	0	1	3	5	4	0	1	1	4	3	2	2	0	1	3	5	4	0	1	1	4	3	2	2	0	1	31.9	31.9	31.9	22.16	204
A2AKB1;P61965;F6Q3W0	A2AKB1;P61965;F6Q3W0	WD repeat-containing protein 5	Wdr5	>tr|A2AKB1|A2AKB1_MOUSE WD repeat domain 5 OS=Mus musculus GN=Wdr5 PE=4 SV=1;>sp|P61965|WDR5_MOUSE WD repeat-containing protein 5 OS=Mus musculus GN=Wdr5 PE=1 SV=1;>tr|F6Q3W0|F6Q3W0_MOUSE WD repeat-containing protein 5 (Fragment) OS=Mus musculus GN=Wdr5 PE	3	8	8	8	6	6	4	3	1	1	7	8	8	2	2	1	6	6	4	3	1	1	7	8	8	2	2	1	6	6	4	3	1	1	7	8	8	2	2	1	45.5	45.5	45.5	36.588	334
A2AKB8;Q7TQK4;F6TGV1	A2AKB8;Q7TQK4;F6TGV1	Exosome complex component RRP40	Exosc3	>tr|A2AKB8|A2AKB8_MOUSE Exosome component 3 OS=Mus musculus GN=Exosc3 PE=4 SV=1;>sp|Q7TQK4|EXOS3_MOUSE Exosome complex component RRP40 OS=Mus musculus GN=Exosc3 PE=1 SV=3;>tr|F6TGV1|F6TGV1_MOUSE Exosome complex component RRP40 (Fragment) OS=Mus musculus GN	3	7	7	7	4	5	3	1	1	2	4	3	5	1	1	2	4	5	3	1	1	2	4	3	5	1	1	2	4	5	3	1	1	2	4	3	5	1	1	2	40.1	40.1	40.1	29.546	274
A2AKD5;Q9JJW0;A2AKD6	A2AKD5;Q9JJW0;A2AKD6	Peroxisomal membrane protein 4	Pxmp4	>tr|A2AKD5|A2AKD5_MOUSE Peroxisomal membrane protein 4 OS=Mus musculus GN=Pxmp4 PE=4 SV=1;>sp|Q9JJW0|PXMP4_MOUSE Peroxisomal membrane protein 4 OS=Mus musculus GN=Pxmp4 PE=2 SV=3;>tr|A2AKD6|A2AKD6_MOUSE Peroxisomal membrane protein 4 OS=Mus musculus GN=Pxm	3	2	2	2	2	2	2	2	2	0	2	2	2	2	2	2	2	2	2	2	2	0	2	2	2	2	2	2	2	2	2	2	2	0	2	2	2	2	2	2	11.3	11.3	11.3	24.196	212
A2AKD8;Q61234;A2AKD7	A2AKD8;Q61234;A2AKD7	Alpha-1-syntrophin	Snta1	>tr|A2AKD8|A2AKD8_MOUSE Syntrophin acidic 1 OS=Mus musculus GN=Snta1 PE=4 SV=1;>sp|Q61234|SNTA1_MOUSE Alpha-1-syntrophin OS=Mus musculus GN=Snta1 PE=1 SV=1;>tr|A2AKD7|A2AKD7_MOUSE Alpha-1-syntrophin OS=Mus musculus GN=Snta1 PE=4 SV=1	3	3	3	3	2	1	1	2	2	1	1	2	1	2	1	1	2	1	1	2	2	1	1	2	1	2	1	1	2	1	1	2	2	1	1	2	1	2	1	1	5.4	5.4	5.4	53.664	503
A2AKG8;E9PYJ6;A2AKG8-2	A2AKG8;E9PYJ6	Uncharacterized protein KIAA1797	Kiaa1797;BC057079	>sp|A2AKG8|FOCAD_MOUSE Focadhesin OS=Mus musculus GN=Focad PE=2 SV=1;>tr|E9PYJ6|E9PYJ6_MOUSE Protein BC057079 OS=Mus musculus GN=BC057079 PE=4 SV=1	3	14	14	12	10	6	9	3	4	2	11	9	10	5	2	2	10	6	9	3	4	2	11	9	10	5	2	2	8	5	7	3	3	2	9	7	8	4	2	2	8.4	8.4	7.1	198.95	1798
A2AKH4;O09044;Q9D3L3;B0R030;E9Q8A1;B0R029	A2AKH4;O09044;Q9D3L3;B0R030;E9Q8A1;B0R029	Synaptosomal-associated protein;Synaptosomal-associated protein 23	Snap23	>tr|A2AKH4|A2AKH4_MOUSE Synaptosomal-associated protein OS=Mus musculus GN=Snap23 PE=2 SV=1;>sp|O09044|SNP23_MOUSE Synaptosomal-associated protein 23 OS=Mus musculus GN=Snap23 PE=1 SV=1;>tr|Q9D3L3|Q9D3L3_MOUSE Synaptosomal-associated protein OS=Mus musculu	6	16	16	15	8	9	7	13	14	15	7	9	7	13	13	14	8	9	7	13	14	15	7	9	7	13	13	14	8	9	7	12	13	14	7	9	7	12	12	13	82.4	82.4	82.4	23.261	210
A2AKK5;A2AKK5-2;Q8BGG9;A2BH60;Q8BGG9-2;A2AKK6	A2AKK5;A2AKK5-2;Q8BGG9;A2BH60;Q8BGG9-2	Acyl-coenzyme A amino acid N-acyltransferase 1;Acyl-coenzyme A amino acid N-acyltransferase 2	Acnat1;Acnat2	>sp|A2AKK5|ACNT1_MOUSE Acyl-coenzyme A amino acid N-acyltransferase 1 OS=Mus musculus GN=Acnat1 PE=1 SV=1;>sp|A2AKK5-2|ACNT1_MOUSE Isoform 2 of Acyl-coenzyme A amino acid N-acyltransferase 1 OS=Mus musculus GN=Acnat1;>sp|Q8BGG9|ACNT2_MOUSE Acyl-coenzyme A	6	12	12	12	8	5	8	4	1	2	11	8	8	3	2	3	8	5	8	4	1	2	11	8	8	3	2	3	8	5	8	4	1	2	11	8	8	3	2	3	37.3	37.3	37.3	46.07	416
A2AKK8;Q8VDT9	A2AKK8;Q8VDT9	39S ribosomal protein L50, mitochondrial	Mrpl50	>tr|A2AKK8|A2AKK8_MOUSE Mitochondrial ribosomal protein L50 OS=Mus musculus GN=Mrpl50 PE=4 SV=1;>sp|Q8VDT9|RM50_MOUSE 39S ribosomal protein L50, mitochondrial OS=Mus musculus GN=Mrpl50 PE=2 SV=2	2	6	6	6	3	3	3	3	3	4	4	3	3	4	5	2	3	3	3	3	3	4	4	3	3	4	5	2	3	3	3	3	3	4	4	3	3	4	5	2	48.4	48.4	48.4	18.213	159
A2AKL1;Q91YV9;A2AKL2;A2AKL3	A2AKL1;Q91YV9	Transmembrane protein C9orf125 homolog	2810432L12Rik	>tr|A2AKL1|A2AKL1_MOUSE Novel protein OS=Mus musculus GN=Tmem246 PE=4 SV=1;>sp|Q91YV9|TM246_MOUSE Transmembrane protein 246 OS=Mus musculus GN=Tmem246 PE=2 SV=1	4	10	10	10	6	3	5	6	2	5	5	6	6	5	7	5	6	3	5	6	2	5	5	6	6	5	7	5	6	3	5	6	2	5	5	6	6	5	7	5	33.5	33.5	33.5	46.591	403
A2AKN8;B5X0G2;A2CEK6;E9Q831;B8JI96;E9PVW0;A2BIN0;B5TE77;P11591	A2AKN8;B5X0G2;A2CEK6;E9Q831;B8JI96;E9PVW0;A2BIN0	Major urinary protein 17	Mup8;Mup17;Mup13;Mup14;Mup2	>tr|A2AKN8|A2AKN8_MOUSE Major urinary protein 5 OS=Mus musculus GN=Mup8 PE=3 SV=1;>sp|B5X0G2|MUP17_MOUSE Major urinary protein 17 OS=Mus musculus GN=Mup17 PE=2 SV=2;>tr|A2CEK6|A2CEK6_MOUSE Major urinary protein 11 OS=Mus musculus GN=Mup13 PE=3 SV=1;>tr|E9Q	9	10	2	0	6	8	9	2	2	3	6	8	9	4	1	2	1	1	2	0	1	1	0	1	2	1	0	1	0	0	0	0	0	0	0	0	0	0	0	0	67.2	11.7	0	20.606	180
A2AKP8;P28651	A2AKP8;P28651	Carbonic anhydrase-related protein	Car8;Ca8	>tr|A2AKP8|A2AKP8_MOUSE Carbonic anhydrase 8 OS=Mus musculus GN=Car8 PE=4 SV=1;>sp|P28651|CAH8_MOUSE Carbonic anhydrase-related protein OS=Mus musculus GN=Ca8 PE=1 SV=5	2	1	1	1	1	1	1	0	0	0	0	0	0	0	0	1	1	1	1	0	0	0	0	0	0	0	0	1	1	1	1	0	0	0	0	0	0	0	0	1	4.1	4.1	4.1	33.081	291
A2AKS8;Q9R100;A2AKS7	A2AKS8;Q9R100;A2AKS7	Cadherin-17	Cdh17	>tr|A2AKS8|A2AKS8_MOUSE Cadherin 17 OS=Mus musculus GN=Cdh17 PE=4 SV=1;>sp|Q9R100|CAD17_MOUSE Cadherin-17 OS=Mus musculus GN=Cdh17 PE=1 SV=1;>tr|A2AKS7|A2AKS7_MOUSE Cadherin 17 OS=Mus musculus GN=Cdh17 PE=4 SV=1	3	37	37	37	28	27	30	30	28	28	29	27	28	32	33	33	28	27	30	30	28	28	29	27	28	32	33	33	28	27	30	30	28	28	29	27	28	32	33	33	51.6	51.6	51.6	91.644	827
A2AKT7;Q6P5F9;F6YA11;A2AKT6	A2AKT7;Q6P5F9	Exportin-1	Xpo1	>tr|A2AKT7|A2AKT7_MOUSE Exportin 1, CRM1 homolog (Yeast) OS=Mus musculus GN=Xpo1 PE=4 SV=1;>sp|Q6P5F9|XPO1_MOUSE Exportin-1 OS=Mus musculus GN=Xpo1 PE=1 SV=1	4	26	26	26	13	16	14	7	7	7	18	20	22	10	12	9	13	16	14	7	7	7	18	20	22	10	12	9	13	16	14	7	7	7	18	20	22	10	12	9	31.2	31.2	31.2	123.09	1071
A2AKW0;Q5HZI9;A2AKV9;G3UYJ3	A2AKW0;Q5HZI9;A2AKV9;G3UYJ3	Mitochondrial carrier triple repeat protein 1	Mcart1	>tr|A2AKW0|A2AKW0_MOUSE Mitochondrial carrier triple repeat 1 OS=Mus musculus GN=Mcart1 PE=3 SV=1;>sp|Q5HZI9|S2551_MOUSE Solute carrier family 25 member 51 OS=Mus musculus GN=Slc25a51 PE=2 SV=1;>tr|A2AKV9|A2AKV9_MOUSE Mitochondrial carrier triple repeat 1	4	10	10	10	5	4	6	5	3	5	8	8	6	9	7	8	5	4	6	5	3	5	8	8	6	9	7	8	5	4	6	5	3	5	8	8	6	9	7	8	36.5	36.5	36.5	35.489	315
A2AL35;P13020;P13020-2;Q6PAC1;CON__Q3SX14;A6PWS5	A2AL35;P13020;P13020-2;Q6PAC1	Gelsolin	Gsn	>tr|A2AL35|A2AL35_MOUSE Gelsolin OS=Mus musculus GN=Gsn PE=4 SV=1;>sp|P13020|GELS_MOUSE Gelsolin OS=Mus musculus GN=Gsn PE=1 SV=3;>sp|P13020-2|GELS_MOUSE Isoform 2 of Gelsolin OS=Mus musculus GN=Gsn;>tr|Q6PAC1|Q6PAC1_MOUSE Gelsolin, isoform CRA_c OS=Mus mu	6	28	28	28	23	18	22	10	10	14	19	20	23	11	11	11	23	18	22	10	10	14	19	20	23	11	11	11	23	18	22	10	10	14	19	20	23	11	11	11	45.9	45.9	45.9	85.941	780
A2AL38;P54116;E9PW33;Q99L68	A2AL38;P54116;E9PW33;Q99L68	Erythrocyte band 7 integral membrane protein	Stom	>tr|A2AL38|A2AL38_MOUSE Stomatin OS=Mus musculus GN=Stom PE=4 SV=1;>sp|P54116|STOM_MOUSE Erythrocyte band 7 integral membrane protein OS=Mus musculus GN=Stom PE=1 SV=3;>tr|E9PW33|E9PW33_MOUSE Erythrocyte band 7 integral membrane protein OS=Mus musculus GN=	4	13	13	13	5	8	10	12	9	12	6	5	5	12	13	12	5	8	10	12	9	12	6	5	5	12	13	12	5	8	10	12	9	12	6	5	5	12	13	12	74.3	74.3	74.3	31.375	284
A2AL50;Q8C0I1;H3BKN2;A2AL49;H3BIY5	A2AL50;Q8C0I1;H3BKN2;A2AL49	Alkyldihydroxyacetonephosphate synthase, peroxisomal	Agps	>tr|A2AL50|A2AL50_MOUSE Alkyldihydroxyacetonephosphate synthase, peroxisomal OS=Mus musculus GN=Agps PE=4 SV=1;>sp|Q8C0I1|ADAS_MOUSE Alkyldihydroxyacetonephosphate synthase, peroxisomal OS=Mus musculus GN=Agps PE=1 SV=1;>tr|H3BKN2|H3BKN2_MOUSE Alkyldihydro	5	19	19	19	8	13	11	12	8	11	14	13	12	11	10	9	8	13	11	12	8	11	14	13	12	11	10	9	8	13	11	12	8	11	14	13	12	11	10	9	43.5	43.5	43.5	74.342	671
A2AL70;O70546-2;O70546;E9Q3Y9	A2AL70;O70546-2;O70546;E9Q3Y9	Lysine-specific demethylase 6A	Kdm6a	>tr|A2AL70|A2AL70_MOUSE Ubiquitously transcribed tetratricopeptide repeat OS=Mus musculus GN=Kdm6a PE=4 SV=1;>sp|O70546-2|KDM6A_MOUSE Isoform 2 of Lysine-specific demethylase 6A OS=Mus musculus GN=Kdm6a;>sp|O70546|KDM6A_MOUSE Lysine-specific demethylase 6A	4	2	2	2	0	2	2	1	0	0	2	1	1	0	0	0	0	2	2	1	0	0	2	1	1	0	0	0	0	2	2	1	0	0	2	1	1	0	0	0	2.5	2.5	2.5	157.46	1424
A2AL84;Q8BSY0;A2AL85;E9Q6M2;Q8CBM2;A2AL81;Q3TU40;A2AL75;E9PWI0;A2AL78;Q6P8S1;A2AL79;A2AL83;A2AL77;A2AL76;A2AL74;Q9D7J8;Q9CR06;E9Q513;A2AL71	A2AL84;Q8BSY0;A2AL85;E9Q6M2;Q8CBM2	Aspartyl/asparaginyl beta-hydroxylase	Asph	>tr|A2AL84|A2AL84_MOUSE Aspartate-beta-hydroxylase OS=Mus musculus GN=Asph PE=4 SV=1;>sp|Q8BSY0|ASPH_MOUSE Aspartyl/asparaginyl beta-hydroxylase OS=Mus musculus GN=Asph PE=2 SV=1;>tr|A2AL85|A2AL85_MOUSE Aspartate-beta-hydroxylase OS=Mus musculus GN=Asph PE	20	15	15	15	6	7	9	5	5	5	9	11	9	9	9	8	6	7	9	5	5	5	9	11	9	9	9	8	6	7	9	5	5	5	9	11	9	9	9	8	32.5	32.5	32.5	83.041	741
A2ALA6;E9Q5F2;P09925	A2ALA6;E9Q5F2;P09925	Surfeit locus protein 1	Surf1	>tr|A2ALA6|A2ALA6_MOUSE Surfeit gene 1 OS=Mus musculus GN=Surf1 PE=4 SV=1;>tr|E9Q5F2|E9Q5F2_MOUSE Surfeit locus protein 1 OS=Mus musculus GN=Surf1 PE=4 SV=1;>sp|P09925|SURF1_MOUSE Surfeit locus protein 1 OS=Mus musculus GN=Surf1 PE=2 SV=3	3	6	6	6	2	2	5	5	6	5	3	5	4	5	6	5	2	2	5	5	6	5	3	5	4	5	6	5	2	2	5	5	6	5	3	5	4	5	6	5	21.6	21.6	21.6	38.497	338
A2ALF2;Q6NZB0;A2ALF0;F6TQL3;A2ALF3;F7CXJ2;F6QIL6;D3Z4I5;E9PZT4	A2ALF2;Q6NZB0;A2ALF0;F6TQL3;A2ALF3	DnaJ homolog subfamily C member 8	Dnajc8	>tr|A2ALF2|A2ALF2_MOUSE DnaJ (Hsp40) homolog, subfamily C, member 8 OS=Mus musculus GN=Dnajc8 PE=2 SV=1;>sp|Q6NZB0|DNJC8_MOUSE DnaJ homolog subfamily C member 8 OS=Mus musculus GN=Dnajc8 PE=2 SV=2;>tr|A2ALF0|A2ALF0_MOUSE DnaJ (Hsp40) homolog, subfamily C,	9	13	13	13	10	11	12	2	3	3	9	12	10	4	3	2	10	11	12	2	3	3	9	12	10	4	3	2	10	11	12	2	3	3	9	12	10	4	3	2	55.3	55.3	55.3	29.812	253
A2ALK6;Q9JMC8	A2ALK6;Q9JMC8	Band 4.1-like protein 4B	Epb4.1l4b;Epb41l4b	>tr|A2ALK6|A2ALK6_MOUSE Erythrocyte protein band 4.1-like 4b OS=Mus musculus GN=Epb4.1l4b PE=4 SV=1;>sp|Q9JMC8|E41LB_MOUSE Band 4.1-like protein 4B OS=Mus musculus GN=Epb41l4b PE=2 SV=2	2	10	10	8	4	2	3	3	1	5	4	4	7	5	5	5	4	2	3	3	1	5	4	4	7	5	5	5	3	1	2	3	1	4	3	3	6	3	4	4	13.9	13.9	12	99.782	899
A2ALK8;Q14BS5;A2ALK9	A2ALK8;Q14BS5;A2ALK9	Tyrosine-protein phosphatase non-receptor type 3	Ptpn3	>sp|A2ALK8|PTN3_MOUSE Tyrosine-protein phosphatase non-receptor type 3 OS=Mus musculus GN=Ptpn3 PE=2 SV=1;>tr|Q14BS5|Q14BS5_MOUSE Protein tyrosine phosphatase, non-receptor type 3 OS=Mus musculus GN=Ptpn3 PE=2 SV=1;>tr|A2ALK9|A2ALK9_MOUSE Protein tyrosine	3	5	5	5	4	3	5	2	1	1	4	5	4	2	1	2	4	3	5	2	1	1	4	5	4	2	1	2	4	3	5	2	1	1	4	5	4	2	1	2	7.4	7.4	7.4	103.89	913
A2ALL3;Q9D241	A2ALL3;Q9D241	RING finger protein 186	Rnf186	>tr|A2ALL3|A2ALL3_MOUSE RING finger protein 186 OS=Mus musculus GN=Rnf186 PE=4 SV=1;>sp|Q9D241|RN186_MOUSE RING finger protein 186 OS=Mus musculus GN=Rnf186 PE=2 SV=3	2	8	8	8	2	2	3	5	5	5	2	3	2	6	6	7	2	2	3	5	5	5	2	3	2	6	6	7	2	2	3	5	5	5	2	3	2	6	6	7	36.8	36.8	36.8	30.223	280
A2ALM5;Q8VBW1;A2ALM6;Q8VBW1-2;Q8VBW1-3;E9Q151;F6UKB4;P31649;E9Q6T2;Q8VCS9;G5E8Z4;P31651;E9PXG1;D3YWZ5	A2ALM5;Q8VBW1;A2ALM6;Q8VBW1-2;Q8VBW1-3;E9Q151;F6UKB4	Transporter;Sodium- and chloride-dependent creatine transporter 1	Slc6a8	>tr|A2ALM5|A2ALM5_MOUSE Transporter OS=Mus musculus GN=Slc6a8 PE=3 SV=1;>sp|Q8VBW1|SC6A8_MOUSE Sodium- and chloride-dependent creatine transporter 1 OS=Mus musculus GN=Slc6a8 PE=2 SV=1;>tr|A2ALM6|A2ALM6_MOUSE Transporter OS=Mus musculus GN=Slc6a8 PE=2 SV=1	14	9	8	8	5	7	3	9	8	7	6	4	6	8	9	8	5	6	3	8	7	6	5	3	5	7	8	7	5	6	3	8	7	6	5	3	5	7	8	7	13.8	12.7	12.7	70.999	640
A2ALM8;Q61335	A2ALM8;Q61335	B-cell receptor-associated protein 31	Bcap31	>tr|A2ALM8|A2ALM8_MOUSE B-cell receptor-associated protein 31 OS=Mus musculus GN=Bcap31 PE=4 SV=1;>sp|Q61335|BAP31_MOUSE B-cell receptor-associated protein 31 OS=Mus musculus GN=Bcap31 PE=1 SV=3	2	17	17	17	13	14	15	15	15	13	14	14	17	14	13	14	13	14	15	15	15	13	14	14	17	14	13	14	13	14	15	15	15	13	14	14	17	14	13	14	46.1	46.1	46.1	27.956	245
A2ALM9;P48410;A2ALN0	A2ALM9;P48410;A2ALN0	ATP-binding cassette sub-family D member 1	Abcd1	>tr|A2ALM9|A2ALM9_MOUSE ATP-binding cassette, sub-family D (ALD), member 1 OS=Mus musculus GN=Abcd1 PE=3 SV=1;>sp|P48410|ABCD1_MOUSE ATP-binding cassette sub-family D member 1 OS=Mus musculus GN=Abcd1 PE=1 SV=1;>tr|A2ALN0|A2ALN0_MOUSE ATP-binding cassette	3	25	25	25	14	19	15	11	8	11	22	22	23	16	19	17	14	19	15	11	8	11	22	22	23	16	19	17	14	19	15	11	8	11	22	22	23	16	19	17	41.4	41.4	41.4	81.858	736
A2ALV3;Q62420;Q8BXU5;F6ZL13;A2ALV1	A2ALV3;Q62420;Q8BXU5;F6ZL13;A2ALV1	Endophilin-A1	Sh3gl2	>tr|A2ALV3|A2ALV3_MOUSE Endophilin-A1 OS=Mus musculus GN=Sh3gl2 PE=4 SV=1;>sp|Q62420|SH3G2_MOUSE Endophilin-A1 OS=Mus musculus GN=Sh3gl2 PE=1 SV=2;>tr|Q8BXU5|Q8BXU5_MOUSE Endophilin-A1 OS=Mus musculus GN=Sh3gl2 PE=2 SV=1;>tr|F6ZL13|F6ZL13_MOUSE Endophilin-	5	7	6	6	4	3	5	2	3	4	2	3	2	4	4	4	3	2	4	1	2	3	1	2	1	3	3	3	3	2	4	1	2	3	1	2	1	3	3	3	21.1	18.3	18.3	48.295	431
A2ALW3;Q91YR9;REV__Q3TVC7-3;REV__Q3TVC7	A2ALW3;Q91YR9	Prostaglandin reductase 1	Ptgr1	>tr|A2ALW3|A2ALW3_MOUSE Leukotriene B4 12-hydroxydehydrogenase OS=Mus musculus GN=Ptgr1 PE=4 SV=1;>sp|Q91YR9|PTGR1_MOUSE Prostaglandin reductase 1 OS=Mus musculus GN=Ptgr1 PE=2 SV=2	4	12	12	12	10	8	10	10	9	9	11	9	10	9	7	9	10	8	10	10	9	9	11	9	10	9	7	9	10	8	10	10	9	9	11	9	10	9	7	9	45.9	45.9	45.9	35.56	329
A2ALW5;A2ALW5-2	A2ALW5;A2ALW5-2	DnaJ homolog subfamily C member 25	Dnajc25	>sp|A2ALW5|DJC25_MOUSE DnaJ homolog subfamily C member 25 OS=Mus musculus GN=Dnajc25 PE=2 SV=1;>sp|A2ALW5-2|DJC25_MOUSE Isoform 2 of DnaJ homolog subfamily C member 25 OS=Mus musculus GN=Dnajc25	2	6	6	6	3	4	4	1	1	0	4	4	4	1	3	1	3	4	4	1	1	0	4	4	4	1	3	1	3	4	4	1	1	0	4	4	4	1	3	1	14.6	14.6	14.6	41.937	357
A2AM05;A2AM05-4	A2AM05;A2AM05-4	Centlein	Cntln	>sp|A2AM05|CNTLN_MOUSE Centlein OS=Mus musculus GN=Cntln PE=1 SV=1;>sp|A2AM05-4|CNTLN_MOUSE Isoform 4 of Centlein OS=Mus musculus GN=Cntln	2	3	3	3	2	2	2	1	1	2	2	3	2	1	1	1	2	2	2	1	1	2	2	3	2	1	1	1	2	2	2	1	1	2	2	3	2	1	1	1	2.3	2.3	2.3	160.75	1397
A2AM79;P56389	A2AM79;P56389	Cytidine deaminase	Cda	>tr|A2AM79|A2AM79_MOUSE Cytidine deaminase OS=Mus musculus GN=Cda PE=4 SV=1;>sp|P56389|CDD_MOUSE Cytidine deaminase OS=Mus musculus GN=Cda PE=1 SV=2	2	9	9	9	7	6	9	3	2	4	7	6	7	4	3	3	7	6	9	3	2	4	7	6	7	4	3	3	7	6	9	3	2	4	7	6	7	4	3	3	79.5	79.5	79.5	16.131	146
A2AMC4;Q91ZW2;Q3UXG7;A2AMC3;E9Q686;E9PZ15	A2AMC4;Q91ZW2;Q3UXG7;A2AMC3;E9Q686;E9PZ15	GDP-fucose protein O-fucosyltransferase 1	Pofut1	>tr|A2AMC4|A2AMC4_MOUSE Protein O-fucosyltransferase 1 OS=Mus musculus GN=Pofut1 PE=4 SV=1;>sp|Q91ZW2|OFUT1_MOUSE GDP-fucose protein O-fucosyltransferase 1 OS=Mus musculus GN=Pofut1 PE=2 SV=1;>tr|Q3UXG7|Q3UXG7_MOUSE GDP-fucose protein O-fucosyltransferase	6	3	3	3	1	1	1	0	0	0	2	1	3	1	0	1	1	1	1	0	0	0	2	1	3	1	0	1	1	1	1	0	0	0	2	1	3	1	0	1	10.4	10.4	10.4	44.688	393
A2AMG6;Q9R207	A2AMG6;Q9R207	Nibrin	Nbn	>tr|A2AMG6|A2AMG6_MOUSE Nibrin OS=Mus musculus GN=Nbn PE=4 SV=1;>sp|Q9R207|NBN_MOUSE Nibrin OS=Mus musculus GN=Nbn PE=1 SV=1	2	1	1	1	1	0	0	0	0	0	0	0	0	0	0	0	1	0	0	0	0	0	0	0	0	0	0	0	1	0	0	0	0	0	0	0	0	0	0	0	2.5	2.5	2.5	83.794	751
A2AMH5;A2AMH4;Q6X893-2;F8WH94;Q6X893;A2AMH3;A2AMH8	A2AMH5;A2AMH4;Q6X893-2;F8WH94;Q6X893;A2AMH3	Choline transporter-like protein 1	Slc44a1	>tr|A2AMH5|A2AMH5_MOUSE Choline transporter-like protein 1 OS=Mus musculus GN=Slc44a1 PE=4 SV=1;>tr|A2AMH4|A2AMH4_MOUSE Choline transporter-like protein 1 OS=Mus musculus GN=Slc44a1 PE=4 SV=1;>sp|Q6X893-2|CTL1_MOUSE Isoform 2 of Choline transporter-like pr	7	20	20	20	9	13	13	17	17	17	16	13	14	18	18	17	9	13	13	17	17	17	16	13	14	18	18	17	9	13	13	17	17	17	16	13	14	18	18	17	36.6	36.6	36.6	73.044	656
A2AMN4;Q8BH69	A2AMN4;Q8BH69	Selenide, water dikinase 1	Sephs1	>tr|A2AMN4|A2AMN4_MOUSE Selenophosphate synthetase 1 OS=Mus musculus GN=Sephs1 PE=4 SV=1;>sp|Q8BH69|SPS1_MOUSE Selenide, water dikinase 1 OS=Mus musculus GN=Sephs1 PE=2 SV=1	2	6	6	6	4	6	6	2	2	1	6	5	6	1	1	3	4	6	6	2	2	1	6	5	6	1	1	3	4	6	6	2	2	1	6	5	6	1	1	3	15.3	15.3	15.3	42.906	392
A2AMQ1;Q8CIB6	A2AMQ1;Q8CIB6	UPF0414 transmembrane protein C20orf30 homolog	5730494N06Rik	>tr|A2AMQ1|A2AMQ1_MOUSE MCG15179 OS=Mus musculus GN=5730494N06Rik PE=4 SV=1;>sp|Q8CIB6|TM230_MOUSE Transmembrane protein 230 OS=Mus musculus GN=Tmem230 PE=1 SV=1	2	4	4	4	1	1	0	4	3	1	1	1	2	3	3	3	1	1	0	4	3	1	1	1	2	3	3	3	1	1	0	4	3	1	1	1	2	3	3	3	37.5	37.5	37.5	13.188	120
A2AMQ4;Q99L43;A2AMQ5;F6S4G2;Q6PBC0;H3BKR7	A2AMQ4;Q99L43;A2AMQ5;F6S4G2;Q6PBC0	Phosphatidate cytidylyltransferase;Phosphatidate cytidylyltransferase 2	Cds2	>tr|A2AMQ4|A2AMQ4_MOUSE Phosphatidate cytidylyltransferase OS=Mus musculus GN=Cds2 PE=3 SV=1;>sp|Q99L43|CDS2_MOUSE Phosphatidate cytidylyltransferase 2 OS=Mus musculus GN=Cds2 PE=1 SV=1;>tr|A2AMQ5|A2AMQ5_MOUSE Phosphatidate cytidylyltransferase OS=Mus musc	6	10	9	9	7	5	7	7	5	5	6	6	6	9	9	8	6	4	6	6	4	4	5	5	5	8	8	7	6	4	6	6	4	4	5	5	5	8	8	7	34.2	30.9	30.9	51.313	444
A2AMU9;Q9D0I8;A2AMV1	A2AMU9;Q9D0I8;A2AMV1	mRNA turnover protein 4 homolog	Mrto4	>tr|A2AMU9|A2AMU9_MOUSE MRT4, mRNA turnover 4, homolog (S. cerevisiae) OS=Mus musculus GN=Mrto4 PE=2 SV=1;>sp|Q9D0I8|MRT4_MOUSE mRNA turnover protein 4 homolog OS=Mus musculus GN=Mrto4 PE=2 SV=1;>tr|A2AMV1|A2AMV1_MOUSE MRT4, mRNA turnover 4, homolog (S. ce	3	5	5	5	3	5	2	3	2	2	4	4	5	2	1	1	3	5	2	3	2	2	4	4	5	2	1	1	3	5	2	3	2	2	4	4	5	2	1	1	21.3	21.3	21.3	27.545	239
A2AMV0;Q8C7X2-2;Q8C7X2;Q8C7X2-3	A2AMV0;Q8C7X2-2;Q8C7X2	Uncharacterized protein KIAA0090	C230096C10Rik;Kiaa0090	>tr|A2AMV0|A2AMV0_MOUSE Novel DUF1620 domain containing protein OS=Mus musculus GN=C230096C10Rik PE=4 SV=1;>sp|Q8C7X2-2|EMC1_MOUSE Isoform 2 of ER membrane protein complex subunit 1 OS=Mus musculus GN=Emc1;>sp|Q8C7X2|EMC1_MOUSE ER membrane protein complex	4	29	29	29	14	17	21	14	12	15	22	19	23	21	22	17	14	17	21	14	12	15	22	19	23	21	22	17	14	17	21	14	12	15	22	19	23	21	22	17	39.2	39.2	39.2	111.29	994
A2AMV7;P47757-2;Q923G3;A2AMW0;A2AMV5;P47757;A2AMV9;F7CAZ6;A2AMV4;F6YHZ8;A2AMV8;F6QJN8	A2AMV7;P47757-2;Q923G3;A2AMW0;A2AMV5;P47757;A2AMV9;F7CAZ6;A2AMV4;F6YHZ8;A2AMV8;F6QJN8	F-actin-capping protein subunit beta	Capzb	>tr|A2AMV7|A2AMV7_MOUSE CAPZB3 OS=Mus musculus GN=Capzb PE=2 SV=1;>sp|P47757-2|CAPZB_MOUSE Isoform 2 of F-actin-capping protein subunit beta OS=Mus musculus GN=Capzb;>tr|Q923G3|Q923G3_MOUSE Capping protein (Actin filament) muscle Z-line, beta OS=Mus muscul	12	22	22	22	16	17	17	17	17	19	14	16	18	18	18	18	16	17	17	17	17	19	14	16	18	18	18	18	16	17	17	17	17	19	14	16	18	18	18	18	67.1	67.1	67.1	33.767	301
A2AMX4;Q9D5V6	A2AMX4;Q9D5V6	Synapse-associated protein 1	Syap1	>tr|A2AMX4|A2AMX4_MOUSE Synapse associated protein 1 OS=Mus musculus GN=Syap1 PE=4 SV=1;>sp|Q9D5V6|SYAP1_MOUSE Synapse-associated protein 1 OS=Mus musculus GN=Syap1 PE=1 SV=1	2	20	20	20	15	16	16	13	12	10	15	17	12	11	11	14	15	16	16	13	12	10	15	17	12	11	11	14	15	16	16	13	12	10	15	17	12	11	11	14	63	63	63	41.349	365
A2AMY1;Q8BH48;A2AMY0;Q8BH48-2	A2AMY1;Q8BH48;A2AMY0;Q8BH48-2	Ubiquitin-associated protein 1	Ubap1	>tr|A2AMY1|A2AMY1_MOUSE Ubiquitin-associated protein 1 OS=Mus musculus GN=Ubap1 PE=4 SV=1;>sp|Q8BH48|UBAP1_MOUSE Ubiquitin-associated protein 1 OS=Mus musculus GN=Ubap1 PE=1 SV=1;>tr|A2AMY0|A2AMY0_MOUSE Ubiquitin-associated protein 1 OS=Mus musculus GN=Uba	4	3	3	3	2	1	2	1	1	1	1	2	2	0	0	0	2	1	2	1	1	1	1	2	2	0	0	0	2	1	2	1	1	1	1	2	2	0	0	0	8	8	8	55.028	502
A2AMZ4	A2AMZ4	Uncharacterized protein C17orf89 homolog		>sp|A2AMZ4|CQ089_MOUSE Uncharacterized protein C17orf89 homolog OS=Mus musculus PE=3 SV=1	1	1	1	1	0	0	0	0	0	0	1	1	0	0	1	1	0	0	0	0	0	0	1	1	0	0	1	1	0	0	0	0	0	0	1	1	0	0	1	1	18.9	18.9	18.9	7.7849	74
A2AN08;A2AN08-3;A2AN08-5;A2AN08-2;F6SSP6;A2AN08-4	A2AN08;A2AN08-3;A2AN08-5	E3 ubiquitin-protein ligase UBR4	Ubr4	>sp|A2AN08|UBR4_MOUSE E3 ubiquitin-protein ligase UBR4 OS=Mus musculus GN=Ubr4 PE=1 SV=1;>sp|A2AN08-3|UBR4_MOUSE Isoform 3 of E3 ubiquitin-protein ligase UBR4 OS=Mus musculus GN=Ubr4;>sp|A2AN08-5|UBR4_MOUSE Isoform 5 of E3 ubiquitin-protein ligase UBR4 OS=	6	110	110	110	68	72	74	35	38	31	75	83	85	46	40	39	68	72	74	35	38	31	75	83	85	46	40	39	68	72	74	35	38	31	75	83	85	46	40	39	26.1	26.1	26.1	572.28	5180
A2AN36;Q8R2R1;B0R071;B0R070	A2AN36;Q8R2R1;B0R071;B0R070	Protein O-mannosyl-transferase 1	Pomt1	>tr|A2AN36|A2AN36_MOUSE Protein-O-mannosyltransferase 1 OS=Mus musculus GN=Pomt1 PE=4 SV=1;>sp|Q8R2R1|POMT1_MOUSE Protein O-mannosyl-transferase 1 OS=Mus musculus GN=Pomt1 PE=2 SV=1;>tr|B0R071|B0R071_MOUSE Protein O-mannosyl-transferase 1 (Fragment) OS=Mus	4	3	3	3	1	1	1	0	0	1	2	1	2	1	2	2	1	1	1	0	0	1	2	1	2	1	2	2	1	1	1	0	0	1	2	1	2	1	2	2	4.7	4.7	4.7	85.233	746
A2AN37;P52623;F7CBX2	A2AN37;P52623;F7CBX2	Uridine kinase;Uridine-cytidine kinase 1	Uck1	>tr|A2AN37|A2AN37_MOUSE Uridine kinase OS=Mus musculus GN=Uck1 PE=3 SV=1;>sp|P52623|UCK1_MOUSE Uridine-cytidine kinase 1 OS=Mus musculus GN=Uck1 PE=2 SV=2;>tr|F7CBX2|F7CBX2_MOUSE Uridine-cytidine kinase 1 (Fragment) OS=Mus musculus GN=Uck1 PE=4 SV=1	3	6	6	5	4	5	5	2	3	6	6	6	6	2	2	5	4	5	5	2	3	6	6	6	6	2	2	5	3	4	4	2	2	5	5	5	5	2	1	4	28.6	28.6	24.7	31.669	283
A2AN77;Q60805	A2AN77;Q60805	Tyrosine-protein kinase Mer	Mertk	>tr|A2AN77|A2AN77_MOUSE C-mer proto-oncogene tyrosine kinase OS=Mus musculus GN=Mertk PE=4 SV=1;>sp|Q60805|MERTK_MOUSE Tyrosine-protein kinase Mer OS=Mus musculus GN=Mertk PE=1 SV=1	2	19	19	17	4	6	10	14	10	11	6	4	6	10	15	16	4	6	10	14	10	11	6	4	6	10	15	16	3	4	8	13	9	11	4	3	6	9	13	14	24.3	24.3	22.8	110.16	994
A2ANA4;Q9D8U8	A2ANA4;Q9D8U8	Sorting nexin-5	Snx5	>tr|A2ANA4|A2ANA4_MOUSE Sorting nexin 5 OS=Mus musculus GN=Snx5 PE=4 SV=1;>sp|Q9D8U8|SNX5_MOUSE Sorting nexin-5 OS=Mus musculus GN=Snx5 PE=1 SV=1	2	23	23	22	13	17	17	7	8	13	19	18	16	14	16	15	13	17	17	7	8	13	19	18	16	14	16	15	12	16	16	6	7	12	18	18	16	13	15	15	59.9	59.9	57.4	46.797	404
A2ANC6;Q80V29;Q9D742;A2ANC4	A2ANC6		2310035K24Rik	>tr|A2ANC6|A2ANC6_MOUSE Novel protein (2310035K24Rik) OS=Mus musculus GN=2310035K24Rik PE=4 SV=1	4	3	2	2	1	2	2	1	1	1	0	0	2	2	0	2	0	1	1	0	0	0	0	0	1	1	0	1	0	1	1	0	0	0	0	0	1	1	0	1	12.5	9	9	22.533	200
A2ANC9;Q8VCF0	A2ANC9;Q8VCF0	Mitochondrial antiviral-signaling protein	Mavs	>tr|A2ANC9|A2ANC9_MOUSE Novel protein (D430028G21Rik) OS=Mus musculus GN=Mavs PE=4 SV=1;>sp|Q8VCF0|MAVS_MOUSE Mitochondrial antiviral-signaling protein OS=Mus musculus GN=Mavs PE=1 SV=1	2	10	10	10	4	3	7	3	2	5	4	4	7	3	4	4	4	3	7	3	2	5	4	4	7	3	4	4	4	3	7	3	2	5	4	4	7	3	4	4	46.7	46.7	46.7	53.398	503
A2ANM1;Q9CQ65	A2ANM1;Q9CQ65	S-methyl-5-thioadenosine phosphorylase	Mtap	>tr|A2ANM1|A2ANM1_MOUSE Methylthioadenosine phosphorylase OS=Mus musculus GN=Mtap PE=4 SV=1;>sp|Q9CQ65|MTAP_MOUSE S-methyl-5-thioadenosine phosphorylase OS=Mus musculus GN=Mtap PE=2 SV=1	2	6	6	6	4	4	5	3	2	1	4	4	2	0	1	1	4	4	5	3	2	1	4	4	2	0	1	1	4	4	5	3	2	1	4	4	2	0	1	1	32.5	32.5	32.5	31.062	283
A2ANY6	A2ANY6	Midasin	Mdn1	>tr|A2ANY6|A2ANY6_MOUSE Midasin OS=Mus musculus GN=Mdn1 PE=3 SV=1	1	22	22	22	14	14	16	1	0	6	19	17	15	3	4	1	14	14	16	1	0	6	19	17	15	3	4	1	14	14	16	1	0	6	19	17	15	3	4	1	5.2	5.2	5.2	630.33	5589
A2AP24;Q8K2H2	A2AP24;Q8K2H2	OTU domain-containing protein 6B	Otud6b	>tr|A2AP24|A2AP24_MOUSE OTU domain containing 6B OS=Mus musculus GN=Otud6b PE=4 SV=2;>sp|Q8K2H2|OTU6B_MOUSE OTU domain-containing protein 6B OS=Mus musculus GN=Otud6b PE=2 SV=1	2	3	3	3	1	2	2	0	1	0	1	2	1	0	0	0	1	2	2	0	1	0	1	2	1	0	0	0	1	2	2	0	1	0	1	2	1	0	0	0	15.7	15.7	15.7	37.187	325
A2AP25;Q9CZX7	A2AP25;Q9CZX7	Transmembrane protein 55A	Tmem55a	>tr|A2AP25|A2AP25_MOUSE Transmembrane protein 55A OS=Mus musculus GN=Tmem55a PE=4 SV=1;>sp|Q9CZX7|TM55A_MOUSE Transmembrane protein 55A OS=Mus musculus GN=Tmem55a PE=1 SV=1	2	8	8	7	3	2	3	6	5	7	3	3	2	7	7	6	3	2	3	6	5	7	3	3	2	7	7	6	2	2	3	6	5	6	2	2	2	6	6	5	51.4	51.4	46.3	28.038	257
A2AP30;Q80Z37	A2AP30;Q80Z37	E3 ubiquitin-protein ligase Topors	Topors	>tr|A2AP30|A2AP30_MOUSE Topoisomerase I binding arginine/serine-rich OS=Mus musculus GN=Topors PE=4 SV=1;>sp|Q80Z37|TOPRS_MOUSE E3 ubiquitin-protein ligase Topors OS=Mus musculus GN=Topors PE=1 SV=1	2	2	2	2	1	1	1	0	0	0	0	1	2	0	0	0	1	1	1	0	0	0	0	1	2	0	0	0	1	1	1	0	0	0	0	1	2	0	0	0	2.7	2.7	2.7	117.08	1033
A2AP31;Q3UIU2;A2AP32	A2AP31;Q3UIU2;A2AP32	NADH dehydrogenase [ubiquinone] 1 beta subcomplex subunit 6	Ndufb6	>tr|A2AP31|A2AP31_MOUSE MCG9810 OS=Mus musculus GN=Ndufb6 PE=2 SV=1;>sp|Q3UIU2|NDUB6_MOUSE NADH dehydrogenase [ubiquinone] 1 beta subcomplex subunit 6 OS=Mus musculus GN=Ndufb6 PE=2 SV=3;>tr|A2AP32|A2AP32_MOUSE NADH dehydrogenase (Ubiquinone) 1 beta subcom	3	7	7	7	5	3	5	6	6	6	4	4	3	6	6	6	5	3	5	6	6	6	4	4	3	6	6	6	5	3	5	6	6	6	4	4	3	6	6	6	54.7	54.7	54.7	15.515	128
A2AP97;Q99LC2;A2APA3	A2AP97;Q99LC2	Cleavage stimulation factor subunit 1	Cstf1	>tr|A2AP97|A2AP97_MOUSE Cleavage stimulation factor, 3 pre-RNA, subunit 1 OS=Mus musculus GN=Cstf1 PE=4 SV=1;>sp|Q99LC2|CSTF1_MOUSE Cleavage stimulation factor subunit 1 OS=Mus musculus GN=Cstf1 PE=2 SV=1	3	11	11	11	7	6	8	4	3	5	6	5	8	5	4	5	7	6	8	4	3	5	6	5	8	5	4	5	7	6	8	4	3	5	6	5	8	5	4	5	35	35	35	48.381	431
A2APB0;Q8BMS9;A2APB1;A2AVI0	A2APB0;Q8BMS9;A2APB1;A2AVI0	Ras association domain-containing protein 2	Rassf2	>tr|A2APB0|A2APB0_MOUSE Ras association (RalGDS/AF-6) domain family 2 OS=Mus musculus GN=Rassf2 PE=4 SV=1;>sp|Q8BMS9|RASF2_MOUSE Ras association domain-containing protein 2 OS=Mus musculus GN=Rassf2 PE=2 SV=1;>tr|A2APB1|A2APB1_MOUSE Ras association (RalGDS	4	2	2	2	2	2	2	0	0	1	1	1	1	0	1	0	2	2	2	0	0	1	1	1	1	0	1	0	2	2	2	0	0	1	1	1	1	0	1	0	8.3	8.3	8.3	37.973	326
A2APD4;P27048;P63163;Q3UN87	A2APD4;P27048;P63163;Q3UN87	Small nuclear ribonucleoprotein-associated protein B;Small nuclear ribonucleoprotein-associated protein N	Snrpb;Snrpn	>tr|A2APD4|A2APD4_MOUSE Small nuclear ribonucleoprotein-associated protein OS=Mus musculus GN=Snrpb PE=3 SV=1;>sp|P27048|RSMB_MOUSE Small nuclear ribonucleoprotein-associated protein B OS=Mus musculus GN=Snrpb PE=1 SV=1;>sp|P63163|RSMN_MOUSE Small nuclear	4	10	10	10	6	6	7	2	3	0	7	8	7	3	4	4	6	6	7	2	3	0	7	8	7	3	4	4	6	6	7	2	3	0	7	8	7	3	4	4	41.1	41.1	41.1	23.656	231
A2APD6;Q9D6Z1;F7CHQ7;E0CXZ0;F7CHP9;F6USW7	A2APD6;Q9D6Z1	Nucleolar protein 56	Nop56	>tr|A2APD6|A2APD6_MOUSE MCG9901, isoform CRA_a OS=Mus musculus GN=Nop56 PE=4 SV=1;>sp|Q9D6Z1|NOP56_MOUSE Nucleolar protein 56 OS=Mus musculus GN=Nop56 PE=1 SV=2	6	29	29	14	18	20	21	7	10	8	25	25	25	9	11	12	18	20	21	7	10	8	25	25	25	9	11	12	10	10	11	5	4	4	12	13	11	6	6	7	59.8	59.8	30.3	64.464	580
A2APF6;Q9Z2V4	A2APF6;Q9Z2V4	Phosphoenolpyruvate carboxykinase, cytosolic [GTP]	Pck1	>tr|A2APF6|A2APF6_MOUSE Phosphoenolpyruvate carboxykinase 1, cytosolic OS=Mus musculus GN=Pck1 PE=3 SV=1;>sp|Q9Z2V4|PCKGC_MOUSE Phosphoenolpyruvate carboxykinase, cytosolic [GTP] OS=Mus musculus GN=Pck1 PE=2 SV=1	2	32	32	31	24	26	25	12	12	12	26	23	25	18	17	15	24	26	25	12	12	12	26	23	25	18	17	15	23	25	24	11	11	12	25	22	24	17	16	14	63.3	63.3	63.3	69.354	622
A2APF7;Q9QY24;A2APF8;Q9QY24-2	A2APF7;Q9QY24	Z-DNA-binding protein 1	Zbp1	>tr|A2APF7|A2APF7_MOUSE Z-DNA binding protein 1 OS=Mus musculus GN=Zbp1 PE=4 SV=1;>sp|Q9QY24|ZBP1_MOUSE Z-DNA-binding protein 1 OS=Mus musculus GN=Zbp1 PE=1 SV=1	4	7	7	7	6	5	7	0	0	0	3	4	5	0	0	0	6	5	7	0	0	0	3	4	5	0	0	0	6	5	7	0	0	0	3	4	5	0	0	0	24.8	24.8	24.8	44.271	411
A2APM2;P15379;E9QKL7;P15379-7;E9QKL8;P15379-8;A2APM1;P15379-4;E9QKL9;E9QKM0;P15379-9;P15379-10;Q80X37;E9QKM8;P15379-5;P15379-11;A2APM4;P15379-6;A2APM3;P15379-3;A2APM5;Q3U8S1;P15379-2;A2APM6;E9QKM1;P15379-13;P15379-12	A2APM2;P15379;E9QKL7;P15379-7;E9QKL8;P15379-8;A2APM1;P15379-4;E9QKL9;E9QKM0;P15379-9;P15379-10;Q80X37;E9QKM8;P15379-5;P15379-11;A2APM4;P15379-6;A2APM3;P15379-3;A2APM5;Q3U8S1;P15379-2;A2APM6	CD44 antigen	Cd44	>tr|A2APM2|A2APM2_MOUSE CD44 antigen OS=Mus musculus GN=Cd44 PE=4 SV=1;>sp|P15379|CD44_MOUSE CD44 antigen OS=Mus musculus GN=Cd44 PE=1 SV=3;>tr|E9QKL7|E9QKL7_MOUSE CD44 antigen OS=Mus musculus GN=Cd44 PE=4 SV=1;>sp|P15379-7|CD44_MOUSE Isoform 2 of CD44 ant	27	8	8	8	4	6	5	5	6	5	4	5	3	4	6	5	4	6	5	5	6	5	4	5	3	4	6	5	4	6	5	5	6	5	4	5	3	4	6	5	16.8	16.8	16.8	85.837	780
A2APX2;P21460;A2APX3	A2APX2;P21460	Cystatin-C	Cst3	>tr|A2APX2|A2APX2_MOUSE Cystatin C OS=Mus musculus GN=Cst3 PE=4 SV=1;>sp|P21460|CYTC_MOUSE Cystatin-C OS=Mus musculus GN=Cst3 PE=2 SV=2	3	3	3	3	1	1	2	0	1	0	1	2	2	1	1	1	1	1	2	0	1	0	1	2	2	1	1	1	1	1	2	0	1	0	1	2	2	1	1	1	34.3	34.3	34.3	15.531	140
A2APY6;Q3V1V3	A2APY6;Q3V1V3	ESF1 homolog	Esf1	>tr|A2APY6|A2APY6_MOUSE ESF1, nucleolar pre-rRNA processing protein, homolog (S. cerevisiae) OS=Mus musculus GN=Esf1 PE=2 SV=1;>sp|Q3V1V3|ESF1_MOUSE ESF1 homolog OS=Mus musculus GN=Esf1 PE=1 SV=1	2	4	4	4	1	3	3	0	0	0	3	3	4	0	0	0	1	3	3	0	0	0	3	3	4	0	0	0	1	3	3	0	0	0	3	3	4	0	0	0	5.6	5.6	5.6	98.047	845
A2APY7	A2APY7	Probable methyltransferase C20orf7 homolog, mitochondrial		>sp|A2APY7|NDUF5_MOUSE NADH dehydrogenase [ubiquinone] 1 alpha subcomplex assembly factor 5 OS=Mus musculus PE=2 SV=1	1	5	5	3	4	4	4	1	0	1	3	4	2	2	3	3	4	4	4	1	0	1	3	4	2	2	3	3	3	3	2	1	0	1	2	2	1	1	2	2	19.2	19.2	9.6	38.404	343
A2APZ5;Q91ZU1	A2APZ5;Q91ZU1	Ankyrin repeat and SOCS box protein 6	Asb6	>tr|A2APZ5|A2APZ5_MOUSE Ankyrin repeat and SOCS box-containing protein 6 OS=Mus musculus GN=Asb6 PE=4 SV=1;>sp|Q91ZU1|ASB6_MOUSE Ankyrin repeat and SOCS box protein 6 OS=Mus musculus GN=Asb6 PE=1 SV=1	2	3	3	3	2	2	3	1	1	1	2	2	3	0	1	1	2	2	3	1	1	1	2	2	3	0	1	1	2	2	3	1	1	1	2	2	3	0	1	1	8.6	8.6	8.6	46.276	418
A2AQ13;P61022;B0R091;B0R092	A2AQ13;P61022;B0R091	Calcium-binding protein p22	1500003O03Rik;Chp	>tr|A2AQ13|A2AQ13_MOUSE MCG9726, isoform CRA_e OS=Mus musculus GN=1500003O03Rik PE=4 SV=1;>sp|P61022|CHP1_MOUSE Calcium-binding protein p22 OS=Mus musculus GN=Chp PE=2 SV=2;>tr|B0R091|B0R091_MOUSE Novel protein (1500003O03Rik) OS=Mus musculus GN=1500003O03	4	13	13	13	10	9	13	9	11	10	11	8	13	12	12	11	10	9	13	9	11	10	11	8	13	12	12	11	10	9	13	9	11	10	11	8	13	12	12	11	65.6	65.6	65.6	22.432	195
A2AQ17;Q9CWX2	A2AQ17;Q9CWX2	Complex I intermediate-associated protein 30, mitochondrial	Ndufaf1	>tr|A2AQ17|A2AQ17_MOUSE Complex I intermediate-associated protein 30, mitochondrial OS=Mus musculus GN=Ndufaf1 PE=4 SV=1;>sp|Q9CWX2|CIA30_MOUSE Complex I intermediate-associated protein 30, mitochondrial OS=Mus musculus GN=Ndufaf1 PE=2 SV=2	2	15	15	15	6	7	9	5	5	4	6	7	7	5	7	6	6	7	9	5	5	4	6	7	7	5	7	6	6	7	9	5	5	4	6	7	7	5	7	6	48.5	48.5	48.5	37.782	328
A2AQ19	A2AQ19	RNA polymerase-associated protein RTF1 homolog	Rtf1	>sp|A2AQ19|RTF1_MOUSE RNA polymerase-associated protein RTF1 homolog OS=Mus musculus GN=Rtf1 PE=2 SV=1	1	2	2	2	2	1	2	1	1	0	1	2	0	1	0	1	2	1	2	1	1	0	1	2	0	1	0	1	2	1	2	1	1	0	1	2	0	1	0	1	3.2	3.2	3.2	80.796	715
A2AQ53;Q61554;Q61555	A2AQ53;Q61554	Fibrillin-1	Fbn1	>tr|A2AQ53|A2AQ53_MOUSE Fibrillin 1 OS=Mus musculus GN=Fbn1 PE=4 SV=1;>sp|Q61554|FBN1_MOUSE Fibrillin-1 OS=Mus musculus GN=Fbn1 PE=1 SV=1	3	54	54	54	21	27	21	11	10	17	38	33	43	24	26	21	21	27	21	11	10	17	38	33	43	24	26	21	21	27	21	11	10	17	38	33	43	24	26	21	25.7	25.7	25.7	312.3	2873
A2AQA6;Q8CFQ3;A2AQA7	A2AQA6;Q8CFQ3;A2AQA7	Intron-binding protein aquarius	Aqr	>tr|A2AQA6|A2AQA6_MOUSE Aquarius OS=Mus musculus GN=Aqr PE=4 SV=1;>sp|Q8CFQ3|AQR_MOUSE Intron-binding protein aquarius OS=Mus musculus GN=Aqr PE=2 SV=2;>tr|A2AQA7|A2AQA7_MOUSE Aquarius OS=Mus musculus GN=Aqr PE=4 SV=1	3	16	16	16	10	9	13	4	4	2	13	11	13	4	4	4	10	9	13	4	4	2	13	11	13	4	4	4	10	9	13	4	4	2	13	11	13	4	4	4	12.3	12.3	12.3	170.29	1481
A2AQB0;Q6PR54-3;Q6PR54;Q6PR54-2	A2AQB0;Q6PR54-3;Q6PR54;Q6PR54-2	Telomere-associated protein RIF1	Rif1	>tr|A2AQB0|A2AQB0_MOUSE Rap1 interacting factor 1 homolog (Yeast) OS=Mus musculus GN=Rif1 PE=4 SV=1;>sp|Q6PR54-3|RIF1_MOUSE Isoform 3 of Telomere-associated protein RIF1 OS=Mus musculus GN=Rif1;>sp|Q6PR54|RIF1_MOUSE Telomere-associated protein RIF1 OS=Mus	4	2	2	2	2	2	2	0	0	0	1	2	2	0	0	0	2	2	2	0	0	0	1	2	2	0	0	0	2	2	2	0	0	0	1	2	2	0	0	0	0.6	0.6	0.6	267.14	2426
A2AQC3;O70228;Q8C288;Q8C4G3;A2AQC9;A2AUZ0;A2AUZ1;B2FDH4	A2AQC3;O70228;Q8C288;Q8C4G3	Probable phospholipid-transporting ATPase IIA	Atp9a	>tr|A2AQC3|A2AQC3_MOUSE ATPase, class II, type 9A OS=Mus musculus GN=Atp9a PE=4 SV=1;>sp|O70228|ATP9A_MOUSE Probable phospholipid-transporting ATPase IIA OS=Mus musculus GN=Atp9a PE=2 SV=3;>tr|Q8C288|Q8C288_MOUSE ATPase, class II, type 9A OS=Mus musculus G	8	33	33	29	13	15	14	22	18	21	13	12	11	27	26	31	13	15	14	22	18	21	13	12	11	27	26	31	11	13	12	19	14	18	12	11	9	24	23	27	31.7	31.7	29	124.46	1105
A2AQE2;Q6A098;E9Q1S2	A2AQE2;Q6A098;E9Q1S2	Selenocysteine insertion sequence-binding protein 2-like	Secisbp2l	>tr|A2AQE2|A2AQE2_MOUSE Novel protein OS=Mus musculus GN=Secisbp2l PE=2 SV=1;>sp|Q6A098|SBP2L_MOUSE Selenocysteine insertion sequence-binding protein 2-like OS=Mus musculus GN=Secisbp2l PE=1 SV=2;>tr|E9Q1S2|E9Q1S2_MOUSE Selenocysteine insertion sequence-bi	3	2	2	2	2	0	1	0	0	0	1	1	1	0	0	0	2	0	1	0	0	0	1	1	1	0	0	0	2	0	1	0	0	0	1	1	1	0	0	0	3.6	3.6	3.6	119.75	1089
A2AQH9;Q99LI7	A2AQH9;Q99LI7	Cleavage stimulation factor subunit 3	Cstf3	>tr|A2AQH9|A2AQH9_MOUSE Cleavage stimulation factor, 3 pre-RNA, subunit 3 OS=Mus musculus GN=Cstf3 PE=4 SV=1;>sp|Q99LI7|CSTF3_MOUSE Cleavage stimulation factor subunit 3 OS=Mus musculus GN=Cstf3 PE=1 SV=1	2	13	13	13	6	7	7	3	3	4	6	5	7	2	3	4	6	7	7	3	3	4	6	5	7	2	3	4	6	7	7	3	3	4	6	5	7	2	3	4	23.4	23.4	23.4	82.876	717
A2AQJ6;A2AQJ5;Q8BXN9-2;Q8BXN9;A2AQJ7;Q8BXN9-3	A2AQJ6;A2AQJ5;Q8BXN9-2;Q8BXN9;A2AQJ7;Q8BXN9-3	Transmembrane protein 87A	Tmem87a	>tr|A2AQJ6|A2AQJ6_MOUSE Transmembrane protein 87A OS=Mus musculus GN=Tmem87a PE=4 SV=1;>tr|A2AQJ5|A2AQJ5_MOUSE Transmembrane protein 87A OS=Mus musculus GN=Tmem87a PE=4 SV=1;>sp|Q8BXN9-2|TM87A_MOUSE Isoform 2 of Transmembrane protein 87A OS=Mus musculus GN	6	11	11	11	6	6	6	10	8	8	7	6	5	8	8	7	6	6	6	10	8	8	7	6	5	8	8	7	6	6	6	10	8	8	7	6	5	8	8	7	22.1	22.1	22.1	63.888	560
A2AQJ8;Q8BVW0;Q8BVW0-2	A2AQJ8;Q8BVW0	Neutral alpha-glucosidase C	Ganc	>tr|A2AQJ8|A2AQJ8_MOUSE Glucosidase alpha neutral C OS=Mus musculus GN=Ganc PE=4 SV=1;>sp|Q8BVW0|GANC_MOUSE Neutral alpha-glucosidase C OS=Mus musculus GN=Ganc PE=2 SV=2	3	3	3	3	2	1	1	1	1	1	1	1	1	1	1	1	2	1	1	1	1	1	1	1	1	1	1	1	2	1	1	1	1	1	1	1	1	1	1	1	4.4	4.4	4.4	103.71	913
A2AQL0;Q9Z1W9	A2AQL0;Q9Z1W9	STE20/SPS1-related proline-alanine-rich protein kinase	Stk39	>tr|A2AQL0|A2AQL0_MOUSE Serine/threonine kinase 39, STE20/SPS1 homolog (Yeast) OS=Mus musculus GN=Stk39 PE=4 SV=1;>sp|Q9Z1W9|STK39_MOUSE STE20/SPS1-related proline-alanine-rich protein kinase OS=Mus musculus GN=Stk39 PE=1 SV=1	2	14	11	11	6	10	9	3	4	5	12	10	7	9	8	8	5	7	6	2	2	4	9	8	5	7	5	5	5	7	6	2	2	4	9	8	5	7	5	5	32.6	25.2	25.2	60.319	556
A2AQL6;P70195	A2AQL6;P70195	Proteasome subunit beta type;Proteasome subunit beta type-7	Psmb7	>tr|A2AQL6|A2AQL6_MOUSE Proteasome subunit beta type OS=Mus musculus GN=Psmb7 PE=3 SV=1;>sp|P70195|PSB7_MOUSE Proteasome subunit beta type-7 OS=Mus musculus GN=Psmb7 PE=1 SV=1	2	13	13	13	9	8	7	8	8	7	7	5	6	12	13	13	9	8	7	8	8	7	7	5	6	12	13	13	9	8	7	8	8	7	7	5	6	12	13	13	44	44	44	29.891	277
A2AQN4;Q9QXG4;A2AQN5;D6RHA7	A2AQN4;Q9QXG4;A2AQN5	Acetyl-coenzyme A synthetase, cytoplasmic	Acss2	>tr|A2AQN4|A2AQN4_MOUSE Acetyl-coenzyme A synthetase, cytoplasmic OS=Mus musculus GN=Acss2 PE=4 SV=1;>sp|Q9QXG4|ACSA_MOUSE Acetyl-coenzyme A synthetase, cytoplasmic OS=Mus musculus GN=Acss2 PE=1 SV=2;>tr|A2AQN5|A2AQN5_MOUSE Acetyl-coenzyme A synthetase, cy	4	16	16	10	8	12	12	8	8	6	10	12	8	8	8	9	8	12	12	8	8	6	10	12	8	8	8	9	5	7	7	4	3	2	6	8	5	4	4	6	31.8	31.8	20.6	80.386	714
A2AQP9;Q6ZPV2;D3YWI6;Q6ZPV2-2	A2AQP9;Q6ZPV2;D3YWI6;Q6ZPV2-2	DNA helicase INO80	Ino80	>tr|A2AQP9|A2AQP9_MOUSE INO80 homolog (S. cerevisiae) OS=Mus musculus GN=Ino80 PE=4 SV=1;>sp|Q6ZPV2|INO80_MOUSE DNA helicase INO80 OS=Mus musculus GN=Ino80 PE=2 SV=2;>tr|D3YWI6|D3YWI6_MOUSE DNA helicase INO80 OS=Mus musculus GN=Ino80 PE=4 SV=2;>sp|Q6ZPV2-2	4	2	2	2	0	0	1	0	0	0	1	1	2	0	0	0	0	0	1	0	0	0	1	1	2	0	0	0	0	0	1	0	0	0	1	1	2	0	0	0	1.5	1.5	1.5	176.52	1559
A2AQR0;Q64521	A2AQR0;Q64521	Glycerol-3-phosphate dehydrogenase, mitochondrial	Gpd2	>tr|A2AQR0|A2AQR0_MOUSE Glycerol phosphate dehydrogenase 2, mitochondrial OS=Mus musculus GN=Gpd2 PE=3 SV=1;>sp|Q64521|GPDM_MOUSE Glycerol-3-phosphate dehydrogenase, mitochondrial OS=Mus musculus GN=Gpd2 PE=1 SV=2	2	58	58	58	40	38	44	46	40	42	44	43	46	51	52	49	40	38	44	46	40	42	44	43	46	51	52	49	40	38	44	46	40	42	44	43	46	51	52	49	77.7	77.7	77.7	82.829	745
A2AQU8;Q9D975	A2AQU8;Q9D975	Sulfiredoxin-1	Srxn1	>tr|A2AQU8|A2AQU8_MOUSE Sulfiredoxin 1 homolog (S. cerevisiae) OS=Mus musculus GN=Srxn1 PE=4 SV=1;>sp|Q9D975|SRXN1_MOUSE Sulfiredoxin-1 OS=Mus musculus GN=Srxn1 PE=2 SV=1	2	6	6	6	4	5	5	3	1	2	4	5	0	2	0	0	4	5	5	3	1	2	4	5	0	2	0	0	4	5	5	3	1	2	4	5	0	2	0	0	71.6	71.6	71.6	16.063	155
A2AQW5;Q9R1C7;Q9R1C7-2;A2AQW6	A2AQW5;Q9R1C7;Q9R1C7-2	Pre-mRNA-processing factor 40 homolog A	Prpf40a	>tr|A2AQW5|A2AQW5_MOUSE PRP40 pre-mRNA processing factor 40 homolog A (Yeast) OS=Mus musculus GN=Prpf40a PE=4 SV=1;>sp|Q9R1C7|PR40A_MOUSE Pre-mRNA-processing factor 40 homolog A OS=Mus musculus GN=Prpf40a PE=1 SV=1;>sp|Q9R1C7-2|PR40A_MOUSE Isoform 2 of Pre	4	20	20	19	13	13	17	3	5	4	14	17	19	7	6	5	13	13	17	3	5	4	14	17	19	7	6	5	13	13	16	3	5	4	14	16	18	7	6	5	24.7	24.7	24.7	108.48	953
A2AQY3;O88967	A2AQY3;O88967	ATP-dependent zinc metalloprotease YME1L1	Yme1l1	>tr|A2AQY3|A2AQY3_MOUSE YME1-like 1 (S. cerevisiae) OS=Mus musculus GN=Yme1l1 PE=3 SV=1;>sp|O88967|YMEL1_MOUSE ATP-dependent zinc metalloprotease YME1L1 OS=Mus musculus GN=Yme1l1 PE=2 SV=1	2	16	16	16	8	12	10	8	9	8	10	9	12	9	10	11	8	12	10	8	9	8	10	9	12	9	10	11	8	12	10	8	9	8	10	9	12	9	10	11	31.3	31.3	31.3	80.027	715
A2AQY6;Q3UHX9;Q3UHX9-2	A2AQY6;Q3UHX9;Q3UHX9-2	Uncharacterized protein C9orf114 homolog	D2Wsu81e	>tr|A2AQY6|A2AQY6_MOUSE DNA segment Chr 2 Wayne State University 81 expressed OS=Mus musculus GN=D2Wsu81e PE=4 SV=1;>sp|Q3UHX9|CI114_MOUSE Uncharacterized protein C9orf114 homolog OS=Mus musculus GN=D2Wsu81e PE=2 SV=1;>sp|Q3UHX9-2|CI114_MOUSE Isoform 2 of	3	2	2	2	1	2	1	0	0	0	2	2	2	1	0	0	1	2	1	0	0	0	2	2	2	1	0	0	1	2	1	0	0	0	2	2	2	1	0	0	5.5	5.5	5.5	42.957	385
A2AR02;A2AR01	A2AR02;A2AR01	Peptidyl-prolyl cis-trans isomerase G;Peptidyl-prolyl cis-trans isomerase	Ppig	>sp|A2AR02|PPIG_MOUSE Peptidyl-prolyl cis-trans isomerase G OS=Mus musculus GN=Ppig PE=1 SV=1;>tr|A2AR01|A2AR01_MOUSE Peptidyl-prolyl cis-trans isomerase (Fragment) OS=Mus musculus GN=Ppig PE=3 SV=1	2	5	5	5	3	3	2	0	0	0	3	3	5	1	0	0	3	3	2	0	0	0	3	3	5	1	0	0	3	3	2	0	0	0	3	3	5	1	0	0	8.2	8.2	8.2	88.324	752
A2AR24;Q8BG21;Q8BG21-2;A6PWX1;Q8BG21-3	A2AR24;Q8BG21;Q8BG21-2;A6PWX1;Q8BG21-3	Calcium channel flower homolog	5930434B04Rik	>tr|A2AR24|A2AR24_MOUSE Likely ortholog of H. sapiens chromosome 9 open reading frame 7 (C9orf7) OS=Mus musculus GN=5930434B04Rik PE=4 SV=1;>sp|Q8BG21|FLOWR_MOUSE Calcium channel flower homolog OS=Mus musculus GN=Cacfd1 PE=2 SV=1;>sp|Q8BG21-2|FLOWR_MOUSE I	5	2	2	2	1	1	1	2	2	1	0	1	0	2	2	1	1	1	1	2	2	1	0	1	0	2	2	1	1	1	1	2	2	1	0	1	0	2	2	1	27.5	27.5	27.5	18.343	171
A2AR77;O35593;F6SAH4	A2AR77;O35593;F6SAH4	26S proteasome non-ATPase regulatory subunit 14	Psmd14	>tr|A2AR77|A2AR77_MOUSE Proteasome (Prosome, macropain) 26S subunit, non-ATPase, 14 OS=Mus musculus GN=Psmd14 PE=4 SV=1;>sp|O35593|PSDE_MOUSE 26S proteasome non-ATPase regulatory subunit 14 OS=Mus musculus GN=Psmd14 PE=1 SV=2;>tr|F6SAH4|F6SAH4_MOUSE 26S pr	3	8	8	8	6	7	8	7	5	6	7	7	7	7	7	7	6	7	8	7	5	6	7	7	7	7	7	7	6	7	8	7	5	6	7	7	7	7	7	7	28.7	28.7	28.7	34.577	310
A2AR99;Q9R1W5	A2AR99;Q9R1W5	Calcitonin gene-related peptide type 1 receptor	Calcrl	>tr|A2AR99|A2AR99_MOUSE Calcitonin receptor-like OS=Mus musculus GN=Calcrl PE=2 SV=1;>sp|Q9R1W5|CALRL_MOUSE Calcitonin gene-related peptide type 1 receptor OS=Mus musculus GN=Calcrl PE=2 SV=2	2	3	3	3	0	0	0	3	3	1	0	0	0	2	3	3	0	0	0	3	3	1	0	0	0	2	3	3	0	0	0	3	3	1	0	0	0	2	3	3	7.3	7.3	7.3	53.264	463
A2ARA8;G3UYN5	A2ARA8;G3UYN5	Integrin alpha-8;Integrin alpha-8 heavy chain;Integrin alpha-8 light chain	Itga8	>sp|A2ARA8|ITA8_MOUSE Integrin alpha-8 OS=Mus musculus GN=Itga8 PE=1 SV=1;>tr|G3UYN5|G3UYN5_MOUSE Integrin alpha-8 OS=Mus musculus GN=Itga8 PE=3 SV=1	2	6	6	6	1	2	1	5	3	3	1	2	2	3	5	3	1	2	1	5	3	3	1	2	2	3	5	3	1	2	1	5	3	3	1	2	2	3	5	3	8.9	8.9	8.9	117.55	1062
A2ARC5;Q91VE0	A2ARC5;Q91VE0	Long-chain fatty acid transport protein 4	Slc27a4	>tr|A2ARC5|A2ARC5_MOUSE Solute carrier family 27 (Fatty acid transporter), member 4 OS=Mus musculus GN=Slc27a4 PE=4 SV=1;>sp|Q91VE0|S27A4_MOUSE Long-chain fatty acid transport protein 4 OS=Mus musculus GN=Slc27a4 PE=1 SV=1	2	45	45	44	35	34	36	36	31	33	39	41	44	42	42	42	35	34	36	36	31	33	39	41	44	42	42	42	34	33	35	35	30	32	38	40	43	41	41	41	68.9	68.9	66.7	72.318	643
A2ARD6;Q9CXF0;Q6NSV5;Q3V3G5;A2ARD7;Q8R0F7	A2ARD6;Q9CXF0;Q6NSV5;Q3V3G5;A2ARD7;Q8R0F7	Kynureninase	Kynu	>tr|A2ARD6|A2ARD6_MOUSE Kynureninase OS=Mus musculus GN=Kynu PE=3 SV=1;>sp|Q9CXF0|KYNU_MOUSE Kynureninase OS=Mus musculus GN=Kynu PE=2 SV=3;>tr|Q6NSV5|Q6NSV5_MOUSE Kynureninase OS=Mus musculus GN=Kynu PE=2 SV=1;>tr|Q3V3G5|Q3V3G5_MOUSE Kynureninase OS=Mus m	6	3	3	3	2	1	2	1	1	1	1	2	1	0	0	0	2	1	2	1	1	1	1	2	1	0	0	0	2	1	2	1	1	1	1	2	1	0	0	0	8.6	8.6	8.6	52.456	465
A2ARI2;O88952;O88951	A2ARI2;O88952	Protein lin-7 homolog C	Lin7c	>tr|A2ARI2|A2ARI2_MOUSE Lin-7 homolog C (C. elegans) OS=Mus musculus GN=Lin7c PE=4 SV=1;>sp|O88952|LIN7C_MOUSE Protein lin-7 homolog C OS=Mus musculus GN=Lin7c PE=1 SV=2	3	10	10	7	9	8	8	8	7	9	8	9	7	9	10	9	9	8	8	8	7	9	8	9	7	9	10	9	6	5	5	5	5	6	5	6	4	6	7	6	72.1	72.1	46.7	21.834	197
A2ARI4;A2ARI3	A2ARI4;A2ARI3	Leucine-rich repeat-containing G-protein coupled receptor 4	Lgr4	>sp|A2ARI4|LGR4_MOUSE Leucine-rich repeat-containing G-protein coupled receptor 4 OS=Mus musculus GN=Lgr4 PE=2 SV=1;>tr|A2ARI3|A2ARI3_MOUSE Leucine-rich repeat-containing G protein-coupled receptor 4 OS=Mus musculus GN=Lgr4 PE=4 SV=1	2	7	7	7	1	1	1	6	4	4	1	1	1	6	7	6	1	1	1	6	4	4	1	1	1	6	7	6	1	1	1	6	4	4	1	1	1	6	7	6	8.5	8.5	8.5	104.15	951
A2ARJ3	A2ARJ3	Transmembrane protein 236	Tmem236	>sp|A2ARJ3|TM236_MOUSE Transmembrane protein 236 OS=Mus musculus GN=Tmem236 PE=3 SV=1	1	9	9	9	7	8	8	8	8	8	6	5	8	9	9	9	7	8	8	8	8	8	6	5	8	9	9	9	7	8	8	8	8	8	6	5	8	9	9	9	30.8	30.8	30.8	38.679	344
A2ARP8;Q9QYR6-2;Q9QYR6	A2ARP8;Q9QYR6-2;Q9QYR6	Microtubule-associated protein 1A;MAP1 light chain LC2	Mtap1a;Map1a	>tr|A2ARP8|A2ARP8_MOUSE Microtubule-associated protein 1 A OS=Mus musculus GN=Mtap1a PE=4 SV=1;>sp|Q9QYR6-2|MAP1A_MOUSE Isoform 2 of Microtubule-associated protein 1A OS=Mus musculus GN=Map1a;>sp|Q9QYR6|MAP1A_MOUSE Microtubule-associated protein 1A OS=Mus	3	5	5	5	1	5	4	0	0	0	5	5	5	1	2	2	1	5	4	0	0	0	5	5	5	1	2	2	1	5	4	0	0	0	5	5	5	1	2	2	2.8	2.8	2.8	325.88	3014
A2ARQ4;D6RIP7;P84102;D6RCY2;A2ARQ2	A2ARQ4;D6RIP7;P84102;D6RCY2;A2ARQ2	Small EDRK-rich factor 2	Serf2	>tr|A2ARQ4|A2ARQ4_MOUSE Small EDRK-rich factor 2 OS=Mus musculus GN=Serf2 PE=4 SV=1;>tr|D6RIP7|D6RIP7_MOUSE Small EDRK-rich factor 2 OS=Mus musculus GN=Serf2 PE=4 SV=1;>sp|P84102|SERF2_MOUSE Small EDRK-rich factor 2 OS=Mus musculus GN=Serf2 PE=2 SV=1;>tr|D	5	1	1	1	1	1	1	0	0	0	1	1	1	1	0	1	1	1	1	0	0	0	1	1	1	1	0	1	1	1	1	0	0	0	1	1	1	1	0	1	9	9	9	14.373	133
A2ARQ7;Q9CR41;Q9CR41-2	A2ARQ7;Q9CR41;Q9CR41-2	Huntingtin-interacting protein K	2310003F16Rik;Hypk	>tr|A2ARQ7|A2ARQ7_MOUSE Novel protein (2310003F16Rik) OS=Mus musculus GN=2310003F16Rik PE=4 SV=1;>sp|Q9CR41|HYPK_MOUSE Huntingtin-interacting protein K OS=Mus musculus GN=Hypk PE=2 SV=2;>sp|Q9CR41-2|HYPK_MOUSE Isoform 2 of Huntingtin-interacting protein K	3	3	3	3	2	2	3	1	0	0	1	1	2	0	0	0	2	2	3	1	0	0	1	1	2	0	0	0	2	2	3	1	0	0	1	1	2	0	0	0	31.8	31.8	31.8	14.679	129
A2ARQ8;Q9CQU1	A2ARQ8;Q9CQU1	Microfibrillar-associated protein 1	Mfap1b;Mfap1	>tr|A2ARQ8|A2ARQ8_MOUSE Microfibrillar-associated protein 1A OS=Mus musculus GN=Mfap1b PE=4 SV=1;>sp|Q9CQU1|MFAP1_MOUSE Microfibrillar-associated protein 1 OS=Mus musculus GN=Mfap1 PE=1 SV=1	2	7	7	7	6	6	6	1	0	0	7	7	6	1	2	0	6	6	6	1	0	0	7	7	6	1	2	0	6	6	6	1	0	0	7	7	6	1	2	0	21.4	21.4	21.4	51.954	439
A2ARY4;Q8VGR9	A2ARY4;Q8VGR9	Olfactory receptor 1044	Olfr1044	>tr|A2ARY4|A2ARY4_MOUSE Olfactory receptor 1044 OS=Mus musculus GN=Olfr1044 PE=3 SV=1;>sp|Q8VGR9|O1044_MOUSE Olfactory receptor 1044 OS=Mus musculus GN=Olfr1044 PE=2 SV=1	2	1	1	1	0	1	1	0	0	0	0	1	1	0	0	0	0	1	1	0	0	0	0	1	1	0	0	0	0	1	1	0	0	0	0	1	1	0	0	0	7.6	7.6	7.6	35.612	314
A2ARZ3;E9QN02;REV__P60330	A2ARZ3	Fibrous sheath-interacting protein 2	Fsip2	>sp|A2ARZ3|FSIP2_MOUSE Fibrous sheath-interacting protein 2 OS=Mus musculus GN=Fsip2 PE=1 SV=3	3	7	7	7	1	3	3	3	2	2	3	3	3	4	3	3	1	3	3	3	2	2	3	3	3	4	3	3	1	3	3	3	2	2	3	3	3	4	3	3	1.2	1.2	1.2	784.85	6995
A2AS03;E9QAM5;A2AS05;E9Q8D9;E9Q7J7	A2AS03;E9QAM5;A2AS05;E9Q8D9		BC006779	>tr|A2AS03|A2AS03_MOUSE Novel protein, possible orthologue of human peroxisomal proliferator-activated receptor A interacting complex 285 PRIC285 OS=Mus musculus GN=BC006779 PE=4 SV=1;>tr|E9QAM5|E9QAM5_MOUSE Protein BC006779 OS=Mus musculus GN=BC006779 PE=	5	37	37	37	22	20	24	15	8	9	27	24	24	12	14	12	22	20	24	15	8	9	27	24	24	12	14	12	22	20	24	15	8	9	27	24	24	12	14	12	16.8	16.8	16.8	334	2970
A2AS37;Q8BWN9	A2AS37;Q8BWN9		AI182371	>tr|A2AS37|A2AS37_MOUSE Novel anaphylotoxin-like domain containing protein OS=Mus musculus GN=AI182371 PE=4 SV=1;>tr|Q8BWN9|Q8BWN9_MOUSE Expressed sequence AI182371 OS=Mus musculus GN=AI182371 PE=2 SV=1	2	1	1	1	1	1	1	0	1	0	0	1	0	0	0	0	1	1	1	0	1	0	0	1	0	0	0	0	1	1	1	0	1	0	0	1	0	0	0	0	3.6	3.6	3.6	41.55	366
A2AS53;Q8K2I9;A2AS54;Q8K2I9-2;A2AS52	A2AS53;Q8K2I9;A2AS54;Q8K2I9-2	F-box only protein 18	Fbxo18	>tr|A2AS53|A2AS53_MOUSE F-box protein 18 OS=Mus musculus GN=Fbxo18 PE=4 SV=1;>sp|Q8K2I9|FBX18_MOUSE F-box only protein 18 OS=Mus musculus GN=Fbxo18 PE=2 SV=1;>tr|A2AS54|A2AS54_MOUSE F-box only protein 18 OS=Mus musculus GN=Fbxo18 PE=4 SV=1;>sp|Q8K2I9-2|FBX	5	3	3	3	3	2	3	1	2	1	3	2	2	1	2	2	3	2	3	1	2	1	3	2	2	1	2	2	3	2	3	1	2	1	3	2	2	1	2	2	2.8	2.8	2.8	118.3	1042
A2AS71;Q61712;F6ZL86	A2AS71;Q61712;F6ZL86	DnaJ homolog subfamily C member 1	Dnajc1	>tr|A2AS71|A2AS71_MOUSE DnaJ (Hsp40) homolog, subfamily C, member 1 OS=Mus musculus GN=Dnajc1 PE=4 SV=1;>sp|Q61712|DNJC1_MOUSE DnaJ homolog subfamily C member 1 OS=Mus musculus GN=Dnajc1 PE=1 SV=1;>tr|F6ZL86|F6ZL86_MOUSE DnaJ homolog subfamily C member 1 (	3	6	6	6	1	1	6	1	0	0	3	2	2	2	2	2	1	1	6	1	0	0	3	2	2	2	2	2	1	1	6	1	0	0	3	2	2	2	2	2	13.4	13.4	13.4	63.869	552
A2AS84;P28843	A2AS84;P28843	Dipeptidyl peptidase 4;Dipeptidyl peptidase 4 membrane form;Dipeptidyl peptidase 4 soluble form	Dpp4	>tr|A2AS84|A2AS84_MOUSE Dipeptidylpeptidase 4 OS=Mus musculus GN=Dpp4 PE=4 SV=1;>sp|P28843|DPP4_MOUSE Dipeptidyl peptidase 4 OS=Mus musculus GN=Dpp4 PE=1 SV=3	2	35	35	35	26	27	27	30	24	29	27	28	26	33	34	34	26	27	27	30	24	29	27	28	26	33	34	34	26	27	27	30	24	29	27	28	26	33	34	34	45.5	45.5	45.5	87.436	760
A2AS89	A2AS89	Agmatinase, mitochondrial	Agmat	>sp|A2AS89|SPEB_MOUSE Agmatinase, mitochondrial OS=Mus musculus GN=Agmat PE=2 SV=1	1	7	7	7	5	5	7	4	4	3	5	5	5	5	6	6	5	5	7	4	4	3	5	5	5	5	6	6	5	5	7	4	4	3	5	5	5	5	6	6	31.8	31.8	31.8	38.255	358
A2AS90;Q80TN4	A2AS90;Q80TN4	DnaJ homolog subfamily C member 16	Dnajc16	>tr|A2AS90|A2AS90_MOUSE DnaJ (Hsp40) homolog, subfamily C, member 16 OS=Mus musculus GN=Dnajc16 PE=4 SV=1;>sp|Q80TN4|DJC16_MOUSE DnaJ homolog subfamily C member 16 OS=Mus musculus GN=Dnajc16 PE=1 SV=2	2	5	5	5	1	1	4	0	1	0	4	3	5	0	1	0	1	1	4	0	1	0	4	3	5	0	1	0	1	1	4	0	1	0	4	3	5	0	1	0	7.1	7.1	7.1	89.135	772
A2AS95;P05208	A2AS95;P05208	Chymotrypsin-like elastase family member 2A	Cela2a	>tr|A2AS95|A2AS95_MOUSE Elastase 2A OS=Mus musculus GN=Cela2a PE=3 SV=1;>sp|P05208|CEL2A_MOUSE Chymotrypsin-like elastase family member 2A OS=Mus musculus GN=Cela2a PE=2 SV=1	2	6	6	6	2	4	4	3	3	3	5	4	4	6	6	3	2	4	4	3	3	3	5	4	4	6	6	3	2	4	4	3	3	3	5	4	4	6	6	3	40.2	40.2	40.2	28.913	271
A2AS98;A2AS97;P28660;E9QQ62;P28660-2	A2AS98;A2AS97;P28660;E9QQ62;P28660-2	Nck-associated protein 1	Nckap1	>tr|A2AS98|A2AS98_MOUSE NCK-associated protein 1 OS=Mus musculus GN=Nckap1 PE=4 SV=1;>tr|A2AS97|A2AS97_MOUSE NCK-associated protein 1 OS=Mus musculus GN=Nckap1 PE=4 SV=1;>sp|P28660|NCKP1_MOUSE Nck-associated protein 1 OS=Mus musculus GN=Nckap1 PE=1 SV=2;>t	5	48	48	48	33	33	36	28	26	29	38	36	41	34	34	35	33	33	36	28	26	29	38	36	41	34	34	35	33	33	36	28	26	29	38	36	41	34	34	35	47.5	47.5	47.5	129.51	1134
A2ASA8	A2ASA8	Inositol 1,4,5-trisphosphate receptor-interacting protein-like 1	Itpripl1	>sp|A2ASA8|IPIL1_MOUSE Inositol 1,4,5-trisphosphate receptor-interacting protein-like 1 OS=Mus musculus GN=Itpripl1 PE=2 SV=2	1	1	1	1	0	0	1	0	0	0	0	0	1	0	0	0	0	0	1	0	0	0	0	0	1	0	0	0	0	0	1	0	0	0	0	0	1	0	0	0	2.7	2.7	2.7	62.216	547
A2ASB2;Q9CY64;A2ASB1;A2ASB7;A2ASB8	A2ASB2;Q9CY64	Biliverdin reductase A	Blvra	>tr|A2ASB2|A2ASB2_MOUSE Biliverdin reductase A OS=Mus musculus GN=Blvra PE=4 SV=1;>sp|Q9CY64|BIEA_MOUSE Biliverdin reductase A OS=Mus musculus GN=Blvra PE=2 SV=1	5	13	13	13	11	8	11	6	7	5	8	9	12	6	3	5	11	8	11	6	7	5	8	9	12	6	3	5	11	8	11	6	7	5	8	9	12	6	3	5	47.1	47.1	47.1	33.524	295
A2ASB6;Q8C156	A2ASB6;Q8C156	Condensin complex subunit 2	Ncaph	>tr|A2ASB6|A2ASB6_MOUSE Condensin complex subunit 2 OS=Mus musculus GN=Ncaph PE=3 SV=1;>sp|Q8C156|CND2_MOUSE Condensin complex subunit 2 OS=Mus musculus GN=Ncaph PE=2 SV=1	2	7	7	7	4	4	3	0	2	1	5	5	4	1	2	2	4	4	3	0	2	1	5	5	4	1	2	2	4	4	3	0	2	1	5	5	4	1	2	2	14.4	14.4	14.4	82.302	731
A2ASC7;Q8C570;Q8CBU3;A2ASC6	A2ASC7;Q8C570;Q8CBU3;A2ASC6	mRNA export factor	Rae1	>tr|A2ASC7|A2ASC7_MOUSE RAE1 RNA export 1 homolog (S. pombe) OS=Mus musculus GN=Rae1 PE=4 SV=1;>sp|Q8C570|RAE1L_MOUSE mRNA export factor OS=Mus musculus GN=Rae1 PE=1 SV=1;>tr|Q8CBU3|Q8CBU3_MOUSE Uncharacterized protein OS=Mus musculus GN=Rae1 PE=2 SV=1;>tr	4	9	9	9	5	6	9	1	2	3	6	7	5	4	5	4	5	6	9	1	2	3	6	7	5	4	5	4	5	6	9	1	2	3	6	7	5	4	5	4	40.2	40.2	40.2	40.965	368
A2ASM3;O35972	A2ASM3;O35972	39S ribosomal protein L23, mitochondrial	OTTMUSG00000013301;Mrpl23	>tr|A2ASM3|A2ASM3_MOUSE MCG128338 OS=Mus musculus GN=Mrpl23 PE=4 SV=1;>sp|O35972|RM23_MOUSE 39S ribosomal protein L23, mitochondrial OS=Mus musculus GN=Mrpl23 PE=2 SV=1	2	7	7	7	5	4	5	6	4	3	6	6	6	5	4	7	5	4	5	6	4	3	6	6	6	5	4	7	5	4	5	6	4	3	6	6	6	5	4	7	63.7	63.7	63.7	17.121	146
A2ASQ1;A2ASQ1-2;A2ASQ1-3	A2ASQ1;A2ASQ1-2;A2ASQ1-3	Agrin	Agrn	>sp|A2ASQ1|AGRIN_MOUSE Agrin OS=Mus musculus GN=Agrn PE=1 SV=1;>sp|A2ASQ1-2|AGRIN_MOUSE Isoform 2 of Agrin OS=Mus musculus GN=Agrn;>sp|A2ASQ1-3|AGRIN_MOUSE Isoform 3 of Agrin OS=Mus musculus GN=Agrn	3	30	30	20	14	12	23	5	4	3	21	11	21	10	13	12	14	12	23	5	4	3	21	11	21	10	13	12	12	10	15	3	2	2	15	9	15	9	11	10	24.1	24.1	16.4	207.54	1950
A2ASS6;E9Q8K5;E9Q8N1;A2ASS6-2;E9Q8M7;F6ZVZ7;F7CR78;A2ASS6-3	A2ASS6;E9Q8K5;E9Q8N1;A2ASS6-2;E9Q8M7;F6ZVZ7	Titin	Ttn	>sp|A2ASS6|TITIN_MOUSE Titin OS=Mus musculus GN=Ttn PE=1 SV=1;>tr|E9Q8K5|E9Q8K5_MOUSE Titin OS=Mus musculus GN=Ttn PE=4 SV=1;>tr|E9Q8N1|E9Q8N1_MOUSE Titin OS=Mus musculus GN=Ttn PE=4 SV=1;>sp|A2ASS6-2|TITIN_MOUSE Isoform 2 of Titin OS=Mus musculus GN=Ttn;>	8	12	12	12	7	6	6	7	7	6	7	7	7	7	8	9	7	6	6	7	7	6	7	7	7	7	8	9	7	6	6	7	7	6	7	7	7	7	8	9	0.4	0.4	0.4	3906.4	35213
A2ASY1;Q5HZG4;A2ASY0;Q5HZG4-2	A2ASY1;Q5HZG4;A2ASY0	Transcription initiation factor TFIID subunit 3	Taf3	>tr|A2ASY1|A2ASY1_MOUSE TAF3 RNA polymerase II, TATA box binding protein (TBP)-associated factor OS=Mus musculus GN=Taf3 PE=2 SV=1;>sp|Q5HZG4|TAF3_MOUSE Transcription initiation factor TFIID subunit 3 OS=Mus musculus GN=Taf3 PE=1 SV=2;>tr|A2ASY0|A2ASY0_MOU	4	3	3	3	1	1	0	0	0	0	2	2	2	0	1	1	1	1	0	0	0	0	2	2	2	0	1	1	1	1	0	0	0	0	2	2	2	0	1	1	4.4	4.4	4.4	105.11	932
A2ASZ0;Q78T81	A2ASZ0;Q78T81	Protein FAM102A	Fam102a	>tr|A2ASZ0|A2ASZ0_MOUSE Novel protein OS=Mus musculus GN=Fam102a PE=4 SV=1;>sp|Q78T81|F102A_MOUSE Protein FAM102A OS=Mus musculus GN=Fam102a PE=1 SV=1	2	2	2	2	1	0	2	0	0	0	1	1	1	0	0	0	1	0	2	0	0	0	1	1	1	0	0	0	1	0	2	0	0	0	1	1	1	0	0	0	6.1	6.1	6.1	42.83	392
A2ASZ8-3;A2ASZ8-2;A2ASZ8-5;A2ASZ8-4;F6X0P2	A2ASZ8-3;A2ASZ8-2;A2ASZ8-5;A2ASZ8-4			>sp|A2ASZ8-3|SCMC2_MOUSE Isoform 3 of Calcium-binding mitochondrial carrier protein SCaMC-2 OS=Mus musculus GN=Slc25a25;>sp|A2ASZ8-2|SCMC2_MOUSE Isoform 2 of Calcium-binding mitochondrial carrier protein SCaMC-2 OS=Mus musculus GN=Slc25a25;>sp|A2ASZ8-5|SCM	5	5	5	1	2	1	2	2	2	2	2	2	2	4	5	5	2	1	2	2	2	2	2	2	2	4	5	5	1	0	1	0	0	0	1	1	1	1	1	1	11.7	11.7	2.7	56.772	514
A2AT05;P26883;F6X9I3;Q3UKJ3;Q1JUQ6;Q1JUQ8;A9E3L2;Q9Z2I2	A2AT05;P26883	Peptidyl-prolyl cis-trans isomerase;Peptidyl-prolyl cis-trans isomerase FKBP1A	Fkbp1a	>tr|A2AT05|A2AT05_MOUSE Peptidyl-prolyl cis-trans isomerase OS=Mus musculus GN=Fkbp1a PE=4 SV=1;>sp|P26883|FKB1A_MOUSE Peptidyl-prolyl cis-trans isomerase FKBP1A OS=Mus musculus GN=Fkbp1a PE=1 SV=2	8	6	6	6	4	5	5	1	0	0	5	5	3	4	1	2	4	5	5	1	0	0	5	5	3	4	1	2	4	5	5	1	0	0	5	5	3	4	1	2	63	63	63	11.922	108
A2AT31;O88441	A2AT31;O88441	Metaxin-2	Mtx2	>tr|A2AT31|A2AT31_MOUSE Metaxin 2 OS=Mus musculus GN=Mtx2 PE=4 SV=1;>sp|O88441|MTX2_MOUSE Metaxin-2 OS=Mus musculus GN=Mtx2 PE=1 SV=1	2	11	11	11	5	4	5	6	4	5	6	7	7	6	7	6	5	4	5	6	4	5	6	7	7	6	7	6	5	4	5	6	4	5	6	7	7	6	7	6	51.7	51.7	51.7	29.758	263
A2AT37;F6Q3G7	A2AT37		Upf2	>tr|A2AT37|A2AT37_MOUSE Protein Upf2 OS=Mus musculus GN=Upf2 PE=2 SV=1	2	12	12	12	7	4	8	1	3	1	9	11	10	3	2	3	7	4	8	1	3	1	9	11	10	3	2	3	7	4	8	1	3	1	9	11	10	3	2	3	10.6	10.6	10.6	147.55	1269
A2AT42;Q3U186;A2AT41	A2AT42;Q3U186	Probable arginine--tRNA ligase, mitochondrial	Rars2	>tr|A2AT42|A2AT42_MOUSE Arginyl-tRNA synthetase 2, mitochondrial (Putative) OS=Mus musculus GN=Rars2 PE=3 SV=1;>sp|Q3U186|SYRM_MOUSE Probable arginine--tRNA ligase, mitochondrial OS=Mus musculus GN=Rars2 PE=2 SV=1	3	16	16	16	8	6	9	7	9	8	9	10	11	7	10	7	8	6	9	7	9	8	9	10	11	7	10	7	8	6	9	7	9	8	9	10	11	7	10	7	33.9	33.9	33.9	65.335	578
A2AT49;Q9CQQ0	A2AT49;Q9CQQ0	UPF0708 protein C6orf162 homolog	1810030N24Rik	>tr|A2AT49|A2AT49_MOUSE Novel protein (1810030N24Rik) OS=Mus musculus GN=1810030N24Rik PE=4 SV=1;>sp|Q9CQQ0|CF162_MOUSE UPF0708 protein C6orf162 homolog OS=Mus musculus PE=2 SV=1	2	3	3	3	0	1	1	2	2	2	1	1	2	2	2	1	0	1	1	2	2	2	1	1	2	2	2	1	0	1	1	2	2	2	1	1	2	2	2	1	29.9	29.9	29.9	11.064	97
A2AT91	A2AT91		Plcb4	>tr|A2AT91|A2AT91_MOUSE Phospholipase C, beta 4 (Fragment) OS=Mus musculus GN=Plcb4 PE=4 SV=1	1	1	1	1	1	1	1	0	0	0	1	1	1	0	0	0	1	1	1	0	0	0	1	1	1	0	0	0	1	1	1	0	0	0	1	1	1	0	0	0	1.2	1.2	1.2	100.65	883
A2ATB9;Q8K1I7	A2ATB9;Q8K1I7	WAS/WASL-interacting protein family member 1	Wipf1	>tr|A2ATB9|A2ATB9_MOUSE WAS/WASL interacting protein family, member 1 OS=Mus musculus GN=Wipf1 PE=4 SV=1;>sp|Q8K1I7|WIPF1_MOUSE WAS/WASL-interacting protein family member 1 OS=Mus musculus GN=Wipf1 PE=1 SV=1	2	6	6	6	5	4	4	2	2	2	1	4	4	1	1	2	5	4	4	2	2	2	1	4	4	1	1	2	5	4	4	2	2	2	1	4	4	1	1	2	22.3	22.3	22.3	50.08	493
A2ATI0;Q8BXR9;A2ATH9;Q8BXR9-2;F8WIZ7	A2ATI0;Q8BXR9;A2ATH9;Q8BXR9-2;F8WIZ7	Oxysterol-binding protein;Oxysterol-binding protein-related protein 6	Osbpl6	>tr|A2ATI0|A2ATI0_MOUSE Oxysterol-binding protein OS=Mus musculus GN=Osbpl6 PE=3 SV=1;>sp|Q8BXR9|OSBL6_MOUSE Oxysterol-binding protein-related protein 6 OS=Mus musculus GN=Osbpl6 PE=2 SV=1;>tr|A2ATH9|A2ATH9_MOUSE Oxysterol-binding protein OS=Mus musculus G	5	15	15	15	4	6	7	1	1	2	11	10	11	3	6	4	4	6	7	1	1	2	11	10	11	3	6	4	4	6	7	1	1	2	11	10	11	3	6	4	22.3	22.3	22.3	108.92	959
A2ATI5;Q9WTX2	A2ATI5;Q9WTX2	Interferon-inducible double stranded RNA-dependent protein kinase activator A	Prkra	>tr|A2ATI5|A2ATI5_MOUSE Protein kinase, interferon inducible double stranded RNA dependent activator OS=Mus musculus GN=Prkra PE=4 SV=1;>sp|Q9WTX2|PRKRA_MOUSE Interferon-inducible double stranded RNA-dependent protein kinase activator A OS=Mus musculus GN=	2	6	6	6	3	3	5	3	2	2	4	4	4	1	1	1	3	3	5	3	2	2	4	4	4	1	1	1	3	3	5	3	2	2	4	4	4	1	1	1	39.9	39.9	39.9	34.371	313
A2ATI7;Q99JX3;A2ATI9;Q99JX3-2;A2ATI6;A2ATI8	A2ATI7;Q99JX3;A2ATI9;Q99JX3-2;A2ATI6;A2ATI8	Golgi reassembly-stacking protein 2	Gorasp2	>tr|A2ATI7|A2ATI7_MOUSE Golgi reassembly stacking protein 2 OS=Mus musculus GN=Gorasp2 PE=4 SV=1;>sp|Q99JX3|GORS2_MOUSE Golgi reassembly-stacking protein 2 OS=Mus musculus GN=Gorasp2 PE=1 SV=3;>tr|A2ATI9|A2ATI9_MOUSE Golgi reassembly stacking protein 2 OS=	6	6	6	6	5	6	5	3	4	4	4	5	4	4	5	5	5	6	5	3	4	4	4	5	4	4	5	5	5	6	5	3	4	4	4	5	4	4	5	5	22.4	22.4	22.4	47.038	451
A2ATK1;Q9DBR1;Q9DBR1-2	A2ATK1;Q9DBR1;Q9DBR1-2	5-3 exoribonuclease 2	Xrn2	>tr|A2ATK1|A2ATK1_MOUSE 5-3 exoribonuclease 2 OS=Mus musculus GN=Xrn2 PE=4 SV=1;>sp|Q9DBR1|XRN2_MOUSE 5-3 exoribonuclease 2 OS=Mus musculus GN=Xrn2 PE=1 SV=1;>sp|Q9DBR1-2|XRN2_MOUSE Isoform 2 of 5-3 exoribonuclease 2 OS=Mus musculus GN=Xrn2	3	24	24	24	20	17	18	4	2	3	17	19	20	8	8	8	20	17	18	4	2	3	17	19	20	8	8	8	20	17	18	4	2	3	17	19	20	8	8	8	30	30	30	108.69	951
A2ATP2;Q9ES70;A2ATN9;A2ATP1	A2ATP2;Q9ES70;A2ATN9	Serine/threonine-protein kinase Nek6	Nek6	>tr|A2ATP2|A2ATP2_MOUSE NIMA (Never in mitosis gene a)-related expressed OS=Mus musculus GN=Nek6 PE=4 SV=1;>sp|Q9ES70|NEK6_MOUSE Serine/threonine-protein kinase Nek6 OS=Mus musculus GN=Nek6 PE=1 SV=1;>tr|A2ATN9|A2ATN9_MOUSE NIMA (Never in mitosis gene a)-r	4	3	3	2	1	1	2	1	1	0	1	2	1	0	2	1	1	1	2	1	1	0	1	2	1	0	2	1	1	1	2	1	1	0	1	1	1	0	2	1	11.2	11.2	8.6	35.742	313
A2ATS2;P62073	A2ATS2;P62073	Mitochondrial import inner membrane translocase subunit Tim10	Timm10	>tr|A2ATS2|A2ATS2_MOUSE Translocase of inner mitochondrial membrane 10 homolog (Yeast) OS=Mus musculus GN=Timm10 PE=4 SV=1;>sp|P62073|TIM10_MOUSE Mitochondrial import inner membrane translocase subunit Tim10 OS=Mus musculus GN=Timm10 PE=1 SV=1	2	5	5	5	4	5	5	4	3	4	5	4	5	3	4	4	4	5	5	4	3	4	5	4	5	3	4	4	4	5	5	4	3	4	5	4	5	3	4	4	75.6	75.6	75.6	10.333	90
A2ATS6;Q7M6Z0	A2ATS6;Q7M6Z0	Reticulon-4 receptor-like 2	Rtn4rl2	>tr|A2ATS6|A2ATS6_MOUSE Reticulon 4 receptor-like 2 (Fragment) OS=Mus musculus GN=Rtn4rl2 PE=4 SV=1;>sp|Q7M6Z0|R4RL2_MOUSE Reticulon-4 receptor-like 2 OS=Mus musculus GN=Rtn4rl2 PE=2 SV=1	2	3	3	3	1	1	0	2	3	2	0	0	2	1	2	2	1	1	0	2	3	2	0	0	2	1	2	2	1	1	0	2	3	2	0	0	2	1	2	2	9.4	9.4	9.4	46.843	426
A2ATT3;Q8CII2;Q8CII2-2	A2ATT3;Q8CII2	Cell division cycle protein 123 homolog	Cdc123	>tr|A2ATT3|A2ATT3_MOUSE Cell division cycle 123 homolog (S. cerevisiae) OS=Mus musculus GN=Cdc123 PE=4 SV=1;>sp|Q8CII2|CD123_MOUSE Cell division cycle protein 123 homolog OS=Mus musculus GN=Cdc123 PE=2 SV=2	3	7	7	7	3	4	5	1	0	0	4	4	5	1	0	0	3	4	5	1	0	0	4	4	5	1	0	0	3	4	5	1	0	0	4	4	5	1	0	0	27.1	27.1	27.1	38.816	336
A2ATT8;Q9JLR1;Q9CYJ6	A2ATT8;Q9JLR1;Q9CYJ6	Protein transport protein Sec61 subunit alpha isoform 2	Sec61a2	>tr|A2ATT8|A2ATT8_MOUSE Sec61, alpha subunit 2 (S. cerevisiae) OS=Mus musculus GN=Sec61a2 PE=3 SV=1;>sp|Q9JLR1|S61A2_MOUSE Protein transport protein Sec61 subunit alpha isoform 2 OS=Mus musculus GN=Sec61a2 PE=2 SV=3;>tr|Q9CYJ6|Q9CYJ6_MOUSE Protein transpor	3	8	2	2	7	7	6	6	5	6	6	7	7	7	7	6	2	2	1	0	0	0	2	2	2	1	1	0	2	2	1	0	0	0	2	2	2	1	1	0	18.5	4.4	4.4	52.247	476
A2ATU9;Q8BY71	A2ATU9;Q8BY71	Histone acetyltransferase type B catalytic subunit	Hat1	>tr|A2ATU9|A2ATU9_MOUSE Histone acetyltransferase type B catalytic subunit OS=Mus musculus GN=Hat1 PE=4 SV=1;>sp|Q8BY71|HAT1_MOUSE Histone acetyltransferase type B catalytic subunit OS=Mus musculus GN=Hat1 PE=2 SV=1	2	2	2	2	2	1	2	1	1	1	1	1	1	2	1	2	2	1	2	1	1	1	1	1	1	2	1	2	2	1	2	1	1	1	1	1	1	2	1	2	6.9	6.9	6.9	50.182	423
A2AU19;Q8BXL7;E9PZK7	A2AU19;Q8BXL7;E9PZK7	ADP-ribosylation factor-related protein 1	Arfrp1	>tr|A2AU19|A2AU19_MOUSE ADP-ribosylation factor related protein 1 OS=Mus musculus GN=Arfrp1 PE=4 SV=1;>sp|Q8BXL7|ARFRP_MOUSE ADP-ribosylation factor-related protein 1 OS=Mus musculus GN=Arfrp1 PE=2 SV=2;>tr|E9PZK7|E9PZK7_MOUSE ADP-ribosylation factor-relat	3	9	9	9	5	2	4	4	5	6	5	4	4	5	7	7	5	2	4	4	5	6	5	4	4	5	7	7	5	2	4	4	5	6	5	4	4	5	7	7	62.7	62.7	62.7	22.659	201
A2AU25;Q9EQR5;F6QX71;F6ZRC5;A2AU24	A2AU25;Q9EQR5;F6QX71;F6ZRC5;A2AU24	Lck-interacting transmembrane adapter 1	Lime1	>tr|A2AU25|A2AU25_MOUSE Lck interacting transmembrane adaptor 1 OS=Mus musculus GN=Lime1 PE=4 SV=1;>sp|Q9EQR5|LIME1_MOUSE Lck-interacting transmembrane adapter 1 OS=Mus musculus GN=Lime1 PE=1 SV=1;>tr|F6QX71|F6QX71_MOUSE Lck-interacting transmembrane adapt	5	2	2	2	1	1	1	1	0	2	1	0	0	0	0	0	1	1	1	1	0	2	1	0	0	0	0	0	1	1	1	1	0	2	1	0	0	0	0	0	10.8	10.8	10.8	29.551	269
A2AU35;Q8BHL8	A2AU35;Q8BHL8	Proteasome inhibitor PI31 subunit	Psmf1	>tr|A2AU35|A2AU35_MOUSE Proteasome (Prosome, macropain) inhibitor subunit 1 OS=Mus musculus GN=Psmf1 PE=2 SV=1;>sp|Q8BHL8|PSMF1_MOUSE Proteasome inhibitor PI31 subunit OS=Mus musculus GN=Psmf1 PE=1 SV=1	2	6	6	6	3	3	4	3	2	1	3	4	4	3	4	3	3	3	4	3	2	1	3	4	4	3	4	3	3	3	4	3	2	1	3	4	4	3	4	3	33.2	33.2	33.2	29.664	271
A2AU91;P70399;A2AU89;E9QL34;P70399-3;P70399-2;A2AU90;F6QNC8;F6ZRL3	A2AU91;P70399;A2AU89;E9QL34;P70399-3;P70399-2	Tumor suppressor p53-binding protein 1	Trp53bp1;Tp53bp1	>tr|A2AU91|A2AU91_MOUSE Protein Trp53bp1 OS=Mus musculus GN=Trp53bp1 PE=4 SV=1;>sp|P70399|TP53B_MOUSE Tumor suppressor p53-binding protein 1 OS=Mus musculus GN=Tp53bp1 PE=1 SV=2;>tr|A2AU89|A2AU89_MOUSE Protein Trp53bp1 OS=Mus musculus GN=Trp53bp1 PE=4 SV=2	9	9	9	9	5	5	7	0	0	1	4	6	5	0	0	0	5	5	7	0	0	1	4	6	5	0	0	0	5	5	7	0	0	1	4	6	5	0	0	0	7.9	7.9	7.9	212.73	1969
A2AUE2;P60904;G5E8T0;A2AUE1	A2AUE2;P60904;G5E8T0;A2AUE1	DnaJ homolog subfamily C member 5	Dnajc5	>tr|A2AUE2|A2AUE2_MOUSE DnaJ (Hsp40) homolog, subfamily C, member 5 OS=Mus musculus GN=Dnajc5 PE=4 SV=1;>sp|P60904|DNJC5_MOUSE DnaJ homolog subfamily C member 5 OS=Mus musculus GN=Dnajc5 PE=1 SV=1;>tr|G5E8T0|G5E8T0_MOUSE DnaJ (Hsp40) homolog, subfamily C,	4	5	5	5	2	2	2	5	4	5	2	3	3	3	3	4	2	2	2	5	4	5	2	3	3	3	3	4	2	2	2	5	4	5	2	3	3	3	3	4	53.5	53.5	53.5	22.101	198
A2AUF6;P20029	A2AUF6;P20029	78 kDa glucose-regulated protein	Hspa5	>tr|A2AUF6|A2AUF6_MOUSE Heat shock 70kD protein 5 (Glucose-regulated protein) OS=Mus musculus GN=Hspa5 PE=3 SV=1;>sp|P20029|GRP78_MOUSE 78 kDa glucose-regulated protein OS=Mus musculus GN=Hspa5 PE=1 SV=3	2	43	43	41	40	40	41	34	35	37	40	39	41	40	41	40	40	40	41	34	35	37	40	39	41	40	41	40	38	38	39	32	33	35	38	37	39	38	39	38	62	62	62	72.421	655
A2AUL3;Q80ZI6	A2AUL3;Q80ZI6	E3 ubiquitin-protein ligase LRSAM1	Lrsam1	>tr|A2AUL3|A2AUL3_MOUSE Leucine rich repeat and sterile alpha motif containing 1 OS=Mus musculus GN=Lrsam1 PE=4 SV=1;>sp|Q80ZI6|LRSM1_MOUSE E3 ubiquitin-protein ligase LRSAM1 OS=Mus musculus GN=Lrsam1 PE=2 SV=1	2	1	1	1	1	1	1	0	0	1	1	1	1	1	0	1	1	1	1	0	0	1	1	1	1	1	0	1	1	1	1	0	0	1	1	1	1	1	0	1	1.9	1.9	1.9	83.976	727
A2AUM5;P16254	A2AUM5;P16254	Signal recognition particle 14 kDa protein	Srp14	>tr|A2AUM5|A2AUM5_MOUSE MCG142467 OS=Mus musculus GN=Srp14 PE=4 SV=1;>sp|P16254|SRP14_MOUSE Signal recognition particle 14 kDa protein OS=Mus musculus GN=Srp14 PE=1 SV=1	2	6	6	2	3	3	3	4	2	1	3	3	3	1	3	3	3	3	3	4	2	1	3	3	3	1	3	3	1	1	1	2	0	0	1	0	0	1	0	0	69.1	69.1	22.7	12.51	110
A2AUY9;Q8VC88	A2AUY9;Q8VC88	Grancalcin	Gca	>tr|A2AUY9|A2AUY9_MOUSE Grancalcin OS=Mus musculus GN=Gca PE=4 SV=1;>sp|Q8VC88|GRAN_MOUSE Grancalcin OS=Mus musculus GN=Gca PE=2 SV=1	2	2	2	2	2	2	2	1	0	1	2	1	2	1	1	2	2	2	2	1	0	1	2	1	2	1	1	2	2	2	2	1	0	1	2	1	2	1	1	2	8.2	8.2	8.2	24.663	220
A2AV56;Q7TT52;Q7TT52-2	A2AV56;Q7TT52;Q7TT52-2	Protein phosphatase 1 regulatory subunit 14D	Ppp1r14d	>tr|A2AV56|A2AV56_MOUSE Protein phosphatase 1, regulatory (Inhibitor) subunit 14D OS=Mus musculus GN=Ppp1r14d PE=4 SV=1;>sp|Q7TT52|PP14D_MOUSE Protein phosphatase 1 regulatory subunit 14D OS=Mus musculus GN=Ppp1r14d PE=2 SV=2;>sp|Q7TT52-2|PP14D_MOUSE Isofo	3	5	5	5	3	4	4	0	0	1	2	2	3	1	0	0	3	4	4	0	0	1	2	2	3	1	0	0	3	4	4	0	0	1	2	2	3	1	0	0	37.7	37.7	37.7	16.817	146
A2AV60;Q8R307;E9PWR0;E9Q0R7	A2AV60;Q8R307;E9PWR0;E9Q0R7	Vacuolar protein sorting-associated protein 18 homolog	Vps18	>tr|A2AV60|A2AV60_MOUSE Vacuolar protein sorting 18 (Yeast) OS=Mus musculus GN=Vps18 PE=4 SV=1;>sp|Q8R307|VPS18_MOUSE Vacuolar protein sorting-associated protein 18 homolog OS=Mus musculus GN=Vps18 PE=1 SV=2;>tr|E9PWR0|E9PWR0_MOUSE Vacuolar protein sorting	4	12	12	12	3	3	7	10	7	8	6	8	6	8	9	9	3	3	7	10	7	8	6	8	6	8	9	9	3	3	7	10	7	8	6	8	6	8	9	9	15.4	15.4	15.4	110.22	973
A2AV97;P10639	A2AV97;P10639	Thioredoxin	Txn1;Txn	>tr|A2AV97|A2AV97_MOUSE Thioredoxin OS=Mus musculus GN=Txn1 PE=3 SV=1;>sp|P10639|THIO_MOUSE Thioredoxin OS=Mus musculus GN=Txn PE=1 SV=3	2	7	7	7	5	6	5	4	5	4	5	5	4	4	4	6	5	6	5	4	5	4	5	5	4	4	4	6	5	6	5	4	5	4	5	5	4	4	4	6	76.2	76.2	76.2	11.675	105
A2AVJ6;Q8K2Q0	A2AVJ6;Q8K2Q0	COMM domain-containing protein 9	Commd9	>tr|A2AVJ6|A2AVJ6_MOUSE COMM domain containing 9 OS=Mus musculus GN=Commd9 PE=4 SV=1;>sp|Q8K2Q0|COMD9_MOUSE COMM domain-containing protein 9 OS=Mus musculus GN=Commd9 PE=2 SV=3	2	3	3	3	2	2	2	1	0	1	2	2	0	1	0	0	2	2	2	1	0	1	2	2	0	1	0	0	2	2	2	1	0	1	2	2	0	1	0	0	23.7	23.7	23.7	21.85	198
A2AVM7;Q8CE96;Q8CE96-3;Q8CE96-4	A2AVM7;Q8CE96;Q8CE96-3	tRNA (adenine(58)-N(1))-methyltransferase non-catalytic subunit TRM6	Trmt6	>tr|A2AVM7|A2AVM7_MOUSE RIKEN cDNA 3300001M20, isoform CRA_b OS=Mus musculus GN=Trmt6 PE=4 SV=1;>sp|Q8CE96|TRM6_MOUSE tRNA (adenine(58)-N(1))-methyltransferase non-catalytic subunit TRM6 OS=Mus musculus GN=Trmt6 PE=1 SV=1;>sp|Q8CE96-3|TRM6_MOUSE Isoform 3	4	6	6	6	4	4	3	1	0	1	2	3	4	1	2	2	4	4	3	1	0	1	2	3	4	1	2	2	4	4	3	1	0	1	2	3	4	1	2	2	15.7	15.7	15.7	55.518	497
A2AVN0;Q80ZM8;E9PUH6;E9PUW6;E9PYF8	A2AVN0;Q80ZM8;E9PUH6;E9PUW6	Cardiolipin synthase	Crls1	>tr|A2AVN0|A2AVN0_MOUSE Cardiolipin synthase 1 OS=Mus musculus GN=Crls1 PE=4 SV=1;>sp|Q80ZM8|CRLS1_MOUSE Cardiolipin synthase OS=Mus musculus GN=Crls1 PE=2 SV=1;>tr|E9PUH6|E9PUH6_MOUSE Cardiolipin synthase (Fragment) OS=Mus musculus GN=Crls1 PE=4 SV=1;>tr|	5	3	3	3	2	1	2	2	2	1	2	1	2	3	3	3	2	1	2	2	2	1	2	1	2	3	3	3	2	1	2	2	2	1	2	1	2	3	3	3	12.2	12.2	12.2	32.502	303
A2AVP2;Q9DBX2;A2AVP3	A2AVP2;Q9DBX2;A2AVP3	Phosducin-like protein	Pdcl	>tr|A2AVP2|A2AVP2_MOUSE Phosducin-like OS=Mus musculus GN=Pdcl PE=4 SV=1;>sp|Q9DBX2|PHLP_MOUSE Phosducin-like protein OS=Mus musculus GN=Pdcl PE=1 SV=1;>tr|A2AVP3|A2AVP3_MOUSE Phosducin-like (Fragment) OS=Mus musculus GN=Pdcl PE=4 SV=1	3	5	5	5	3	3	5	0	0	0	2	2	2	0	0	0	3	3	5	0	0	0	2	2	2	0	0	0	3	3	5	0	0	0	2	2	2	0	0	0	25.6	25.6	25.6	34.406	301
A2AVQ6;Q8C159	A2AVQ6;Q8C159	Tetratricopeptide repeat protein 22	Ttc22	>tr|A2AVQ6|A2AVQ6_MOUSE Tetratricopeptide repeat domain 22 OS=Mus musculus GN=Ttc22 PE=2 SV=1;>sp|Q8C159|TTC22_MOUSE Tetratricopeptide repeat protein 22 OS=Mus musculus GN=Ttc22 PE=2 SV=1	2	1	1	1	1	0	1	0	0	0	1	1	0	0	0	0	1	0	1	0	0	0	1	1	0	0	0	0	1	0	1	0	0	0	1	1	0	0	0	0	3.2	3.2	3.2	63.1	568
A2AVR0;Q8R3H9;A2AVQ9;A2AVR1	A2AVR0;Q8R3H9;A2AVQ9;A2AVR1	Tetratricopeptide repeat protein 4	Ttc4	>tr|A2AVR0|A2AVR0_MOUSE Tetratricopeptide repeat domain 4 OS=Mus musculus GN=Ttc4 PE=4 SV=1;>sp|Q8R3H9|TTC4_MOUSE Tetratricopeptide repeat protein 4 OS=Mus musculus GN=Ttc4 PE=2 SV=1;>tr|A2AVQ9|A2AVQ9_MOUSE Tetratricopeptide repeat domain 4 OS=Mus musculus	4	5	5	5	2	3	2	1	2	0	3	3	2	1	0	1	2	3	2	1	2	0	3	3	2	1	0	1	2	3	2	1	2	0	3	3	2	1	0	1	16.3	16.3	16.3	44.338	386
A2AVR9;P62627	A2AVR9;P62627	Dynein light chain roadblock-type 1	Dynlrb1	>tr|A2AVR9|A2AVR9_MOUSE Dynein light chain roadblock-type 1 OS=Mus musculus GN=Dynlrb1 PE=4 SV=1;>sp|P62627|DLRB1_MOUSE Dynein light chain roadblock-type 1 OS=Mus musculus GN=Dynlrb1 PE=1 SV=3	2	6	6	6	4	6	5	2	1	2	6	6	4	3	3	4	4	6	5	2	1	2	6	6	4	3	3	4	4	6	5	2	1	2	6	6	4	3	3	4	74	74	74	11.928	104
A2AVS0;Q8C863;Q8C863-2	A2AVS0;Q8C863;Q8C863-2	E3 ubiquitin-protein ligase Itchy	Itch	>tr|A2AVS0|A2AVS0_MOUSE E3 ubiquitin-protein ligase OS=Mus musculus GN=Itch PE=4 SV=1;>sp|Q8C863|ITCH_MOUSE E3 ubiquitin-protein ligase Itchy OS=Mus musculus GN=Itch PE=1 SV=2;>sp|Q8C863-2|ITCH_MOUSE Isoform 2 of E3 ubiquitin-protein ligase Itchy OS=Mus mu	3	24	23	1	12	11	13	18	16	17	11	10	11	17	18	13	11	10	12	17	16	17	11	10	11	17	17	13	0	0	1	0	0	0	0	0	0	0	0	0	38	37	2	98.992	864
A2AVY6;Q9CQ19	A2AVY6;Q9CQ19	Myosin regulatory light polypeptide 9	Myl9	>tr|A2AVY6|A2AVY6_MOUSE MCG5232 OS=Mus musculus GN=Myl9 PE=4 SV=1;>sp|Q9CQ19|MYL9_MOUSE Myosin regulatory light polypeptide 9 OS=Mus musculus GN=Myl9 PE=1 SV=3	2	13	4	4	11	10	12	6	6	7	13	11	12	8	8	8	2	2	3	1	1	1	4	2	3	2	1	1	2	2	3	1	1	1	4	2	3	2	1	1	67.4	26.2	26.2	19.854	172
A2AVZ1;Q9CQT9	A2AVZ1;Q9CQT9	Uncharacterized protein C20orf24 homolog	1110008F13Rik	>tr|A2AVZ1|A2AVZ1_MOUSE Novel transcript OS=Mus musculus GN=1110008F13Rik PE=4 SV=1;>sp|Q9CQT9|CT024_MOUSE Uncharacterized protein C20orf24 homolog OS=Mus musculus PE=2 SV=1	2	3	3	3	2	1	1	1	1	1	2	1	3	1	1	1	2	1	1	1	1	1	2	1	3	1	1	1	2	1	1	1	1	1	2	1	3	1	1	1	21.7	21.7	21.7	14.825	129
A2AVZ9;A2AVZ9-2	A2AVZ9;A2AVZ9-2	Solute carrier family 43 member 3	Slc43a3	>sp|A2AVZ9|S43A3_MOUSE Solute carrier family 43 member 3 OS=Mus musculus GN=Slc43a3 PE=2 SV=1;>sp|A2AVZ9-2|S43A3_MOUSE Isoform 2 of Solute carrier family 43 member 3 OS=Mus musculus GN=Slc43a3	2	4	4	4	3	2	2	3	3	3	2	2	2	4	3	3	3	2	2	3	3	3	2	2	2	4	3	3	3	2	2	3	3	3	2	2	2	4	3	3	13.1	13.1	13.1	56.033	502
A2AW86;Q3TZE4	A2AW86		Ly75	>tr|A2AW86|A2AW86_MOUSE Lymphocyte antigen 75 OS=Mus musculus GN=Ly75 PE=4 SV=1	2	59	1	1	22	27	26	41	33	37	36	36	36	43	46	45	1	0	0	1	0	0	1	1	1	1	1	1	1	0	0	1	0	0	1	1	1	1	1	1	44.3	0.8	0.8	197.38	1723
A2AWA9;B2RRC5;A2AWA9-2;A2AWA7;A2AWA9-3;A2AWB0	A2AWA9;B2RRC5;A2AWA9-2	Rab GTPase-activating protein 1	Rabgap1	>sp|A2AWA9|RBGP1_MOUSE Rab GTPase-activating protein 1 OS=Mus musculus GN=Rabgap1 PE=2 SV=1;>tr|B2RRC5|B2RRC5_MOUSE RAB GTPase activating protein 1 OS=Mus musculus GN=Rabgap1 PE=2 SV=1;>sp|A2AWA9-2|RBGP1_MOUSE Isoform 2 of Rab GTPase-activating protein 1 O	6	13	13	11	6	6	10	1	3	2	5	9	9	3	3	3	6	6	10	1	3	2	5	9	9	3	3	3	4	4	8	1	2	1	3	7	7	3	2	2	16.2	16.2	13.9	120.8	1064
A2AWH6;Q8BKZ9;A2AWH8;A2AWH7	A2AWH6;Q8BKZ9	Pyruvate dehydrogenase protein X component, mitochondrial	Pdhx	>tr|A2AWH6|A2AWH6_MOUSE Pyruvate dehydrogenase complex, component X OS=Mus musculus GN=Pdhx PE=3 SV=1;>sp|Q8BKZ9|ODPX_MOUSE Pyruvate dehydrogenase protein X component, mitochondrial OS=Mus musculus GN=Pdhx PE=2 SV=1	4	17	17	17	11	11	12	10	10	11	9	7	11	13	14	13	11	11	12	10	10	11	9	7	11	13	14	13	11	11	12	10	10	11	9	7	11	13	14	13	48.7	48.7	48.7	53.998	501
A2AWI7;Q8R3V5;Q8R3V5-1;Q8R3V5-3;A2AWI9	A2AWI7;Q8R3V5;Q8R3V5-1;Q8R3V5-3;A2AWI9	Endophilin-B2	Sh3glb2	>tr|A2AWI7|A2AWI7_MOUSE Endophilin-B2 OS=Mus musculus GN=Sh3glb2 PE=4 SV=1;>sp|Q8R3V5|SHLB2_MOUSE Endophilin-B2 OS=Mus musculus GN=Sh3glb2 PE=2 SV=2;>sp|Q8R3V5-1|SHLB2_MOUSE Isoform 1 of Endophilin-B2 OS=Mus musculus GN=Sh3glb2;>sp|Q8R3V5-3|SHLB2_MOUSE Iso	5	4	4	4	1	2	3	1	0	1	4	3	3	3	2	3	1	2	3	1	0	1	4	3	3	3	2	3	1	2	3	1	0	1	4	3	3	3	2	3	19.3	19.3	19.3	44.907	404
A2AWJ4;Q9JMF7;A2AWJ3;F2Z4A4	A2AWJ4;Q9JMF7;A2AWJ3	Dolichyldiphosphatase 1	Dolpp1	>tr|A2AWJ4|A2AWJ4_MOUSE Dolichyl pyrophosphate phosphatase 1 OS=Mus musculus GN=Dolpp1 PE=4 SV=1;>sp|Q9JMF7|DOPP1_MOUSE Dolichyldiphosphatase 1 OS=Mus musculus GN=Dolpp1 PE=2 SV=1;>tr|A2AWJ3|A2AWJ3_MOUSE Dolichyl pyrophosphate phosphatase 1 OS=Mus musculus	4	6	6	6	5	4	3	5	4	3	3	3	4	6	6	6	5	4	3	5	4	3	3	3	4	6	6	6	5	4	3	5	4	3	3	3	4	6	6	6	21.8	21.8	21.8	27.098	238
A2AWN8;A2AWN9;P59326	A2AWN8;A2AWN9;P59326	YTH domain family protein 1	Ythdf1	>tr|A2AWN8|A2AWN8_MOUSE YTH domain family 1 OS=Mus musculus GN=Ythdf1 PE=4 SV=1;>tr|A2AWN9|A2AWN9_MOUSE YTH domain family 1 OS=Mus musculus GN=Ythdf1 PE=4 SV=1;>sp|P59326|YTHD1_MOUSE YTH domain family protein 1 OS=Mus musculus GN=Ythdf1 PE=2 SV=1	3	10	5	4	6	4	6	2	2	2	7	7	5	2	1	1	4	2	2	1	1	2	4	3	2	2	1	1	3	1	1	0	0	1	3	2	1	1	0	0	19.3	9.6	7.2	63.899	586
A2AWP8;A2AWP8-4;A2AWP8-2;A2AWP8-3;A2AWP6;A2AWP8-5;F6S3V7;A2AWP4	A2AWP8;A2AWP8-4;A2AWP8-2;A2AWP8-3;A2AWP6;A2AWP8-5	Rho guanine nucleotide exchange factor 10-like protein	Arhgef10l	>sp|A2AWP8|ARGAL_MOUSE Rho guanine nucleotide exchange factor 10-like protein OS=Mus musculus GN=Arhgef10l PE=1 SV=1;>sp|A2AWP8-4|ARGAL_MOUSE Isoform 4 of Rho guanine nucleotide exchange factor 10-like protein OS=Mus musculus GN=Arhgef10l;>sp|A2AWP8-2|ARGA	8	3	3	3	2	1	2	1	0	0	1	1	2	0	0	1	2	1	2	1	0	0	1	1	2	0	0	1	2	1	2	1	0	0	1	1	2	0	0	1	2.8	2.8	2.8	139.99	1280
A2AWQ5;Q8CI94;Q9WUB3;E9PUM3	A2AWQ5;Q8CI94	Phosphorylase;Glycogen phosphorylase, brain form	Pygb	>tr|A2AWQ5|A2AWQ5_MOUSE Phosphorylase OS=Mus musculus GN=Pygb PE=3 SV=1;>sp|Q8CI94|PYGB_MOUSE Glycogen phosphorylase, brain form OS=Mus musculus GN=Pygb PE=1 SV=3	4	22	22	21	13	18	19	5	7	9	20	19	18	14	13	12	13	18	19	5	7	9	20	19	18	14	13	12	13	17	18	5	7	9	20	19	17	14	13	11	36.1	36.1	34.6	96.729	843
A2AWQ8;Q9DA19;Q9DA19-3	A2AWQ8;Q9DA19;Q9DA19-3	Corepressor interacting with RBPJ 1	Cir1	>tr|A2AWQ8|A2AWQ8_MOUSE Novel protein, possible orthologue of human CBF1 interacting corepressor (CIR) (1700023B02Rik) OS=Mus musculus GN=Cir1 PE=4 SV=1;>sp|Q9DA19|CIR1_MOUSE Corepressor interacting with RBPJ 1 OS=Mus musculus GN=Cir1 PE=1 SV=2;>sp|Q9DA19-	3	2	2	2	1	0	0	0	0	1	0	0	0	0	0	0	1	0	0	0	0	1	0	0	0	0	0	0	1	0	0	0	0	1	0	0	0	0	0	0	5.8	5.8	5.8	51.837	450
A2AWR3;A2AWR2;E9Q8A2;Q14BN5;F6Z6G4	A2AWR3;A2AWR2;E9Q8A2;Q14BN5		Gpr155	>tr|A2AWR3|A2AWR3_MOUSE G protein-coupled receptor 155 OS=Mus musculus GN=Gpr155 PE=2 SV=1;>tr|A2AWR2|A2AWR2_MOUSE G protein-coupled receptor 155 OS=Mus musculus GN=Gpr155 PE=2 SV=1;>tr|E9Q8A2|E9Q8A2_MOUSE Protein Gpr155 OS=Mus musculus GN=Gpr155 PE=4 SV=1	5	16	16	16	7	7	4	12	11	11	5	8	7	14	11	13	7	7	4	12	11	11	5	8	7	14	11	13	7	7	4	12	11	11	5	8	7	14	11	13	22.2	22.2	22.2	96.346	868
A2AWT7;P25976;A2AWT5;P25976-2;A2AWT6;E9Q4A8;G3UZW9	A2AWT7;P25976;A2AWT5;P25976-2;A2AWT6	Nucleolar transcription factor 1	Ubtf	>tr|A2AWT7|A2AWT7_MOUSE Nucleolar transcription factor 1 OS=Mus musculus GN=Ubtf PE=4 SV=1;>sp|P25976|UBF1_MOUSE Nucleolar transcription factor 1 OS=Mus musculus GN=Ubtf PE=1 SV=1;>tr|A2AWT5|A2AWT5_MOUSE Nucleolar transcription factor 1 OS=Mus musculus GN=	7	21	21	21	9	9	13	4	4	5	15	13	13	6	4	4	9	9	13	4	4	5	15	13	13	6	4	4	9	9	13	4	4	5	15	13	13	6	4	4	31.8	31.8	31.8	88.386	752
A2AX52;E9Q9G0	A2AX52;E9Q9G0	Collagen alpha-4(VI) chain	Col6a4	>sp|A2AX52|CO6A4_MOUSE Collagen alpha-4(VI) chain OS=Mus musculus GN=Col6a4 PE=1 SV=2;>tr|E9Q9G0|E9Q9G0_MOUSE Collagen alpha-4(VI) chain OS=Mus musculus GN=Col6a4 PE=4 SV=1	2	36	36	36	14	17	19	9	9	10	27	25	33	15	14	14	14	17	19	9	9	10	27	25	33	15	14	14	14	17	19	9	9	10	27	25	33	15	14	14	20.7	20.7	20.7	250.8	2309
A2BDN9;Q8C5K5;Q8C5K5-2	A2BDN9;Q8C5K5	Uncharacterized protein CXorf38 homolog	1810030O07Rik	>tr|A2BDN9|A2BDN9_MOUSE Novel transcript OS=Mus musculus GN=1810030O07Rik PE=2 SV=1;>sp|Q8C5K5|CX038_MOUSE Uncharacterized protein CXorf38 homolog OS=Mus musculus PE=2 SV=1	3	4	4	4	1	1	2	0	0	0	3	3	2	1	1	1	1	1	2	0	0	0	3	3	2	1	1	1	1	1	2	0	0	0	3	3	2	1	1	1	15.3	15.3	15.3	36.588	320
A2BDV8;P70333	A2BDV8;P70333	Heterogeneous nuclear ribonucleoprotein H2	Hnrnph2	>tr|A2BDV8|A2BDV8_MOUSE Heterogeneous nuclear ribonucleoprotein H2 OS=Mus musculus GN=Hnrnph2 PE=4 SV=1;>sp|P70333|HNRH2_MOUSE Heterogeneous nuclear ribonucleoprotein H2 OS=Mus musculus GN=Hnrnph2 PE=1 SV=1	2	14	5	5	11	11	13	5	4	5	13	12	14	7	7	7	3	4	5	1	2	2	5	4	5	2	1	1	3	4	5	1	2	2	5	4	5	2	1	1	47.9	19.8	19.8	49.279	449
A2BDV9;P35991;A2BDW0	A2BDV9;P35991;A2BDW0	Tyrosine-protein kinase BTK	Btk	>tr|A2BDV9|A2BDV9_MOUSE Bruton agammaglobulinemia tyrosine kinase OS=Mus musculus GN=Btk PE=4 SV=1;>sp|P35991|BTK_MOUSE Tyrosine-protein kinase BTK OS=Mus musculus GN=Btk PE=1 SV=4;>tr|A2BDW0|A2BDW0_MOUSE Bruton agammaglobulinemia tyrosine kinase OS=Mus mu	3	3	3	3	1	2	3	0	1	1	2	3	3	0	1	0	1	2	3	0	1	1	2	3	3	0	1	0	1	2	3	0	1	1	2	3	3	0	1	0	5	5	5	76.437	659
A2BDX0;Q9Z103	A2BDX0;Q9Z103	Activity-dependent neuroprotector homeobox protein	Adnp	>tr|A2BDX0|A2BDX0_MOUSE Activity-dependent neuroprotective protein OS=Mus musculus GN=Adnp PE=3 SV=1;>sp|Q9Z103|ADNP_MOUSE Activity-dependent neuroprotector homeobox protein OS=Mus musculus GN=Adnp PE=2 SV=1	2	11	11	11	4	5	5	0	0	0	9	6	7	2	0	0	4	5	5	0	0	0	9	6	7	2	0	0	4	5	5	0	0	0	9	6	7	2	0	0	11.6	11.6	11.6	124.31	1108
A2BDX1;O70152;A2BDX2;F8WII3	A2BDX1;O70152;A2BDX2	Dolichol-phosphate mannosyltransferase	Dpm1	>tr|A2BDX1|A2BDX1_MOUSE Dolichol-phosphate (Beta-D) mannosyltransferase 1 OS=Mus musculus GN=Dpm1 PE=4 SV=1;>sp|O70152|DPM1_MOUSE Dolichol-phosphate mannosyltransferase OS=Mus musculus GN=Dpm1 PE=2 SV=1;>tr|A2BDX2|A2BDX2_MOUSE Dolichol-phosphate (Beta-D) m	4	15	15	15	13	9	13	11	8	8	12	12	12	10	12	12	13	9	13	11	8	8	12	12	12	10	12	12	13	9	13	11	8	8	12	12	12	10	12	12	62.3	62.3	62.3	29.174	260
A2BDX3	A2BDX3	Adenylyltransferase and sulfurtransferase MOCS3;Molybdopterin-synthase adenylyltransferase;Molybdopterin-synthase sulfurtransferase	Mocs3	>sp|A2BDX3|MOCS3_MOUSE Adenylyltransferase and sulfurtransferase MOCS3 OS=Mus musculus GN=Mocs3 PE=2 SV=1	1	15	15	15	9	10	12	7	6	8	10	11	13	11	11	10	9	10	12	7	6	8	10	11	13	11	11	10	9	10	12	7	6	8	10	11	13	11	11	10	44.6	44.6	44.6	49.374	460
A2BE28;A2BE28-2	A2BE28;A2BE28-2	Ribosomal biogenesis protein LAS1L	Las1l	>sp|A2BE28|LAS1L_MOUSE Ribosomal biogenesis protein LAS1L OS=Mus musculus GN=Las1l PE=2 SV=1;>sp|A2BE28-2|LAS1L_MOUSE Isoform 2 of Ribosomal biogenesis protein LAS1L OS=Mus musculus GN=Las1l	2	9	9	9	4	6	6	1	2	2	7	4	4	1	1	1	4	6	6	1	2	2	7	4	4	1	1	1	4	6	6	1	2	2	7	4	4	1	1	1	14.4	14.4	14.4	89.413	776
A2BE99;Q8VC90-2;A2BEA0;Q8VC90	A2BE99;Q8VC90-2;A2BEA0;Q8VC90	Probable palmitoyltransferase ZDHHC12	Zdhhc12	>tr|A2BE99|A2BE99_MOUSE Zinc finger DHHC domain containing 12 OS=Mus musculus GN=Zdhhc12 PE=4 SV=1;>sp|Q8VC90-2|ZDH12_MOUSE Isoform 2 of Probable palmitoyltransferase ZDHHC12 OS=Mus musculus GN=Zdhhc12;>tr|A2BEA0|A2BEA0_MOUSE Zinc finger DHHC domain contai	4	5	5	5	3	2	3	3	1	1	4	4	3	3	4	4	3	2	3	3	1	1	4	4	3	3	4	4	3	2	3	3	1	1	4	4	3	3	4	4	20.3	20.3	20.3	32.147	281
A2BEE8;Q9ESM6	A2BEE8;Q9ESM6	Glycerophosphoinositol inositolphosphodiesterase GDPD2	Gdpd2	>tr|A2BEE8|A2BEE8_MOUSE Glycerophosphodiester phosphodiesterase domain containing 2 OS=Mus musculus GN=Gdpd2 PE=4 SV=1;>sp|Q9ESM6|GDPD2_MOUSE Glycerophosphoinositol inositolphosphodiesterase GDPD2 OS=Mus musculus GN=Gdpd2 PE=1 SV=1	2	10	10	10	4	5	7	7	7	7	5	5	5	8	10	8	4	5	7	7	7	7	5	5	5	8	10	8	4	5	7	7	7	7	5	5	5	8	10	8	20	20	20	61.164	539
A2BEF2;A2BEF1;P70175;A2BEE9;Q52KF7	A2BEF2;A2BEF1;P70175;A2BEE9;Q52KF7	Disks large homolog 3	Dlg3	>tr|A2BEF2|A2BEF2_MOUSE Discs, large homolog 3 (Drosophila) OS=Mus musculus GN=Dlg3 PE=4 SV=1;>tr|A2BEF1|A2BEF1_MOUSE Discs, large homolog 3 (Drosophila) OS=Mus musculus GN=Dlg3 PE=4 SV=1;>sp|P70175|DLG3_MOUSE Disks large homolog 3 OS=Mus musculus GN=Dlg3	5	10	8	8	6	8	7	6	5	8	9	7	10	4	6	5	4	6	5	4	4	7	7	6	8	3	4	4	4	6	5	4	4	7	7	6	8	3	4	4	31.2	27.1	27.1	57.905	512
A2BFA6	A2BFA6		Naglu	>tr|A2BFA6|A2BFA6_MOUSE Alpha-N-acetylglucosaminidase (Sanfilippo disease IIIB) OS=Mus musculus GN=Naglu PE=4 SV=1	1	11	11	11	9	7	10	5	5	7	9	7	10	7	7	7	9	7	10	5	5	7	9	7	10	7	7	7	9	7	10	5	5	7	9	7	10	7	7	7	21.9	21.9	21.9	82.621	739
A2BFB0;O08609;A2BFB1;O08609-3;A2BFB2;O08609-2;A2BFA9	A2BFB0;O08609;A2BFB1;O08609-3;A2BFB2;O08609-2	Max-like protein X	Mlx	>tr|A2BFB0|A2BFB0_MOUSE MAX-like protein X OS=Mus musculus GN=Mlx PE=4 SV=1;>sp|O08609|MLX_MOUSE Max-like protein X OS=Mus musculus GN=Mlx PE=1 SV=1;>tr|A2BFB1|A2BFB1_MOUSE MAX-like protein X OS=Mus musculus GN=Mlx PE=4 SV=1;>sp|O08609-3|MLX_MOUSE Isoform	7	8	8	8	6	6	8	3	3	2	6	7	6	2	5	3	6	6	8	3	3	2	6	7	6	2	5	3	6	6	8	3	3	2	6	7	6	2	5	3	40.6	40.6	40.6	33.355	298
A2BFF7;O88487;A2BFF8;Q3TPJ8;A2BFF9;A2BFF5;D3Z0M6;O88485;Q3TYJ3;O88485-2;D3Z258	A2BFF7;O88487;A2BFF8;Q3TPJ8;A2BFF9;A2BFF5	Cytoplasmic dynein 1 intermediate chain 2	Dync1i2	>tr|A2BFF7|A2BFF7_MOUSE Dynein cytoplasmic 1 intermediate chain 2 OS=Mus musculus GN=Dync1i2 PE=2 SV=1;>sp|O88487|DC1I2_MOUSE Cytoplasmic dynein 1 intermediate chain 2 OS=Mus musculus GN=Dync1i2 PE=2 SV=1;>tr|A2BFF8|A2BFF8_MOUSE Cytoplasmic dynein 1 interm	11	19	19	3	13	15	16	13	7	10	16	16	16	11	9	10	13	15	16	13	7	10	16	16	16	11	9	10	2	3	3	2	1	1	3	2	3	1	1	1	50.7	50.7	8.7	68.393	612
A2BGJ4;Q8VDG5;A2BGJ3;Q8VDG5-2	A2BGJ4;Q8VDG5	Phosphopantothenate--cysteine ligase	Ppcs	>tr|A2BGJ4|A2BGJ4_MOUSE MCG4218, isoform CRA_b OS=Mus musculus GN=Ppcs PE=4 SV=1;>sp|Q8VDG5|PPCS_MOUSE Phosphopantothenate--cysteine ligase OS=Mus musculus GN=Ppcs PE=2 SV=1	4	11	11	11	10	6	10	4	4	3	11	11	11	7	6	5	10	6	10	4	4	3	11	11	11	7	6	5	10	6	10	4	4	3	11	11	11	7	6	5	35.7	35.7	35.7	33.794	311
A2BGM2;Q9CQI7;A2CES4	A2BGM2;Q9CQI7;A2CES4	U2 small nuclear ribonucleoprotein B	Snrpb2	>tr|A2BGM2|A2BGM2_MOUSE MCG19497, isoform CRA_c OS=Mus musculus GN=Snrpb2 PE=4 SV=1;>sp|Q9CQI7|RU2B_MOUSE U2 small nuclear ribonucleoprotein B OS=Mus musculus GN=Snrpb2 PE=2 SV=1;>tr|A2CES4|A2CES4_MOUSE U2 small nuclear ribonucleoprotein B (Fragment) OS=	3	8	6	6	4	7	6	5	2	3	7	7	5	3	4	4	2	5	4	4	2	2	5	5	3	2	2	3	2	5	4	4	2	2	5	5	3	2	2	3	49.3	44.9	44.9	25.323	225
A2BGN7;Q9D8X0	A2BGN7;Q9D8X0	Protein MANBAL	Manbal	>tr|A2BGN7|A2BGN7_MOUSE Mannosidase beta A lysosomal-like OS=Mus musculus GN=Manbal PE=4 SV=1;>sp|Q9D8X0|MANBL_MOUSE Protein MANBAL OS=Mus musculus GN=Manbal PE=2 SV=2	2	3	3	3	1	1	1	2	2	3	1	1	1	3	3	3	1	1	1	2	2	3	1	1	1	3	3	3	1	1	1	2	2	3	1	1	1	3	3	3	47.1	47.1	47.1	9.3679	85
A2BH07;Q9CXW4;D3Z3K1;A2BH06;E9PYL9;E9PZB3;D3YW69;E9Q0L4	A2BH07;Q9CXW4;D3Z3K1;A2BH06;E9PYL9;E9PZB3;D3YW69	60S ribosomal protein L11	Rpl11;Gm10288;Gm10036;Gm5093;Gm7589	>tr|A2BH07|A2BH07_MOUSE MCG5487, isoform CRA_b OS=Mus musculus GN=Rpl11 PE=3 SV=1;>sp|Q9CXW4|RL11_MOUSE 60S ribosomal protein L11 OS=Mus musculus GN=Rpl11 PE=1 SV=4;>tr|D3Z3K1|D3Z3K1_MOUSE MCG11809 OS=Mus musculus GN=Gm10288 PE=3 SV=1;>tr|A2BH06|A2BH06_MOU	8	13	13	13	11	13	13	5	7	7	13	12	13	10	9	11	11	13	13	5	7	7	13	12	13	10	9	11	11	13	13	5	7	7	13	12	13	10	9	11	80.3	80.3	80.3	20.252	178
A2BH28;Q9Z1F9;H3BLR3;H3BLM2;H3BJQ2	A2BH28;Q9Z1F9	SUMO-activating enzyme subunit 2	Uba2	>tr|A2BH28|A2BH28_MOUSE Ubiquitin-like 1 (Sentrin) activating enzyme E1B OS=Mus musculus GN=Uba2 PE=3 SV=1;>sp|Q9Z1F9|SAE2_MOUSE SUMO-activating enzyme subunit 2 OS=Mus musculus GN=Uba2 PE=2 SV=1	5	14	14	14	8	8	9	6	4	6	10	8	10	6	5	6	8	8	9	6	4	6	10	8	10	6	5	6	8	8	9	6	4	6	10	8	10	6	5	6	31	31	31	70.568	638
A2BH30;Q8K2F8;F6X2V9	A2BH30;Q8K2F8	Protein LSM14 homolog A	Lsm14a	>tr|A2BH30|A2BH30_MOUSE LSM14 homolog A (SCD6, S. cerevisiae) OS=Mus musculus GN=Lsm14a PE=4 SV=1;>sp|Q8K2F8|LS14A_MOUSE Protein LSM14 homolog A OS=Mus musculus GN=Lsm14a PE=1 SV=1	3	10	10	10	6	6	7	2	2	3	7	8	9	4	5	3	6	6	7	2	2	3	7	8	9	4	5	3	6	6	7	2	2	3	7	8	9	4	5	3	25.8	25.8	25.8	50.545	462
A2BH31;Q8C5N5;F6SGV3	A2BH31;Q8C5N5;F6SGV3	Programmed cell death protein 2-like	Pdcd2l	>tr|A2BH31|A2BH31_MOUSE Programmed cell death 2-like OS=Mus musculus GN=Pdcd2l PE=4 SV=1;>sp|Q8C5N5|PDD2L_MOUSE Programmed cell death protein 2-like OS=Mus musculus GN=Pdcd2l PE=2 SV=1;>tr|F6SGV3|F6SGV3_MOUSE Programmed cell death protein 2-like (Fragment)	3	2	2	2	2	2	2	0	0	0	2	2	2	1	0	1	2	2	2	0	0	0	2	2	2	1	0	1	2	2	2	0	0	0	2	2	2	1	0	1	10.2	10.2	10.2	39.955	364
A2BH81;Q91WM1;Q91WM1-2;A2BH82;A2BH83	A2BH81;Q91WM1;Q91WM1-2	Spermatid perinuclear RNA-binding protein	Strbp	>tr|A2BH81|A2BH81_MOUSE Spermatid perinuclear RNA binding protein OS=Mus musculus GN=Strbp PE=4 SV=1;>sp|Q91WM1|STRBP_MOUSE Spermatid perinuclear RNA-binding protein OS=Mus musculus GN=Strbp PE=1 SV=1;>sp|Q91WM1-2|STRBP_MOUSE Isoform 2 of Spermatid perinuc	5	9	5	5	7	7	5	3	3	2	5	6	7	3	1	0	3	3	2	1	1	1	2	3	3	0	0	0	3	3	2	1	1	1	2	3	3	0	0	0	14.6	8.6	8.6	73.704	672
A2BH85;Q9WV08	A2BH85;Q9WV08	Apelin receptor	Aplnr	>tr|A2BH85|A2BH85_MOUSE Angiotensin receptor-like 1 OS=Mus musculus GN=Aplnr PE=3 SV=1;>sp|Q9WV08|APJ_MOUSE Apelin receptor OS=Mus musculus GN=Aplnr PE=2 SV=1	2	1	1	1	0	0	0	0	0	0	0	0	0	1	1	1	0	0	0	0	0	0	0	0	0	1	1	1	0	0	0	0	0	0	0	0	0	1	1	1	4	4	4	42.266	377
A2BI54;Q9CQM1	A2BI54;Q9CQM1	Uncharacterized protein C1orf210 homolog	2610528J11Rik	>tr|A2BI54|A2BI54_MOUSE Novel protein (2610528J11Rik) OS=Mus musculus GN=2610528J11Rik PE=4 SV=1;>sp|Q9CQM1|CA210_MOUSE Uncharacterized protein C1orf210 homolog OS=Mus musculus PE=2 SV=1	2	1	1	1	0	0	1	1	0	1	1	0	1	1	1	1	0	0	1	1	0	1	1	0	1	1	1	1	0	0	1	1	0	1	1	0	1	1	1	1	38.7	38.7	38.7	11.532	111
A2BIM8;A2AKN9;A2CGB6;P02762;B5TE76;P04938;F6VEU0;A2CEK7;A9C496;F8WGZ4;A9C497;A2CEL0;E9Q508;E9PVV9	A2BIM8;A2AKN9;A2CGB6;P02762;B5TE76;P04938;F6VEU0;A2CEK7;A9C496;F8WGZ4;A9C497;A2CEL0;E9Q508;E9PVV9	Major urinary protein 6;Major urinary proteins 11 and 8	OTTMUSG00000007486;Mup2;OTTMUSG00000015595;Mup6;Mup14;Mup8;Mup1;Mup12	>tr|A2BIM8|A2BIM8_MOUSE Major urinary protein 16 OS=Mus musculus GN=OTTMUSG00000007486 PE=3 SV=1;>tr|A2AKN9|A2AKN9_MOUSE Major urinary protein 4 OS=Mus musculus GN=Mup2 PE=3 SV=1;>tr|A2CGB6|A2CGB6_MOUSE Major urinary protein 2 OS=Mus musculus GN=OTTMUSG000	14	10	1	0	5	9	9	2	1	2	7	8	8	3	1	1	0	1	1	0	0	0	0	0	0	0	0	0	0	0	0	0	0	0	0	0	0	0	0	0	78.5	13.3	0	20.762	181
A2BIN1;P11589	A2BIN1;P11589	Major urinary protein 2	Mup10;Mup2	>tr|A2BIN1|A2BIN1_MOUSE Major urinary protein 8 OS=Mus musculus GN=Mup10 PE=2 SV=1;>sp|P11589|MUP2_MOUSE Major urinary protein 2 OS=Mus musculus GN=Mup2 PE=1 SV=1	2	10	10	1	5	9	9	2	1	2	8	8	8	3	1	1	5	9	9	2	1	2	8	8	8	3	1	1	0	1	1	0	0	0	1	0	0	0	0	0	76.1	76.1	10.6	20.681	180
A2CF85;P39655	A2CF85;P39655	Arachidonate 12-lipoxygenase, 12S-type	Alox12	>tr|A2CF85|A2CF85_MOUSE Arachidonate 12-lipoxygenase OS=Mus musculus GN=Alox12 PE=2 SV=1;>sp|P39655|LOX12_MOUSE Arachidonate 12-lipoxygenase, 12S-type OS=Mus musculus GN=Alox12 PE=1 SV=4	2	2	2	2	0	1	1	1	1	1	0	0	0	2	2	2	0	1	1	1	1	1	0	0	0	2	2	2	0	1	1	1	1	1	0	0	0	2	2	2	3.6	3.6	3.6	75.389	663
A2CF88;P39654	A2CF88;P39654	Arachidonate 12-lipoxygenase, leukocyte-type	Alox15;Alox12l	>tr|A2CF88|A2CF88_MOUSE Arachidonate 15-lipoxygenase OS=Mus musculus GN=Alox15 PE=3 SV=1;>sp|P39654|LX12L_MOUSE Arachidonate 12-lipoxygenase, leukocyte-type OS=Mus musculus GN=Alox12l PE=1 SV=4	2	6	6	6	4	3	5	1	0	2	4	5	5	2	1	0	4	3	5	1	0	2	4	5	5	2	1	0	4	3	5	1	0	2	4	5	5	2	1	0	13.4	13.4	13.4	75.444	663
A2CFA7;Q60692	A2CFA7;Q60692	Proteasome subunit beta type;Proteasome subunit beta type-6	Psmb6	>tr|A2CFA7|A2CFA7_MOUSE Proteasome subunit beta type OS=Mus musculus GN=Psmb6 PE=3 SV=1;>sp|Q60692|PSB6_MOUSE Proteasome subunit beta type-6 OS=Mus musculus GN=Psmb6 PE=1 SV=3	2	6	6	6	5	5	6	5	5	5	5	5	5	5	5	6	5	5	6	5	5	5	5	5	5	5	5	6	5	5	6	5	5	5	5	5	5	5	5	6	38.2	38.2	38.2	25.378	238
A2CFC3;Q91XF4	A2CFC3;Q91XF4	E3 ubiquitin-protein ligase RNF167	Rnf167	>tr|A2CFC3|A2CFC3_MOUSE Ring finger protein 167 OS=Mus musculus GN=Rnf167 PE=4 SV=1;>sp|Q91XF4|RN167_MOUSE E3 ubiquitin-protein ligase RNF167 OS=Mus musculus GN=Rnf167 PE=2 SV=1	2	3	3	3	2	2	2	3	3	3	2	2	1	2	2	2	2	2	2	3	3	3	2	2	1	2	2	2	2	2	2	3	3	3	2	2	1	2	2	2	11.8	11.8	11.8	38.014	347
A2CFD0;Q7TNE3;Q5SX56	A2CFD0;Q7TNE3;Q5SX56	Sperm-associated antigen 7	Spag7	>tr|A2CFD0|A2CFD0_MOUSE Sperm associated antigen 7 OS=Mus musculus GN=Spag7 PE=4 SV=1;>sp|Q7TNE3|SPAG7_MOUSE Sperm-associated antigen 7 OS=Mus musculus GN=Spag7 PE=1 SV=1;>tr|Q5SX56|Q5SX56_MOUSE Sperm associated antigen 7 (Fragment) OS=Mus musculus GN=Spag	3	3	3	3	2	1	2	0	0	0	2	2	1	0	0	0	2	1	2	0	0	0	2	2	1	0	0	0	2	1	2	0	0	0	2	2	1	0	0	0	26.4	26.4	26.4	25.921	227
A2CG14;P63321	A2CG14;P63321	Ras-related protein Ral-A	Rala	>tr|A2CG14|A2CG14_MOUSE V-ral simian leukemia viral oncogene homolog A (Ras related) OS=Mus musculus GN=Rala PE=4 SV=1;>sp|P63321|RALA_MOUSE Ras-related protein Ral-A OS=Mus musculus GN=Rala PE=1 SV=1	2	8	5	5	6	6	7	5	5	5	6	7	6	7	7	7	4	4	5	4	4	4	4	4	4	5	5	5	4	4	5	4	4	4	4	4	4	5	5	5	46.6	29.1	29.1	23.553	206
A2CG22	A2CG22		Btnl6	>tr|A2CG22|A2CG22_MOUSE Butyrophilin-like 6 OS=Mus musculus GN=Btnl6 PE=4 SV=1	1	26	26	25	16	14	18	16	16	16	18	16	20	24	24	24	16	14	18	16	16	16	18	16	20	24	24	24	15	13	17	15	15	15	17	15	19	23	23	23	56.8	56.8	55.1	61.018	539
A2CG29;D3Z0Y7	A2CG29;D3Z0Y7		Btn3a3	>tr|A2CG29|A2CG29_MOUSE Butyrophilin, subfamily 3, member A3 OS=Mus musculus GN=Btnl4 PE=4 SV=1;>tr|D3Z0Y7|D3Z0Y7_MOUSE Protein Btn3a3 OS=Mus musculus GN=Btnl4 PE=4 SV=1	2	3	2	2	2	3	3	3	3	3	2	1	2	2	3	3	1	2	2	2	2	2	1	0	1	1	2	2	1	2	2	2	2	2	1	0	1	1	2	2	5.8	4.3	4.3	65.885	586
A2CG35;P35283	A2CG35;P35283	Ras-related protein Rab-12	Rab12	>tr|A2CG35|A2CG35_MOUSE RAB12, member RAS oncogene family OS=Mus musculus GN=Rab12 PE=3 SV=1;>sp|P35283|RAB12_MOUSE Ras-related protein Rab-12 OS=Mus musculus GN=Rab12 PE=1 SV=3	2	3	2	2	2	2	2	2	1	2	3	2	3	1	2	2	1	1	1	1	0	1	2	1	2	0	1	1	1	1	1	1	0	1	2	1	2	0	1	1	10	6.2	6.2	32.238	291
A2RRZ9;Q6QNU9	A2RRZ9;Q6QNU9	Toll-like receptor 12	Tlr12	>tr|A2RRZ9|A2RRZ9_MOUSE Toll-like receptor 12 OS=Mus musculus GN=Tlr12 PE=2 SV=1;>sp|Q6QNU9|TLR12_MOUSE Toll-like receptor 12 OS=Mus musculus GN=Tlr12 PE=2 SV=1	2	5	5	5	2	2	1	3	2	3	1	1	2	5	5	5	2	2	1	3	2	3	1	1	2	5	5	5	2	2	1	3	2	3	1	1	2	5	5	5	6	6	6	99.944	906
A2RS22;Q9WUM3;D3YUG6	A2RS22;Q9WUM3	Coronin-1B	Coro1b	>tr|A2RS22|A2RS22_MOUSE Coronin, actin binding protein 1B OS=Mus musculus GN=Coro1b PE=2 SV=1;>sp|Q9WUM3|COR1B_MOUSE Coronin-1B OS=Mus musculus GN=Coro1b PE=1 SV=1	3	22	22	21	18	18	18	10	10	14	18	18	20	12	16	16	18	18	18	10	10	14	18	18	20	12	16	16	17	17	17	9	9	13	17	17	19	11	15	15	47.7	47.7	46.1	53.912	484
A2RS23;Q11136;G3UXC5	A2RS23;Q11136	Xaa-Pro dipeptidase	Pepd	>tr|A2RS23|A2RS23_MOUSE Peptidase D OS=Mus musculus GN=Pepd PE=2 SV=1;>sp|Q11136|PEPD_MOUSE Xaa-Pro dipeptidase OS=Mus musculus GN=Pepd PE=2 SV=3	3	18	18	18	13	14	15	14	10	12	15	14	14	15	15	15	13	14	15	14	10	12	15	14	14	15	15	15	13	14	15	14	10	12	15	14	14	15	15	15	41	41	41	55.028	493
A2RS53;Q9R0Q3;F6V6T4;E9PVS9;Q8BPI2	A2RS53;Q9R0Q3;F6V6T4;E9PVS9;Q8BPI2	Transmembrane emp24 domain-containing protein 2	Tmed2	>tr|A2RS53|A2RS53_MOUSE Transmembrane emp24 domain trafficking protein 2 OS=Mus musculus GN=Tmed2 PE=2 SV=1;>sp|Q9R0Q3|TMED2_MOUSE Transmembrane emp24 domain-containing protein 2 OS=Mus musculus GN=Tmed2 PE=1 SV=1;>tr|F6V6T4|F6V6T4_MOUSE Transmembrane emp2	5	9	9	9	7	8	7	8	7	8	7	7	8	9	9	8	7	8	7	8	7	8	7	7	8	9	9	8	7	8	7	8	7	8	7	7	8	9	9	8	46.3	46.3	46.3	22.705	201
A2RS58;P47941	A2RS58;P47941	Crk-like protein	Crkl	>tr|A2RS58|A2RS58_MOUSE V-crk sarcoma virus CT10 oncogene homolog (Avian)-like OS=Mus musculus GN=Crkl PE=2 SV=1;>sp|P47941|CRKL_MOUSE Crk-like protein OS=Mus musculus GN=Crkl PE=1 SV=2	2	10	10	10	7	6	8	3	3	3	7	7	8	2	1	5	7	6	8	3	3	3	7	7	8	2	1	5	7	6	8	3	3	3	7	7	8	2	1	5	45.5	45.5	45.5	33.83	303
A2RS68;Q62376;Q62376-2;Q6ZWP0;Q99LY5	A2RS68;Q62376	U1 small nuclear ribonucleoprotein 70 kDa	Snrnp70	>tr|A2RS68|A2RS68_MOUSE Small nuclear ribonucleoprotein 70 (U1) OS=Mus musculus GN=Snrnp70 PE=2 SV=1;>sp|Q62376|RU17_MOUSE U1 small nuclear ribonucleoprotein 70 kDa OS=Mus musculus GN=Snrnp70 PE=1 SV=2	5	18	18	18	13	12	15	8	9	8	16	14	16	12	12	10	13	12	15	8	9	8	16	14	16	12	12	10	13	12	15	8	9	8	16	14	16	12	12	10	50	50	50	51.991	448
A2RS96;Q9CXE7;E9PXY3;E9Q2J2;Q3V440;Q8C5H9;D3Z615	A2RS96;Q9CXE7	Transmembrane emp24 domain-containing protein 5	Tmed5	>tr|A2RS96|A2RS96_MOUSE Transmembrane emp24 protein transport domain containing 5 OS=Mus musculus GN=Tmed5 PE=2 SV=1;>sp|Q9CXE7|TMED5_MOUSE Transmembrane emp24 domain-containing protein 5 OS=Mus musculus GN=Tmed5 PE=2 SV=1	7	5	5	5	4	5	4	5	5	5	5	5	5	5	5	5	4	5	4	5	5	5	5	5	5	5	5	5	4	5	4	5	5	5	5	5	5	5	5	5	22.3	22.3	22.3	26.172	229
A2RSC2;Q9DBK0	A2RSC2;Q9DBK0	Acyl-coenzyme A thioesterase 12	Acot12	>tr|A2RSC2|A2RSC2_MOUSE Acyl-CoA thioesterase 12 OS=Mus musculus GN=Acot12 PE=2 SV=1;>sp|Q9DBK0|ACO12_MOUSE Acyl-coenzyme A thioesterase 12 OS=Mus musculus GN=Acot12 PE=2 SV=1	2	13	13	13	9	9	10	1	4	0	8	8	8	3	1	1	9	9	10	1	4	0	8	8	8	3	1	1	9	9	10	1	4	0	8	8	8	3	1	1	31.1	31.1	31.1	61.761	556
A2RSF1;Q8K4M5;Q8VI86;G8JL54;F7BZY0;F7BCN0	A2RSF1;Q8K4M5;Q8VI86;G8JL54	COMM domain-containing protein 1	Commd1	>tr|A2RSF1|A2RSF1_MOUSE COMM domain containing 1 OS=Mus musculus GN=Commd1 PE=2 SV=1;>sp|Q8K4M5|COMD1_MOUSE COMM domain-containing protein 1 OS=Mus musculus GN=Commd1 PE=2 SV=2;>tr|Q8VI86|Q8VI86_MOUSE COMM domain containing 1 OS=Mus musculus GN=Commd1 PE=2	6	4	4	4	1	2	3	2	3	2	3	1	2	1	1	1	1	2	3	2	3	2	3	1	2	1	1	1	1	2	3	2	3	2	3	1	2	1	1	1	20.2	20.2	20.2	20.996	188
A2RSJ4	A2RSJ4	UHRF1-binding protein 1-like	Uhrf1bp1l	>sp|A2RSJ4|UH1BL_MOUSE UHRF1-binding protein 1-like OS=Mus musculus GN=Uhrf1bp1l PE=2 SV=2	1	4	4	3	1	2	3	1	0	1	3	1	2	1	1	1	1	2	3	1	0	1	3	1	2	1	1	1	1	1	2	1	0	1	2	0	1	1	1	1	3.3	3.3	2.2	161.94	1457
A2RSQ0	A2RSQ0	DENN domain-containing protein 5B	Dennd5b	>sp|A2RSQ0|DEN5B_MOUSE DENN domain-containing protein 5B OS=Mus musculus GN=Dennd5b PE=1 SV=2	1	8	8	8	7	5	5	3	2	1	3	6	5	2	2	2	7	5	5	3	2	1	3	6	5	2	2	2	7	5	5	3	2	1	3	6	5	2	2	2	8.2	8.2	8.2	144.63	1274
A2RSS6;Q64191	A2RSS6;Q64191	N(4)-(beta-N-acetylglucosaminyl)-L-asparaginase;Glycosylasparaginase alpha chain;Glycosylasparaginase beta chain	Aga	>tr|A2RSS6|A2RSS6_MOUSE Aspartylglucosaminidase OS=Mus musculus GN=Aga PE=2 SV=1;>sp|Q64191|ASPG_MOUSE N(4)-(beta-N-acetylglucosaminyl)-L-asparaginase OS=Mus musculus GN=Aga PE=2 SV=1	2	2	2	2	1	1	1	0	0	0	0	1	1	0	0	0	1	1	1	0	0	0	0	1	1	0	0	0	1	1	1	0	0	0	0	1	1	0	0	0	8.4	8.4	8.4	37.022	346
A2RSS9;Q9EQX0;Q9EQX0-2;Q7TSD1;Q811T4	A2RSS9;Q9EQX0;Q9EQX0-2;Q7TSD1	Appetite-regulating hormone;Ghrelin;Obestatin	Ghrl	>tr|A2RSS9|A2RSS9_MOUSE Ghrelin OS=Mus musculus GN=Ghrl PE=4 SV=1;>sp|Q9EQX0|GHRL_MOUSE Appetite-regulating hormone OS=Mus musculus GN=Ghrl PE=1 SV=1;>sp|Q9EQX0-2|GHRL_MOUSE Isoform 2 of Appetite-regulating hormone OS=Mus musculus GN=Ghrl;>tr|Q7TSD1|Q7TSD1	5	3	3	3	1	2	1	1	1	1	2	3	1	0	1	1	1	2	1	1	1	1	2	3	1	0	1	1	1	2	1	1	1	1	2	3	1	0	1	1	33.3	33.3	33.3	13.207	117
A2RST1;E0CZ62	A2RST1;E0CZ62		Mgst2	>tr|A2RST1|A2RST1_MOUSE Microsomal glutathione S-transferase 2 OS=Mus musculus GN=Mgst2 PE=2 SV=1;>tr|E0CZ62|E0CZ62_MOUSE Microsomal glutathione S-transferase 2, isoform CRA_a OS=Mus musculus GN=Mgst2 PE=4 SV=1	2	2	2	2	1	1	2	0	2	1	2	2	1	2	1	1	1	1	2	0	2	1	2	2	1	2	1	1	1	1	2	0	2	1	2	2	1	2	1	1	17.7	17.7	17.7	16.786	147
A2RSV8;P19783	A2RSV8;P19783	Cytochrome c oxidase subunit 4 isoform 1, mitochondrial	Cox4i1	>tr|A2RSV8|A2RSV8_MOUSE Cytochrome c oxidase subunit IV isoform 1 OS=Mus musculus GN=Cox4i1 PE=2 SV=1;>sp|P19783|COX41_MOUSE Cytochrome c oxidase subunit 4 isoform 1, mitochondrial OS=Mus musculus GN=Cox4i1 PE=1 SV=2	2	14	14	13	12	13	13	12	10	11	12	13	13	13	13	13	12	13	13	12	10	11	12	13	13	13	13	13	12	12	12	11	9	10	11	12	12	12	12	12	60.4	60.4	60.4	19.53	169
A2RSY6;A2RSY6-2;A2RSY6-3	A2RSY6;A2RSY6-2;A2RSY6-3	TRMT1-like protein	Trmt1l	>sp|A2RSY6|TRM1L_MOUSE TRMT1-like protein OS=Mus musculus GN=Trmt1l PE=2 SV=1;>sp|A2RSY6-2|TRM1L_MOUSE Isoform 2 of TRMT1-like protein OS=Mus musculus GN=Trmt1l;>sp|A2RSY6-3|TRM1L_MOUSE Isoform 3 of TRMT1-like protein OS=Mus musculus GN=Trmt1l	3	6	6	6	1	3	5	1	0	0	4	5	4	1	1	1	1	3	5	1	0	0	4	5	4	1	1	1	1	3	5	1	0	0	4	5	4	1	1	1	10.6	10.6	10.6	80.86	728
A2RT28;Q499X9	A2RT28;Q499X9	Methionine--tRNA ligase, mitochondrial	Mars2	>tr|A2RT28|A2RT28_MOUSE Methionine-tRNA synthetase 2 (Mitochondrial) OS=Mus musculus GN=Mars2 PE=2 SV=1;>sp|Q499X9|SYMM_MOUSE Methionine--tRNA ligase, mitochondrial OS=Mus musculus GN=Mars2 PE=2 SV=2	2	8	8	8	5	3	5	2	2	0	6	5	7	3	3	3	5	3	5	2	2	0	6	5	7	3	3	3	5	3	5	2	2	0	6	5	7	3	3	3	18.8	18.8	18.8	65.804	586
A2RT57;Q9CQC8;Q9CQC8-2	A2RT57;Q9CQC8;Q9CQC8-2	Maspardin	Spg21	>tr|A2RT57|A2RT57_MOUSE Spastic paraplegia 21 homolog (Human) OS=Mus musculus GN=Spg21 PE=2 SV=1;>sp|Q9CQC8|SPG21_MOUSE Maspardin OS=Mus musculus GN=Spg21 PE=1 SV=1;>sp|Q9CQC8-2|SPG21_MOUSE Isoform 2 of Maspardin OS=Mus musculus GN=Spg21	3	6	6	6	4	3	4	3	4	3	3	3	3	3	2	2	4	3	4	3	4	3	3	3	3	3	2	2	4	3	4	3	4	3	3	3	3	3	2	2	24	24	24	34.952	308
A2RT67;F7B6S5;G3UYA1	A2RT67;F7B6S5;G3UYA1	DENN domain-containing protein 3	Dennd3	>sp|A2RT67|DEND3_MOUSE DENN domain-containing protein 3 OS=Mus musculus GN=Dennd3 PE=2 SV=2;>tr|F7B6S5|F7B6S5_MOUSE DENN domain-containing protein 3 (Fragment) OS=Mus musculus GN=Dennd3 PE=4 SV=1;>tr|G3UYA1|G3UYA1_MOUSE DENN domain-containing protein 3 OS=	3	10	10	10	5	7	7	2	3	2	8	7	6	2	2	2	5	7	7	2	3	2	8	7	6	2	2	2	5	7	7	2	3	2	8	7	6	2	2	2	10.1	10.1	10.1	143.89	1274
A2RT92;Q9D1T5	A2RT92;Q9D1T5	Proline-rich protein 15	Prr15	>tr|A2RT92|A2RT92_MOUSE Proline rich 15 OS=Mus musculus GN=Prr15 PE=2 SV=1;>sp|Q9D1T5|PRR15_MOUSE Proline-rich protein 15 OS=Mus musculus GN=Prr15 PE=2 SV=1	2	5	5	5	5	5	5	0	0	1	5	4	4	0	0	0	5	5	5	0	0	1	5	4	4	0	0	0	5	5	5	0	0	1	5	4	4	0	0	0	48.4	48.4	48.4	13.655	122
A2RTC8;Q3KNM2;F6W8T3	A2RTC8;Q3KNM2	E3 ubiquitin-protein ligase MARCH5	2013-03-05	>tr|A2RTC8|A2RTC8_MOUSE MCG13921, isoform CRA_b OS=Mus musculus GN=March5 PE=2 SV=1;>sp|Q3KNM2|MARH5_MOUSE E3 ubiquitin-protein ligase MARCH5 OS=Mus musculus GN=March5 PE=2 SV=1	3	14	14	14	6	7	7	7	3	4	9	10	12	12	11	12	6	7	7	7	3	4	9	10	12	12	11	12	6	7	7	7	3	4	9	10	12	12	11	12	59.7	59.7	59.7	31.231	278
A2RTH5	A2RTH5		Lcmt1	>tr|A2RTH5|A2RTH5_MOUSE Leucine carboxyl methyltransferase 1 OS=Mus musculus GN=Lcmt1 PE=2 SV=1	1	7	7	7	2	1	3	1	0	0	6	5	5	1	1	1	2	1	3	1	0	0	6	5	5	1	1	1	2	1	3	1	0	0	6	5	5	1	1	1	30.4	30.4	30.4	38.192	332
A2RTI3;O89017	A2RTI3;O89017	Legumain	Lgmn	>tr|A2RTI3|A2RTI3_MOUSE Legumain OS=Mus musculus GN=Lgmn PE=2 SV=1;>sp|O89017|LGMN_MOUSE Legumain OS=Mus musculus GN=Lgmn PE=1 SV=1	2	8	8	8	5	5	4	0	1	1	4	4	6	1	3	2	5	5	4	0	1	1	4	4	6	1	3	2	5	5	4	0	1	1	4	4	6	1	3	2	33.6	33.6	33.6	49.372	435
A2RTJ6;Q3UEZ8	A2RTJ6;Q3UEZ8	Sodium/bile acid cotransporter 4	Slc10a4	>tr|A2RTJ6|A2RTJ6_MOUSE MCG15713 OS=Mus musculus GN=Slc10a4 PE=2 SV=1;>sp|Q3UEZ8|NTCP4_MOUSE Sodium/bile acid cotransporter 4 OS=Mus musculus GN=Slc10a4 PE=2 SV=1	2	1	1	1	1	0	0	0	0	0	1	1	1	0	0	0	1	0	0	0	0	0	1	1	1	0	0	0	1	0	0	0	0	0	1	1	1	0	0	0	3.2	3.2	3.2	46.641	437
A2RTS9;F8WIW1;Q6XQH0;Q3ULK5	A2RTS9;F8WIW1;Q6XQH0;Q3ULK5	Galactose-3-O-sulfotransferase 2	Gal3st2;Gm9994;Gm6086	>tr|A2RTS9|A2RTS9_MOUSE Galactose-3-O-sulfotransferase 2 OS=Mus musculus GN=Gal3st2 PE=2 SV=1;>tr|F8WIW1|F8WIW1_MOUSE Protein Gm9994 OS=Mus musculus GN=Gm9994 PE=4 SV=1;>sp|Q6XQH0|G3ST2_MOUSE Galactose-3-O-sulfotransferase 2 OS=Mus musculus GN=Gal3st2 PE=2	4	19	19	19	11	11	14	12	12	12	13	12	13	13	18	16	11	11	14	12	12	12	13	12	13	13	18	16	11	11	14	12	12	12	13	12	13	13	18	16	55.8	55.8	55.8	47.112	396
A2RTT4;P61089;G5E8Z0;Q9CQ37	A2RTT4;P61089;G5E8Z0	Ubiquitin-conjugating enzyme E2 N	Ube2n;Ube2nl	>tr|A2RTT4|A2RTT4_MOUSE MCG4297 OS=Mus musculus GN=Ube2n PE=2 SV=1;>sp|P61089|UBE2N_MOUSE Ubiquitin-conjugating enzyme E2 N OS=Mus musculus GN=Ube2n PE=1 SV=1;>tr|G5E8Z0|G5E8Z0_MOUSE MCG48878 OS=Mus musculus GN=Ube2nl PE=3 SV=1	4	10	10	10	8	9	10	7	5	7	10	10	10	8	8	7	8	9	10	7	5	7	10	10	10	8	8	7	8	9	10	7	5	7	10	10	10	8	8	7	75.7	75.7	75.7	17.138	152
A2RTW8;Q9D2R4	A2RTW8;Q9D2R4	Transmembrane emp24 domain-containing protein 11	Tmed11	>tr|A2RTW8|A2RTW8_MOUSE RIKEN cDNA 1810008K16 OS=Mus musculus GN=Tmed11 PE=2 SV=1;>sp|Q9D2R4|TMD11_MOUSE Transmembrane emp24 domain-containing protein 11 OS=Mus musculus GN=Tmed11 PE=2 SV=1	2	4	4	4	0	0	0	0	0	0	2	1	0	3	4	2	0	0	0	0	0	0	2	1	0	3	4	2	0	0	0	0	0	0	2	1	0	3	4	2	24.2	24.2	24.2	24.842	215
A3KCG1;Q8BWG9	A3KCG1;Q8BWG9	Calcium release-activated calcium channel protein 1	Orai1	>tr|A3KCG1|A3KCG1_MOUSE Calcium release-activated calcium channel 1 OS=Mus musculus GN=Orai1 PE=2 SV=1;>sp|Q8BWG9|CRCM1_MOUSE Calcium release-activated calcium channel protein 1 OS=Mus musculus GN=Orai1 PE=2 SV=1	2	4	4	4	4	2	4	3	3	3	1	1	3	3	3	3	4	2	4	3	3	3	1	1	3	3	3	3	4	2	4	3	3	3	1	1	3	3	3	3	20.1	20.1	20.1	33.061	304
A3KFW0;Q8BFY6	A3KFW0;Q8BFY6	Peflin	Pef1	>tr|A3KFW0|A3KFW0_MOUSE Penta-EF hand domain containing 1 OS=Mus musculus GN=Pef1 PE=4 SV=1;>sp|Q8BFY6|PEF1_MOUSE Peflin OS=Mus musculus GN=Pef1 PE=2 SV=1	2	5	5	5	4	4	5	5	4	5	5	5	5	5	5	5	4	4	5	5	4	5	5	5	5	5	5	5	4	4	5	5	4	5	5	5	5	5	5	5	18.2	18.2	18.2	29.227	275
A3KFW2;Q99JR5;H3BJ97;Q4FJX7;H3BKM8	A3KFW2;Q99JR5;H3BJ97;Q4FJX7	Tubulointerstitial nephritis antigen-like	Tinagl1	>tr|A3KFW2|A3KFW2_MOUSE Tubulointerstitial nephritis antigen-like 1 OS=Mus musculus GN=Tinagl1 PE=3 SV=1;>sp|Q99JR5|TINAL_MOUSE Tubulointerstitial nephritis antigen-like OS=Mus musculus GN=Tinagl1 PE=1 SV=1;>tr|H3BJ97|H3BJ97_MOUSE Tubulointerstitial nephri	5	6	6	6	1	2	3	0	0	0	5	5	5	1	1	1	1	2	3	0	0	0	5	5	5	1	1	1	1	2	3	0	0	0	5	5	5	1	1	1	14.8	14.8	14.8	52.664	466
A3KG50;Q9JJZ4;F6SPK0;B1AWT7	A3KG50;Q9JJZ4;F6SPK0;B1AWT7	Ubiquitin-conjugating enzyme E2 J1	Ube2j1	>tr|A3KG50|A3KG50_MOUSE Ubiquitin-conjugating enzyme E2 J1 OS=Mus musculus GN=Ube2j1 PE=4 SV=1;>sp|Q9JJZ4|UB2J1_MOUSE Ubiquitin-conjugating enzyme E2 J1 OS=Mus musculus GN=Ube2j1 PE=1 SV=2;>tr|F6SPK0|F6SPK0_MOUSE Ubiquitin-conjugating enzyme E2 J1 (Fragmen	4	6	6	6	5	4	5	3	2	3	5	5	6	3	5	4	5	4	5	3	2	3	5	5	6	3	5	4	5	4	5	3	2	3	5	5	6	3	5	4	21.1	21.1	21.1	34.989	318
A3KG93;Q6ZQ88;G8JL40;F6Z4I3;F6ZC60	A3KG93;Q6ZQ88;G8JL40	Lysine-specific histone demethylase 1A	Kdm1a	>tr|A3KG93|A3KG93_MOUSE Amine oxidase (Flavin containing) domain 2 OS=Mus musculus GN=Kdm1a PE=4 SV=1;>sp|Q6ZQ88|KDM1A_MOUSE Lysine-specific histone demethylase 1A OS=Mus musculus GN=Kdm1a PE=1 SV=2;>tr|G8JL40|G8JL40_MOUSE Lysine-specific histone demethyla	5	16	16	16	11	13	16	3	1	1	11	14	13	5	7	6	11	13	16	3	1	1	11	14	13	5	7	6	11	13	16	3	1	1	11	14	13	5	7	6	19.9	19.9	19.9	94.658	873
A3KGB1;P61759;Q3TIR6	A3KGB1;P61759;Q3TIR6	Prefoldin subunit 3	Vbp1	>tr|A3KGB1|A3KGB1_MOUSE von Hippel-Lindau binding protein 1 OS=Mus musculus GN=Vbp1 PE=4 SV=1;>sp|P61759|PFD3_MOUSE Prefoldin subunit 3 OS=Mus musculus GN=Vbp1 PE=2 SV=2;>tr|Q3TIR6|Q3TIR6_MOUSE Prefoldin subunit 3 OS=Mus musculus GN=Vbp1 PE=2 SV=1	3	4	4	3	3	2	3	1	1	0	3	4	4	1	1	1	3	2	3	1	1	0	3	4	4	1	1	1	2	2	3	0	0	0	2	3	3	0	0	0	19.4	19.4	15.8	22.435	196
A3KGB4	A3KGB4	TBC1 domain family member 8B	Tbc1d8b	>sp|A3KGB4|TBC8B_MOUSE TBC1 domain family member 8B OS=Mus musculus GN=Tbc1d8b PE=2 SV=1	1	16	16	14	10	6	5	6	5	8	8	9	10	9	7	8	10	6	5	6	5	8	8	9	10	9	7	8	8	5	4	5	4	6	7	8	8	7	5	6	17.5	17.5	16.5	127.89	1114
A3KGB6;O88552	A3KGB6;O88552	Claudin-2	Cldn2	>tr|A3KGB6|A3KGB6_MOUSE Claudin 2 OS=Mus musculus GN=Cldn2 PE=4 SV=1;>sp|O88552|CLD2_MOUSE Claudin-2 OS=Mus musculus GN=Cldn2 PE=1 SV=1	2	2	2	2	1	1	2	2	2	2	1	2	2	2	2	2	1	1	2	2	2	2	1	2	2	2	2	2	1	1	2	2	2	2	1	2	2	2	2	2	11.7	11.7	11.7	24.483	230
A3KGF7;E9PYI3;A3KGF7-3;A3KGF7-2	A3KGF7;E9PYI3;A3KGF7-3;A3KGF7-2	1-phosphatidylinositol-4,5-bisphosphate phosphodiesterase beta-2	Plcb2	>sp|A3KGF7|PLCB2_MOUSE 1-phosphatidylinositol 4,5-bisphosphate phosphodiesterase beta-2 OS=Mus musculus GN=Plcb2 PE=2 SV=1;>tr|E9PYI3|E9PYI3_MOUSE 1-phosphatidylinositol 4,5-bisphosphate phosphodiesterase beta-2 OS=Mus musculus GN=Plcb2 PE=4 SV=1;>sp|A3KGF	4	1	1	1	1	1	1	0	0	0	0	0	0	0	0	0	1	1	1	0	0	0	0	0	0	0	0	0	1	1	1	0	0	0	0	0	0	0	0	0	1.1	1.1	1.1	134.54	1181
A3KGG9;Q9JHI5	A3KGG9;Q9JHI5	Isovaleryl-CoA dehydrogenase, mitochondrial	Ivd	>tr|A3KGG9|A3KGG9_MOUSE Isovaleryl coenzyme A dehydrogenase OS=Mus musculus GN=Ivd PE=3 SV=1;>sp|Q9JHI5|IVD_MOUSE Isovaleryl-CoA dehydrogenase, mitochondrial OS=Mus musculus GN=Ivd PE=1 SV=1	2	12	12	12	6	9	8	8	5	6	9	7	7	7	11	6	6	9	8	8	5	6	9	7	7	7	11	6	6	9	8	8	5	6	9	7	7	7	11	6	32.8	32.8	32.8	46.325	424
A3KGH2;Q91WT4	A3KGH2;Q91WT4	DnaJ homolog subfamily C member 17	Dnajc17	>tr|A3KGH2|A3KGH2_MOUSE DnaJ (Hsp40) homolog, subfamily C, member 17 OS=Mus musculus GN=Dnajc17 PE=4 SV=1;>sp|Q91WT4|DJC17_MOUSE DnaJ homolog subfamily C member 17 OS=Mus musculus GN=Dnajc17 PE=2 SV=1	2	2	2	2	1	1	0	0	0	0	0	0	2	0	0	0	1	1	0	0	0	0	0	0	2	0	0	0	1	1	0	0	0	0	0	0	2	0	0	0	10.6	10.6	10.6	34.465	303
A3KGJ7;E9Q5A8;Q60952;B7ZCN4	A3KGJ7;E9Q5A8;Q60952;B7ZCN4	Centrosome-associated protein CEP250	Cep250	>tr|A3KGJ7|A3KGJ7_MOUSE Centrosomal protein 250 OS=Mus musculus GN=Cep250 PE=4 SV=2;>tr|E9Q5A8|E9Q5A8_MOUSE Centrosome-associated protein CEP250 OS=Mus musculus GN=Cep250 PE=4 SV=1;>sp|Q60952|CP250_MOUSE Centrosome-associated protein CEP250 OS=Mus musculus	4	1	1	1	1	1	1	0	0	0	1	0	1	0	0	0	1	1	1	0	0	0	1	0	1	0	0	0	1	1	1	0	0	0	1	0	1	0	0	0	0.4	0.4	0.4	278.97	2435
A3KGK6;Q8C166;B7ZCP4;A3KGK7;E9Q806;B7ZCP5;F6R587;B7ZCP6;B7ZCP7;B7ZCP8	A3KGK6;Q8C166;B7ZCP4;A3KGK7	Copine-1	Cpne1	>tr|A3KGK6|A3KGK6_MOUSE Copine I OS=Mus musculus GN=Cpne1 PE=4 SV=1;>sp|Q8C166|CPNE1_MOUSE Copine-1 OS=Mus musculus GN=Cpne1 PE=1 SV=1;>tr|B7ZCP4|B7ZCP4_MOUSE Copine I OS=Mus musculus GN=Cpne1 PE=4 SV=1;>tr|A3KGK7|A3KGK7_MOUSE Copine I (Fragment) OS=Mus mu	10	9	8	9	5	7	6	7	5	5	8	7	6	7	3	4	4	6	5	6	4	4	7	6	5	6	2	3	5	7	6	7	5	5	8	7	6	7	3	4	17.5	17.5	17.5	58.886	536
A3KGQ6;Q9D898	A3KGQ6;Q9D898	Actin-related protein 2/3 complex subunit 5;Actin-related protein 2/3 complex subunit 5-like protein	Arpc5l	>tr|A3KGQ6|A3KGQ6_MOUSE Actin-related protein 2/3 complex subunit 5 OS=Mus musculus GN=Arpc5l PE=3 SV=1;>sp|Q9D898|ARP5L_MOUSE Actin-related protein 2/3 complex subunit 5-like protein OS=Mus musculus GN=Arpc5l PE=1 SV=1	2	9	9	9	3	7	5	3	3	4	7	7	8	6	3	4	3	7	5	3	3	4	7	7	8	6	3	4	3	7	5	3	3	4	7	7	8	6	3	4	75.2	75.2	75.2	17.109	153
A3KGQ8;Q9CW79;Q9CW79-2;REV__Q924H2;REV__G3X8S4;REV__Q3TE00;REV__E9Q7C1;REV__E9Q182;REV__F6XGR1	A3KGQ8;Q9CW79;Q9CW79-2	Golgin subfamily A member 1	Golga1	>tr|A3KGQ8|A3KGQ8_MOUSE Golgi autoantigen, golgin subfamily a, 1 OS=Mus musculus GN=Golga1 PE=4 SV=1;>sp|Q9CW79|GOGA1_MOUSE Golgin subfamily A member 1 OS=Mus musculus GN=Golga1 PE=1 SV=2;>sp|Q9CW79-2|GOGA1_MOUSE Isoform 2 of Golgin subfamily A member 1 OS	9	16	16	16	6	5	8	2	1	0	5	4	9	7	7	7	6	5	8	2	1	0	5	4	9	7	7	7	6	5	8	2	1	0	5	4	9	7	7	7	29.3	29.3	29.3	87.337	758
A3KGS3;E9Q4R6;A3KGS3-2;F7CGP0;F7AI67;Q6GYP7-5	A3KGS3;E9Q4R6;A3KGS3-2;F7CGP0	Ral GTPase-activating protein subunit alpha-2	Ralgapa2	>sp|A3KGS3|RGPA2_MOUSE Ral GTPase-activating protein subunit alpha-2 OS=Mus musculus GN=Ralgapa2 PE=1 SV=2;>tr|E9Q4R6|E9Q4R6_MOUSE Ral GTPase-activating protein subunit alpha-2 OS=Mus musculus GN=Ralgapa2 PE=4 SV=1;>sp|A3KGS3-2|RGPA2_MOUSE Isoform 2 of Ral	6	26	26	24	14	10	13	13	11	13	13	12	16	11	10	9	14	10	13	13	11	13	13	12	16	11	10	9	13	9	12	11	9	12	12	11	15	10	9	9	16.3	16.3	15.4	210.29	1872
A3KML5;P63082;E9Q9C5;D3Z3B2	A3KML5;P63082;E9Q9C5;D3Z3B2	V-type proton ATPase 16 kDa proteolipid subunit	Atp6v0c	>tr|A3KML5|A3KML5_MOUSE ATPase, H+ transporting, lysosomal V0 subunit C OS=Mus musculus GN=Atp6v0c PE=2 SV=1;>sp|P63082|VATL_MOUSE V-type proton ATPase 16 kDa proteolipid subunit OS=Mus musculus GN=Atp6v0c PE=2 SV=1;>tr|E9Q9C5|E9Q9C5_MOUSE V-type proton AT	4	3	3	3	1	1	2	3	2	3	1	2	2	3	3	3	1	1	2	3	2	3	1	2	2	3	3	3	1	1	2	3	2	3	1	2	2	3	3	3	31.6	31.6	31.6	15.808	155
A3KMP2;A3KMP2-2;D6RH59	A3KMP2;A3KMP2-2;D6RH59	Tetratricopeptide repeat protein 38	Ttc38	>sp|A3KMP2|TTC38_MOUSE Tetratricopeptide repeat protein 38 OS=Mus musculus GN=Ttc38 PE=2 SV=2;>sp|A3KMP2-2|TTC38_MOUSE Isoform 2 of Tetratricopeptide repeat protein 38 OS=Mus musculus GN=Ttc38;>tr|D6RH59|D6RH59_MOUSE Tetratricopeptide repeat protein 38 OS=	3	6	6	6	3	3	5	5	4	2	2	2	1	4	4	5	3	3	5	5	4	2	2	2	1	4	4	5	3	3	5	5	4	2	2	2	1	4	4	5	16.1	16.1	16.1	52.223	465
A3QK60;Q80VY9;Q5QNV3	A3QK60;Q80VY9;Q5QNV3	Putative ATP-dependent RNA helicase DHX33	Dhx33	>tr|A3QK60|A3QK60_MOUSE DEAH (Asp-Glu-Ala-His) box polypeptide 33 OS=Mus musculus GN=Dhx33 PE=4 SV=1;>sp|Q80VY9|DHX33_MOUSE Putative ATP-dependent RNA helicase DHX33 OS=Mus musculus GN=Dhx33 PE=1 SV=1;>tr|Q5QNV3|Q5QNV3_MOUSE DEAH (Asp-Glu-Ala-His) box poly	3	3	3	3	1	2	1	0	0	0	1	1	2	1	0	0	1	2	1	0	0	0	1	1	2	1	0	0	1	2	1	0	0	0	1	1	2	1	0	0	5.6	5.6	5.6	78.346	698
A4FUS1;P14131	A4FUS1;P14131	40S ribosomal protein S16	Rps16	>tr|A4FUS1|A4FUS1_MOUSE MCG123443 OS=Mus musculus GN=Rps16 PE=1 SV=1;>sp|P14131|RS16_MOUSE 40S ribosomal protein S16 OS=Mus musculus GN=Rps16 PE=2 SV=4	2	19	19	19	15	18	15	14	12	14	17	18	15	16	15	14	15	18	15	14	12	14	17	18	15	16	15	14	15	18	15	14	12	14	17	18	15	16	15	14	82.9	82.9	82.9	16.445	146
A4QMQ0;Q9CZD5;D3Z0H9;D3YWL2	A4QMQ0;Q9CZD5	Translation initiation factor IF-3, mitochondrial	Mtif3	>tr|A4QMQ0|A4QMQ0_MOUSE Mitochondrial translational initiation factor 3 OS=Mus musculus GN=Mtif3 PE=2 SV=1;>sp|Q9CZD5|IF3M_MOUSE Translation initiation factor IF-3, mitochondrial OS=Mus musculus GN=Mtif3 PE=1 SV=1	4	6	6	6	1	3	4	1	0	0	5	3	4	2	1	1	1	3	4	1	0	0	5	3	4	2	1	1	1	3	4	1	0	0	5	3	4	2	1	1	30.4	30.4	30.4	31.739	276
A5A4Y9;Q8K1L5;G3UZ30	A5A4Y9;Q8K1L5;G3UZ30	Protein phosphatase 1 regulatory subunit 11	Ppp1r11	>tr|A5A4Y9|A5A4Y9_MOUSE Protein phosphatase 1 regulatory subunit 11 OS=Mus musculus GN=Ppp1r11 PE=2 SV=1;>sp|Q8K1L5|PP1RB_MOUSE Protein phosphatase 1 regulatory subunit 11 OS=Mus musculus GN=Ppp1r11 PE=1 SV=1;>tr|G3UZ30|G3UZ30_MOUSE Protein phosphatase 1 r	3	4	4	4	3	3	3	1	1	1	4	3	4	1	1	1	3	3	3	1	1	1	4	3	4	1	1	1	3	3	3	1	1	1	4	3	4	1	1	1	42	42	42	14.532	131
A5D6P2;G3XA13;Q99NH2;F6S7Z1;B7ZNY3;E0CXL4;E0CY24;E0CZ83;Q99NH2-2;E0CZE2;E0CXR8;F6TSJ9;E0CX45;Q99NH2-3;E9PYJ2;F6UGU7;Q99NH2-4;Q99NH2-5;Q4JJC0;F6TB42;E0CXD3;E0CYB6	A5D6P2;G3XA13;Q99NH2;F6S7Z1;B7ZNY3;E0CXL4;E0CY24;E0CZ83;Q99NH2-2;E0CZE2;E0CXR8;F6TSJ9;E0CX45;Q99NH2-3;E9PYJ2;F6UGU7;Q99NH2-4;Q99NH2-5;Q4JJC0	Partitioning defective 3 homolog	Pard3	>tr|A5D6P2|A5D6P2_MOUSE Par-3 (Partitioning defective 3) homolog (C. elegans) OS=Mus musculus GN=Pard3 PE=2 SV=1;>tr|G3XA13|G3XA13_MOUSE Par-3 (Partitioning defective 3) homolog (C. elegans) OS=Mus musculus GN=Pard3 PE=4 SV=1;>sp|Q99NH2|PARD3_MOUSE Partiti	22	9	9	9	8	6	9	0	1	1	6	8	7	3	3	4	8	6	9	0	1	1	6	8	7	3	3	4	8	6	9	0	1	1	6	8	7	3	3	4	9.2	9.2	9.2	149.08	1334
A5D6P3;O35379;E9Q1I5;E9PZV7	A5D6P3;O35379	Multidrug resistance-associated protein 1	Abcc1	>tr|A5D6P3|A5D6P3_MOUSE ATP-binding cassette, sub-family C (CFTR/MRP), member 1 OS=Mus musculus GN=Abcc1 PE=2 SV=1;>sp|O35379|MRP1_MOUSE Multidrug resistance-associated protein 1 OS=Mus musculus GN=Abcc1 PE=1 SV=1	4	11	8	8	6	6	6	7	7	8	4	4	4	7	7	8	4	4	4	5	5	6	2	2	3	5	4	5	4	4	4	5	5	6	2	2	3	5	4	5	8.3	6.2	6.2	171.18	1528
A5D8Y6;Q9ET35;B1ATI4	A5D8Y6;Q9ET35;B1ATI4	Tumor necrosis factor receptor superfamily member 13B	Tnfrsf13b	>tr|A5D8Y6|A5D8Y6_MOUSE Tumor necrosis factor receptor superfamily, member 13b OS=Mus musculus GN=Tnfrsf13b PE=2 SV=1;>sp|Q9ET35|TR13B_MOUSE Tumor necrosis factor receptor superfamily member 13B OS=Mus musculus GN=Tnfrsf13b PE=2 SV=1;>tr|B1ATI4|B1ATI4_MOUS	3	2	2	2	0	0	0	1	1	1	0	0	0	1	1	2	0	0	0	1	1	1	0	0	0	1	1	2	0	0	0	1	1	1	0	0	0	1	1	2	12.9	12.9	12.9	26.947	249
A5GZX3;Q9CPU0	A5GZX3;Q9CPU0	Lactoylglutathione lyase	Glo1	>tr|A5GZX3|A5GZX3_MOUSE Glyoxalase 1 OS=Mus musculus GN=Glo1 PE=2 SV=1;>sp|Q9CPU0|LGUL_MOUSE Lactoylglutathione lyase OS=Mus musculus GN=Glo1 PE=1 SV=3	2	10	10	10	8	8	8	4	2	4	9	9	8	6	5	4	8	8	8	4	2	4	9	9	8	6	5	4	8	8	8	4	2	4	9	9	8	6	5	4	72.3	72.3	72.3	20.809	184
A6H584;E9Q1B5;Q8C6K9;Q8C6K9-2;E9Q6A6	A6H584;E9Q1B5	Collagen alpha-5(VI) chain	Col6a5	>sp|A6H584|CO6A5_MOUSE Collagen alpha-5(VI) chain OS=Mus musculus GN=Col6a5 PE=1 SV=2;>tr|E9Q1B5|E9Q1B5_MOUSE Collagen alpha-5(VI) chain OS=Mus musculus GN=Col6a5 PE=4 SV=1	5	3	3	3	0	0	2	0	1	0	2	0	1	0	0	0	0	0	2	0	1	0	2	0	1	0	0	0	0	0	2	0	1	0	2	0	1	0	0	0	1.4	1.4	1.4	289.61	2640
A6H5X4;A6H5X4-3;A6H5X4-2;D3YZK6	A6H5X4;A6H5X4-3;A6H5X4-2;D3YZK6	PHD finger protein 11	Phf11;D14Ertd668e	>sp|A6H5X4|PHF11_MOUSE PHD finger protein 11 OS=Mus musculus GN=Phf11 PE=2 SV=1;>sp|A6H5X4-3|PHF11_MOUSE Isoform 3 of PHD finger protein 11 OS=Mus musculus GN=Phf11;>sp|A6H5X4-2|PHF11_MOUSE Isoform 2 of PHD finger protein 11 OS=Mus musculus GN=Phf11;>tr|D3	4	1	1	1	0	1	1	0	0	0	1	1	1	0	0	0	0	1	1	0	0	0	1	1	1	0	0	0	0	1	1	0	0	0	1	1	1	0	0	0	6.8	6.8	6.8	37.728	337
A6H5Z3;A6H5Z3-2;Q8C1X1;F6Q3Q9;E0CXR2;E9Q1K9;E0CY34	A6H5Z3;A6H5Z3-2	Exocyst complex component 6B	Exoc6b	>sp|A6H5Z3|EXC6B_MOUSE Exocyst complex component 6B OS=Mus musculus GN=Exoc6b PE=2 SV=1;>sp|A6H5Z3-2|EXC6B_MOUSE Isoform 2 of Exocyst complex component 6B OS=Mus musculus GN=Exoc6b	7	6	6	6	3	3	4	1	0	1	5	3	4	1	1	2	3	3	4	1	0	1	5	3	4	1	1	2	3	3	4	1	0	1	5	3	4	1	1	2	10.6	10.6	10.6	94.128	810
A6H611;E9Q785	A6H611;E9Q785	Mitochondrial intermediate peptidase	Mipep	>sp|A6H611|MIPEP_MOUSE Mitochondrial intermediate peptidase OS=Mus musculus GN=Mipep PE=2 SV=1;>tr|E9Q785|E9Q785_MOUSE Mitochondrial intermediate peptidase OS=Mus musculus GN=Mipep PE=3 SV=1	2	1	1	1	1	1	1	1	1	1	1	1	1	1	0	0	1	1	1	1	1	1	1	1	1	1	0	0	1	1	1	1	1	1	1	1	1	1	0	0	1.5	1.5	1.5	80.851	711
A6H618;Q8CBG9;Q8CBG9-2;Q8CBG9-3;E9PUJ5;Q8CBG9-4;Q8CBG9-5;D3Z0A0;F6UDR6;D3YYB6	A6H618;Q8CBG9;Q8CBG9-2	RING finger protein 170	Rnf170	>tr|A6H618|A6H618_MOUSE MCG117388, isoform CRA_a OS=Mus musculus GN=Rnf170 PE=2 SV=1;>sp|Q8CBG9|RN170_MOUSE RING finger protein 170 OS=Mus musculus GN=Rnf170 PE=2 SV=1;>sp|Q8CBG9-2|RN170_MOUSE Isoform 2 of RING finger protein 170 OS=Mus musculus GN=Rnf170	10	5	5	5	4	3	3	3	4	2	4	4	3	4	5	4	4	3	3	3	4	2	4	4	3	4	5	4	4	3	3	3	4	2	4	4	3	4	5	4	21.7	21.7	21.7	33.413	286
A6H619;A6H619-2;F7ANA1;F6WXS6;D6RI35;D3YWH5	A6H619;A6H619-2;F7ANA1;F6WXS6	PHD and RING finger domain-containing protein 1	Phrf1	>sp|A6H619|PHRF1_MOUSE PHD and RING finger domain-containing protein 1 OS=Mus musculus GN=Phrf1 PE=1 SV=2;>sp|A6H619-2|PHRF1_MOUSE Isoform 2 of PHD and RING finger domain-containing protein 1 OS=Mus musculus GN=Phrf1;>tr|F7ANA1|F7ANA1_MOUSE PHD and RING fi	6	6	6	6	4	2	4	1	1	1	3	4	5	0	0	0	4	2	4	1	1	1	3	4	5	0	0	0	4	2	4	1	1	1	3	4	5	0	0	0	4	4	4	184.08	1682
A6H630;A6H630-2;A6H630-4;A6H630-3	A6H630;A6H630-2;A6H630-4;A6H630-3	UPF0364 protein C6orf211 homolog		>sp|A6H630|CF211_MOUSE UPF0364 protein C6orf211 homolog OS=Mus musculus PE=2 SV=1;>sp|A6H630-2|CF211_MOUSE Isoform 2 of UPF0364 protein C6orf211 homolog OS=Mus musculus;>sp|A6H630-4|CF211_MOUSE Isoform 4 of UPF0364 protein C6orf211 homolog OS=Mus musculus;	4	2	2	2	0	0	1	0	1	0	1	0	1	0	0	1	0	0	1	0	1	0	1	0	1	0	0	1	0	0	1	0	1	0	1	0	1	0	0	1	6.6	6.6	6.6	50.548	439
A6H659;Q3U1F9	A6H659;Q3U1F9	Phosphoprotein associated with glycosphingolipid-enriched microdomains 1	Pag1	>tr|A6H659|A6H659_MOUSE Pag1 protein OS=Mus musculus GN=Pag1 PE=2 SV=1;>sp|Q3U1F9|PHAG1_MOUSE Phosphoprotein associated with glycosphingolipid-enriched microdomains 1 OS=Mus musculus GN=Pag1 PE=1 SV=2	2	6	6	6	2	2	3	3	3	6	2	2	2	1	1	3	2	2	3	3	3	6	2	2	2	1	1	3	2	2	3	3	3	6	2	2	2	1	1	3	23.1	23.1	23.1	46.549	429
A6H6A9;A6H6A9-2	A6H6A9;A6H6A9-2	Rab GTPase-activating protein 1-like	Rabgap1l	>sp|A6H6A9|RBG1L_MOUSE Rab GTPase-activating protein 1-like OS=Mus musculus GN=Rabgap1l PE=1 SV=1;>sp|A6H6A9-2|RBG1L_MOUSE Isoform 2 of Rab GTPase-activating protein 1-like OS=Mus musculus GN=Rabgap1l	2	11	10	8	7	6	8	4	3	4	9	10	9	8	7	4	6	5	7	4	3	3	8	9	8	8	6	4	4	4	5	4	3	3	6	7	6	6	5	4	16.9	16	11.9	92.403	815
A6H6A9-3;A6H6A9-4	A6H6A9-3			>sp|A6H6A9-3|RBG1L_MOUSE Isoform 3 of Rab GTPase-activating protein 1-like OS=Mus musculus GN=Rabgap1l	2	8	4	4	5	5	6	2	3	3	7	7	7	2	3	4	1	2	2	2	2	2	3	3	3	0	1	3	1	2	2	2	2	2	3	3	3	0	1	3	30	18.9	18.9	42.753	370
A6H6E2	A6H6E2	Multimerin-2	Mmrn2	>sp|A6H6E2|MMRN2_MOUSE Multimerin-2 OS=Mus musculus GN=Mmrn2 PE=2 SV=1	1	1	1	1	0	0	1	0	0	0	1	1	1	0	0	0	0	0	1	0	0	0	1	1	1	0	0	0	0	0	1	0	0	0	1	1	1	0	0	0	1.6	1.6	1.6	105.21	943
A6H6H4;Q6ZWY8	A6H6H4;Q6ZWY8	Thymosin beta-10	Tmsb10	>tr|A6H6H4|A6H6H4_MOUSE MCG125727 OS=Mus musculus GN=Tmsb10 PE=4 SV=1;>sp|Q6ZWY8|TYB10_MOUSE Thymosin beta-10 OS=Mus musculus GN=Tmsb10 PE=2 SV=3	2	1	1	1	0	1	1	0	0	0	1	1	1	0	0	0	0	1	1	0	0	0	1	1	1	0	0	0	0	1	1	0	0	0	1	1	1	0	0	0	31.8	31.8	31.8	5.0256	44
A6H6M1;P22646	A6H6M1;P22646	T-cell surface glycoprotein CD3 epsilon chain	Cd3e	>tr|A6H6M1|A6H6M1_MOUSE CD3 antigen epsilon polypeptide OS=Mus musculus GN=Cd3e PE=2 SV=1;>sp|P22646|CD3E_MOUSE T-cell surface glycoprotein CD3 epsilon chain OS=Mus musculus GN=Cd3e PE=1 SV=2	2	2	2	2	0	1	1	2	2	2	0	0	0	1	1	1	0	1	1	2	2	2	0	0	0	1	1	1	0	1	1	2	2	2	0	0	0	1	1	1	19.6	19.6	19.6	21.393	189
A6H6M8;Q810U5;Q3TNK7;Q810U5-2;Q810U5-3;F6UK66	A6H6M8;Q810U5;Q3TNK7;Q810U5-2;Q810U5-3;F6UK66	Coiled-coil domain-containing protein 50	Ccdc50	>tr|A6H6M8|A6H6M8_MOUSE Coiled-coil domain containing 50 OS=Mus musculus GN=Ccdc50 PE=2 SV=1;>sp|Q810U5|CCD50_MOUSE Coiled-coil domain-containing protein 50 OS=Mus musculus GN=Ccdc50 PE=1 SV=1;>tr|Q3TNK7|Q3TNK7_MOUSE Coiled-coil domain containing 50 OS=Mus	6	1	1	1	1	1	1	0	0	0	1	1	1	0	0	1	1	1	1	0	0	0	1	1	1	0	0	1	1	1	1	0	0	0	1	1	1	0	0	1	5.2	5.2	5.2	35.321	305
A6H6S8;Q8CI61	A6H6S8;Q8CI61	BAG family molecular chaperone regulator 4	Bag4	>tr|A6H6S8|A6H6S8_MOUSE BCL2-associated athanogene 4 OS=Mus musculus GN=Bag4 PE=2 SV=1;>sp|Q8CI61|BAG4_MOUSE BAG family molecular chaperone regulator 4 OS=Mus musculus GN=Bag4 PE=1 SV=2	2	1	1	1	1	1	1	0	0	0	1	1	1	0	0	1	1	1	1	0	0	0	1	1	1	0	0	1	1	1	1	0	0	0	1	1	1	0	0	1	4.6	4.6	4.6	49.094	457
A6MDD2;Q60673	A6MDD2;Q60673	Receptor-type tyrosine-protein phosphatase-like N	Ptprn	>tr|A6MDD2|A6MDD2_MOUSE Protein tyrosine phosphatase receptor type N (Precursor) OS=Mus musculus GN=Ptprn PE=2 SV=1;>sp|Q60673|PTPRN_MOUSE Receptor-type tyrosine-protein phosphatase-like N OS=Mus musculus GN=Ptprn PE=2 SV=2	2	2	2	2	1	1	0	1	1	1	1	1	1	2	1	1	1	1	0	1	1	1	1	1	1	2	1	1	1	1	0	1	1	1	1	1	1	2	1	1	3.6	3.6	3.6	106.02	981
A6PWS1;Q9QZ06;Q8C5G6;A9JEI5;A6PWR9;F7AT44	A6PWS1;Q9QZ06;Q8C5G6	Toll-interacting protein	Tollip	>tr|A6PWS1|A6PWS1_MOUSE Toll interacting protein OS=Mus musculus GN=Tollip PE=4 SV=1;>sp|Q9QZ06|TOLIP_MOUSE Toll-interacting protein OS=Mus musculus GN=Tollip PE=1 SV=1;>tr|Q8C5G6|Q8C5G6_MOUSE Toll interacting protein OS=Mus musculus GN=Tollip PE=2 SV=1	6	5	5	5	2	1	4	3	2	0	5	4	3	2	2	4	2	1	4	3	2	0	5	4	3	2	2	4	2	1	4	3	2	0	5	4	3	2	2	4	23	23	23	30.345	274
A6X8Z7;Q9JJ04;E9Q8E1;F2Z3X1;A6X8Z8	A6X8Z7;Q9JJ04;E9Q8E1;F2Z3X1	Beta-1,4-galactosyltransferase 4;N-acetyllactosamine synthase;Lactotriaosylceramide beta-1,4-galactosyltransferase	B4galt4	>tr|A6X8Z7|A6X8Z7_MOUSE UDP-Gal:betaGlcNAc beta 1,4-galactosyltransferase, polypeptide 4 OS=Mus musculus GN=B4galt4 PE=4 SV=1;>sp|Q9JJ04|B4GT4_MOUSE Beta-1,4-galactosyltransferase 4 OS=Mus musculus GN=B4galt4 PE=2 SV=1;>tr|E9Q8E1|E9Q8E1_MOUSE Lactotriaosyl	5	7	7	7	1	3	3	4	1	3	2	2	3	3	6	6	1	3	3	4	1	3	2	2	3	3	6	6	1	3	3	4	1	3	2	2	3	3	6	6	23.3	23.3	23.3	39.699	344
A6X915;Q80XP8;A2ADS3;Q922G2;Q922G2-2;D6RG49;A2ADS1;Q80XP8-2	A6X915;Q80XP8;A2ADS3;Q922G2;Q922G2-2;D6RG49;A2ADS1;Q80XP8-2	Protein FAM76B;Protein FAM76A	Fam76b;Fam76a	>tr|A6X915|A6X915_MOUSE Novel protein (2810485I05Rik) OS=Mus musculus GN=Fam76b PE=4 SV=1;>sp|Q80XP8|FA76B_MOUSE Protein FAM76B OS=Mus musculus GN=Fam76b PE=2 SV=1;>tr|A2ADS3|A2ADS3_MOUSE Novel protein (BC008163) OS=Mus musculus GN=Fam76a PE=4 SV=1;>sp|Q92	8	2	2	2	1	1	1	0	0	0	2	1	1	0	0	0	1	1	1	0	0	0	2	1	1	0	0	0	1	1	1	0	0	0	2	1	1	0	0	0	7.1	7.1	7.1	38.555	339
A6X919	A6X919	Protein dpy-19 homolog 1	Dpy19l1	>sp|A6X919|D19L1_MOUSE Protein dpy-19 homolog 1 OS=Mus musculus GN=Dpy19l1 PE=2 SV=1	1	5	5	4	4	3	2	2	3	2	3	3	4	2	1	3	4	3	2	2	3	2	3	3	4	2	1	3	3	3	1	2	3	2	3	2	3	1	1	2	7.2	7.2	6.2	84.186	746
A6X951;Q8VIB3	A6X951;Q8VIB3	Type 2 lactosamine alpha-2,3-sialyltransferase	St3gal6	>tr|A6X951|A6X951_MOUSE ST3 beta-galactoside alpha-2,3-sialyltransferase 6 OS=Mus musculus GN=St3gal6 PE=4 SV=1;>sp|Q8VIB3|SIA10_MOUSE Type 2 lactosamine alpha-2,3-sialyltransferase OS=Mus musculus GN=St3gal6 PE=2 SV=3	2	12	12	12	6	7	5	10	10	7	7	7	8	10	11	11	6	7	5	10	10	7	7	7	8	10	11	11	6	7	5	10	10	7	7	7	8	10	11	11	41.9	41.9	41.9	37.854	329
A6X962;O35075	A6X962;O35075	Down syndrome critical region protein 3 homolog	Dscr3	>tr|A6X962|A6X962_MOUSE Down syndrome critical region gene 3 OS=Mus musculus GN=Dscr3 PE=4 SV=1;>sp|O35075|DSCR3_MOUSE Down syndrome critical region protein 3 homolog OS=Mus musculus GN=Dscr3 PE=2 SV=1	2	9	9	9	7	5	8	3	5	4	7	7	8	7	6	6	7	5	8	3	5	4	7	7	8	7	6	6	7	5	8	3	5	4	7	7	8	7	6	6	45.1	45.1	45.1	32.97	297
A6X966;Q8BHG9	A6X966;Q8BHG9	CGG triplet repeat-binding protein 1	Cggbp1	>tr|A6X966|A6X966_MOUSE CGG triplet repeat binding protein 1 OS=Mus musculus GN=Cggbp1 PE=4 SV=1;>sp|Q8BHG9|CGBP1_MOUSE CGG triplet repeat-binding protein 1 OS=Mus musculus GN=Cggbp1 PE=2 SV=1	2	3	3	3	3	3	3	0	0	0	2	2	2	1	0	1	3	3	3	0	0	0	2	2	2	1	0	1	3	3	3	0	0	0	2	2	2	1	0	1	34.7	34.7	34.7	18.761	167
A6ZI44;P05064;Q5FWB7;D3YWI1;Q9CPQ9;D3YV98;D3Z510;A6ZI47;B1AQE0;P05063	A6ZI44;P05064;Q5FWB7;D3YWI1;Q9CPQ9;D3YV98	Fructose-bisphosphate aldolase;Fructose-bisphosphate aldolase A	Aldoa;Aldoart1	>tr|A6ZI44|A6ZI44_MOUSE Fructose-bisphosphate aldolase OS=Mus musculus GN=Aldoa PE=2 SV=1;>sp|P05064|ALDOA_MOUSE Fructose-bisphosphate aldolase A OS=Mus musculus GN=Aldoa PE=1 SV=2;>tr|Q5FWB7|Q5FWB7_MOUSE Fructose-bisphosphate aldolase OS=Mus musculus GN=A	10	20	19	19	13	17	18	17	15	14	16	16	17	16	18	16	12	16	17	16	14	13	15	15	16	15	17	15	12	16	17	16	14	13	15	15	16	15	17	15	60	58.4	58.4	45.12	418
A7TU71;A2ALU4;A2ALU4-2	A7TU71;A2ALU4;A2ALU4-2	Protein Shroom2	Shroom2	>tr|A7TU71|A7TU71_MOUSE Protein Shroom2 OS=Mus musculus GN=Shroom2 PE=2 SV=1;>sp|A2ALU4|SHRM2_MOUSE Protein Shroom2 OS=Mus musculus GN=Shroom2 PE=1 SV=1;>sp|A2ALU4-2|SHRM2_MOUSE Isoform 2 of Protein Shroom2 OS=Mus musculus GN=Shroom2	3	1	1	1	1	1	1	0	0	0	0	0	0	0	0	0	1	1	1	0	0	0	0	0	0	0	0	0	1	1	1	0	0	0	0	0	0	0	0	0	1.1	1.1	1.1	165.26	1487
A7UAK5;A7UAK8;A2AUP4;A2AUP5;Q7TS91;A2AUP1;A2AUP3;A7UAK4	A7UAK5;A7UAK8;A2AUP4;A2AUP5;Q7TS91;A2AUP1;A2AUP3;A7UAK4		Pfkfb3	>tr|A7UAK5|A7UAK5_MOUSE 6-phosphofructo-2-kinase/fructose-2, 6-biphosphatase 3 splice variant 2 OS=Mus musculus GN=Pfkfb3 PE=2 SV=1;>tr|A7UAK8|A7UAK8_MOUSE 6-phosphofructo-2-kinase/fructose-2, 6-biphosphatase 3 splice variant 5 OS=Mus musculus GN=Pfkfb3 PE	8	4	2	2	2	3	3	1	1	1	3	3	4	2	2	1	1	2	1	0	0	0	2	2	2	1	1	0	1	2	1	0	0	0	2	2	2	1	1	0	7.2	3.8	3.8	63.652	555
A7VJA4;Q9ERL7	A7VJA4;Q9ERL7	Glia maturation factor gamma	Gmfg	>tr|A7VJA4|A7VJA4_MOUSE Glia maturation factor gamma OS=Mus musculus GN=Gmfg PE=2 SV=1;>sp|Q9ERL7|GMFG_MOUSE Glia maturation factor gamma OS=Mus musculus GN=Gmfg PE=1 SV=1	2	3	3	1	2	2	2	0	0	0	1	1	0	0	0	1	2	2	2	0	0	0	1	1	0	0	0	1	1	0	0	0	0	0	0	0	0	0	0	0	28.9	28.9	9.9	16.748	142
A7VMS2;E9Q2R9;Q31615;Q9BCZ1;E9QAQ6;Q6W9L1;Q6W9J6;A2AVX9;O19443;Q85ZW8;Q85ZW5;Q85ZW6;Q85ZW7;Q85ZW9;G3UWS8;E9Q8P2;F6VXI7	A7VMS2		Gm11127	>tr|A7VMS2|A7VMS2_MOUSE MHC classIb T15 OS=Mus musculus GN=Gm11127 PE=2 SV=2	17	13	11	5	9	8	10	11	9	10	7	6	8	10	11	11	7	6	8	9	7	8	6	4	7	9	9	9	2	2	3	3	3	3	2	1	3	4	4	5	38.8	33.7	12	41.894	374
A7VMV2;Q99KP3;Q9D221	A7VMV2;Q99KP3	Lambda-crystallin homolog	Cryl1	>tr|A7VMV2|A7VMV2_MOUSE Crystallin, lamda 1, isoform CRA_a OS=Mus musculus GN=Cryl1 PE=2 SV=1;>sp|Q99KP3|CRYL1_MOUSE Lambda-crystallin homolog OS=Mus musculus GN=Cryl1 PE=2 SV=3	3	14	14	14	7	9	12	7	6	8	10	11	9	8	9	11	7	9	12	7	6	8	10	11	9	8	9	11	7	9	12	7	6	8	10	11	9	8	9	11	66.1	66.1	66.1	35.208	319
A8DIL0;Q542M5;Q9JL15;Q8C6H0	A8DIL0;Q542M5;Q9JL15;Q8C6H0	Galectin-8	Lgals8	>tr|A8DIL0|A8DIL0_MOUSE Galectin-8 OS=Mus musculus GN=Lgals8 PE=2 SV=1;>tr|Q542M5|Q542M5_MOUSE Lectin, galactose binding, soluble 8, isoform CRA_a OS=Mus musculus GN=Lgals8 PE=2 SV=1;>sp|Q9JL15|LEG8_MOUSE Galectin-8 OS=Mus musculus GN=Lgals8 PE=2 SV=1;>tr|	4	11	11	11	3	4	5	7	6	7	5	5	6	7	6	8	3	4	5	7	6	7	5	5	6	7	6	8	3	4	5	7	6	7	5	5	6	7	6	8	41.2	41.2	41.2	37.009	325
A8DUK4;P02088;E9Q223;P02089;CON__Q3SX09;P02104;CON__P02070	A8DUK4;P02088;E9Q223	Hemoglobin subunit beta-1	Hbb-b1	>tr|A8DUK4|A8DUK4_MOUSE Beta-globin OS=Mus musculus GN=Hbb-b1 PE=3 SV=1;>sp|P02088|HBB1_MOUSE Hemoglobin subunit beta-1 OS=Mus musculus GN=Hbb-b1 PE=1 SV=2;>tr|E9Q223|E9Q223_MOUSE Protein Beta-s (Fragment) OS=Mus musculus GN=Beta-s PE=3 SV=1	7	13	13	13	10	10	12	10	8	10	12	11	13	9	11	10	10	10	12	10	8	10	12	11	13	9	11	10	10	10	12	10	8	10	12	11	13	9	11	10	93.9	93.9	93.9	15.748	147
A8E0Y8	A8E0Y8	Immunoglobulin superfamily member 2	Cd101	>sp|A8E0Y8|IGSF2_MOUSE Immunoglobulin superfamily member 2 OS=Mus musculus GN=Cd101 PE=2 SV=1	1	5	5	5	0	0	0	5	2	4	0	0	0	3	2	2	0	0	0	5	2	4	0	0	0	3	2	2	0	0	0	5	2	4	0	0	0	3	2	2	5.7	5.7	5.7	114.2	1033
A8IP69;P61982	A8IP69;P61982	14-3-3 protein gamma;14-3-3 protein gamma, N-terminally processed	Ywhag	>tr|A8IP69|A8IP69_MOUSE 14-3-3 protein gamma subtype OS=Mus musculus GN=Ywhag PE=2 SV=1;>sp|P61982|1433G_MOUSE 14-3-3 protein gamma OS=Mus musculus GN=Ywhag PE=1 SV=2	2	17	12	12	14	15	14	10	9	11	14	14	13	14	13	15	9	10	9	6	5	7	9	9	8	9	8	10	9	10	9	6	5	7	9	9	8	9	8	10	66.4	50.6	50.6	28.302	247
A8W660;Q3UX61	A8W660;Q3UX61	N-alpha-acetyltransferase 11	Naa11	>tr|A8W660|A8W660_MOUSE ARD1 homolog B (S. cerevisiae) OS=Mus musculus GN=Naa11 PE=2 SV=1;>sp|Q3UX61|NAA11_MOUSE N-alpha-acetyltransferase 11 OS=Mus musculus GN=Naa11 PE=2 SV=1	2	5	1	1	4	4	4	3	3	3	4	4	5	2	3	3	0	0	0	0	0	0	0	0	1	0	0	0	0	0	0	0	0	0	0	0	1	0	0	0	34.4	12.8	12.8	24.67	218
A8Y5G1;Q9D1N9;A8Y5G2;Q9D1N9-2	A8Y5G1;Q9D1N9;A8Y5G2;Q9D1N9-2	39S ribosomal protein L21, mitochondrial	Mrpl21	>tr|A8Y5G1|A8Y5G1_MOUSE MCG3895, isoform CRA_a OS=Mus musculus GN=Mrpl21 PE=4 SV=1;>sp|Q9D1N9|RM21_MOUSE 39S ribosomal protein L21, mitochondrial OS=Mus musculus GN=Mrpl21 PE=2 SV=1;>tr|A8Y5G2|A8Y5G2_MOUSE MCG3895, isoform CRA_b OS=Mus musculus GN=Mrpl21 P	4	4	4	4	1	1	2	0	1	1	3	3	3	1	3	1	1	1	2	0	1	1	3	3	3	1	3	1	1	1	2	0	1	1	3	3	3	1	3	1	23.9	23.9	23.9	23.366	209
A8Y5L3;P63154;E9PZS1;E9QA42	A8Y5L3;P63154;E9PZS1;E9QA42	Crooked neck-like protein 1	Crnkl1;Gm4782;Gm8038	>tr|A8Y5L3|A8Y5L3_MOUSE Crn, crooked neck-like 1 (Drosophila) OS=Mus musculus GN=Crnkl1 PE=4 SV=1;>sp|P63154|CRNL1_MOUSE Crooked neck-like protein 1 OS=Mus musculus GN=Crnkl1 PE=2 SV=1;>tr|E9PZS1|E9PZS1_MOUSE Uncharacterized protein OS=Mus musculus GN=Gm47	4	12	12	12	5	6	6	4	4	4	8	9	9	3	6	4	5	6	6	4	4	4	8	9	9	3	6	4	5	6	6	4	4	4	8	9	9	3	6	4	18.4	18.4	18.4	83.415	690
A8Y5N3;Q9EQ06;A8Y5N2;Q9EQ06-2	A8Y5N3;Q9EQ06;A8Y5N2;Q9EQ06-2	Estradiol 17-beta-dehydrogenase 11	Hsd17b11	>tr|A8Y5N3|A8Y5N3_MOUSE Dehydrogenase/reductase (SDR family) member 8, isoform CRA_b OS=Mus musculus GN=Hsd17b11 PE=3 SV=1;>sp|Q9EQ06|DHB11_MOUSE Estradiol 17-beta-dehydrogenase 11 OS=Mus musculus GN=Hsd17b11 PE=2 SV=1;>tr|A8Y5N2|A8Y5N2_MOUSE Dehydrogenase	4	19	16	16	15	14	15	18	12	16	17	17	17	19	18	19	12	11	12	15	10	13	14	14	14	16	15	16	12	11	12	15	10	13	14	14	14	16	15	16	69.5	66.8	66.8	32.88	298
A8Y5N5;Q8VCR2-2;A8Y5N4;A8Y5N6;Q8VCR2	A8Y5N5;Q8VCR2-2;A8Y5N4;A8Y5N6;Q8VCR2	17-beta-hydroxysteroid dehydrogenase 13	Hsd17b13	>tr|A8Y5N5|A8Y5N5_MOUSE 17-beta-hydroxysteroid dehydrogenase 13 OS=Mus musculus GN=Hsd17b13 PE=3 SV=1;>sp|Q8VCR2-2|DHB13_MOUSE Isoform 2 of 17-beta-hydroxysteroid dehydrogenase 13 OS=Mus musculus GN=Hsd17b13;>tr|A8Y5N4|A8Y5N4_MOUSE 17-beta-hydroxysteroid d	5	22	22	19	8	14	13	11	9	11	20	16	16	21	18	18	8	14	13	11	9	11	20	16	16	21	18	18	5	11	10	8	7	8	17	13	13	18	15	15	64	64	64	33.415	300
A8Y5T6;Q8CFI5;A2AVQ7	A8Y5T6;Q8CFI5	Probable proline--tRNA ligase, mitochondrial	Pars2	>tr|A8Y5T6|A8Y5T6_MOUSE Probable proline--tRNA ligase, mitochondrial OS=Mus musculus GN=Pars2 PE=3 SV=1;>sp|Q8CFI5|SYPM_MOUSE Probable proline--tRNA ligase, mitochondrial OS=Mus musculus GN=Pars2 PE=2 SV=2	3	8	8	8	4	2	4	2	2	2	3	3	3	4	4	3	4	2	4	2	2	2	3	3	3	4	4	3	4	2	4	2	2	2	3	3	3	4	4	3	21.1	21.1	21.1	57.735	511
A9C429;Q3TFQ1;Q3UBW1	A9C429;Q3TFQ1;Q3UBW1	SPRY domain-containing protein 7	6330409N04Rik;Spryd7	>tr|A9C429|A9C429_MOUSE MCG4284 OS=Mus musculus GN=6330409N04Rik PE=4 SV=1;>sp|Q3TFQ1|SPRY7_MOUSE SPRY domain-containing protein 7 OS=Mus musculus GN=Spryd7 PE=2 SV=2;>tr|Q3UBW1|Q3UBW1_MOUSE Novel protein (6330409N04Rik) OS=Mus musculus GN=6330409N04Rik PE	3	12	12	12	5	6	5	9	7	8	7	6	9	9	12	12	5	6	5	9	7	8	7	6	9	9	12	12	5	6	5	9	7	8	7	6	9	9	12	12	59.2	59.2	59.2	21.681	196
A9C475;Q61214;A1L341;F6ZS07;Q9Z188-3;Q9Z188;Q9Z188-2;A9C478;A9C477	A9C475;Q61214;A1L341;F6ZS07	Dual specificity tyrosine-phosphorylation-regulated kinase 1A	Dyrk1a	>tr|A9C475|A9C475_MOUSE Dual-specificity tyrosine-(Y)-phosphorylation regulated kinase 1a OS=Mus musculus GN=Dyrk1a PE=2 SV=1;>sp|Q61214|DYR1A_MOUSE Dual specificity tyrosine-phosphorylation-regulated kinase 1A OS=Mus musculus GN=Dyrk1a PE=1 SV=1;>tr|A1L34	9	5	5	5	3	2	2	0	0	0	2	2	3	0	0	0	3	2	2	0	0	0	2	2	3	0	0	0	3	2	2	0	0	0	2	2	3	0	0	0	10.1	10.1	10.1	85.493	763
A9C490;Q99LC9	A9C490;Q99LC9	Peroxisome assembly factor 2	Pex6	>tr|A9C490|A9C490_MOUSE Peroxisomal biogenesis factor 6 OS=Mus musculus GN=Pex6 PE=3 SV=1;>sp|Q99LC9|PEX6_MOUSE Peroxisome assembly factor 2 OS=Mus musculus GN=Pex6 PE=2 SV=1	2	15	15	15	8	9	8	8	6	5	11	11	12	11	10	9	8	9	8	8	6	5	11	11	12	11	10	9	8	9	8	8	6	5	11	11	12	11	10	9	21.3	21.3	21.3	104.55	981
A9CLV6;Q9QZI8;E9PY81;E9Q553	A9CLV6;Q9QZI8;E9PY81;E9Q553	Serine incorporator 1	Serinc1	>tr|A9CLV6|A9CLV6_MOUSE Axotomy induced glycoprotein 2 OS=Mus musculus GN=Serinc1 PE=2 SV=1;>sp|Q9QZI8|SERC1_MOUSE Serine incorporator 1 OS=Mus musculus GN=Serinc1 PE=1 SV=1;>tr|E9PY81|E9PY81_MOUSE Serine incorporator 1 (Fragment) OS=Mus musculus GN=Serinc	4	4	4	4	2	1	2	4	4	4	3	2	2	3	4	3	2	1	2	4	4	4	3	2	2	3	4	3	2	1	2	4	4	4	3	2	2	3	4	3	11.3	11.3	11.3	50.508	453
A9JSM3;E9Q1R9	A9JSM3	Transmembrane protein 238	Tmem238	>sp|A9JSM3|TM238_MOUSE Transmembrane protein 238 OS=Mus musculus GN=Tmem238 PE=2 SV=1	2	4	4	4	3	3	3	4	4	3	3	3	3	4	4	4	3	3	3	4	4	3	3	3	3	4	4	4	3	3	3	4	4	3	3	3	3	4	4	4	40.3	40.3	40.3	18.226	176
B0LM42;B7ZN14;Q8C7Q4;Q8VE92	B0LM42		Rbm14/Rbm4 fusion	>tr|B0LM42|B0LM42_MOUSE RNA-binding protein 14 OS=Mus musculus GN=Rbm14/Rbm4 fusion PE=2 SV=1	4	6	2	2	5	4	6	1	1	2	3	3	4	1	2	0	1	1	2	0	0	0	1	1	2	0	0	0	1	1	2	0	0	0	1	1	2	0	0	0	24.7	11	11	36.782	336
B0QZN5;P63044;Q8CHR4;F6Q6A5;D3YTU0;Q62442;Q62442-2	B0QZN5;P63044;Q8CHR4;F6Q6A5	Vesicle-associated membrane protein 2	Vamp2	>tr|B0QZN5|B0QZN5_MOUSE Vesicle-associated membrane 2 OS=Mus musculus GN=Vamp2 PE=4 SV=1;>sp|P63044|VAMP2_MOUSE Vesicle-associated membrane protein 2 OS=Mus musculus GN=Vamp2 PE=1 SV=2;>tr|Q8CHR4|Q8CHR4_MOUSE Vesicle-associated membrane 2 OS=Mus musculus G	7	6	2	2	3	3	4	4	4	5	3	2	4	2	2	2	0	0	1	1	1	2	0	0	1	0	0	0	0	0	1	1	1	2	0	0	1	0	0	0	46.6	27.6	27.6	17.862	163
B0R0C8;Q8BHD8;F6SPX7;B0R0C7	B0R0C8;Q8BHD8	Protein-L-isoaspartate O-methyltransferase domain-containing protein 2	Pcmtd2	>tr|B0R0C8|B0R0C8_MOUSE Protein-L-isoaspartate (D-aspartate) O-methyltransferase domain containing 2 OS=Mus musculus GN=Pcmtd2 PE=4 SV=1;>sp|Q8BHD8|PCMD2_MOUSE Protein-L-isoaspartate O-methyltransferase domain-containing protein 2 OS=Mus musculus GN=Pcmtd2	4	7	7	7	5	3	4	1	2	2	4	5	4	1	1	1	5	3	4	1	2	2	4	5	4	1	1	1	5	3	4	1	2	2	4	5	4	1	1	1	24	24	24	40.755	359
B0V2H6;Q03146;Q03146-2;Q544T2;E9PVQ6;G3UXE5;Q62371	B0V2H6;Q03146;Q03146-2;Q544T2	Epithelial discoidin domain-containing receptor 1	Ddr1	>tr|B0V2H6|B0V2H6_MOUSE Discoidin domain receptor family, member 1 OS=Mus musculus GN=Ddr1 PE=4 SV=1;>sp|Q03146|DDR1_MOUSE Epithelial discoidin domain-containing receptor 1 OS=Mus musculus GN=Ddr1 PE=2 SV=2;>sp|Q03146-2|DDR1_MOUSE Isoform 2 of Epithelial d	7	16	16	16	10	11	8	14	11	10	8	6	7	13	12	14	10	11	8	14	11	10	8	6	7	13	12	14	10	11	8	14	11	10	8	6	7	13	12	14	24.1	24.1	24.1	101.16	911
B0V2N7	B0V2N7	Annexin	Anxa2	>tr|B0V2N7|B0V2N7_MOUSE Annexin (Fragment) OS=Mus musculus GN=Anxa2 PE=3 SV=1	1	22	1	1	19	16	19	18	14	18	20	18	20	20	19	19	0	0	0	0	0	0	1	0	0	0	0	0	0	0	0	0	0	0	1	0	0	0	0	0	91.8	10.2	10.2	21.856	196
B0V2Q7;Q3UN02;B0V2Q9	B0V2Q7;Q3UN02	Lysocardiolipin acyltransferase 1	Lclat1	>tr|B0V2Q7|B0V2Q7_MOUSE Lclat1 protein OS=Mus musculus GN=Lclat1 PE=2 SV=1;>sp|Q3UN02|LCLT1_MOUSE Lysocardiolipin acyltransferase 1 OS=Mus musculus GN=Lclat1 PE=2 SV=2	3	12	12	12	9	9	9	8	5	7	8	9	9	9	10	10	9	9	9	8	5	7	8	9	9	9	10	10	9	9	9	8	5	7	8	9	9	9	10	10	35.1	35.1	35.1	44.399	376
B0V2V2;Q9DAU1;Q9DAU1-2;B0V2V1	B0V2V2;Q9DAU1;Q9DAU1-2	Protein canopy homolog 3	Cnpy3	>tr|B0V2V2|B0V2V2_MOUSE Canopy 3 homolog (Zebrafish) OS=Mus musculus GN=Cnpy3 PE=4 SV=1;>sp|Q9DAU1|CNPY3_MOUSE Protein canopy homolog 3 OS=Mus musculus GN=Cnpy3 PE=1 SV=1;>sp|Q9DAU1-2|CNPY3_MOUSE Isoform 2 of Protein canopy homolog 3 OS=Mus musculus GN=Cnp	4	6	6	6	3	4	4	3	2	1	5	4	5	2	2	1	3	4	4	3	2	1	5	4	5	2	2	1	3	4	4	3	2	1	5	4	5	2	2	1	30.1	30.1	30.1	30.537	276
B0V3P2;B0V3P4;B0V3P3;Q9WV76	B0V3P2;B0V3P4;B0V3P3;Q9WV76	AP-4 complex subunit beta-1	Ap4b1	>tr|B0V3P2|B0V3P2_MOUSE AP-4 complex subunit beta-1 OS=Mus musculus GN=Ap4b1 PE=4 SV=1;>tr|B0V3P4|B0V3P4_MOUSE AP-4 complex subunit beta-1 OS=Mus musculus GN=Ap4b1 PE=4 SV=1;>tr|B0V3P3|B0V3P3_MOUSE AP-4 complex subunit beta-1 OS=Mus musculus GN=Ap4b1 PE=4	4	4	4	4	2	1	2	1	0	0	1	2	2	0	0	1	2	1	2	1	0	0	1	2	2	0	0	1	2	1	2	1	0	0	1	2	2	0	0	1	6.2	6.2	6.2	82.975	738
B0V3P5;Q08ED0;B0V3P6	B0V3P5;Q08ED0;B0V3P6	Bcl-2-like protein 15	Bcl2l15	>tr|B0V3P5|B0V3P5_MOUSE Bcl-2-like protein 15 OS=Mus musculus GN=Bcl2l15 PE=4 SV=1;>sp|Q08ED0|B2L15_MOUSE Bcl-2-like protein 15 OS=Mus musculus GN=Bcl2l15 PE=2 SV=1;>tr|B0V3P6|B0V3P6_MOUSE Bcl-2-like protein 15 OS=Mus musculus GN=Bcl2l15 PE=4 SV=1	3	8	8	8	7	6	8	3	4	4	8	6	8	4	6	6	7	6	8	3	4	4	8	6	8	4	6	6	7	6	8	3	4	4	8	6	8	4	6	6	52.1	52.1	52.1	18.299	167
B1APM8;Q9D0F4	B1APM8;Q9D0F4	NF-kappa-B-activating protein	Nkap	>tr|B1APM8|B1APM8_MOUSE NFKB activating protein OS=Mus musculus GN=Nkap PE=4 SV=1;>sp|Q9D0F4|NKAP_MOUSE NF-kappa-B-activating protein OS=Mus musculus GN=Nkap PE=1 SV=1	2	3	3	3	0	2	1	0	0	1	2	1	1	0	0	0	0	2	1	0	0	1	2	1	1	0	0	0	0	2	1	0	0	1	2	1	1	0	0	0	8.9	8.9	8.9	47.227	415
B1AQ76;CON__P08730-1;P08730;P08730-2	B1AQ76;CON__P08730-1;P08730;P08730-2	Keratin, type I cytoskeletal 13	Krt13	>tr|B1AQ76|B1AQ76_MOUSE Keratin 13 OS=Mus musculus GN=Krt13 PE=3 SV=1;>P08730-1 SWISS-PROT:P08730-1 Tax_Id=10090 Gene_Symbol=Krt13 Isoform 1 of Keratin, type I cytoskeletal 13;>sp|P08730|K1C13_MOUSE Keratin, type I cytoskeletal 13 OS=Mus musculus GN=Krt13	4	16	3	3	12	10	11	11	9	12	12	13	12	13	15	14	2	1	2	2	1	2	3	1	3	3	3	3	2	1	2	2	1	2	3	1	3	3	3	3	29.1	8	8	47.754	437
B1AQ78;CON__P19001;P19001;A1L317;A6BLY7;CON__Q8N1A0	B1AQ78;CON__P19001;P19001	Keratin, type I cytoskeletal 19	Krt19	>tr|B1AQ78|B1AQ78_MOUSE Keratin 19 OS=Mus musculus GN=Krt19 PE=2 SV=1;>P19001 SWISS-PROT:P19001 Tax_Id=10090 Gene_Symbol=Krt19 Keratin, type I cytoskeletal 19;>sp|P19001|K1C19_MOUSE Keratin, type I cytoskeletal 19 OS=Mus musculus GN=Krt19 PE=1 SV=1	6	43	43	28	40	37	40	33	32	33	40	42	42	36	34	37	40	37	40	33	32	33	40	42	42	36	34	37	25	24	25	21	20	22	26	27	27	23	22	23	92.8	92.8	77.4	44.541	403
B1AQE7;Q04690;B1AQE8;Q04690-2;E9QK33;Q04690-3;E9QKP4;Q04690-4;Q5SYH9	B1AQE7;Q04690;B1AQE8;Q04690-2;E9QK33;Q04690-3;E9QKP4;Q04690-4	Neurofibromin	Nf1	>tr|B1AQE7|B1AQE7_MOUSE Neurofibromatosis 1 OS=Mus musculus GN=Nf1 PE=4 SV=1;>sp|Q04690|NF1_MOUSE Neurofibromin OS=Mus musculus GN=Nf1 PE=1 SV=1;>tr|B1AQE8|B1AQE8_MOUSE Neurofibromatosis 1 OS=Mus musculus GN=Nf1 PE=4 SV=1;>sp|Q04690-2|NF1_MOUSE Isoform 1 o	9	4	4	4	0	0	1	2	0	1	1	1	3	1	1	1	0	0	1	2	0	1	1	1	3	1	1	1	0	0	1	2	0	1	1	1	3	1	1	1	1.8	1.8	1.8	319.59	2841
B1AQJ9;Q8VCF1-3;Q8VCF1;Q8VCF1-2	B1AQJ9;Q8VCF1-3;Q8VCF1;Q8VCF1-2	Soluble calcium-activated nucleotidase 1	Cant1	>tr|B1AQJ9|B1AQJ9_MOUSE Calcium activated nucleotidase 1 OS=Mus musculus GN=Cant1 PE=4 SV=1;>sp|Q8VCF1-3|CANT1_MOUSE Isoform 3 of Soluble calcium-activated nucleotidase 1 OS=Mus musculus GN=Cant1;>sp|Q8VCF1|CANT1_MOUSE Soluble calcium-activated nucleotidas	4	13	13	13	5	7	9	11	11	9	7	7	10	11	12	12	5	7	9	11	11	9	7	7	10	11	12	12	5	7	9	11	11	9	7	7	10	11	12	12	42.3	42.3	42.3	49.565	440
B1AQZ0;B1AQY9;B7ZC46;Q8CHH9-2;B1AQY8;Q8CHH9;F7C5C1;E0CYM4	B1AQZ0;B1AQY9;B7ZC46;Q8CHH9-2;B1AQY8;Q8CHH9	Septin-8	2013-09-08	>tr|B1AQZ0|B1AQZ0_MOUSE Septin 8 OS=Mus musculus GN=Sept8 PE=3 SV=1;>tr|B1AQY9|B1AQY9_MOUSE Septin 8 OS=Mus musculus GN=Sept8 PE=3 SV=1;>tr|B7ZC46|B7ZC46_MOUSE Septin 8 OS=Mus musculus GN=Sept8 PE=3 SV=1;>sp|Q8CHH9-2|SEPT8_MOUSE Isoform 2 of Septin-8 OS=Mu	8	13	9	9	11	11	10	4	3	5	9	8	9	4	6	5	8	8	6	2	1	2	6	5	5	1	3	2	8	8	6	2	1	2	6	5	5	1	3	2	36.2	27.3	27.3	55.874	484
B1AR13;B2RWE3	B1AR13;B2RWE3	CDGSH iron-sulfur domain-containing protein 3, mitochondrial	Cisd3	>sp|B1AR13|CISD3_MOUSE CDGSH iron-sulfur domain-containing protein 3, mitochondrial OS=Mus musculus GN=Cisd3 PE=3 SV=1;>tr|B2RWE3|B2RWE3_MOUSE CDGSH iron sulfur domain 3 OS=Mus musculus GN=Cisd3 PE=2 SV=1	2	9	9	9	8	8	8	7	6	8	7	8	8	9	8	9	8	8	8	7	6	8	7	8	8	9	8	9	8	8	8	7	6	8	7	8	8	9	8	9	56.9	56.9	56.9	15.676	137
B1AR17;E9Q614;F7C528;B0QZH7;B0QZH8	B1AR17;E9Q614;F7C528		Chd3	>tr|B1AR17|B1AR17_MOUSE Chromodomain helicase DNA binding protein 3 OS=Mus musculus GN=Chd3 PE=4 SV=1;>tr|E9Q614|E9Q614_MOUSE Protein Chd3 OS=Mus musculus GN=Chd3 PE=4 SV=1;>tr|F7C528|F7C528_MOUSE Protein Chd3 (Fragment) OS=Mus musculus GN=Chd3 PE=4 SV=1	5	13	6	6	6	6	7	1	3	1	6	8	8	0	1	1	2	1	1	0	1	0	2	3	2	0	0	0	2	1	1	0	1	0	2	3	2	0	0	0	7.1	4.1	4.1	232.74	2055
B1AR27;P50544;B1AR28	B1AR27;P50544;B1AR28	Very long-chain specific acyl-CoA dehydrogenase, mitochondrial	Acadvl	>tr|B1AR27|B1AR27_MOUSE Acyl-Coenzyme A dehydrogenase, very long chain OS=Mus musculus GN=Acadvl PE=3 SV=1;>sp|P50544|ACADV_MOUSE Very long-chain specific acyl-CoA dehydrogenase, mitochondrial OS=Mus musculus GN=Acadvl PE=1 SV=3;>tr|B1AR28|B1AR28_MOUSE Acy	3	39	39	39	27	26	31	32	28	28	33	28	34	36	37	35	27	26	31	32	28	28	33	28	34	36	37	35	27	26	31	32	28	28	33	28	34	36	37	35	75.6	75.6	75.6	70.875	656
B1AR74;Q8CCN5;Q0VF62;Q3TAC0;F7C0F2;B1ARH6;Q8CCN5-2;F7CPM1;B1AR76;B1B0B3	B1AR74;Q8CCN5;Q0VF62;Q3TAC0;F7C0F2;B1ARH6;Q8CCN5-2;F7CPM1;B1AR76	Breast carcinoma-amplified sequence 3 homolog	Bcas3	>tr|B1AR74|B1AR74_MOUSE Breast carcinoma amplified sequence 3 OS=Mus musculus GN=Bcas3 PE=4 SV=1;>sp|Q8CCN5|BCAS3_MOUSE Breast carcinoma-amplified sequence 3 homolog OS=Mus musculus GN=Bcas3 PE=1 SV=2;>tr|Q0VF62|Q0VF62_MOUSE Bcas3 protein OS=Mus musculus G	10	4	4	4	3	3	3	3	3	3	3	2	2	2	2	2	3	3	3	3	3	3	3	2	2	2	2	2	3	3	3	3	3	3	3	2	2	2	2	2	5.4	5.4	5.4	102.77	943
B1AR85;P61963	B1AR85;P61963	DDB1- and CUL4-associated factor 7	Dcaf7	>tr|B1AR85|B1AR85_MOUSE WD repeat domain 68 OS=Mus musculus GN=Dcaf7 PE=4 SV=1;>sp|P61963|DCAF7_MOUSE DDB1- and CUL4-associated factor 7 OS=Mus musculus GN=Dcaf7 PE=2 SV=1	2	6	6	6	3	0	4	0	1	0	4	3	3	1	0	0	3	0	4	0	1	0	4	3	3	1	0	0	3	0	4	0	1	0	4	3	3	1	0	0	26	26	26	38.926	342
B1ARB3;Q08481;Q08481-3;Q08481-2;Q08481-4;E9Q0X6;B1ARA9	B1ARB3;Q08481;Q08481-3;Q08481-2;Q08481-4;E9Q0X6	Platelet endothelial cell adhesion molecule	Pecam1	>tr|B1ARB3|B1ARB3_MOUSE Platelet endothelial cell adhesion molecule OS=Mus musculus GN=Pecam1 PE=4 SV=1;>sp|Q08481|PECA1_MOUSE Platelet endothelial cell adhesion molecule OS=Mus musculus GN=Pecam1 PE=1 SV=1;>sp|Q08481-3|PECA1_MOUSE Isoform 3 of Platelet en	7	13	13	13	5	5	8	10	8	10	4	2	6	8	8	12	5	5	8	10	8	10	4	2	6	8	8	12	5	5	8	10	8	10	4	2	6	8	8	12	28.7	28.7	28.7	81.917	732
B1ARD6;B1ARD7;F6UG04	B1ARD6		Slfn9	>tr|B1ARD6|B1ARD6_MOUSE Protein Slfn9 OS=Mus musculus GN=Slfn9 PE=4 SV=1	3	3	3	3	2	2	1	0	0	0	1	2	0	0	0	1	2	2	1	0	0	0	1	2	0	0	0	1	2	2	1	0	0	0	1	2	0	0	0	1	4.5	4.5	4.5	103.99	910
B1ARJ1;P35330;G5E8M9;B1ARJ2;G3UWJ5	B1ARJ1;P35330;G5E8M9;B1ARJ2	Intercellular adhesion molecule 2	Icam2	>tr|B1ARJ1|B1ARJ1_MOUSE Intercellular adhesion molecule 2 OS=Mus musculus GN=Icam2 PE=4 SV=1;>sp|P35330|ICAM2_MOUSE Intercellular adhesion molecule 2 OS=Mus musculus GN=Icam2 PE=1 SV=1;>tr|G5E8M9|G5E8M9_MOUSE Intercellular adhesion molecule 2 (Fragment) OS	5	7	7	7	1	1	2	5	5	4	1	1	2	3	3	5	1	1	2	5	5	4	1	1	2	3	3	5	1	1	2	5	5	4	1	1	2	3	3	5	29.2	29.2	29.2	31.39	277
B1ARK1;Q9DBE9	B1ARK1;Q9DBE9	Putative rRNA methyltransferase 3	Ftsj3	>tr|B1ARK1|B1ARK1_MOUSE FtsJ homolog 3 (E. coli) OS=Mus musculus GN=Ftsj3 PE=3 SV=1;>sp|Q9DBE9|RRMJ3_MOUSE Putative rRNA methyltransferase 3 OS=Mus musculus GN=Ftsj3 PE=1 SV=1	2	5	5	5	2	3	2	1	1	1	2	3	4	2	1	1	2	3	2	1	1	1	2	3	4	2	1	1	2	3	2	1	1	1	2	3	4	2	1	1	8.6	8.6	8.6	95.531	838
B1ARK2;P62196;E9Q0L5	B1ARK2;P62196;E9Q0L5	26S protease regulatory subunit 8	Psmc5	>tr|B1ARK2|B1ARK2_MOUSE Protease (Prosome, macropain) 26S subunit, ATPase 5 OS=Mus musculus GN=Psmc5 PE=3 SV=1;>sp|P62196|PRS8_MOUSE 26S protease regulatory subunit 8 OS=Mus musculus GN=Psmc5 PE=1 SV=1;>tr|E9Q0L5|E9Q0L5_MOUSE 26S protease regulatory subuni	3	27	27	26	19	22	21	16	17	16	20	23	24	19	20	17	19	22	21	16	17	16	20	23	24	19	20	17	18	21	20	15	16	15	19	22	23	18	19	16	80	80	77.1	45.626	406
B1ARN8;P26150;E9PXG7;B1ARN9;P26149;B1ARP0;O35469;B1ARP1;E9Q007;Q3UIU9;Q61767;P24815;Q3UI20;A2AEP8;A2AEP7;Q61694	B1ARN8;P26150;E9PXG7;B1ARN9;P26149;B1ARP0	3 beta-hydroxysteroid dehydrogenase/Delta 5-->4-isomerase type 3;3-beta-hydroxy-Delta(5)-steroid dehydrogenase;Steroid Delta-isomerase;3 beta-hydroxysteroid dehydrogenase/Delta 5-->4-isomerase type 2;3-beta-hydroxy-Delta(5)-steroid dehydrogenase;Steroid Delta-isomerase	Hsd3b3;Hsd3b2	>tr|B1ARN8|B1ARN8_MOUSE Hydroxysteroid dehydrogenase-2, delta<5>-3-beta OS=Mus musculus GN=Hsd3b3 PE=3 SV=1;>sp|P26150|3BHS3_MOUSE 3 beta-hydroxysteroid dehydrogenase/Delta 5-->4-isomerase type 3 OS=Mus musculus GN=Hsd3b3 PE=2 SV=3;>tr|E9PXG7|E9PXG7_MOUSE	16	17	17	17	6	9	9	9	6	8	14	9	13	14	16	16	6	9	9	9	6	8	14	9	13	14	16	16	6	9	9	9	6	8	14	9	13	14	16	16	60.1	60.1	60.1	42.031	373
B1ARP3;Q5SSF7	B1ARP3;Q5SSF7	Protein FAM46C	Fam46c	>tr|B1ARP3|B1ARP3_MOUSE MCG48648 OS=Mus musculus GN=Fam46c PE=4 SV=1;>sp|Q5SSF7|FA46C_MOUSE Protein FAM46C OS=Mus musculus GN=Fam46c PE=2 SV=1	2	2	2	2	1	0	1	0	0	0	0	0	1	1	1	1	1	0	1	0	0	0	0	0	1	1	1	1	1	0	1	0	0	0	0	0	1	1	1	1	5.4	5.4	5.4	44.796	391
B1ARR1;Q8R3N2	B1ARR1;Q8R3N2	Major facilitator superfamily domain-containing protein 6-like	Mfsd6l	>tr|B1ARR1|B1ARR1_MOUSE Novel protein OS=Mus musculus GN=Mfsd6l PE=4 SV=1;>sp|Q8R3N2|MFS6L_MOUSE Major facilitator superfamily domain-containing protein 6-like OS=Mus musculus GN=Mfsd6l PE=2 SV=1	2	4	4	4	1	2	1	2	1	1	2	2	1	4	3	4	1	2	1	2	1	1	2	2	1	4	3	4	1	2	1	2	1	1	2	2	1	4	3	4	7.2	7.2	7.2	63.43	586
B1ARS2;Q9DA75;B1ARS3	B1ARS2;Q9DA75;B1ARS3	Major facilitator superfamily domain-containing protein 2A	Mfsd2a	>tr|B1ARS2|B1ARS2_MOUSE Major facilitator superfamily domain containing 2 OS=Mus musculus GN=Mfsd2a PE=4 SV=1;>sp|Q9DA75|MFS2A_MOUSE Major facilitator superfamily domain-containing protein 2A OS=Mus musculus GN=Mfsd2a PE=2 SV=1;>tr|B1ARS3|B1ARS3_MOUSE Majo	3	6	6	6	0	0	3	5	5	3	3	2	3	5	4	5	0	0	3	5	5	3	3	2	3	5	4	5	0	0	3	5	5	3	3	2	3	5	4	5	17.6	17.6	17.6	58.983	534
B1ARS8;O88876;G5E8W9;B1ART0;O88876-2;B1ARS9;H7BX54	B1ARS8;O88876;G5E8W9;B1ART0;O88876-2;B1ARS9	Short-chain dehydrogenase/reductase 3	Dhrs3	>tr|B1ARS8|B1ARS8_MOUSE Dehydrogenase/reductase (SDR family) member 3 OS=Mus musculus GN=Dhrs3 PE=3 SV=1;>sp|O88876|DHRS3_MOUSE Short-chain dehydrogenase/reductase 3 OS=Mus musculus GN=Dhrs3 PE=2 SV=2;>tr|G5E8W9|G5E8W9_MOUSE Dehydrogenase/reductase (SDR fa	7	9	9	9	4	4	6	6	3	4	6	8	6	8	7	5	4	4	6	6	3	4	6	8	6	8	7	5	4	4	6	6	3	4	6	8	6	8	7	5	40.1	40.1	40.1	33.652	302
B1ART2;B1ART1;D3Z646;F6XI52	B1ART2;B1ART1		Vps13d	>tr|B1ART2|B1ART2_MOUSE Protein Vps13d OS=Mus musculus GN=Vps13d PE=4 SV=1;>tr|B1ART1|B1ART1_MOUSE Protein Vps13d OS=Mus musculus GN=Vps13d PE=4 SV=1	4	20	20	20	6	6	7	6	5	2	9	9	11	6	6	7	6	6	7	6	5	2	9	9	11	6	6	7	6	6	7	6	5	2	9	9	11	6	6	7	5.7	5.7	5.7	490.18	4384
B1ARZ3;P0C6A1	B1ARZ3;P0C6A1	Solute carrier family 2, facilitated glucose transporter member 7	Slc2a7	>tr|B1ARZ3|B1ARZ3_MOUSE Solute carrier family 2 (Facilitated glucose transporter), member 7 OS=Mus musculus GN=Slc2a7 PE=3 SV=1;>sp|P0C6A1|GTR7_MOUSE Solute carrier family 2, facilitated glucose transporter member 7 OS=Mus musculus GN=Slc2a7 PE=3 SV=1	2	5	5	5	2	3	3	4	4	4	1	3	3	4	5	4	2	3	3	4	4	4	1	3	3	4	5	4	2	3	3	4	4	4	1	3	3	4	5	4	11	11	11	57.181	525
B1AS02;Q8K3C3;B1AS04;B1AS03	B1AS02;Q8K3C3;B1AS04	Protein LZIC	Lzic	>tr|B1AS02|B1AS02_MOUSE Leucine zipper and CTNNBIP1 domain containing OS=Mus musculus GN=Lzic PE=4 SV=1;>sp|Q8K3C3|LZIC_MOUSE Protein LZIC OS=Mus musculus GN=Lzic PE=1 SV=1;>tr|B1AS04|B1AS04_MOUSE Leucine zipper and CTNNBIP1 domain containing (Fragment) OS	4	8	8	8	7	8	7	2	2	2	8	7	7	3	3	4	7	8	7	2	2	2	8	7	7	3	3	4	7	8	7	2	2	2	8	7	7	3	3	4	40	40	40	21.536	190
B1AS38;Q921S7	B1AS38;Q921S7	39S ribosomal protein L37, mitochondrial	Mrpl37	>tr|B1AS38|B1AS38_MOUSE Mitochondrial ribosomal protein L37 OS=Mus musculus GN=Mrpl37 PE=4 SV=1;>sp|Q921S7|RM37_MOUSE 39S ribosomal protein L37, mitochondrial OS=Mus musculus GN=Mrpl37 PE=2 SV=1	2	22	22	22	13	14	16	7	8	7	17	15	19	12	12	10	13	14	16	7	8	7	17	15	19	12	12	10	13	14	16	7	8	7	17	15	19	12	12	10	70	70	70	48.34	423
B1AS46;F6RRC7;Q9CWL2;Q9CWL2-2;B1AS48;B1AS47	B1AS46;F6RRC7;Q9CWL2;Q9CWL2-2	Zinc finger protein castor homolog 1	Casz1	>tr|B1AS46|B1AS46_MOUSE Castor homolog 1, zinc finger (Drosophila) OS=Mus musculus GN=Casz1 PE=4 SV=1;>tr|F6RRC7|F6RRC7_MOUSE Zinc finger protein castor homolog 1 OS=Mus musculus GN=Casz1 PE=4 SV=1;>sp|Q9CWL2|CASZ1_MOUSE Zinc finger protein castor homolog	6	17	17	17	9	5	10	2	2	0	11	7	10	2	2	2	9	5	10	2	2	0	11	7	10	2	2	2	9	5	10	2	2	0	11	7	10	2	2	2	15	15	15	191.28	1762
B1AS53;P70698	B1AS53;P70698	CTP synthase 1	Ctps	>tr|B1AS53|B1AS53_MOUSE Cytidine 5-triphosphate synthase OS=Mus musculus GN=Ctps PE=3 SV=1;>sp|P70698|PYRG1_MOUSE CTP synthase 1 OS=Mus musculus GN=Ctps1 PE=1 SV=2	2	13	13	12	6	5	7	3	2	2	10	6	7	3	3	2	6	5	7	3	2	2	10	6	7	3	3	2	5	4	6	2	1	1	9	5	6	2	2	1	32.3	32.3	30.3	66.682	591
B1AS87;Q9D198	B1AS87;Q9D198	Pre-mRNA-splicing factor SYF2	Syf2	>tr|B1AS87|B1AS87_MOUSE SYF2 homolog, RNA splicing factor (S. cerevisiae) OS=Mus musculus GN=Syf2 PE=4 SV=1;>sp|Q9D198|SYF2_MOUSE Pre-mRNA-splicing factor SYF2 OS=Mus musculus GN=Syf2 PE=2 SV=1	2	4	4	4	3	2	2	0	0	0	4	3	3	0	1	1	3	2	2	0	0	0	4	3	3	0	1	1	3	2	2	0	0	0	4	3	3	0	1	1	25.2	25.2	25.2	28.712	242
B1AS89;Q9R0A0;D6RH82	B1AS89;Q9R0A0	Peroxisomal membrane protein PEX14	Pex14	>tr|B1AS89|B1AS89_MOUSE Peroxisomal biogenesis factor 14 OS=Mus musculus GN=Pex14 PE=4 SV=1;>sp|Q9R0A0|PEX14_MOUSE Peroxisomal membrane protein PEX14 OS=Mus musculus GN=Pex14 PE=1 SV=1	3	15	15	15	9	9	10	9	8	8	11	10	10	11	13	12	9	9	10	9	8	8	11	10	10	11	13	12	9	9	10	9	8	8	11	10	10	11	13	12	74.7	74.7	74.7	41.207	376
B1ASC5;Q8BIZ6	B1ASC5;Q8BIZ6	Smad nuclear-interacting protein 1	Snip1	>tr|B1ASC5|B1ASC5_MOUSE Smad nuclear interacting protein 1 OS=Mus musculus GN=Snip1 PE=4 SV=1;>sp|Q8BIZ6|SNIP1_MOUSE Smad nuclear-interacting protein 1 OS=Mus musculus GN=Snip1 PE=1 SV=1	2	4	4	4	4	3	4	0	0	1	3	2	3	0	0	1	4	3	4	0	0	1	3	2	3	0	0	1	4	3	4	0	0	1	3	2	3	0	0	1	14.6	14.6	14.6	44.415	383
B1ASD4;Q8BJG4	B1ASD4;Q8BJG4	MOB kinase activator 3C	Mob3c	>tr|B1ASD4|B1ASD4_MOUSE MOB1, Mps One Binder kinase activator-like 2C (Yeast) OS=Mus musculus GN=Mob3c PE=2 SV=1;>sp|Q8BJG4|MOB3C_MOUSE MOB kinase activator 3C OS=Mus musculus GN=Mob3c PE=2 SV=1	2	1	1	1	0	0	1	0	0	0	0	1	1	0	0	0	0	0	1	0	0	0	0	1	1	0	0	0	0	0	1	0	0	0	0	1	1	0	0	0	11.6	11.6	11.6	25.52	216
B1ASF3;Q80U78-2;E9QL01;B1ASF2;Q80U78;Q3TQ21;Q80U78-3;Q3TTW5;E9Q6M7;Q80U78-4	B1ASF3;Q80U78-2;E9QL01;B1ASF2;Q80U78;Q3TQ21;Q80U78-3;Q3TTW5;E9Q6M7	Pumilio homolog 1	Pum1	>tr|B1ASF3|B1ASF3_MOUSE Pumilio 1 (Drosophila) OS=Mus musculus GN=Pum1 PE=4 SV=1;>sp|Q80U78-2|PUM1_MOUSE Isoform 2 of Pumilio homolog 1 OS=Mus musculus GN=Pum1;>tr|E9QL01|E9QL01_MOUSE Pumilio homolog 1 OS=Mus musculus GN=Pum1 PE=4 SV=1;>tr|B1ASF2|B1ASF2_MO	10	10	10	9	5	8	8	1	3	2	8	6	8	2	2	2	5	8	8	1	3	2	8	6	8	2	2	2	5	8	8	1	3	2	8	6	7	2	2	2	12.1	12.1	11.2	126.33	1186
B1ASF5;Q64519	B1ASF5;Q64519	Syndecan;Syndecan-3	Sdc3	>tr|B1ASF5|B1ASF5_MOUSE Syndecan OS=Mus musculus GN=Sdc3 PE=3 SV=1;>sp|Q64519|SDC3_MOUSE Syndecan-3 OS=Mus musculus GN=Sdc3 PE=2 SV=2	2	1	1	1	0	0	0	0	0	0	1	1	1	0	0	0	0	0	0	0	0	0	1	1	1	0	0	0	0	0	0	0	0	0	1	1	1	0	0	0	2.5	2.5	2.5	46.001	442
B1ASG4;O08914	B1ASG4;O08914	Fatty-acid amide hydrolase 1	Faah	>tr|B1ASG4|B1ASG4_MOUSE Fatty acid amide hydrolase OS=Mus musculus GN=Faah PE=4 SV=1;>sp|O08914|FAAH1_MOUSE Fatty-acid amide hydrolase 1 OS=Mus musculus GN=Faah PE=2 SV=1	2	27	27	27	11	15	17	15	16	14	18	20	21	23	26	23	11	15	17	15	16	14	18	20	21	23	26	23	11	15	17	15	16	14	18	20	21	23	26	23	66.1	66.1	66.1	63.221	579
B1ASG5;P99028	B1ASG5;P99028	Cytochrome b-c1 complex subunit 6, mitochondrial	Uqcrh	>tr|B1ASG5|B1ASG5_MOUSE Ubiquinol-cytochrome c reductase hinge protein OS=Mus musculus GN=Uqcrh PE=4 SV=1;>sp|P99028|QCR6_MOUSE Cytochrome b-c1 complex subunit 6, mitochondrial OS=Mus musculus GN=Uqcrh PE=1 SV=2	2	9	9	9	4	4	5	8	8	7	6	5	8	7	6	5	4	4	5	8	8	7	6	5	8	7	6	5	4	4	5	8	8	7	6	5	8	7	6	5	80.9	80.9	80.9	10.435	89
B1ASJ7;Q8BH35;B1ASJ8;Q8BH35-2	B1ASJ7;Q8BH35;B1ASJ8;Q8BH35-2	Complement component C8 beta chain	C8b	>tr|B1ASJ7|B1ASJ7_MOUSE Complement component 8, beta subunit OS=Mus musculus GN=C8b PE=4 SV=1;>sp|Q8BH35|CO8B_MOUSE Complement component C8 beta chain OS=Mus musculus GN=C8b PE=1 SV=1;>tr|B1ASJ8|B1ASJ8_MOUSE Complement component 8, beta subunit OS=Mus musc	4	4	4	4	2	1	2	0	1	1	1	1	1	0	1	1	2	1	2	0	1	1	1	1	1	0	1	1	2	1	2	0	1	1	1	1	1	0	1	1	9.2	9.2	9.2	66.229	589
B1ASK8;B1ASK9;Q6P073;B0QZM1;B0QZM0	B1ASK8;B1ASK9;Q6P073;B0QZM1	Ubiquitin-conjugating enzyme E2 J2	Ube2j2	>tr|B1ASK8|B1ASK8_MOUSE Ubiquitin-conjugating enzyme E2 J2 OS=Mus musculus GN=Ube2j2 PE=4 SV=1;>tr|B1ASK9|B1ASK9_MOUSE Ubiquitin-conjugating enzyme E2, J2 homolog (Yeast) OS=Mus musculus GN=Ube2j2 PE=4 SV=1;>sp|Q6P073|UB2J2_MOUSE Ubiquitin-conjugating enzy	5	3	3	3	2	1	2	2	1	1	3	2	2	3	2	2	2	1	2	2	1	1	3	2	2	3	2	2	2	1	2	2	1	1	3	2	2	3	2	2	23.2	23.2	23.2	30.292	271
B1ASL0;Q91Z92	B1ASL0;Q91Z92	Beta-1,3-galactosyltransferase 6	B3galt6	>tr|B1ASL0|B1ASL0_MOUSE UDP-Gal:betaGal beta 1,3-galactosyltransferase, polypeptide 6 OS=Mus musculus GN=B3galt6 PE=4 SV=1;>sp|Q91Z92|B3GT6_MOUSE Beta-1,3-galactosyltransferase 6 OS=Mus musculus GN=B3galt6 PE=2 SV=1	2	8	8	8	3	4	2	7	5	5	3	3	5	8	7	8	3	4	2	7	5	5	3	3	5	8	7	8	3	4	2	7	5	5	3	3	5	8	7	8	32.6	32.6	32.6	37.021	325
B1ASM1;Q99JY8	B1ASM1;Q99JY8	Lipid phosphate phosphohydrolase 3	Ppap2b	>tr|B1ASM1|B1ASM1_MOUSE Phosphatidic acid phosphatase type 2B OS=Mus musculus GN=Ppap2b PE=4 SV=1;>sp|Q99JY8|LPP3_MOUSE Lipid phosphate phosphohydrolase 3 OS=Mus musculus GN=Ppap2b PE=1 SV=1	2	7	7	7	5	6	3	6	6	4	5	4	4	5	6	6	5	6	3	6	6	4	5	4	4	5	6	6	5	6	3	6	6	4	5	4	4	5	6	6	21.8	21.8	21.8	35.216	312
B1ASP2;P52332;B1ASP3	B1ASP2;P52332	Tyrosine-protein kinase;Tyrosine-protein kinase JAK1	Jak1	>tr|B1ASP2|B1ASP2_MOUSE Tyrosine-protein kinase OS=Mus musculus GN=Jak1 PE=3 SV=1;>sp|P52332|JAK1_MOUSE Tyrosine-protein kinase JAK1 OS=Mus musculus GN=Jak1 PE=1 SV=1	3	25	25	24	11	15	15	15	16	15	11	12	9	13	17	12	11	15	15	15	16	15	11	12	9	13	17	12	10	14	15	14	15	14	10	11	8	12	16	11	28.3	28.3	27.6	133.35	1153
B1ASZ0;Q64516-1;Q64516;Q64516-2;B1ASZ3;Q9WU65	B1ASZ0;Q64516-1;Q64516;Q64516-2;B1ASZ3	Glycerol kinase	Gyk;Gk	>tr|B1ASZ0|B1ASZ0_MOUSE Glycerol kinase OS=Mus musculus GN=Gyk PE=3 SV=1;>sp|Q64516-1|GLPK_MOUSE Isoform 1 of Glycerol kinase OS=Mus musculus GN=Gk;>sp|Q64516|GLPK_MOUSE Glycerol kinase OS=Mus musculus GN=Gk PE=2 SV=2;>sp|Q64516-2|GLPK_MOUSE Isoform 2 of G	6	25	25	21	19	20	22	16	16	18	22	22	22	22	23	21	19	20	22	16	16	18	22	22	22	22	23	21	18	18	20	14	14	16	18	18	19	20	21	19	60.9	60.9	56.1	57.457	524
B1AT66;B1AT66-2	B1AT66;B1AT66-2	Monocarboxylate transporter 7	Slc16a6	>sp|B1AT66|MOT7_MOUSE Monocarboxylate transporter 7 OS=Mus musculus GN=Slc16a6 PE=1 SV=1;>sp|B1AT66-2|MOT7_MOUSE Isoform 2 of Monocarboxylate transporter 7 OS=Mus musculus GN=Slc16a6	2	4	4	4	0	2	1	4	4	3	0	0	1	3	3	3	0	2	1	4	4	3	0	0	1	3	3	3	0	2	1	4	4	3	0	0	1	3	3	3	8.1	8.1	8.1	66.235	607
B1AT82;Q9D0M1;B1AT83;B1AT84	B1AT82;Q9D0M1;B1AT83	Phosphoribosyl pyrophosphate synthase-associated protein 1	Prpsap1	>tr|B1AT82|B1AT82_MOUSE MCG6846, isoform CRA_c OS=Mus musculus GN=Prpsap1 PE=4 SV=1;>sp|Q9D0M1|KPRA_MOUSE Phosphoribosyl pyrophosphate synthase-associated protein 1 OS=Mus musculus GN=Prpsap1 PE=1 SV=1;>tr|B1AT83|B1AT83_MOUSE Phosphoribosyl pyrophosphate s	4	14	14	12	10	11	11	9	6	9	11	13	13	12	13	13	10	11	11	9	6	9	11	13	13	12	13	13	8	9	9	8	6	8	9	11	11	11	11	11	47.8	47.8	40.5	42.467	385
B1ATA0	B1ATA0		2310067B10Rik	>tr|B1ATA0|B1ATA0_MOUSE Novel protein (Fragment) OS=Mus musculus GN=2310067B10Rik PE=4 SV=1	1	5	1	1	2	3	2	0	2	0	2	3	3	0	0	0	0	1	0	0	0	0	0	1	1	0	0	0	0	1	0	0	0	0	0	1	1	0	0	0	27.1	4	4	33.08	299
B1ATB3;Q7TN60;Q7TN60-2;E9QNL9;Q7TN60-3;Q7TN60-4;B1ATB5;D6RCY1;F7D254;B1ATB6	B1ATB3;Q7TN60;Q7TN60-2;E9QNL9;Q7TN60-3;Q7TN60-4;B1ATB5	Transmembrane channel-like protein 6	Tmc6	>tr|B1ATB3|B1ATB3_MOUSE Transmembrane channel-like gene family 6 OS=Mus musculus GN=Tmc6 PE=4 SV=1;>sp|Q7TN60|TMC6_MOUSE Transmembrane channel-like protein 6 OS=Mus musculus GN=Tmc6 PE=2 SV=2;>sp|Q7TN60-2|TMC6_MOUSE Isoform 2 of Transmembrane channel-like	10	12	12	12	2	5	5	9	7	9	6	3	6	9	10	10	2	5	5	9	7	9	6	3	6	9	10	10	2	5	5	9	7	9	6	3	6	9	10	10	18.4	18.4	18.4	90.575	810
B1ATC2;O55101;B0QZP8;H3BIZ8;H3BKF4;H3BJY1;H3BJ78	B1ATC2;O55101;B0QZP8;H3BIZ8;H3BKF4;H3BJY1;H3BJ78	Synaptogyrin-2	Syngr2	>tr|B1ATC2|B1ATC2_MOUSE Synaptogyrin 2 OS=Mus musculus GN=Syngr2 PE=4 SV=1;>sp|O55101|SNG2_MOUSE Synaptogyrin-2 OS=Mus musculus GN=Syngr2 PE=2 SV=1;>tr|B0QZP8|B0QZP8_MOUSE Synaptogyrin 2 OS=Mus musculus GN=Syngr2 PE=4 SV=1;>tr|H3BIZ8|H3BIZ8_MOUSE Synaptogy	7	2	2	2	2	2	2	2	2	2	2	2	2	2	2	2	2	2	2	2	2	2	2	2	2	2	2	2	2	2	2	2	2	2	2	2	2	2	2	2	12.5	12.5	12.5	24.778	224
B1ATD2;Q60787;B1ATD1	B1ATD2;Q60787;B1ATD1	Lymphocyte cytosolic protein 2	Lcp2	>tr|B1ATD2|B1ATD2_MOUSE Lymphocyte cytosolic protein 2 OS=Mus musculus GN=Lcp2 PE=4 SV=1;>sp|Q60787|LCP2_MOUSE Lymphocyte cytosolic protein 2 OS=Mus musculus GN=Lcp2 PE=1 SV=2;>tr|B1ATD1|B1ATD1_MOUSE Lymphocyte cytosolic protein 2 OS=Mus musculus GN=Lcp2 P	3	1	1	1	0	1	1	0	0	0	1	1	1	0	0	0	0	1	1	0	0	0	1	1	1	0	0	0	0	1	1	0	0	0	1	1	1	0	0	0	4.1	4.1	4.1	60.367	534
B1ATE1;Q80ZD3;Q80ZD3-2	B1ATE1;Q80ZD3;Q80ZD3-2	Sodium-independent sulfate anion transporter	Slc26a11	>tr|B1ATE1|B1ATE1_MOUSE Solute carrier family 26, member 11 OS=Mus musculus GN=Slc26a11 PE=4 SV=1;>sp|Q80ZD3|S2611_MOUSE Sodium-independent sulfate anion transporter OS=Mus musculus GN=Slc26a11 PE=2 SV=2;>sp|Q80ZD3-2|S2611_MOUSE Isoform 2 of Sodium-indepen	3	4	4	4	1	2	1	1	3	1	1	0	0	1	2	2	1	2	1	1	3	1	1	0	0	1	2	2	1	2	1	1	3	1	1	0	0	1	2	2	9.6	9.6	9.6	64.109	593
B1ATI0;B1AV77;P47740;Q8C5J1	B1ATI0;B1AV77;P47740;Q8C5J1	Aldehyde dehydrogenase;Fatty aldehyde dehydrogenase	Aldh3a2	>tr|B1ATI0|B1ATI0_MOUSE Aldehyde dehydrogenase OS=Mus musculus GN=Aldh3a2 PE=3 SV=1;>tr|B1AV77|B1AV77_MOUSE Aldehyde dehydrogenase OS=Mus musculus GN=Aldh3a2 PE=3 SV=1;>sp|P47740|AL3A2_MOUSE Fatty aldehyde dehydrogenase OS=Mus musculus GN=Aldh3a2 PE=2 SV=2	4	28	28	26	19	20	19	17	14	19	23	24	24	23	26	25	19	20	19	17	14	19	23	24	24	23	26	25	17	18	17	15	12	17	21	22	22	21	24	23	65	65	62.8	59.276	532
B1ATU5;Q8C2P3;B1ATU6;B1ATU7	B1ATU5;Q8C2P3;B1ATU6;B1ATU7	tRNA-dihydrouridine(16/17) synthase [NAD(P)(+)]-like	Dus1l	>tr|B1ATU5|B1ATU5_MOUSE Dihydrouridine synthase 1-like (S. cerevisiae) OS=Mus musculus GN=Dus1l PE=4 SV=1;>sp|Q8C2P3|DUS1L_MOUSE tRNA-dihydrouridine(16/17) synthase [NAD(P)(+)]-like OS=Mus musculus GN=Dus1l PE=2 SV=1;>tr|B1ATU6|B1ATU6_MOUSE Dihydrouridine	4	2	2	2	0	0	2	0	0	0	2	1	1	0	0	0	0	0	2	0	0	0	2	1	1	0	0	0	0	0	2	0	0	0	2	1	1	0	0	0	6.2	6.2	6.2	54.164	482
B1ATV0;Q9WVD4	B1ATV0;Q9WVD4	H(+)/Cl(-) exchange transporter 5	Clcn5	>tr|B1ATV0|B1ATV0_MOUSE Chloride channel 5 OS=Mus musculus GN=Clcn5 PE=4 SV=1;>sp|Q9WVD4|CLCN5_MOUSE H(+)/Cl(-) exchange transporter 5 OS=Mus musculus GN=Clcn5 PE=2 SV=1	2	12	8	7	4	4	4	7	5	5	4	3	6	9	10	10	2	1	1	5	3	3	2	1	3	5	6	7	2	1	1	5	3	3	2	1	3	5	5	7	17.5	12.9	12	90.705	816
B1ATZ4;Q9QZD8	B1ATZ4;Q9QZD8	Mitochondrial dicarboxylate carrier	Slc25a10	>tr|B1ATZ4|B1ATZ4_MOUSE Solute carrier family 25 (Mitochondrial carrier, dicarboxylate transporter), member 10 OS=Mus musculus GN=Slc25a10 PE=3 SV=1;>sp|Q9QZD8|DIC_MOUSE Mitochondrial dicarboxylate carrier OS=Mus musculus GN=Slc25a10 PE=2 SV=2	2	20	20	20	12	14	15	16	16	16	16	16	14	16	16	17	12	14	15	16	16	16	16	16	14	16	16	17	12	14	15	16	16	16	16	16	14	16	16	17	74.9	74.9	74.9	31.715	287
B1ATZ9;Q64444;E9PVN8;F6ST32	B1ATZ9;Q64444;E9PVN8;F6ST32	Carbonic anhydrase 4	Car4;Ca4	>tr|B1ATZ9|B1ATZ9_MOUSE Carbonic anhydrase 4 OS=Mus musculus GN=Car4 PE=4 SV=1;>sp|Q64444|CAH4_MOUSE Carbonic anhydrase 4 OS=Mus musculus GN=Ca4 PE=1 SV=1;>tr|E9PVN8|E9PVN8_MOUSE Protein Car4 OS=Mus musculus GN=Car4 PE=4 SV=1;>tr|F6ST32|F6ST32_MOUSE Protei	4	10	10	10	8	6	7	8	9	8	6	7	7	8	8	9	8	6	7	8	9	8	6	7	7	8	8	9	8	6	7	8	9	8	6	7	7	8	8	9	39.7	39.7	39.7	34.351	305
B1AU24;Q9Z0X1;B1AU25	B1AU24;Q9Z0X1;B1AU25	Apoptosis-inducing factor 1, mitochondrial	Aifm1	>tr|B1AU24|B1AU24_MOUSE Apoptosis-inducing factor, mitochondrion-associated 1 OS=Mus musculus GN=Aifm1 PE=4 SV=1;>sp|Q9Z0X1|AIFM1_MOUSE Apoptosis-inducing factor 1, mitochondrial OS=Mus musculus GN=Aifm1 PE=1 SV=1;>tr|B1AU25|B1AU25_MOUSE Apoptosis-inducing	3	29	29	29	22	20	24	22	20	20	23	23	28	24	23	23	22	20	24	22	20	20	23	23	28	24	23	23	22	20	24	22	20	20	23	23	28	24	23	23	57	57	57	66.765	612
B1AU74;Q9CWP6;B1AU72;Q9CWP6-3;B1AU73;Q9CWP6-2;Q9CWP6-4	B1AU74;Q9CWP6;B1AU72;Q9CWP6-3;B1AU73;Q9CWP6-2	Motile sperm domain-containing protein 2	Mospd2	>tr|B1AU74|B1AU74_MOUSE Motile sperm domain containing 2 OS=Mus musculus GN=Mospd2 PE=4 SV=1;>sp|Q9CWP6|MSPD2_MOUSE Motile sperm domain-containing protein 2 OS=Mus musculus GN=Mospd2 PE=1 SV=2;>tr|B1AU72|B1AU72_MOUSE Motile sperm domain containing 2 OS=Mus	7	9	9	9	3	3	5	3	4	2	4	3	6	6	5	5	3	3	5	3	4	2	4	3	6	6	5	5	3	3	5	3	4	2	4	3	6	6	5	5	21.4	21.4	21.4	59.81	518
B1AU75;Q99MD9;B2RQY6	B1AU75;Q99MD9	Nuclear autoantigenic sperm protein	Nasp	>tr|B1AU75|B1AU75_MOUSE Nuclear autoantigenic sperm protein OS=Mus musculus GN=Nasp PE=4 SV=1;>sp|Q99MD9|NASP_MOUSE Nuclear autoantigenic sperm protein OS=Mus musculus GN=Nasp PE=1 SV=2	3	20	20	3	17	16	17	6	6	8	16	17	18	8	7	3	17	16	17	6	6	8	16	17	18	8	7	3	2	1	3	0	1	0	2	3	3	0	0	0	34.4	34.4	5.3	84.012	773
B1AU76;B1AU77;Q99MD9-2	B1AU76;B1AU77;Q99MD9-2		Nasp	>tr|B1AU76|B1AU76_MOUSE Nuclear autoantigenic sperm protein OS=Mus musculus GN=Nasp PE=4 SV=1;>tr|B1AU77|B1AU77_MOUSE Nuclear autoantigenic sperm protein (Histone-binding) OS=Mus musculus GN=Nasp PE=4 SV=1;>sp|Q99MD9-2|NASP_MOUSE Isoform 2 of Nuclear autoa	3	18	1	1	16	15	15	6	5	8	15	15	16	8	7	3	1	0	1	0	0	0	1	1	1	0	0	0	1	0	1	0	0	0	1	1	1	0	0	0	56.5	6.2	6.2	48.765	448
B1AUA4;Q9QXV0;E9Q3F0;REV__A2BE28;REV__A2BE28-2	B1AUA4;Q9QXV0	ProSAAS;KEP;Big SAAS;Little SAAS;Big PEN-LEN;PEN;PEN-20;PEN-19;Little LEN;Big LEN	Pcsk1n	>tr|B1AUA4|B1AUA4_MOUSE Proprotein convertase subtilisin/kexin type 1 inhibitor OS=Mus musculus GN=Pcsk1n PE=4 SV=1;>sp|Q9QXV0|PCSK1_MOUSE ProSAAS OS=Mus musculus GN=Pcsk1n PE=1 SV=2	5	6	6	6	5	4	5	2	3	3	5	4	6	3	1	0	5	4	5	2	3	3	5	4	6	3	1	0	5	4	5	2	3	3	5	4	6	3	1	0	32.9	32.9	32.9	27.27	258
B1AUD0;Q62283;Q3UHG5	B1AUD0;Q62283;Q3UHG5	Tetraspanin-7	Tspan7	>tr|B1AUD0|B1AUD0_MOUSE Tetraspanin 7 OS=Mus musculus GN=Tspan7 PE=4 SV=1;>sp|Q62283|TSN7_MOUSE Tetraspanin-7 OS=Mus musculus GN=Tspan7 PE=2 SV=2;>tr|Q3UHG5|Q3UHG5_MOUSE Tetraspanin 7 OS=Mus musculus GN=Tspan7 PE=2 SV=1	3	3	3	3	2	2	2	1	2	2	1	2	1	2	2	2	2	2	2	1	2	2	1	2	1	2	2	2	2	2	2	1	2	2	1	2	1	2	2	2	16.1	16.1	16.1	27.544	249
B1AUE5	B1AUE5	Peroxisome biogenesis factor 10	Pex10	>sp|B1AUE5|PEX10_MOUSE Peroxisome biogenesis factor 10 OS=Mus musculus GN=Pex10 PE=2 SV=1	1	6	6	6	4	5	5	4	3	3	6	3	6	5	5	4	4	5	5	4	3	3	6	3	6	5	5	4	4	5	5	4	3	3	6	3	6	5	5	4	22.2	22.2	22.2	37.157	324
B1AUE6;Q9CQU3	B1AUE6;Q9CQU3	Protein RER1	Rer1	>tr|B1AUE6|B1AUE6_MOUSE RER1 retention in endoplasmic reticulum 1 homolog (S. cerevisiae) OS=Mus musculus GN=Rer1 PE=4 SV=1;>sp|Q9CQU3|RER1_MOUSE Protein RER1 OS=Mus musculus GN=Rer1 PE=1 SV=1	2	10	10	10	8	10	7	8	8	7	8	8	10	10	10	9	8	10	7	8	8	7	8	8	10	10	10	9	8	10	7	8	8	7	8	8	10	10	10	9	45.4	45.4	45.4	22.988	196
B1AUG5;F6Q8D3;Q9QZW0;E9QKK8;Q9QZW0-2;F6U8D7	B1AUG5;F6Q8D3;Q9QZW0;E9QKK8;Q9QZW0-2;F6U8D7	Probable phospholipid-transporting ATPase 11C	Atp11c	>tr|B1AUG5|B1AUG5_MOUSE Atpase, class VI, type 11C OS=Mus musculus GN=Atp11c PE=4 SV=1;>tr|F6Q8D3|F6Q8D3_MOUSE Probable phospholipid-transporting ATPase 11C OS=Mus musculus GN=Atp11c PE=4 SV=1;>sp|Q9QZW0|AT11C_MOUSE Probable phospholipid-transporting ATPas	6	9	6	6	6	8	6	8	6	5	3	6	3	5	6	7	3	5	4	5	4	3	1	3	2	3	5	4	3	5	4	5	4	3	1	3	2	3	5	4	9.5	7.4	7.4	129.24	1129
B1AUH5	B1AUH5		Cask	>tr|B1AUH5|B1AUH5_MOUSE Calcium/calmodulin-dependent serine protein kinase (MAGUK family) (Fragment) OS=Mus musculus GN=Cask PE=4 SV=1	1	7	1	1	3	3	4	7	4	6	4	4	6	6	6	7	0	0	0	1	1	1	0	0	1	1	1	1	0	0	0	1	1	1	0	0	1	1	1	1	52.9	7.7	7.7	17.734	155
B1AUK1;Q9JI44;Q9JI44-2	B1AUK1;Q9JI44;Q9JI44-2	DNA methyltransferase 1-associated protein 1	Dmap1	>tr|B1AUK1|B1AUK1_MOUSE DNA methyltransferase 1-associated protein 1 OS=Mus musculus GN=Dmap1 PE=4 SV=1;>sp|Q9JI44|DMAP1_MOUSE DNA methyltransferase 1-associated protein 1 OS=Mus musculus GN=Dmap1 PE=1 SV=1;>sp|Q9JI44-2|DMAP1_MOUSE Isoform 2 of DNA methylt	3	3	3	3	2	1	1	0	0	0	0	2	0	0	0	0	2	1	1	0	0	0	0	2	0	0	0	0	2	1	1	0	0	0	0	2	0	0	0	0	11.5	11.5	11.5	53.129	468
B1AUN1;Q8BH43;E9PWN7;B1AUN0	B1AUN1;Q8BH43	Wiskott-Aldrich syndrome protein family member 2	Wasf2	>tr|B1AUN1|B1AUN1_MOUSE WAS protein family, member 2 OS=Mus musculus GN=Wasf2 PE=4 SV=1;>sp|Q8BH43|WASF2_MOUSE Wiskott-Aldrich syndrome protein family member 2 OS=Mus musculus GN=Wasf2 PE=1 SV=1	4	13	13	13	8	9	10	6	8	9	8	8	11	8	8	7	8	9	10	6	8	9	8	8	11	8	8	7	8	9	10	6	8	9	8	8	11	8	8	7	31.6	31.6	31.6	54.073	497
B1AUN2;Q3UKV0;B1AUN3;A4FUS0;Q3T9T4	B1AUN2;Q3UKV0;B1AUN3;A4FUS0		Eif2b3	>tr|B1AUN2|B1AUN2_MOUSE Eukaryotic translation initiation factor 2B, subunit 3 OS=Mus musculus GN=Eif2b3 PE=4 SV=1;>tr|Q3UKV0|Q3UKV0_MOUSE Protein Eif2b3 OS=Mus musculus GN=Eif2b3 PE=2 SV=1;>tr|B1AUN3|B1AUN3_MOUSE Eukaryotic translation initiation factor 2	5	9	9	9	6	6	6	3	1	3	4	5	6	4	5	5	6	6	6	3	1	3	4	5	6	4	5	5	6	6	6	3	1	3	4	5	6	4	5	5	30.5	30.5	30.5	50.488	452
B1AUP4;Q9D0B6;Q9D0B6-2	B1AUP4;Q9D0B6;Q9D0B6-2	UPF0368 protein Cxorf26 homolog	2610029G23Rik	>tr|B1AUP4|B1AUP4_MOUSE RIKEN cDNA 2610029G23 OS=Mus musculus GN=2610029G23Rik PE=4 SV=1;>sp|Q9D0B6|CX026_MOUSE UPF0368 protein Cxorf26 homolog OS=Mus musculus PE=2 SV=1;>sp|Q9D0B6-2|CX026_MOUSE Isoform 2 of UPF0368 protein Cxorf26 homolog OS=Mus musculus	3	1	1	1	0	0	0	0	1	0	1	1	1	0	0	0	0	0	0	0	1	0	1	1	1	0	0	0	0	0	0	0	1	0	1	1	1	0	0	0	5.1	5.1	5.1	22.223	198
B1AUY3;Q80Z68;B1AUY2;B1AUX5;E9Q5A5;E9PYS6;Q3TE27;F6SL55;E9Q4R3;F6YWG4	B1AUY3;Q80Z68;B1AUY2;B1AUX5;E9Q5A5;E9PYS6;Q3TE27;F6SL55		Arhgap4	>tr|B1AUY3|B1AUY3_MOUSE Protein Arhgap4 OS=Mus musculus GN=Arhgap4 PE=4 SV=1;>tr|Q80Z68|Q80Z68_MOUSE Protein Arhgap4 OS=Mus musculus GN=Arhgap4 PE=2 SV=1;>tr|B1AUY2|B1AUY2_MOUSE Protein Arhgap4 OS=Mus musculus GN=Arhgap4 PE=4 SV=1;>tr|B1AUX5|B1AUX5_MOUSE P	10	4	4	4	2	3	2	0	0	0	3	3	3	0	1	0	2	3	2	0	0	0	3	3	3	0	1	0	2	3	2	0	0	0	3	3	3	0	1	0	5.3	5.3	5.3	107.6	965
B1AV07;P51655;Q8R3X6;Q3V1C9;Q9R087	B1AV07;P51655	Glypican-4;Secreted glypican-4	Gpc4	>tr|B1AV07|B1AV07_MOUSE Glypican 4 OS=Mus musculus GN=Gpc4 PE=3 SV=1;>sp|P51655|GPC4_MOUSE Glypican-4 OS=Mus musculus GN=Gpc4 PE=2 SV=2	5	15	15	15	9	9	10	9	9	8	7	8	8	9	12	11	9	9	10	9	9	8	7	8	8	9	12	11	9	9	10	9	9	8	7	8	8	9	12	11	36.1	36.1	36.1	62.586	557
B1AV13;Q78IK4;E9PUP2;B1AV14	B1AV13;Q78IK4;E9PUP2;B1AV14	Apolipoprotein O-like	Apool	>tr|B1AV13|B1AV13_MOUSE Apolipoprotein O-like OS=Mus musculus GN=Apool PE=4 SV=1;>sp|Q78IK4|APOOL_MOUSE Apolipoprotein O-like OS=Mus musculus GN=Apool PE=2 SV=1;>tr|E9PUP2|E9PUP2_MOUSE Apolipoprotein O-like OS=Mus musculus GN=Apool PE=4 SV=1;>tr|B1AV14|B1A	4	17	17	17	12	14	13	13	12	13	14	13	15	12	13	14	12	14	13	13	12	13	14	13	15	12	13	14	12	14	13	13	12	13	14	13	15	12	13	14	74.3	74.3	74.3	29.26	265
B1AV37;Q9WVA2;Q4FZG7	B1AV37;Q9WVA2	Mitochondrial import inner membrane translocase subunit Tim8 A	Timm8a1	>tr|B1AV37|B1AV37_MOUSE MCG115064 OS=Mus musculus GN=Timm8a1 PE=4 SV=1;>sp|Q9WVA2|TIM8A_MOUSE Mitochondrial import inner membrane translocase subunit Tim8 A OS=Mus musculus GN=Timm8a1 PE=1 SV=1	3	6	6	6	3	3	3	1	1	2	5	6	5	2	2	3	3	3	3	1	1	2	5	6	5	2	2	3	3	3	3	1	1	2	5	6	5	2	2	3	91.8	91.8	91.8	11.042	97
B1AV40;O09111	B1AV40;O09111	NADH dehydrogenase [ubiquinone] 1 beta subcomplex subunit 11, mitochondrial	Ndufb11	>tr|B1AV40|B1AV40_MOUSE NADH dehydrogenase (Ubiquinone) 1 beta subcomplex, 11 OS=Mus musculus GN=Ndufb11 PE=4 SV=1;>sp|O09111|NDUBB_MOUSE NADH dehydrogenase [ubiquinone] 1 beta subcomplex subunit 11, mitochondrial OS=Mus musculus GN=Ndufb11 PE=1 SV=2	2	9	9	9	7	4	6	5	5	5	9	7	8	7	7	4	7	4	6	5	5	5	9	7	8	7	7	4	7	4	6	5	5	5	9	7	8	7	7	4	52.3	52.3	52.3	17.444	151
B1AV55;Q8R059;B1AV54;B1AV53	B1AV55;Q8R059	UDP-glucose 4-epimerase	Gale	>tr|B1AV55|B1AV55_MOUSE Galactose-4-epimerase, UDP OS=Mus musculus GN=Gale PE=3 SV=1;>sp|Q8R059|GALE_MOUSE UDP-glucose 4-epimerase OS=Mus musculus GN=Gale PE=2 SV=1	4	16	16	16	10	11	13	10	8	8	13	13	15	11	12	9	10	11	13	10	8	8	13	13	15	11	12	9	10	11	13	10	8	8	13	13	15	11	12	9	70.9	70.9	70.9	38.224	347
B1AV56;Q9WTL7	B1AV56;Q9WTL7	Acyl-protein thioesterase 2	Lypla2	>tr|B1AV56|B1AV56_MOUSE Lysophospholipase 2 OS=Mus musculus GN=Lypla2 PE=4 SV=1;>sp|Q9WTL7|LYPA2_MOUSE Acyl-protein thioesterase 2 OS=Mus musculus GN=Lypla2 PE=1 SV=1	2	7	7	7	2	6	3	4	3	3	5	5	4	4	4	5	2	6	3	4	3	3	5	5	4	4	4	5	2	6	3	4	3	3	5	5	4	4	4	5	45.5	45.5	45.5	24.794	231
B1AV60;B9EJX2;F7C917	B1AV60;B9EJX2;F7C917		Nhs	>tr|B1AV60|B1AV60_MOUSE Nance-Horan syndrome (Human) OS=Mus musculus GN=Nhs PE=4 SV=1;>tr|B9EJX2|B9EJX2_MOUSE Nance-Horan syndrome (Human) OS=Mus musculus GN=Nhs PE=2 SV=1;>tr|F7C917|F7C917_MOUSE Protein Nhs OS=Mus musculus GN=Nhs PE=4 SV=1	3	4	4	4	2	2	2	1	2	2	2	2	2	1	2	1	2	2	2	1	2	2	2	2	2	1	2	1	2	2	2	1	2	2	2	2	2	1	2	1	2.4	2.4	2.4	179.03	1647
B1AV67;Q8BR70;B1AV66;B1AV65	B1AV67;Q8BR70;B1AV66	Protein YIPF6	Yipf6	>tr|B1AV67|B1AV67_MOUSE Yip1 domain family, member 6 OS=Mus musculus GN=Yipf6 PE=4 SV=1;>sp|Q8BR70|YIPF6_MOUSE Protein YIPF6 OS=Mus musculus GN=Yipf6 PE=2 SV=1;>tr|B1AV66|B1AV66_MOUSE Protein YIPF6 (Fragment) OS=Mus musculus GN=Yipf6 PE=4 SV=1	4	4	4	4	2	3	4	2	2	3	3	3	3	2	4	3	2	3	4	2	2	3	3	3	3	2	4	3	2	3	4	2	2	3	3	3	3	2	4	3	16.5	16.5	16.5	26.087	236
B1AVA7;Q62277;F8WGK2;F6VR28	B1AVA7;Q62277;F8WGK2	Synaptophysin	Syp	>tr|B1AVA7|B1AVA7_MOUSE Synaptophysin OS=Mus musculus GN=Syp PE=4 SV=1;>sp|Q62277|SYPH_MOUSE Synaptophysin OS=Mus musculus GN=Syp PE=1 SV=2;>tr|F8WGK2|F8WGK2_MOUSE Synaptophysin OS=Mus musculus GN=Syp PE=4 SV=1	4	4	4	4	1	1	1	3	2	3	2	1	2	3	2	4	1	1	1	3	2	3	2	1	2	3	2	4	1	1	1	3	2	3	2	1	2	3	2	4	15.9	15.9	15.9	34.024	314
B1AVC8;Q8BGC0;Q8BGC0-2	B1AVC8;Q8BGC0	HIV Tat-specific factor 1 homolog	Htatsf1	>tr|B1AVC8|B1AVC8_MOUSE HIV TAT specific factor 1 OS=Mus musculus GN=Htatsf1 PE=4 SV=1;>sp|Q8BGC0|HTSF1_MOUSE HIV Tat-specific factor 1 homolog OS=Mus musculus GN=Htatsf1 PE=1 SV=1	3	21	21	21	16	16	16	4	6	6	18	16	18	7	5	3	16	16	16	4	6	6	18	16	18	7	5	3	16	16	16	4	6	6	18	16	18	7	5	3	33.9	33.9	33.9	86.239	757
B1AVD1;E9Q9J8;B1AVD2;Q8BU59	B1AVD1;E9Q9J8;B1AVD2;Q8BU59		Xpnpep2	>tr|B1AVD1|B1AVD1_MOUSE Protein Xpnpep2 OS=Mus musculus GN=Xpnpep2 PE=3 SV=1;>tr|E9Q9J8|E9Q9J8_MOUSE Protein Xpnpep2 OS=Mus musculus GN=Xpnpep2 PE=3 SV=1;>tr|B1AVD2|B1AVD2_MOUSE Protein Xpnpep2 OS=Mus musculus GN=Xpnpep2 PE=3 SV=1;>tr|Q8BU59|Q8BU59_MOUSE P	4	19	19	19	9	11	12	13	14	13	11	10	11	17	18	18	9	11	12	13	14	13	11	10	11	17	18	18	9	11	12	13	14	13	11	10	11	17	18	18	34.6	34.6	34.6	76.433	674
B1AVD3;Q8K352	B1AVD3;Q8K352	SAM and SH3 domain-containing protein 3	Sash3	>tr|B1AVD3|B1AVD3_MOUSE RIKEN cDNA 1200013B08 OS=Mus musculus GN=Sash3 PE=4 SV=1;>sp|Q8K352|SASH3_MOUSE SAM and SH3 domain-containing protein 3 OS=Mus musculus GN=Sash3 PE=2 SV=2	2	1	1	1	1	1	1	0	0	0	1	1	1	0	0	0	1	1	1	0	0	0	1	1	1	0	0	0	1	1	1	0	0	0	1	1	1	0	0	0	4.2	4.2	4.2	41.608	380
B1AVD4;P59268	B1AVD4;P59268	Palmitoyltransferase ZDHHC9	Zdhhc9	>tr|B1AVD4|B1AVD4_MOUSE Zinc finger, DHHC domain containing 9 OS=Mus musculus GN=Zdhhc9 PE=4 SV=1;>sp|P59268|ZDHC9_MOUSE Palmitoyltransferase ZDHHC9 OS=Mus musculus GN=Zdhhc9 PE=2 SV=1	2	6	6	5	3	3	2	6	4	5	2	3	3	6	6	5	3	3	2	6	4	5	2	3	3	6	6	5	2	2	1	5	3	4	1	2	2	5	5	4	23.4	23.4	20.3	40.939	364
B1AVH5;B1AVH4;Q8C0P5	B1AVH5;B1AVH4;Q8C0P5	Coronin-2A	Coro2a	>tr|B1AVH5|B1AVH5_MOUSE Coronin, actin binding protein 2A OS=Mus musculus GN=Coro2a PE=4 SV=1;>tr|B1AVH4|B1AVH4_MOUSE Coronin, actin binding protein 2A OS=Mus musculus GN=Coro2a PE=2 SV=1;>sp|Q8C0P5|COR2A_MOUSE Coronin-2A OS=Mus musculus GN=Coro2a PE=2 SV=	3	25	25	24	21	21	23	15	13	16	22	20	24	18	20	21	21	21	23	15	13	16	22	20	24	18	20	21	21	21	23	15	13	16	22	19	23	18	19	20	53.6	53.6	52.3	61.708	543
B1AVH7	B1AVH7	TBC1 domain family member 2A	Tbc1d2	>sp|B1AVH7|TBD2A_MOUSE TBC1 domain family member 2A OS=Mus musculus GN=Tbc1d2 PE=2 SV=1	1	4	4	4	2	2	3	0	1	0	3	2	4	1	2	1	2	2	3	0	1	0	3	2	4	1	2	1	2	2	3	0	1	0	3	2	4	1	2	1	5.1	5.1	5.1	104.26	922
B1AVP0;B1AVN8;A3KGD2;Q3UQ19;B1AVN9	B1AVP0;B1AVN8;A3KGD2;Q3UQ19;B1AVN9		Phactr2	>tr|B1AVP0|B1AVP0_MOUSE Phosphatase and actin regulator 2 OS=Mus musculus GN=Phactr2 PE=4 SV=1;>tr|B1AVN8|B1AVN8_MOUSE Phosphatase and actin regulator 2 OS=Mus musculus GN=Phactr2 PE=4 SV=1;>tr|A3KGD2|A3KGD2_MOUSE Phosphatase and actin regulator 2 OS=Mus m	5	2	2	2	2	1	2	0	0	0	1	1	1	0	0	0	2	1	2	0	0	0	1	1	1	0	0	0	2	1	2	0	0	0	1	1	1	0	0	0	4.6	4.6	4.6	69.248	632
B1AVW8;Q9D304	B1AVW8;Q9D304	E3 ubiquitin-protein ligase RNF128	Rnf128	>tr|B1AVW8|B1AVW8_MOUSE Ring finger protein 128 OS=Mus musculus GN=Rnf128 PE=4 SV=1;>sp|Q9D304|RN128_MOUSE E3 ubiquitin-protein ligase RNF128 OS=Mus musculus GN=Rnf128 PE=1 SV=1	2	8	8	3	5	7	6	7	6	8	5	4	4	8	7	7	5	7	6	7	6	8	5	4	4	8	7	7	2	2	2	2	3	3	1	0	0	3	2	2	18.2	18.2	7	46.276	428
B1AVZ0	B1AVZ0	Uracil phosphoribosyltransferase homolog	Uprt	>sp|B1AVZ0|UPP_MOUSE Uracil phosphoribosyltransferase homolog OS=Mus musculus GN=Uprt PE=2 SV=1	1	4	4	4	2	3	4	1	1	1	4	2	3	2	2	1	2	3	4	1	1	1	4	2	3	2	2	1	2	3	4	1	1	1	4	2	3	2	2	1	23.9	23.9	23.9	34.278	310
B1AVZ1;Q7TN29;Q7TN29-2	B1AVZ1;Q7TN29;Q7TN29-2	Stromal membrane-associated protein 2	Smap2	>tr|B1AVZ1|B1AVZ1_MOUSE Stromal membrane-associated GTPase-activating protein 2 OS=Mus musculus GN=Smap2 PE=4 SV=1;>sp|Q7TN29|SMAP2_MOUSE Stromal membrane-associated protein 2 OS=Mus musculus GN=Smap2 PE=1 SV=1;>sp|Q7TN29-2|SMAP2_MOUSE Isoform 2 of Stromal	3	5	4	4	4	4	3	2	1	2	4	4	3	2	0	2	3	3	2	1	0	1	3	3	2	1	0	1	3	3	2	1	0	1	3	3	2	1	0	1	18.9	17.1	17.1	46.577	428
B1AW58;Q8BW96;Q8BW96-2;Q3TDM2;B1AW57;Q8BW96-3	B1AW58;Q8BW96;Q8BW96-2;Q3TDM2;B1AW57;Q8BW96-3	Calcium/calmodulin-dependent protein kinase type 1D	Camk1d	>tr|B1AW58|B1AW58_MOUSE Calcium/calmodulin-dependent protein kinase ID OS=Mus musculus GN=Camk1d PE=2 SV=1;>sp|Q8BW96|KCC1D_MOUSE Calcium/calmodulin-dependent protein kinase type 1D OS=Mus musculus GN=Camk1d PE=1 SV=2;>sp|Q8BW96-2|KCC1D_MOUSE Isoform 2 of	6	14	14	12	11	11	12	4	2	4	11	8	10	5	6	6	11	11	12	4	2	4	11	8	10	5	6	6	9	9	10	3	0	3	9	7	8	4	5	4	42.3	42.3	37.9	42.918	385
B1AW86;P37172	B1AW86;P37172	Activin receptor type-1	Acvr1	>tr|B1AW86|B1AW86_MOUSE Activin A receptor type 1 OS=Mus musculus GN=Acvr1 PE=3 SV=1;>sp|P37172|ACVR1_MOUSE Activin receptor type-1 OS=Mus musculus GN=Acvr1 PE=2 SV=2	2	3	3	3	0	2	0	2	2	2	0	0	0	1	2	2	0	2	0	2	2	2	0	0	0	1	2	2	0	2	0	2	2	2	0	0	0	1	2	2	7.1	7.1	7.1	57.225	509
B1AWB9;O88207	B1AWB9;O88207	Collagen alpha-1(V) chain	Col5a1	>tr|B1AWB9|B1AWB9_MOUSE Collagen, type V, alpha 1 OS=Mus musculus GN=Col5a1 PE=2 SV=1;>sp|O88207|CO5A1_MOUSE Collagen alpha-1(V) chain OS=Mus musculus GN=Col5a1 PE=2 SV=2	2	4	4	4	4	2	4	0	1	1	3	4	4	0	0	0	4	2	4	0	1	1	3	4	4	0	0	0	4	2	4	0	1	1	3	4	4	0	0	0	3.2	3.2	3.2	183.67	1838
B1AWD5;Q9CYL5;B1AWD6	B1AWD5;Q9CYL5	Golgi-associated plant pathogenesis-related protein 1	Glipr2	>tr|B1AWD5|B1AWD5_MOUSE GLI pathogenesis-related 2 OS=Mus musculus GN=Glipr2 PE=4 SV=1;>sp|Q9CYL5|GAPR1_MOUSE Golgi-associated plant pathogenesis-related protein 1 OS=Mus musculus GN=Glipr2 PE=2 SV=3	3	8	8	8	3	4	5	6	4	6	2	3	2	7	6	8	3	4	5	6	4	6	2	3	2	7	6	8	3	4	5	6	4	6	2	3	2	7	6	8	87	87	87	17.09	154
B1AWL1;P52483;B2FDH0;Q91W82;P52482;Q541Z5;D3YXD1;H3BL69;H3BL23;H3BKX9;D3YW10;B2FDH7	B1AWL1;P52483;B2FDH0;Q91W82;P52482;Q541Z5;D3YXD1;H3BL69;H3BL23	Ubiquitin-conjugating enzyme E2 E3;Ubiquitin-conjugating enzyme E2 E2;Ubiquitin-conjugating enzyme E2 E1	Ube2e3;Ube2e2;Ube2e1	>tr|B1AWL1|B1AWL1_MOUSE MCG12442 OS=Mus musculus GN=Ube2e3 PE=3 SV=1;>sp|P52483|UB2E3_MOUSE Ubiquitin-conjugating enzyme E2 E3 OS=Mus musculus GN=Ube2e3 PE=1 SV=2;>tr|B2FDH0|B2FDH0_MOUSE Ubiquitin-conjugating enzyme E2 E3 (Fragment) OS=Mus musculus GN=Ube2	12	4	4	4	3	4	3	1	2	1	2	2	4	1	2	2	3	4	3	1	2	1	2	2	4	1	2	2	3	4	3	1	2	1	2	2	4	1	2	2	30.9	30.9	30.9	22.912	207
B1AWM8;Q8BIL5;Q8BIL5-2;Q8BJ23	B1AWM8;Q8BIL5;Q8BIL5-2	Protein Hook homolog 1	Hook1	>tr|B1AWM8|B1AWM8_MOUSE Hook homolog 1 (Drosophila) OS=Mus musculus GN=Hook1 PE=4 SV=1;>sp|Q8BIL5|HOOK1_MOUSE Protein Hook homolog 1 OS=Mus musculus GN=Hook1 PE=1 SV=2;>sp|Q8BIL5-2|HOOK1_MOUSE Isoform 2 of Protein Hook homolog 1 OS=Mus musculus GN=Hook1	4	26	26	26	18	18	17	11	7	14	18	18	17	11	12	12	18	18	17	11	7	14	18	18	17	11	12	12	18	18	17	11	7	14	18	18	17	11	12	12	45.2	45.2	45.2	84.438	728
B1AWN4;Q8BZU5	B1AWN4		Atp10b	>tr|B1AWN4|B1AWN4_MOUSE ATPase, class V, type 10B OS=Mus musculus GN=Atp10b PE=4 SV=1	2	7	7	6	5	5	5	3	3	5	5	4	5	7	5	5	5	5	5	3	3	5	5	4	5	7	5	5	4	4	4	2	2	4	4	3	4	6	4	4	5	5	3.8	166.44	1474
B1AWS8;B1AWS9;Q02858;Q80YS4	B1AWS8;B1AWS9;Q02858;Q80YS4	Angiopoietin-1 receptor	Tek	>tr|B1AWS8|B1AWS8_MOUSE Angiopoietin-1 receptor OS=Mus musculus GN=Tek PE=4 SV=1;>tr|B1AWS9|B1AWS9_MOUSE Endothelial-specific receptor tyrosine kinase OS=Mus musculus GN=Tek PE=4 SV=1;>sp|Q02858|TIE2_MOUSE Angiopoietin-1 receptor OS=Mus musculus GN=Tek PE=	4	2	2	2	1	1	1	2	1	0	1	1	1	2	2	2	1	1	1	2	1	0	1	1	1	2	2	2	1	1	1	2	1	0	1	1	1	2	2	2	2.3	2.3	2.3	125.8	1123
B1AWT3;Q7TT45;B1AWT2;B1AWT4;Q8BGS5;Q3TQC3	B1AWT3;Q7TT45;B1AWT2;B1AWT4	Ras-related GTP-binding protein D	Rragd	>tr|B1AWT3|B1AWT3_MOUSE Ras-related GTP binding D OS=Mus musculus GN=Rragd PE=4 SV=1;>sp|Q7TT45|RRAGD_MOUSE Ras-related GTP-binding protein D OS=Mus musculus GN=Rragd PE=2 SV=2;>tr|B1AWT2|B1AWT2_MOUSE Ras-related GTP binding D OS=Mus musculus GN=Rragd PE=4	6	12	3	3	5	8	6	7	6	9	7	6	8	7	8	8	1	3	1	2	2	2	2	0	2	1	1	2	1	3	1	2	2	2	2	0	2	1	1	2	27.8	7.5	7.5	51.802	454
B1AWX7;Q9CZS1;G3UYH1	B1AWX7;Q9CZS1	Aldehyde dehydrogenase X, mitochondrial	Aldh1b1	>tr|B1AWX7|B1AWX7_MOUSE Aldehyde dehydrogenase 1 family, member B1 OS=Mus musculus GN=Aldh1b1 PE=3 SV=1;>sp|Q9CZS1|AL1B1_MOUSE Aldehyde dehydrogenase X, mitochondrial OS=Mus musculus GN=Aldh1b1 PE=2 SV=1	3	37	37	32	33	35	34	30	26	29	33	33	34	31	34	34	33	35	34	30	26	29	33	33	34	31	34	34	28	30	29	25	22	25	28	29	30	27	29	29	73.8	73.8	70.3	57.552	519
B1AX58;Q99K51	B1AX58;Q99K51	Plastin-3	Pls3	>tr|B1AX58|B1AX58_MOUSE Plastin 3 (T-isoform) OS=Mus musculus GN=Pls3 PE=4 SV=1;>sp|Q99K51|PLST_MOUSE Plastin-3 OS=Mus musculus GN=Pls3 PE=1 SV=3	2	9	2	2	8	9	8	7	6	7	8	8	8	7	7	7	1	2	1	0	0	1	1	1	1	1	0	0	1	2	1	0	0	1	1	1	1	1	0	0	15.3	5.8	5.8	71.745	639
B1AX96;O54788	B1AX96;O54788	DNA fragmentation factor subunit beta	Dffb	>tr|B1AX96|B1AX96_MOUSE DNAation factor, beta subunit OS=Mus musculus GN=Dffb PE=4 SV=1;>sp|O54788|DFFB_MOUSE DNA fragmentation factor subunit beta OS=Mus musculus GN=Dffb PE=1 SV=1	2	2	2	2	1	0	1	0	0	0	2	0	2	0	0	0	1	0	1	0	0	0	2	0	2	0	0	0	1	0	1	0	0	0	2	0	2	0	0	0	8.1	8.1	8.1	39.449	344
B1AXB8;Q6NVE8;Q6NVE8-2	B1AXB8;Q6NVE8;Q6NVE8-2	WD repeat-containing protein 44	Wdr44	>tr|B1AXB8|B1AXB8_MOUSE WD repeat domain 44 OS=Mus musculus GN=Wdr44 PE=4 SV=1;>sp|Q6NVE8|WDR44_MOUSE WD repeat-containing protein 44 OS=Mus musculus GN=Wdr44 PE=1 SV=1;>sp|Q6NVE8-2|WDR44_MOUSE Isoform 2 of WD repeat-containing protein 44 OS=Mus musculus G	3	14	14	14	7	6	6	2	2	2	7	6	6	3	4	3	7	6	6	2	2	2	7	6	6	3	4	3	7	6	6	2	2	2	7	6	6	3	4	3	19.9	19.9	19.9	101.55	915
B1AXC9;Q8K2Q5;B1AXC8;B1AXC5;B1AXC7;Q3TFT3	B1AXC9;Q8K2Q5;B1AXC8	Coiled-coil-helix-coiled-coil-helix domain-containing protein 7	Chchd7	>tr|B1AXC9|B1AXC9_MOUSE Coiled-coil-helix-coiled-coil-helix domain containing 7 OS=Mus musculus GN=Chchd7 PE=4 SV=1;>sp|Q8K2Q5|CHCH7_MOUSE Coiled-coil-helix-coiled-coil-helix domain-containing protein 7 OS=Mus musculus GN=Chchd7 PE=2 SV=1;>tr|B1AXC8|B1AXC8	6	6	6	6	6	5	6	5	5	4	6	6	6	5	3	4	6	5	6	5	5	4	6	6	6	5	3	4	6	5	6	5	5	4	6	6	6	5	3	4	69.4	69.4	69.4	10.101	85
B1AXH8;Q3UQX8;B1AXH9;Q61909	B1AXH8;Q3UQX8;B1AXH9;Q61909	Protein CBFA2T1	Runx1t1	>tr|B1AXH8|B1AXH8_MOUSE Protein CBFA2T1 OS=Mus musculus GN=Runx1t1 PE=4 SV=1;>tr|Q3UQX8|Q3UQX8_MOUSE Protein CBFA2T1 OS=Mus musculus GN=Runx1t1 PE=2 SV=1;>tr|B1AXH9|B1AXH9_MOUSE Runt-related transcription factor 1; translocated to, 1 (Cyclin D-related) OS=	4	1	1	1	1	1	1	1	1	1	1	1	1	1	1	1	1	1	1	1	1	1	1	1	1	1	1	1	1	1	1	1	1	1	1	1	1	1	1	1	1.5	1.5	1.5	67.508	604
B1AXJ8;Q8BM39;Q8BM39-2	B1AXJ8;Q8BM39;Q8BM39-2	Pre-mRNA-splicing factor 18	Prpf18	>tr|B1AXJ8|B1AXJ8_MOUSE PRP18 pre-mRNA processing factor 18 homolog (Yeast) OS=Mus musculus GN=Prpf18 PE=4 SV=1;>sp|Q8BM39|PRP18_MOUSE Pre-mRNA-splicing factor 18 OS=Mus musculus GN=Prpf18 PE=1 SV=1;>sp|Q8BM39-2|PRP18_MOUSE Isoform 2 of Pre-mRNA-splicing f	3	2	2	2	2	1	1	0	0	0	1	1	1	0	1	0	2	1	1	0	0	0	1	1	1	0	1	0	2	1	1	0	0	0	1	1	1	0	1	0	7	7	7	39.889	342
B1AXK9;Q9D136	B1AXK9;Q9D136	PKHD domain-containing transmembrane protein C17orf101 homolog	1110031I02Rik	>tr|B1AXK9|B1AXK9_MOUSE Novel protein OS=Mus musculus GN=1110031I02Rik PE=4 SV=1;>sp|Q9D136|CQ101_MOUSE PKHD domain-containing transmembrane protein C17orf101 homolog OS=Mus musculus PE=2 SV=1	2	9	9	9	4	5	6	3	3	2	6	7	7	5	5	3	4	5	6	3	3	2	6	7	7	5	5	3	4	5	6	3	3	2	6	7	7	5	5	3	38.1	38.1	38.1	35.384	315
B1AXP1;Q8BMJ3;D3Z367	B1AXP1;Q8BMJ3	Eukaryotic translation initiation factor 1A, X-chromosomal	Eif1ax;Eif1ay	>tr|B1AXP1|B1AXP1_MOUSE Eukaryotic translation initiation factor 1A, Y-linked OS=Mus musculus GN=Eif1ax PE=3 SV=1;>sp|Q8BMJ3|IF1AX_MOUSE Eukaryotic translation initiation factor 1A, X-chromosomal OS=Mus musculus GN=Eif1ax PE=2 SV=3	3	8	8	4	6	8	7	4	4	4	6	8	8	5	3	3	6	8	7	4	4	4	6	8	8	5	3	3	2	4	3	1	1	3	2	4	4	2	2	1	56.2	56.2	30.6	16.46	144
B1AXP6-4;B1AXP6-3;B1AXP6;B1AXP6-2	B1AXP6-4;B1AXP6-3;B1AXP6;B1AXP6-2	Mitochondrial import receptor subunit TOM5 homolog	Tomm5	>sp|B1AXP6-4|TOM5_MOUSE Isoform 4 of Mitochondrial import receptor subunit TOM5 homolog OS=Mus musculus GN=Tomm5;>sp|B1AXP6-3|TOM5_MOUSE Isoform 3 of Mitochondrial import receptor subunit TOM5 homolog OS=Mus musculus GN=Tomm5;>sp|B1AXP6|TOM5_MOUSE Mitochon	4	5	5	5	3	5	5	5	4	5	4	4	4	5	5	5	3	5	5	5	4	5	4	4	4	5	5	5	3	5	5	5	4	5	4	4	4	5	5	5	26	26	26	11.974	104
B1AXW7;P35700;B1AXW6;B1AXW5;G3UW54;B1AXW4	B1AXW7;P35700;B1AXW6;B1AXW5;G3UW54;B1AXW4	Peroxiredoxin-1	Prdx1;Gm7204	>tr|B1AXW7|B1AXW7_MOUSE MCG19655 OS=Mus musculus GN=Prdx1 PE=4 SV=1;>sp|P35700|PRDX1_MOUSE Peroxiredoxin-1 OS=Mus musculus GN=Prdx1 PE=1 SV=1;>tr|B1AXW6|B1AXW6_MOUSE Peroxiredoxin 1 (Fragment) OS=Mus musculus GN=Prdx1 PE=4 SV=1;>tr|B1AXW5|B1AXW5_MOUSE Pero	6	21	21	18	19	19	20	15	15	16	20	21	21	19	18	18	19	19	20	15	15	16	20	21	21	19	18	18	16	16	17	13	12	13	17	18	18	16	15	15	75.9	75.9	75.9	22.176	199
B1AXY3;Q3UKJ7;Q3UKJ7-2	B1AXY3;Q3UKJ7;Q3UKJ7-2	WD40 repeat-containing protein SMU1	Smu1	>tr|B1AXY3|B1AXY3_MOUSE Smu-1 suppressor of mec-8 and unc-52 homolog (C. elegans) OS=Mus musculus GN=Smu1 PE=4 SV=1;>sp|Q3UKJ7|SMU1_MOUSE WD40 repeat-containing protein SMU1 OS=Mus musculus GN=Smu1 PE=2 SV=2;>sp|Q3UKJ7-2|SMU1_MOUSE Isoform 2 of WD40 repeat	3	17	17	17	9	7	7	4	4	5	10	13	11	7	3	4	9	7	7	4	4	5	10	13	11	7	3	4	9	7	7	4	4	5	10	13	11	7	3	4	40.7	40.7	40.7	57.543	513
B1AY07;Q9D7S9	B1AY07;Q9D7S9	Charged multivesicular body protein 5	Chmp5	>tr|B1AY07|B1AY07_MOUSE Chromatin modifying protein 5 OS=Mus musculus GN=Chmp5 PE=4 SV=1;>sp|Q9D7S9|CHMP5_MOUSE Charged multivesicular body protein 5 OS=Mus musculus GN=Chmp5 PE=2 SV=1	2	6	6	6	3	4	4	2	1	2	4	5	5	3	3	3	3	4	4	2	1	2	4	5	5	3	3	3	3	4	4	2	1	2	4	5	5	3	3	3	42.9	42.9	42.9	24.575	219
B1AY76;Q9D1Q6	B1AY76;Q9D1Q6	Endoplasmic reticulum resident protein 44	Erp44	>tr|B1AY76|B1AY76_MOUSE Thioredoxin domain containing 4 (Endoplasmic reticulum) OS=Mus musculus GN=Erp44 PE=4 SV=1;>sp|Q9D1Q6|ERP44_MOUSE Endoplasmic reticulum resident protein 44 OS=Mus musculus GN=Erp44 PE=1 SV=1	2	26	26	25	21	22	24	16	15	15	23	22	24	20	18	21	21	22	24	16	15	15	23	22	24	20	18	21	20	21	23	15	14	15	22	21	23	19	18	21	73.2	73.2	73.2	46.852	406
B1AY78;Q8CF93-2;A2RRI8;Q8CF93	B1AY78;Q8CF93-2;A2RRI8;Q8CF93	Polypeptide N-acetylgalactosaminyltransferase 13	Galnt13	>tr|B1AY78|B1AY78_MOUSE UDP-N-acetyl-alpha-D-galactosamine: polypeptide N-acetylgalactosaminyltransferase 13 OS=Mus musculus GN=Galnt13 PE=3 SV=1;>sp|Q8CF93-2|GLT13_MOUSE Isoform 2 of Polypeptide N-acetylgalactosaminyltransferase 13 OS=Mus musculus GN=Galn	4	7	1	1	3	5	5	3	5	3	6	5	6	5	5	6	0	0	0	0	1	1	0	1	0	1	1	0	0	0	0	0	1	1	0	1	0	1	1	0	9.8	1.2	1.2	67.795	592
B1AYG5;Q9Z0T9;B1AYG6;B1AYG7	B1AYG5;Q9Z0T9;B1AYG6;B1AYG7	Integrin beta;Integrin beta-6	Itgb6	>tr|B1AYG5|B1AYG5_MOUSE Integrin beta OS=Mus musculus GN=Itgb6 PE=3 SV=1;>sp|Q9Z0T9|ITB6_MOUSE Integrin beta-6 OS=Mus musculus GN=Itgb6 PE=2 SV=1;>tr|B1AYG6|B1AYG6_MOUSE Integrin beta OS=Mus musculus GN=Itgb6 PE=3 SV=1;>tr|B1AYG7|B1AYG7_MOUSE Integrin beta	4	8	7	7	5	5	7	6	7	7	3	5	5	6	6	6	4	4	6	5	6	6	2	4	5	5	5	5	4	4	6	5	6	6	2	4	5	5	5	5	12.2	11.1	11.1	86.041	787
B1AYJ9	B1AYJ9		Ola1	>tr|B1AYJ9|B1AYJ9_MOUSE Obg-like ATPase 1 OS=Mus musculus GN=Ola1 PE=4 SV=1	1	12	1	1	7	7	10	4	5	4	11	10	9	4	3	4	1	1	1	1	1	1	1	1	1	1	1	1	1	1	1	1	1	1	1	1	1	1	1	1	43.8	2.5	2.5	31.711	281
B1AYL1	B1AYL1		Scn7a	>tr|B1AYL1|B1AYL1_MOUSE Protein Scn7a OS=Mus musculus GN=Scn7a PE=3 SV=1	1	14	14	14	5	7	5	8	7	8	6	5	5	10	10	10	5	7	5	8	7	8	6	5	5	10	10	10	5	7	5	8	7	8	6	5	5	10	10	10	9.8	9.8	9.8	192.18	1681
B1AYS9;Q8C0V0;B1ASU9;O55047;O55047-3;E9Q1W5	B1AYS9;Q8C0V0;B1ASU9;O55047;O55047-3	Serine/threonine-protein kinase tousled-like 1;Serine/threonine-protein kinase tousled-like 2	Tlk1;Tlk2	>tr|B1AYS9|B1AYS9_MOUSE Tousled-like kinase 1 OS=Mus musculus GN=Tlk1 PE=4 SV=1;>sp|Q8C0V0|TLK1_MOUSE Serine/threonine-protein kinase tousled-like 1 OS=Mus musculus GN=Tlk1 PE=2 SV=2;>tr|B1ASU9|B1ASU9_MOUSE Serine/threonine-protein kinase tousled-like 2 OS	6	3	2	2	3	3	3	1	1	1	3	3	2	1	1	1	2	2	2	0	0	0	2	2	1	0	0	0	2	2	2	0	0	0	2	2	1	0	0	0	5.4	4.3	4.3	86.622	766
B1AYU5;Q8C5N3;B1AYU7;B1AYU6;Q8C5N3-2;B1AYU4;A2AK42;A2AK44;B1AYU8;B1AYU9	B1AYU5;Q8C5N3;B1AYU7;B1AYU6;Q8C5N3-2;B1AYU4;A2AK42;A2AK44	Pre-mRNA-splicing factor CWC22 homolog	Cwc22;OTTMUSG00000013393;Gm13695	>tr|B1AYU5|B1AYU5_MOUSE Novel protein OS=Mus musculus GN=Cwc22 PE=4 SV=1;>sp|Q8C5N3|CWC22_MOUSE Pre-mRNA-splicing factor CWC22 homolog OS=Mus musculus GN=Cwc22 PE=1 SV=1;>tr|B1AYU7|B1AYU7_MOUSE Novel protein OS=Mus musculus GN=Cwc22 PE=4 SV=1;>tr|B1AYU6|B1	10	12	12	12	5	4	7	2	3	2	5	7	3	3	2	1	5	4	7	2	3	2	5	7	3	3	2	1	5	4	7	2	3	2	5	7	3	3	2	1	13.7	13.7	13.7	104.77	908
B1AZ14;Q3UMF0-2;B1AZ15;D3Z6S2;B1AZ10;Q3UMF0-4;E9QPU9;Q3UMF0;B1AZ11;Q3UMF0-3;B1AZ26	B1AZ14;Q3UMF0-2;B1AZ15;D3Z6S2;B1AZ10;Q3UMF0-4;E9QPU9;Q3UMF0;B1AZ11;Q3UMF0-3	Cordon-bleu protein-like 1	Cobll1	>tr|B1AZ14|B1AZ14_MOUSE Cobl-like 1 OS=Mus musculus GN=Cobll1 PE=4 SV=1;>sp|Q3UMF0-2|COBL1_MOUSE Isoform 2 of Cordon-bleu protein-like 1 OS=Mus musculus GN=Cobll1;>tr|B1AZ15|B1AZ15_MOUSE Cobl-like 1 OS=Mus musculus GN=Cobll1 PE=4 SV=1;>tr|D3Z6S2|D3Z6S2_MOU	11	9	9	9	8	6	9	2	2	3	6	7	7	1	3	2	8	6	9	2	2	3	6	7	7	1	3	2	8	6	9	2	2	3	6	7	7	1	3	2	10.6	10.6	10.6	133.37	1241
B1AZ39;P0C0A3;B1AZ42;B1AZ41	B1AZ39;P0C0A3	Charged multivesicular body protein 6	Chmp6	>tr|B1AZ39|B1AZ39_MOUSE Chromatin modifying protein 6 OS=Mus musculus GN=Chmp6 PE=2 SV=1;>sp|P0C0A3|CHMP6_MOUSE Charged multivesicular body protein 6 OS=Mus musculus GN=Chmp6 PE=2 SV=2	4	7	7	7	6	5	6	6	6	6	5	4	6	7	7	7	6	5	6	6	6	6	5	4	6	7	7	7	6	5	6	6	6	6	5	4	6	7	7	7	32	32	32	23.415	200
B1AZI6;E9Q5E2;Q8C690;F6RBN0;F6SBF2;F6VK25;B8A4C2;B1AZI7;F6W2C7	B1AZI6	THO complex subunit 2	Thoc2	>sp|B1AZI6|THOC2_MOUSE THO complex subunit 2 OS=Mus musculus GN=Thoc2 PE=3 SV=1	9	20	20	20	8	8	11	5	0	2	12	11	17	5	6	6	8	8	11	5	0	2	12	11	17	5	6	6	8	8	11	5	0	2	12	11	17	5	6	6	15.4	15.4	15.4	182.77	1594
B1AZK3;P70349;B0R1E3	B1AZK3;P70349;B0R1E3	Histidine triad nucleotide-binding protein 1	Hint1	>tr|B1AZK3|B1AZK3_MOUSE Histidine triad nucleotide binding protein OS=Mus musculus GN=Hint1 PE=4 SV=1;>sp|P70349|HINT1_MOUSE Histidine triad nucleotide-binding protein 1 OS=Mus musculus GN=Hint1 PE=1 SV=3;>tr|B0R1E3|B0R1E3_MOUSE Histidine triad nucleotide	3	6	6	6	4	4	4	3	2	4	5	4	5	4	4	4	4	4	4	3	2	4	5	4	5	4	4	4	4	4	4	3	2	4	5	4	5	4	4	4	58.7	58.7	58.7	13.777	126
B1AZP2;B1AZP2-2;B7ZNS2;B1AZP2-3;E9PUF2;F6YMR0;I1E4X0;H3BJD4;H3BJW9	B1AZP2;B1AZP2-2;B7ZNS2;B1AZP2-3;E9PUF2;F6YMR0;I1E4X0;H3BJD4	Disks large-associated protein 4	Dlgap4	>sp|B1AZP2|DLGP4_MOUSE Disks large-associated protein 4 OS=Mus musculus GN=Dlgap4 PE=1 SV=1;>sp|B1AZP2-2|DLGP4_MOUSE Isoform 2 of Disks large-associated protein 4 OS=Mus musculus GN=Dlgap4;>tr|B7ZNS2|B7ZNS2_MOUSE Disks large-associated protein 4 OS=Mus mus	9	3	3	3	1	3	2	1	1	0	2	2	1	0	0	0	1	3	2	1	1	0	2	2	1	0	0	0	1	3	2	1	1	0	2	2	1	0	0	0	3.8	3.8	3.8	108.04	992
B1AZQ7;Q9CQ82;Q9CQ82-2	B1AZQ7;Q9CQ82;Q9CQ82-2	Centromere protein R	Itgb3bp	>tr|B1AZQ7|B1AZQ7_MOUSE Integrin beta 3 binding protein (Beta3-endonexin) OS=Mus musculus GN=Itgb3bp PE=4 SV=1;>sp|Q9CQ82|CENPR_MOUSE Centromere protein R OS=Mus musculus GN=Itgb3bp PE=2 SV=1;>sp|Q9CQ82-2|CENPR_MOUSE Isoform 2 of Centromere protein R OS=Mu	3	1	1	1	0	1	0	0	0	0	1	1	1	0	0	0	0	1	0	0	0	0	1	1	1	0	0	0	0	1	0	0	0	0	1	1	1	0	0	0	6.2	6.2	6.2	20.026	176
B1AZT0;P47746	B1AZT0;P47746	Cannabinoid receptor 1	Cnr1	>tr|B1AZT0|B1AZT0_MOUSE Cannabinoid receptor 1 (Brain) OS=Mus musculus GN=Cnr1 PE=3 SV=1;>sp|P47746|CNR1_MOUSE Cannabinoid receptor 1 OS=Mus musculus GN=Cnr1 PE=2 SV=1	2	2	2	2	1	2	2	2	2	1	1	1	1	1	1	1	1	2	2	2	2	1	1	1	1	1	1	1	1	2	2	2	2	1	1	1	1	1	1	1	4	4	4	52.83	473
B1B030;Q9CZG9	B1B030;Q9CZG9	PDZ domain-containing protein 11	Pdzd11	>tr|B1B030|B1B030_MOUSE PDZ domain containing 11 OS=Mus musculus GN=Pdzd11 PE=4 SV=1;>sp|Q9CZG9|PDZ11_MOUSE PDZ domain-containing protein 11 OS=Mus musculus GN=Pdzd11 PE=1 SV=1	2	6	6	6	4	3	5	1	0	2	3	3	5	1	0	0	4	3	5	1	0	2	3	3	5	1	0	0	4	3	5	1	0	2	3	3	5	1	0	0	58.6	58.6	58.6	16.182	140
B1B079;Q3TIV5;Q3TIV5-2;Q3TIV5-3	B1B079;Q3TIV5;Q3TIV5-2	Zinc finger CCCH domain-containing protein 15	Zc3h15	>tr|B1B079|B1B079_MOUSE RIKEN cDNA 2610312B22 OS=Mus musculus GN=Zc3h15 PE=4 SV=1;>sp|Q3TIV5|ZC3HF_MOUSE Zinc finger CCCH domain-containing protein 15 OS=Mus musculus GN=Zc3h15 PE=1 SV=2;>sp|Q3TIV5-2|ZC3HF_MOUSE Isoform 2 of Zinc finger CCCH domain-contain	4	14	14	14	8	8	11	3	1	2	7	11	10	2	1	2	8	8	11	3	1	2	7	11	10	2	1	2	8	8	11	3	1	2	7	11	10	2	1	2	37.3	37.3	37.3	48.327	426
B1B0E8;Q62377;E9QKR6;B1B0E9;B1B0F0;B1B0F1	B1B0E8;Q62377;E9QKR6;B1B0E9;B1B0F0;B1B0F1	U2 small nuclear ribonucleoprotein auxiliary factor 35 kDa subunit-related protein 2	Zrsr2	>tr|B1B0E8|B1B0E8_MOUSE U2 small nuclear ribonucleoprotein auxiliary factor 35 kDa subunit-related protein 2 OS=Mus musculus GN=Zrsr2 PE=4 SV=1;>sp|Q62377|U2AFM_MOUSE U2 small nuclear ribonucleoprotein auxiliary factor 35 kDa subunit-related protein 2 OS=M	6	2	2	2	1	2	2	0	0	0	2	2	2	0	0	0	1	2	2	0	0	0	2	2	2	0	0	0	1	2	2	0	0	0	2	2	2	0	0	0	3.9	3.9	3.9	64.448	541
B1B0I4;Q8VCH6	B1B0I4;Q8VCH6	Delta(24)-sterol reductase	Dhcr24	>tr|B1B0I4|B1B0I4_MOUSE 24-dehydrocholesterol reductase OS=Mus musculus GN=Dhcr24 PE=4 SV=1;>sp|Q8VCH6|DHC24_MOUSE Delta(24)-sterol reductase OS=Mus musculus GN=Dhcr24 PE=2 SV=1	2	10	10	10	6	8	8	5	5	6	8	7	7	6	7	7	6	8	8	5	5	6	8	7	7	6	7	7	6	8	8	5	5	6	8	7	7	6	7	7	23.1	23.1	23.1	60.112	516
B1B0W8;P00493	B1B0W8;P00493	Hypoxanthine-guanine phosphoribosyltransferase	Hprt;Hprt1	>tr|B1B0W8|B1B0W8_MOUSE Hypoxanthine guanine phosphoribosyl transferase 1 OS=Mus musculus GN=Hprt PE=4 SV=1;>sp|P00493|HPRT_MOUSE Hypoxanthine-guanine phosphoribosyltransferase OS=Mus musculus GN=Hprt1 PE=1 SV=3	2	14	14	14	9	11	11	8	5	7	14	10	11	8	7	10	9	11	11	8	5	7	14	10	11	8	7	10	9	11	11	8	5	7	14	10	11	8	7	10	91.7	91.7	91.7	24.57	218
B1B0Y7;Q8VEL0	B1B0Y7;Q8VEL0	Motile sperm domain-containing protein 1	Mospd1	>tr|B1B0Y7|B1B0Y7_MOUSE Motile sperm domain containing 1 OS=Mus musculus GN=Mospd1 PE=4 SV=1;>sp|Q8VEL0|MSPD1_MOUSE Motile sperm domain-containing protein 1 OS=Mus musculus GN=Mospd1 PE=2 SV=1	2	1	1	1	1	0	1	0	0	0	1	1	1	1	1	0	1	0	1	0	0	0	1	1	1	1	1	0	1	0	1	0	0	0	1	1	1	1	1	0	8.5	8.5	8.5	24.074	213
B1B185;Q9D309	B1B185;Q9D309	Protein FAM3B	Fam3b	>tr|B1B185|B1B185_MOUSE Open reading frame 9 OS=Mus musculus GN=Fam3b PE=4 SV=1;>sp|Q9D309|FAM3B_MOUSE Protein FAM3B OS=Mus musculus GN=Fam3b PE=1 SV=1	2	15	15	15	10	11	10	9	11	10	11	11	11	12	14	13	10	11	10	9	11	10	11	11	11	12	14	13	10	11	10	9	11	10	11	11	11	12	14	13	71.9	71.9	71.9	26.152	235
B1B195;P58196	B1B195;P58196	Phospholipid scramblase 4	Plscr4	>tr|B1B195|B1B195_MOUSE Phospholipid scramblase 4 OS=Mus musculus GN=Plscr4 PE=4 SV=1;>sp|P58196|PLS4_MOUSE Phospholipid scramblase 4 OS=Mus musculus GN=Plscr4 PE=2 SV=2	2	3	3	3	1	1	0	3	2	1	1	1	0	2	1	1	1	1	0	3	2	1	1	1	0	2	1	1	1	1	0	3	2	1	1	1	0	2	1	1	7.4	7.4	7.4	36.579	326
B1B1A2;Q8BUN5;A2CG44;A2CG45	B1B1A2;Q8BUN5;A2CG44	Mothers against decapentaplegic homolog 3	Smad3	>tr|B1B1A2|B1B1A2_MOUSE MAD homolog 3 (Drosophila) OS=Mus musculus GN=Smad3 PE=4 SV=1;>sp|Q8BUN5|SMAD3_MOUSE Mothers against decapentaplegic homolog 3 OS=Mus musculus GN=Smad3 PE=1 SV=2;>tr|A2CG44|A2CG44_MOUSE MAD homolog 3 (Drosophila) (Fragment) OS=Mus m	4	7	3	3	7	6	7	4	2	3	7	7	5	5	7	5	3	2	3	1	1	1	3	3	2	2	3	2	3	2	3	1	1	1	3	3	2	2	3	2	21.6	10.6	10.6	48.08	425
B1B1A8;Q6PDN3;Q6PDN3-3;Q6PDN3-2;B0LY41;Q3UIZ8;Q3UIZ8-2;D3Z630;D3Z4L6;Q8VCR8;F8WIP5;Q5SUV5;F6V672;O08911;Q9WUI1	B1B1A8;Q6PDN3;Q6PDN3-3;Q6PDN3-2	Myosin light chain kinase, smooth muscle;Myosin light chain kinase, smooth muscle, deglutamylated form	Mylk	>tr|B1B1A8|B1B1A8_MOUSE Myosin light chain kinase, smooth muscle OS=Mus musculus GN=Mylk PE=2 SV=1;>sp|Q6PDN3|MYLK_MOUSE Myosin light chain kinase, smooth muscle OS=Mus musculus GN=Mylk PE=1 SV=3;>sp|Q6PDN3-3|MYLK_MOUSE Isoform 3 of Myosin light chain kina	15	35	35	29	24	28	29	12	8	17	26	29	28	18	21	22	24	28	29	12	8	17	26	29	28	18	21	22	21	23	24	9	6	14	22	24	22	15	17	18	22.2	22.2	18.4	213.61	1950
B1B1B4;Q99LC5	B1B1B4;Q99LC5	Electron transfer flavoprotein subunit alpha, mitochondrial	Etfa	>tr|B1B1B4|B1B1B4_MOUSE Electron transferring flavoprotein, alpha polypeptide OS=Mus musculus GN=Etfa PE=4 SV=1;>sp|Q99LC5|ETFA_MOUSE Electron transfer flavoprotein subunit alpha, mitochondrial OS=Mus musculus GN=Etfa PE=1 SV=2	2	23	23	23	17	18	18	20	17	20	21	22	22	21	22	22	17	18	18	20	17	20	21	22	22	21	22	22	17	18	18	20	17	20	21	22	22	21	22	22	77.5	77.5	77.5	35.009	333
B1B1D6;Q9D773;B1B1D8;B1B1D7	B1B1D6;Q9D773;B1B1D8	39S ribosomal protein L2, mitochondrial	Mrpl2	>tr|B1B1D6|B1B1D6_MOUSE Mitochondrial ribosomal protein L2 OS=Mus musculus GN=Mrpl2 PE=4 SV=1;>sp|Q9D773|RM02_MOUSE 39S ribosomal protein L2, mitochondrial OS=Mus musculus GN=Mrpl2 PE=2 SV=1;>tr|B1B1D8|B1B1D8_MOUSE 39S ribosomal protein L2, mitochondrial O	4	9	9	9	4	7	5	1	2	1	5	4	4	3	3	2	4	7	5	1	2	1	5	4	4	3	3	2	4	7	5	1	2	1	5	4	4	3	3	2	44.1	44.1	44.1	33.34	306
B2C3G8;P42230;Q9JIA0;A2A5D3	B2C3G8;P42230;Q9JIA0;A2A5D3	Signal transducer and activator of transcription 5A	Stat5a	>tr|B2C3G8|B2C3G8_MOUSE STAT5a variant delta E18 OS=Mus musculus GN=Stat5a PE=2 SV=1;>sp|P42230|STA5A_MOUSE Signal transducer and activator of transcription 5A OS=Mus musculus GN=Stat5a PE=1 SV=1;>tr|Q9JIA0|Q9JIA0_MOUSE Signal transducer and activator of t	4	2	1	1	2	2	2	0	0	0	2	1	1	0	0	0	1	1	1	0	0	0	1	1	1	0	0	0	1	1	1	0	0	0	1	1	1	0	0	0	2.8	1.8	1.8	91.622	797
B2CQD6;Q08879;CON__ENSEMBL:ENSBTAP00000016046	B2CQD6;Q08879	Fibulin-1	Fbln1	>tr|B2CQD6|B2CQD6_MOUSE Fibulin 1 OS=Mus musculus GN=Fbln1 PE=2 SV=1;>sp|Q08879|FBLN1_MOUSE Fibulin-1 OS=Mus musculus GN=Fbln1 PE=1 SV=2	3	14	14	2	7	10	12	5	6	1	11	9	12	5	3	1	7	10	12	5	6	1	11	9	12	5	3	1	0	0	2	2	2	1	1	0	2	1	0	0	30.9	30.9	3.3	78.032	705
B2CZK6;Q91XQ6	B2CZK6;Q91XQ6	Lysosomal-associated transmembrane protein 4B	Laptm4b	>tr|B2CZK6|B2CZK6_MOUSE Lysosomal-associated protein transmembrane 4B OS=Mus musculus GN=Laptm4b PE=2 SV=1;>sp|Q91XQ6|LAP4B_MOUSE Lysosomal-associated transmembrane protein 4B OS=Mus musculus GN=Laptm4b PE=2 SV=1	2	3	3	3	1	1	1	2	2	2	1	0	0	2	2	3	1	1	1	2	2	2	1	0	0	2	2	3	1	1	1	2	2	2	1	0	0	2	2	3	21.1	21.1	21.1	25.395	227
B2KF04;Q91VJ4;B2KFR5;Q7TSE6-2;Q7TSE6	B2KF04;Q91VJ4	Serine/threonine-protein kinase 38	Stk38	>tr|B2KF04|B2KF04_MOUSE Serine/threonine kinase 38 OS=Mus musculus GN=Stk38 PE=4 SV=1;>sp|Q91VJ4|STK38_MOUSE Serine/threonine-protein kinase 38 OS=Mus musculus GN=Stk38 PE=1 SV=1	5	9	9	9	6	8	7	1	1	1	7	8	8	2	3	1	6	8	7	1	1	1	7	8	8	2	3	1	6	8	7	1	1	1	7	8	8	2	3	1	32.9	32.9	32.9	54.174	465
B2KF28;Q9CQC2;B2KF29	B2KF28;Q9CQC2;B2KF29	Colipase	Clps	>tr|B2KF28|B2KF28_MOUSE Colipase, pancreatic OS=Mus musculus GN=Clps PE=4 SV=1;>sp|Q9CQC2|COL_MOUSE Colipase OS=Mus musculus GN=Clps PE=2 SV=1;>tr|B2KF29|B2KF29_MOUSE Colipase OS=Mus musculus GN=Clps PE=4 SV=1	3	3	3	3	0	0	0	0	1	0	2	2	2	2	0	0	0	0	0	0	1	0	2	2	2	2	0	0	0	0	0	0	1	0	2	2	2	2	0	0	38.9	38.9	38.9	12.444	113
B2KF41;P84104;P84104-2;Q3U781;A2A4X6	B2KF41;P84104;P84104-2;Q3U781;A2A4X6	Serine/arginine-rich splicing factor 3	Srsf3;Gm12355	>tr|B2KF41|B2KF41_MOUSE MCG21131, isoform CRA_d OS=Mus musculus GN=Srsf3 PE=4 SV=1;>sp|P84104|SRSF3_MOUSE Serine/arginine-rich splicing factor 3 OS=Mus musculus GN=Srsf3 PE=1 SV=1;>sp|P84104-2|SRSF3_MOUSE Isoform Short of Serine/arginine-rich splicing fact	5	7	6	6	6	5	7	6	5	5	6	6	6	7	5	5	5	4	6	5	4	5	5	5	5	6	4	4	5	4	6	5	4	5	5	5	5	6	4	4	43.3	43.3	43.3	19.329	164
B2KFC5;Q7TNT2;Q7TNT2-2	B2KFC5;Q7TNT2;Q7TNT2-2	Fatty acyl-CoA reductase 2	Far2	>tr|B2KFC5|B2KFC5_MOUSE Fatty acyl CoA reductase 2 OS=Mus musculus GN=Far2 PE=4 SV=1;>sp|Q7TNT2|FACR2_MOUSE Fatty acyl-CoA reductase 2 OS=Mus musculus GN=Far2 PE=2 SV=1;>sp|Q7TNT2-2|FACR2_MOUSE Isoform 2 of Fatty acyl-CoA reductase 2 OS=Mus musculus GN=Far	3	19	19	19	6	10	12	11	7	9	13	15	15	14	13	16	6	10	12	11	7	9	13	15	15	14	13	16	6	10	12	11	7	9	13	15	15	14	13	16	42.5	42.5	42.5	59.166	515
B2KFC7;Q9CR89;Q9CR89-2;B2KFC9;F8WJ78;D6RGS9	B2KFC7;Q9CR89;Q9CR89-2	Endoplasmic reticulum-Golgi intermediate compartment protein 2	Ergic2	>tr|B2KFC7|B2KFC7_MOUSE ERGIC and golgi 2 OS=Mus musculus GN=Ergic2 PE=4 SV=1;>sp|Q9CR89|ERGI2_MOUSE Endoplasmic reticulum-Golgi intermediate compartment protein 2 OS=Mus musculus GN=Ergic2 PE=2 SV=1;>sp|Q9CR89-2|ERGI2_MOUSE Isoform 2 of Endoplasmic reticu	6	11	11	11	6	10	8	8	6	7	8	8	8	9	9	8	6	10	8	8	6	7	8	8	8	9	9	8	6	10	8	8	6	7	8	8	8	9	9	8	39	39	39	42.481	377
B2KG58;Q9D5J6;D6RJM2	B2KG58;Q9D5J6	Sedoheptulokinase	Shpk	>tr|B2KG58|B2KG58_MOUSE Carbohydrate kinase-like, isoform CRA_b OS=Mus musculus GN=Shpk PE=4 SV=1;>sp|Q9D5J6|SHPK_MOUSE Sedoheptulokinase OS=Mus musculus GN=Shpk PE=2 SV=1	3	10	10	10	5	5	6	7	6	5	8	7	5	5	4	6	5	5	6	7	6	5	8	7	5	5	4	6	5	5	6	7	6	5	8	7	5	5	4	6	31.9	31.9	31.9	51.302	476
B2KG89;P51576;B1AUD1	B2KG89;P51576;B1AUD1	P2X purinoceptor;P2X purinoceptor 1	P2rx1	>tr|B2KG89|B2KG89_MOUSE P2X purinoceptor OS=Mus musculus GN=P2rx1 PE=3 SV=1;>sp|P51576|P2RX1_MOUSE P2X purinoceptor 1 OS=Mus musculus GN=P2rx1 PE=2 SV=1;>tr|B1AUD1|B1AUD1_MOUSE P2X purinoceptor OS=Mus musculus GN=P2rx1 PE=3 SV=1	3	6	6	6	3	3	2	5	5	4	3	3	2	5	5	6	3	3	2	5	5	4	3	3	2	5	5	6	3	3	2	5	5	4	3	3	2	5	5	6	21.6	21.6	21.6	44.85	399
B2KG93;Q8BZR9;F7BT77	B2KG93;Q8BZR9;F7BT77	Uncharacterized protein C17orf85 homolog	1200014J11Rik	>tr|B2KG93|B2KG93_MOUSE Novel protein OS=Mus musculus GN=1200014J11Rik PE=4 SV=1;>sp|Q8BZR9|CQ085_MOUSE Uncharacterized protein C17orf85 homolog OS=Mus musculus PE=1 SV=1;>tr|F7BT77|F7BT77_MOUSE Uncharacterized protein OS=Mus musculus GN=1200014J11Rik PE=4	3	6	6	6	5	4	5	0	0	1	4	5	4	2	1	2	5	4	5	0	0	1	4	5	4	2	1	2	5	4	5	0	0	1	4	5	4	2	1	2	12.2	12.2	12.2	70.042	615
B2KGB6;Q9CQW0	B2KGB6;Q9CQW0	Transmembrane protein 93	Tmem93	>tr|B2KGB6|B2KGB6_MOUSE Transmembrane protein 93 OS=Mus musculus GN=Tmem93 PE=4 SV=1;>sp|Q9CQW0|EMC6_MOUSE ER membrane protein complex subunit 6 OS=Mus musculus GN=Emc6 PE=2 SV=1	2	3	3	3	2	3	3	2	1	0	3	2	3	3	3	3	2	3	3	2	1	0	3	2	3	3	3	3	2	3	3	2	1	0	3	2	3	3	3	3	20.9	20.9	20.9	12.017	110
B2KGB7;Q9DBG9;B1AUD9	B2KGB7;Q9DBG9	Tax1-binding protein 3	Tax1bp3	>tr|B2KGB7|B2KGB7_MOUSE Tax1 (Human T-cell leukemia virus type I) binding protein 3 OS=Mus musculus GN=Tax1bp3 PE=4 SV=1;>sp|Q9DBG9|TX1B3_MOUSE Tax1-binding protein 3 OS=Mus musculus GN=Tax1bp3 PE=1 SV=1	3	4	4	4	2	2	2	1	1	1	1	2	2	4	2	2	2	2	2	1	1	1	1	2	2	4	2	2	2	2	2	1	1	1	1	2	2	4	2	2	49.2	49.2	49.2	13.722	124
B2KGE6;P28667	B2KGE6;P28667	MARCKS-related protein	Marcksl1	>tr|B2KGE6|B2KGE6_MOUSE MARCKS-like 1 OS=Mus musculus GN=Marcksl1 PE=4 SV=1;>sp|P28667|MRP_MOUSE MARCKS-related protein OS=Mus musculus GN=Marcksl1 PE=1 SV=2	2	3	3	3	2	2	2	2	2	2	2	1	1	2	2	2	2	2	2	2	2	2	2	1	1	2	2	2	2	2	2	2	2	2	2	1	1	2	2	2	32.5	32.5	32.5	20.165	200
B2KGH1;Q91XS1;B2KGH2;Q91XS1-2;E9PVF2	B2KGH1;Q91XS1;B2KGH2;Q91XS1-2;E9PVF2	Myotubularin-related protein 4	Mtmr4	>tr|B2KGH1|B2KGH1_MOUSE Myotubularin related protein 4 OS=Mus musculus GN=Mtmr4 PE=4 SV=1;>sp|Q91XS1|MTMR4_MOUSE Myotubularin-related protein 4 OS=Mus musculus GN=Mtmr4 PE=1 SV=1;>tr|B2KGH2|B2KGH2_MOUSE Myotubularin related protein 4 OS=Mus musculus GN=Mtm	5	3	1	1	2	1	2	1	1	1	1	3	0	1	2	1	1	0	1	1	1	1	0	1	0	0	1	0	1	0	1	1	1	1	0	1	0	0	1	0	2.5	1.1	1.1	132.88	1190
B2KGQ2;Q9D0M5;D6RIN4;Q80ZS7;G5E8Z1	B2KGQ2;Q9D0M5	Dynein light chain 2, cytoplasmic	Dynll2	>tr|B2KGQ2|B2KGQ2_MOUSE Dynein light chain 2 OS=Mus musculus GN=Dynll2 PE=4 SV=1;>sp|Q9D0M5|DYL2_MOUSE Dynein light chain 2, cytoplasmic OS=Mus musculus GN=Dynll2 PE=1 SV=1	5	6	6	2	6	6	6	4	4	4	6	6	6	5	5	5	6	6	6	4	4	4	6	6	6	5	5	5	2	2	2	2	2	2	2	2	2	2	2	2	58.4	58.4	32.6	10.35	89
B2KGQ6;Q9CRY7	B2KGQ6;Q9CRY7	Glycerophosphodiester phosphodiesterase domain-containing protein 1	Gdpd1	>tr|B2KGQ6|B2KGQ6_MOUSE Glycerophosphodiester phosphodiesterase domain containing 1 OS=Mus musculus GN=Gdpd1 PE=4 SV=1;>sp|Q9CRY7|GDPD1_MOUSE Glycerophosphodiester phosphodiesterase domain-containing protein 1 OS=Mus musculus GN=Gdpd1 PE=2 SV=1	2	21	21	21	17	15	17	19	17	15	18	19	19	20	20	20	17	15	17	19	17	15	18	19	19	20	20	20	17	15	17	19	17	15	18	19	19	20	20	20	57	57	57	35.866	314
B2MWM9;P14211	B2MWM9;P14211	Calreticulin	Calr	>tr|B2MWM9|B2MWM9_MOUSE Calreticulin OS=Mus musculus GN=Calr PE=2 SV=1;>sp|P14211|CALR_MOUSE Calreticulin OS=Mus musculus GN=Calr PE=1 SV=1	2	43	42	42	38	40	41	27	25	24	40	37	39	28	26	24	37	39	40	27	25	24	39	36	38	28	26	24	37	39	40	27	25	24	39	36	38	28	26	24	79.3	79.3	79.3	47.994	416
B2RPS1;P61021	B2RPS1;P61021	Ras-related protein Rab-5B	Rab5b	>tr|B2RPS1|B2RPS1_MOUSE RAB5B, member RAS oncogene family OS=Mus musculus GN=Rab5b PE=2 SV=1;>sp|P61021|RAB5B_MOUSE Ras-related protein Rab-5B OS=Mus musculus GN=Rab5b PE=1 SV=1	2	9	5	5	8	8	8	8	8	8	9	9	9	8	8	9	4	4	4	4	4	4	5	5	5	4	4	5	4	4	4	4	4	4	5	5	5	4	4	5	52.6	33.5	33.5	23.707	215
B2RPS6;Q3U3N6;B1AXJ1;B1AXJ2	B2RPS6;Q3U3N6;B1AXJ1;B1AXJ2	Uncharacterized protein C17orf56 homolog	2410002I01Rik	>tr|B2RPS6|B2RPS6_MOUSE RIKEN cDNA 2410002I01 gene OS=Mus musculus GN=2410002I01Rik PE=2 SV=1;>sp|Q3U3N6|AP4AT_MOUSE AP-4 complex accessory subunit tepsin OS=Mus musculus PE=1 SV=1;>tr|B1AXJ1|B1AXJ1_MOUSE Novel protein OS=Mus musculus GN=2410002I01Rik PE=4	4	3	3	3	1	2	2	0	0	0	2	1	1	0	0	0	1	2	2	0	0	0	2	1	1	0	0	0	1	2	2	0	0	0	2	1	1	0	0	0	8.4	8.4	8.4	60.761	573
B2RPW2;Q8BGV8	B2RPW2;Q8BGV8	Mitochondrial dynamic protein MID51	Smcr7l	>tr|B2RPW2|B2RPW2_MOUSE Smith-Magenis syndrome chromosome region, candidate 7-like (Human) OS=Mus musculus GN=Smcr7l PE=2 SV=1;>sp|Q8BGV8|MID51_MOUSE Mitochondrial dynamic protein MID51 OS=Mus musculus GN=Smcr7l PE=1 SV=1	2	5	5	5	2	2	2	1	1	1	2	3	2	1	2	3	2	2	2	1	1	1	2	3	2	1	2	3	2	2	2	1	1	1	2	3	2	1	2	3	11.4	11.4	11.4	51.183	463
B2RQ14;Q8CDA1;F7C8P0;Q8CDA1-4	B2RQ14;Q8CDA1;F7C8P0;Q8CDA1-4	Phosphatidylinositide phosphatase SAC2	Inpp5f	>tr|B2RQ14|B2RQ14_MOUSE Inositol polyphosphate-5-phosphatase F OS=Mus musculus GN=Inpp5f PE=2 SV=1;>sp|Q8CDA1|SAC2_MOUSE Phosphatidylinositide phosphatase SAC2 OS=Mus musculus GN=Inpp5f PE=1 SV=1;>tr|F7C8P0|F7C8P0_MOUSE Phosphatidylinositide phosphatase SA	4	2	2	2	0	1	0	1	1	1	0	0	0	0	1	1	0	1	0	1	1	1	0	0	0	0	1	1	0	1	0	1	1	1	0	0	0	0	1	1	2.5	2.5	2.5	127.61	1132
B2RQ80;B9EKN8;E9PUL9;P83510;E0CY98;E0CXD6;E0CZD7;E0CZF8;E9Q617;P83510-2;E0CYV5	B2RQ80;B9EKN8;E9PUL9;P83510;E0CY98;E0CXD6;E0CZD7;E0CZF8;E9Q617;P83510-2	Traf2 and NCK-interacting protein kinase	Tnik	>tr|B2RQ80|B2RQ80_MOUSE Tnik protein OS=Mus musculus GN=Tnik PE=2 SV=1;>tr|B9EKN8|B9EKN8_MOUSE TRAF2 and NCK interacting kinase OS=Mus musculus GN=Tnik PE=2 SV=1;>tr|E9PUL9|E9PUL9_MOUSE Traf2 and NCK-interacting protein kinase OS=Mus musculus GN=Tnik PE=4	11	18	18	9	11	11	12	7	5	6	12	12	13	8	4	9	11	11	12	7	5	6	12	12	13	8	4	9	6	5	7	3	2	2	5	4	8	2	1	4	15	15	7.8	154.94	1360
B2RQC2	B2RQC2	Ubiquitin carboxyl-terminal hydrolase 42	Usp42	>sp|B2RQC2|UBP42_MOUSE Ubiquitin carboxyl-terminal hydrolase 42 OS=Mus musculus GN=Usp42 PE=2 SV=1	1	1	1	1	1	1	1	0	0	0	1	1	1	0	0	0	1	1	1	0	0	0	1	1	1	0	0	0	1	1	1	0	0	0	1	1	1	0	0	0	1.4	1.4	1.4	146.22	1324
B2RQC6;E9QAI5;G3UWN2;B7ZN27;E9QAT6;F6S3Z3	B2RQC6;E9QAI5;G3UWN2;B7ZN27		Cad	>tr|B2RQC6|B2RQC6_MOUSE Carbamoyl-phosphate synthetase 2, aspartate transcarbamylase, and dihydroorotase OS=Mus musculus GN=Cad PE=2 SV=1;>tr|E9QAI5|E9QAI5_MOUSE Protein Cad OS=Mus musculus GN=Cad PE=3 SV=1;>tr|G3UWN2|G3UWN2_MOUSE Protein Cad OS=Mus muscul	6	28	26	26	18	15	16	12	8	11	18	16	19	13	15	14	16	13	14	10	6	9	16	14	17	11	13	12	16	13	14	10	6	9	16	14	17	11	13	12	18.5	17.8	17.8	243.24	2225
B2RQE8;Q9D333	B2RQE8;Q9D333	Rho GTPase-activating protein 42	Arhgap42	>sp|B2RQE8|RHG42_MOUSE Rho GTPase-activating protein 42 OS=Mus musculus GN=Arhgap42 PE=2 SV=1;>tr|Q9D333|Q9D333_MOUSE MCG142052, isoform CRA_a OS=Mus musculus GN=Arhgap42 PE=2 SV=1	2	2	2	2	0	0	0	1	1	1	1	1	0	1	2	2	0	0	0	1	1	1	1	1	0	1	2	2	0	0	0	1	1	1	1	1	0	1	2	2	3	3	3	94.635	841
B2RQG2	B2RQG2		Phf3	>tr|B2RQG2|B2RQG2_MOUSE PHD finger protein 3 OS=Mus musculus GN=Phf3 PE=2 SV=1	1	2	2	2	1	1	1	0	0	1	1	1	2	0	0	0	1	1	1	0	0	1	1	1	2	0	0	0	1	1	1	0	0	1	1	1	2	0	0	0	0.8	0.8	0.8	225.54	2025
B2RQH0;Q7TSF1;Q61495;Q7TSF0;D3YYT2;Q7TMD7	B2RQH0;Q7TSF1;Q61495;Q7TSF0	Desmoglein-1-beta;Desmoglein-1-alpha;Desmoglein-1-gamma	Dsg1b;Dsg1a;Dsg1c	>tr|B2RQH0|B2RQH0_MOUSE Desmoglein 1 beta OS=Mus musculus GN=Dsg1b PE=2 SV=1;>sp|Q7TSF1|DSG1B_MOUSE Desmoglein-1-beta OS=Mus musculus GN=Dsg1b PE=1 SV=1;>sp|Q61495|DSG1A_MOUSE Desmoglein-1-alpha OS=Mus musculus GN=Dsg1a PE=2 SV=2;>sp|Q7TSF0|DSG1C_MOUSE Des	6	3	3	3	3	3	3	1	2	2	3	2	1	1	2	2	3	3	3	1	2	2	3	2	1	1	2	2	3	3	3	1	2	2	3	2	1	1	2	2	3.2	3.2	3.2	114.45	1060
B2RQP1;Q05921;Q3T9T6	B2RQP1;Q05921	2-5A-dependent ribonuclease	Rnasel	>tr|B2RQP1|B2RQP1_MOUSE Ribonuclease L (2, 5-oligoisoadenylate synthetase-dependent) OS=Mus musculus GN=Rnasel PE=2 SV=1;>sp|Q05921|RN5A_MOUSE 2-5A-dependent ribonuclease OS=Mus musculus GN=Rnasel PE=2 SV=2	3	22	22	22	11	11	13	9	7	6	13	16	15	9	7	6	11	11	13	9	7	6	13	16	15	9	7	6	11	11	13	9	7	6	13	16	15	9	7	6	37.4	37.4	37.4	83.274	735
B2RQQ8;P08122;D3YV27;B1AVK5	B2RQQ8;P08122	Collagen alpha-2(IV) chain;Canstatin	Col4a2	>tr|B2RQQ8|B2RQQ8_MOUSE Collagen, type IV, alpha 2 OS=Mus musculus GN=Col4a2 PE=2 SV=1;>sp|P08122|CO4A2_MOUSE Collagen alpha-2(IV) chain OS=Mus musculus GN=Col4a2 PE=2 SV=4	4	9	9	9	4	4	6	3	3	1	7	5	9	2	2	3	4	4	6	3	3	1	7	5	9	2	2	3	4	4	6	3	3	1	7	5	9	2	2	3	8.6	8.6	8.6	167.32	1707
B2RQS1;Q9ERG2;B3STQ1	B2RQS1;Q9ERG2;B3STQ1	Striatin-3	Strn3	>tr|B2RQS1|B2RQS1_MOUSE Striatin-3 OS=Mus musculus GN=Strn3 PE=2 SV=1;>sp|Q9ERG2|STRN3_MOUSE Striatin-3 OS=Mus musculus GN=Strn3 PE=1 SV=1;>tr|B3STQ1|B3STQ1_MOUSE Striatin-3 OS=Mus musculus GN=Strn3 PE=2 SV=1	3	7	5	5	2	4	5	1	1	2	5	6	5	3	3	3	1	2	3	0	0	1	3	4	3	1	1	1	1	2	3	0	0	1	3	4	3	1	1	1	13.3	11.4	11.4	77.731	712
B2RQV1;Q8BWZ3;Q8BWZ3-2;F6XQZ4;G3UZ51	B2RQV1;Q8BWZ3;Q8BWZ3-2	N-alpha-acetyltransferase 25, NatB auxiliary subunit	Naa25	>tr|B2RQV1|B2RQV1_MOUSE RIKEN cDNA C330023M02 gene OS=Mus musculus GN=Naa25 PE=2 SV=1;>sp|Q8BWZ3|NAA25_MOUSE N-alpha-acetyltransferase 25, NatB auxiliary subunit OS=Mus musculus GN=Naa25 PE=1 SV=1;>sp|Q8BWZ3-2|NAA25_MOUSE Isoform 2 of N-alpha-acetyltransfe	5	16	16	16	8	8	9	4	1	3	10	8	9	4	6	4	8	8	9	4	1	3	10	8	9	4	6	4	8	8	9	4	1	3	10	8	9	4	6	4	22.8	22.8	22.8	111.71	972
B2RQZ3;Q8BYR8;Q8BJA2;D3Z5A5	B2RQZ3;Q8BYR8	Solute carrier family 41 member 2	Slc41a2	>tr|B2RQZ3|B2RQZ3_MOUSE Solute carrier family 41, member 2 OS=Mus musculus GN=Slc41a2 PE=2 SV=1;>sp|Q8BYR8|S41A2_MOUSE Solute carrier family 41 member 2 OS=Mus musculus GN=Slc41a2 PE=2 SV=1	4	4	4	3	2	1	2	1	1	1	2	1	1	2	2	2	2	1	2	1	1	1	2	1	1	2	2	2	1	0	1	1	1	1	1	1	1	1	2	2	9.1	9.1	7.3	62.304	573
B2RQZ6;Q8BWS5	B2RQZ6;Q8BWS5	G protein-regulated inducer of neurite outgrowth 3	Gprin3	>tr|B2RQZ6|B2RQZ6_MOUSE GPRIN family member 3 OS=Mus musculus GN=Gprin3 PE=2 SV=1;>sp|Q8BWS5|GRIN3_MOUSE G protein-regulated inducer of neurite outgrowth 3 OS=Mus musculus GN=Gprin3 PE=1 SV=1	2	8	8	8	2	2	4	5	5	4	0	1	4	0	0	1	2	2	4	5	5	4	0	1	4	0	0	1	2	2	4	5	5	4	0	1	4	0	0	1	14.9	14.9	14.9	80.484	763
B2RR67;Q9WVQ0	B2RR67;Q9WVQ0	Polyamine-modulated factor 1-binding protein 1	Pmfbp1	>tr|B2RR67|B2RR67_MOUSE Polyamine modulated factor 1 binding protein 1 OS=Mus musculus GN=Pmfbp1 PE=2 SV=1;>sp|Q9WVQ0|PMFBP_MOUSE Polyamine-modulated factor 1-binding protein 1 OS=Mus musculus GN=Pmfbp1 PE=2 SV=1	2	2	2	2	1	0	0	0	0	0	0	0	1	0	0	0	1	0	0	0	0	0	0	0	1	0	0	0	1	0	0	0	0	0	0	0	1	0	0	0	2.1	2.1	2.1	119.4	1022
B2RR82;Q9Z0R6;E9QNG1;Q9Z0R6-2;Q3V3Y8;F6U8U1	B2RR82;Q9Z0R6;E9QNG1;Q9Z0R6-2;Q3V3Y8	Intersectin-2	Itsn2	>tr|B2RR82|B2RR82_MOUSE Intersectin-2 OS=Mus musculus GN=Itsn2 PE=2 SV=1;>sp|Q9Z0R6|ITSN2_MOUSE Intersectin-2 OS=Mus musculus GN=Itsn2 PE=1 SV=2;>tr|E9QNG1|E9QNG1_MOUSE Intersectin-2 OS=Mus musculus GN=Itsn2 PE=4 SV=1;>sp|Q9Z0R6-2|ITSN2_MOUSE Isoform 2 of	6	11	11	10	5	5	7	2	1	1	5	5	5	1	2	1	5	5	7	2	1	1	5	5	5	1	2	1	4	4	6	1	1	1	5	5	5	1	2	1	8.8	8.8	8.2	191.73	1685
B2RR83	B2RR83	Probable ATP-dependent RNA helicase YTHDC2	Ythdc2	>sp|B2RR83|YTDC2_MOUSE Probable ATP-dependent RNA helicase YTHDC2 OS=Mus musculus GN=Ythdc2 PE=2 SV=1	1	16	16	16	9	9	9	5	4	5	8	12	11	4	4	3	9	9	9	5	4	5	8	12	11	4	4	3	9	9	9	5	4	5	8	12	11	4	4	3	13.8	13.8	13.8	161.09	1445
B2RR84;Q9Z0X4;Q61409;E9QLQ3;Q8BRU7	B2RR84;Q9Z0X4	cGMP-inhibited 3,5-cyclic phosphodiesterase A	Pde3a	>tr|B2RR84|B2RR84_MOUSE Phosphodiesterase 3A, cGMP inhibited OS=Mus musculus GN=Pde3a PE=2 SV=1;>sp|Q9Z0X4|PDE3A_MOUSE cGMP-inhibited 3,5-cyclic phosphodiesterase A OS=Mus musculus GN=Pde3a PE=1 SV=1	5	8	8	8	5	3	4	2	2	3	3	5	4	3	3	4	5	3	4	2	2	3	3	5	4	3	3	4	5	3	4	2	2	3	3	5	4	3	3	4	10.1	10.1	10.1	124.51	1141
B2RRE0;Q9WTQ5;Q9WTQ5-2;F8WI21	B2RRE0;Q9WTQ5;Q9WTQ5-2;F8WI21	A-kinase anchor protein 12	Akap12	>tr|B2RRE0|B2RRE0_MOUSE A kinase (PRKA) anchor protein (Gravin) 12 OS=Mus musculus GN=Akap12 PE=2 SV=1;>sp|Q9WTQ5|AKA12_MOUSE A-kinase anchor protein 12 OS=Mus musculus GN=Akap12 PE=1 SV=1;>sp|Q9WTQ5-2|AKA12_MOUSE Isoform 2 of A-kinase anchor protein 12 OS	4	17	17	17	11	14	14	1	0	1	13	11	12	1	0	0	11	14	14	1	0	1	13	11	12	1	0	0	11	14	14	1	0	1	13	11	12	1	0	0	16.9	16.9	16.9	180.69	1684
B2RRE7;E9QMS3;G3UXQ0	B2RRE7;E9QMS3	OTU domain-containing protein 4	Otud4	>sp|B2RRE7|OTUD4_MOUSE OTU domain-containing protein 4 OS=Mus musculus GN=Otud4 PE=1 SV=1;>tr|E9QMS3|E9QMS3_MOUSE OTU domain-containing protein 4 OS=Mus musculus GN=Otud4 PE=4 SV=1	3	7	7	7	3	6	6	1	1	0	4	4	6	0	1	2	3	6	6	1	1	0	4	4	6	0	1	2	3	6	6	1	1	0	4	4	6	0	1	2	11.7	11.7	11.7	123.05	1107
B2RRF3;Q8C341-2;Q8C341	B2RRF3;Q8C341-2;Q8C341	Protein osteopotentia	AI848100;Opt	>tr|B2RRF3|B2RRF3_MOUSE AI848100 protein OS=Mus musculus GN=AI848100 PE=2 SV=1;>sp|Q8C341-2|OSPT_MOUSE Isoform 2 of Protein osteopotentia OS=Mus musculus GN=Opt;>sp|Q8C341|OSPT_MOUSE Protein osteopotentia OS=Mus musculus GN=Opt PE=1 SV=3	3	1	1	1	1	1	1	0	0	0	1	1	1	0	0	0	1	1	1	0	0	0	1	1	1	0	0	0	1	1	1	0	0	0	1	1	1	0	0	0	0.9	0.9	0.9	139.53	1254
B2RRH9;Q3THK7	B2RRH9;Q3THK7	GMP synthase [glutamine-hydrolyzing]	Gmps	>tr|B2RRH9|B2RRH9_MOUSE Guanine monphosphate synthetase OS=Mus musculus GN=Gmps PE=2 SV=1;>sp|Q3THK7|GUAA_MOUSE GMP synthase [glutamine-hydrolyzing] OS=Mus musculus GN=Gmps PE=1 SV=2	2	19	19	19	17	17	16	10	6	9	15	17	14	12	11	13	17	17	16	10	6	9	15	17	14	12	11	13	17	17	16	10	6	9	15	17	14	12	11	13	41.1	41.1	41.1	76.723	693
B2RRI2;Q689Z5-2;Q689Z5;E9PW13;E9Q429	B2RRI2;Q689Z5-2;Q689Z5;E9PW13	Protein strawberry notch homolog 1	Sbno1	>tr|B2RRI2|B2RRI2_MOUSE Protein strawberry notch homolog 1 OS=Mus musculus GN=Sbno1 PE=2 SV=1;>sp|Q689Z5-2|SBNO1_MOUSE Isoform 2 of Protein strawberry notch homolog 1 OS=Mus musculus GN=Sbno1;>sp|Q689Z5|SBNO1_MOUSE Protein strawberry notch homolog 1 OS=Mus	5	10	10	7	5	4	4	3	2	3	7	5	4	2	4	2	5	4	4	3	2	3	7	5	4	2	4	2	2	2	3	1	0	1	5	3	3	0	2	1	9.3	9.3	7.1	153.92	1391
B2RRM5;Q3V009;Q05DM6;Q3V009-2	B2RRM5;Q3V009;Q05DM6;Q3V009-2	Transmembrane emp24 domain-containing protein 1	Tmed1	>tr|B2RRM5|B2RRM5_MOUSE Transmembrane emp24 domain containing 1 OS=Mus musculus GN=Tmed1 PE=2 SV=1;>sp|Q3V009|TMED1_MOUSE Transmembrane emp24 domain-containing protein 1 OS=Mus musculus GN=Tmed1 PE=2 SV=1;>tr|Q05DM6|Q05DM6_MOUSE Tmed1 protein OS=Mus muscul	4	4	4	4	3	3	3	3	4	3	3	3	3	3	3	3	3	3	3	3	4	3	3	3	3	3	3	3	3	3	3	3	4	3	3	3	3	3	3	3	18.1	18.1	18.1	25.262	227
B2RRV3;P50284	B2RRV3;P50284	Tumor necrosis factor receptor superfamily member 3	Ltbr	>tr|B2RRV3|B2RRV3_MOUSE Lymphotoxin B receptor OS=Mus musculus GN=Ltbr PE=2 SV=1;>sp|P50284|TNR3_MOUSE Tumor necrosis factor receptor superfamily member 3 OS=Mus musculus GN=Ltbr PE=1 SV=1	2	2	2	2	1	1	1	1	1	1	2	1	1	2	2	2	1	1	1	1	1	1	2	1	1	2	2	2	1	1	1	1	1	1	2	1	1	2	2	2	8.7	8.7	8.7	44.956	415
B2RRX1;CON__P60712;P60710;E9Q1F2	B2RRX1;CON__P60712;P60710;E9Q1F2	Actin, cytoplasmic 1;Actin, cytoplasmic 1, N-terminally processed	Actb	>tr|B2RRX1|B2RRX1_MOUSE Actin, beta OS=Mus musculus GN=Actb PE=2 SV=1;>P60712 SWISS-PROT:P60712 (Bos taurus) Actin, cytoplasmic 1;>sp|P60710|ACTB_MOUSE Actin, cytoplasmic 1 OS=Mus musculus GN=Actb PE=1 SV=1;>tr|E9Q1F2|E9Q1F2_MOUSE Actin, cytoplasmic 1, N-t	4	34	2	0	29	31	32	31	30	33	31	30	30	32	32	32	2	2	1	2	2	2	2	2	2	2	2	2	0	0	0	0	0	0	0	0	0	0	0	0	83.2	4.8	0	41.736	375
B2RRY4;Q9JLB2	B2RRY4;Q9JLB2	MAGUK p55 subfamily member 5	Mpp5	>tr|B2RRY4|B2RRY4_MOUSE Membrane protein, palmitoylated 5 (MAGUK p55 subfamily member 5) OS=Mus musculus GN=Mpp5 PE=2 SV=1;>sp|Q9JLB2|MPP5_MOUSE MAGUK p55 subfamily member 5 OS=Mus musculus GN=Mpp5 PE=1 SV=1	2	20	20	20	8	12	13	14	9	14	13	11	13	14	10	14	8	12	13	14	9	14	13	11	13	14	10	14	8	12	13	14	9	14	13	11	13	14	10	14	50.4	50.4	50.4	77.229	675
B2RRZ7;Q3U0V2;D6RGL2;D6RCI0;E9Q534	B2RRZ7;Q3U0V2	Tumor necrosis factor receptor type 1-associated DEATH domain protein	Tradd	>tr|B2RRZ7|B2RRZ7_MOUSE TNFRSF1A-associated via death domain OS=Mus musculus GN=Tradd PE=2 SV=1;>sp|Q3U0V2|TRADD_MOUSE Tumor necrosis factor receptor type 1-associated DEATH domain protein OS=Mus musculus GN=Tradd PE=1 SV=1	5	14	14	14	8	10	12	12	10	11	11	10	12	13	13	12	8	10	12	12	10	11	11	10	12	13	13	12	8	10	12	12	10	11	11	10	12	13	13	12	59.4	59.4	59.4	34.577	310
B2RS09;Q7JJ13;Q7JJ13-2;F8WIU6;G3UZR9	B2RS09;Q7JJ13;Q7JJ13-2;F8WIU6	Bromodomain-containing protein 2	Brd2	>tr|B2RS09|B2RS09_MOUSE Bromodomain containing 2 OS=Mus musculus GN=Brd2 PE=2 SV=1;>sp|Q7JJ13|BRD2_MOUSE Bromodomain-containing protein 2 OS=Mus musculus GN=Brd2 PE=1 SV=1;>sp|Q7JJ13-2|BRD2_MOUSE Isoform 2 of Bromodomain-containing protein 2 OS=Mus musculu	5	5	5	5	4	5	4	3	3	1	3	4	4	3	2	3	4	5	4	3	3	1	3	4	4	3	2	3	4	5	4	3	3	1	3	4	4	3	2	3	6.6	6.6	6.6	88.066	798
B2RS24;Q61146;E0CZ73;E0CZ91	B2RS24;Q61146;E0CZ73	Occludin	Ocln	>tr|B2RS24|B2RS24_MOUSE Occludin OS=Mus musculus GN=Ocln PE=2 SV=1;>sp|Q61146|OCLN_MOUSE Occludin OS=Mus musculus GN=Ocln PE=1 SV=1;>tr|E0CZ73|E0CZ73_MOUSE Occludin OS=Mus musculus GN=Ocln PE=4 SV=1	4	14	14	14	10	11	11	13	12	14	8	11	11	11	11	12	10	11	11	13	12	14	8	11	11	11	11	12	10	11	11	13	12	14	8	11	11	11	11	12	38.2	38.2	38.2	58.999	521
B2RS30;Q9Z1Y4;E9Q760	B2RS30;Q9Z1Y4;E9Q760	Thyroid receptor-interacting protein 6	Trip6	>tr|B2RS30|B2RS30_MOUSE Thyroid hormone receptor interactor 6 OS=Mus musculus GN=Trip6 PE=2 SV=1;>sp|Q9Z1Y4|TRIP6_MOUSE Thyroid receptor-interacting protein 6 OS=Mus musculus GN=Trip6 PE=1 SV=1;>tr|E9Q760|E9Q760_MOUSE Thyroid receptor-interacting protein 6	3	1	1	1	1	1	1	0	0	0	1	1	1	0	0	0	1	1	1	0	0	0	1	1	1	0	0	0	1	1	1	0	0	0	1	1	1	0	0	0	4.2	4.2	4.2	50.933	480
B2RS41;Q8BWF0	B2RS41;Q8BWF0	Succinate-semialdehyde dehydrogenase, mitochondrial	Aldh5a1	>tr|B2RS41|B2RS41_MOUSE Aldhehyde dehydrogenase family 5, subfamily A1 OS=Mus musculus GN=Aldh5a1 PE=2 SV=1;>sp|Q8BWF0|SSDH_MOUSE Succinate-semialdehyde dehydrogenase, mitochondrial OS=Mus musculus GN=Aldh5a1 PE=1 SV=1	2	18	18	18	15	15	15	12	10	11	16	15	15	10	11	13	15	15	15	12	10	11	16	15	15	10	11	13	15	15	15	12	10	11	16	15	15	10	11	13	44	44	44	55.968	523
B2RS43;Q9Z1R4	B2RS43;Q9Z1R4	Uncharacterized protein C6orf47 homolog	D17H6S53E;D17h6s53e	>tr|B2RS43|B2RS43_MOUSE DNA segment, Chr 17, human D6S53E OS=Mus musculus GN=D17H6S53E PE=2 SV=1;>sp|Q9Z1R4|CF047_MOUSE Uncharacterized protein C6orf47 homolog OS=Mus musculus GN=D17h6s53e PE=2 SV=1	2	8	8	8	7	8	7	6	6	6	7	7	7	6	5	6	7	8	7	6	6	6	7	7	7	6	5	6	7	8	7	6	6	6	7	7	7	6	5	6	35.8	35.8	35.8	32.014	293
B2RS76;CON__Q2KIG3	B2RS76		Cpb1	>tr|B2RS76|B2RS76_MOUSE Carboxypeptidase B1 (Tissue) OS=Mus musculus GN=Cpb1 PE=2 SV=1	2	15	15	15	3	11	5	2	6	1	14	9	5	12	9	3	3	11	5	2	6	1	14	9	5	12	9	3	3	11	5	2	6	1	14	9	5	12	9	3	45.3	45.3	45.3	47.573	415
B2RS80;Q9QYC7	B2RS80;Q9QYC7	Vitamin K-dependent gamma-carboxylase	Ggcx	>tr|B2RS80|B2RS80_MOUSE Gamma-glutamyl carboxylase OS=Mus musculus GN=Ggcx PE=2 SV=1;>sp|Q9QYC7|VKGC_MOUSE Vitamin K-dependent gamma-carboxylase OS=Mus musculus GN=Ggcx PE=2 SV=1	2	4	4	4	1	2	3	0	2	0	3	3	2	1	1	2	1	2	3	0	2	0	3	3	2	1	1	2	1	2	3	0	2	0	3	3	2	1	1	2	5.8	5.8	5.8	87.194	757
B2RS85;Q9QXV8	B2RS85;Q9QXV8	Protein sprouty homolog 2	Spry2	>tr|B2RS85|B2RS85_MOUSE Sprouty homolog 2 (Drosophila) OS=Mus musculus GN=Spry2 PE=2 SV=1;>sp|Q9QXV8|SPY2_MOUSE Protein sprouty homolog 2 OS=Mus musculus GN=Spry2 PE=2 SV=1	2	1	1	1	0	1	0	1	0	1	0	0	0	1	1	1	0	1	0	1	0	1	0	0	0	1	1	1	0	1	0	1	0	1	0	0	0	1	1	1	5.7	5.7	5.7	34.623	315
B2RSC8;P46935	B2RSC8;P46935	E3 ubiquitin-protein ligase NEDD4	Nedd4	>tr|B2RSC8|B2RSC8_MOUSE E3 ubiquitin-protein ligase OS=Mus musculus GN=Nedd4 PE=2 SV=1;>sp|P46935|NEDD4_MOUSE E3 ubiquitin-protein ligase NEDD4 OS=Mus musculus GN=Nedd4 PE=1 SV=3	2	14	11	11	5	5	11	2	1	2	10	8	10	2	2	2	3	3	9	1	0	1	7	6	8	0	0	0	3	3	9	1	0	1	7	6	8	0	0	0	20.9	18.4	18.4	102.71	887
B2RSH2	B2RSH2	Guanine nucleotide-binding protein G(i) subunit alpha-1	Gnai1	>sp|B2RSH2|GNAI1_MOUSE Guanine nucleotide-binding protein G(i) subunit alpha-1 OS=Mus musculus GN=Gnai1 PE=2 SV=1	1	13	2	2	12	11	12	11	9	11	12	10	12	10	11	12	1	1	1	1	1	1	1	1	1	1	1	2	1	1	1	1	1	1	1	1	1	1	1	2	34.5	6.5	6.5	40.361	354
B2RSH3;Q08091;Q08091-2	B2RSH3;Q08091;Q08091-2	Calponin-1	Cnn1	>tr|B2RSH3|B2RSH3_MOUSE Calponin 1 OS=Mus musculus GN=Cnn1 PE=2 SV=1;>sp|Q08091|CNN1_MOUSE Calponin-1 OS=Mus musculus GN=Cnn1 PE=2 SV=1;>sp|Q08091-2|CNN1_MOUSE Isoform Beta of Calponin-1 OS=Mus musculus GN=Cnn1	3	3	3	3	3	3	3	2	0	1	2	3	2	1	1	2	3	3	3	2	0	1	2	3	2	1	1	2	3	3	3	2	0	1	2	3	2	1	1	2	16.2	16.2	16.2	33.355	297
B2RSI6;Q5DU41	B2RSI6;Q5DU41	Leucine-rich repeat-containing protein 8B	Lrrc8b	>tr|B2RSI6|B2RSI6_MOUSE Leucine rich repeat containing 8 family, member B OS=Mus musculus GN=Lrrc8b PE=2 SV=1;>sp|Q5DU41|LRC8B_MOUSE Leucine-rich repeat-containing protein 8B OS=Mus musculus GN=Lrrc8b PE=2 SV=2	2	10	10	10	3	4	3	5	4	5	2	1	2	2	4	4	3	4	3	5	4	5	2	1	2	2	4	4	3	4	3	5	4	5	2	1	2	2	4	4	13.8	13.8	13.8	92.185	803
B2RSN3;Q9CWF2;G3UZR1	B2RSN3;Q9CWF2	Tubulin beta-2B chain	Tubb2b	>tr|B2RSN3|B2RSN3_MOUSE MCG1395 OS=Mus musculus GN=Tubb2b PE=2 SV=1;>sp|Q9CWF2|TBB2B_MOUSE Tubulin beta-2B chain OS=Mus musculus GN=Tubb2b PE=1 SV=1	3	29	4	0	20	21	24	20	18	20	22	23	27	22	23	25	3	3	4	1	1	2	4	4	4	3	3	3	0	0	0	0	0	0	0	0	0	0	0	0	76	17.1	0	49.953	445
B2RSR0;Q9DBW0;H9H9R5	B2RSR0;Q9DBW0	Cytochrome P450 4V2	Cyp4v3;Cyp4v2	>tr|B2RSR0|B2RSR0_MOUSE Cytochrome P450, family 4, subfamily v, polypeptide 3 OS=Mus musculus GN=Cyp4v3 PE=2 SV=1;>sp|Q9DBW0|CP4V2_MOUSE Cytochrome P450 4V2 OS=Mus musculus GN=Cyp4v2 PE=1 SV=1	3	26	26	25	20	20	21	20	15	20	22	23	24	21	20	23	20	20	21	20	15	20	22	23	24	21	20	23	19	19	21	19	15	20	21	22	23	20	19	22	45.3	45.3	44	60.938	525
B2RSR2;Q8BH47;B7ZNW3	B2RSR2;Q8BH47;B7ZNW3	Vesicle-trafficking protein SEC22a	Sec22a	>tr|B2RSR2|B2RSR2_MOUSE SEC22 vesicle trafficking protein homologe A (S. cerevisiae) OS=Mus musculus GN=Sec22a PE=2 SV=1;>sp|Q8BH47|SC22A_MOUSE Vesicle-trafficking protein SEC22a OS=Mus musculus GN=Sec22a PE=2 SV=1;>tr|B7ZNW3|B7ZNW3_MOUSE Sec22a protein OS	3	6	6	6	3	3	3	4	4	3	4	3	3	6	6	4	3	3	3	4	4	3	4	3	3	6	6	4	3	3	3	4	4	3	4	3	3	6	6	4	28.3	28.3	28.3	35.024	307
B2RSR7;Q3ULJ0;Q3ULJ0-2;D3Z0L6;Q6NXY9	B2RSR7;Q3ULJ0;Q3ULJ0-2	Glycerol-3-phosphate dehydrogenase 1-like protein	Gpd1l	>tr|B2RSR7|B2RSR7_MOUSE Glycerol-3-phosphate dehydrogenase 1-like OS=Mus musculus GN=Gpd1l PE=2 SV=1;>sp|Q3ULJ0|GPD1L_MOUSE Glycerol-3-phosphate dehydrogenase 1-like protein OS=Mus musculus GN=Gpd1l PE=1 SV=2;>sp|Q3ULJ0-2|GPD1L_MOUSE Isoform 2 of Glycerol-	5	18	15	15	11	12	12	8	9	10	12	11	16	13	12	12	9	10	10	7	8	9	10	10	13	12	12	11	9	10	10	7	8	9	10	10	13	12	12	11	64.7	60.1	60.1	38.225	351
B2RSU7;Q8CHG3;E9PWI6;E0CYI9;E0CX24;E0CY89	B2RSU7;Q8CHG3;E9PWI6;E0CYI9	GRIP and coiled-coil domain-containing protein 2	Gcc2	>tr|B2RSU7|B2RSU7_MOUSE GRIP and coiled-coil domain containing 2 OS=Mus musculus GN=Gcc2 PE=2 SV=1;>sp|Q8CHG3|GCC2_MOUSE GRIP and coiled-coil domain-containing protein 2 OS=Mus musculus GN=Gcc2 PE=1 SV=2;>tr|E9PWI6|E9PWI6_MOUSE GRIP and coiled-coil domain-	6	32	32	32	14	20	19	3	6	4	17	15	14	2	7	7	14	20	19	3	6	4	17	15	14	2	7	7	14	20	19	3	6	4	17	15	14	2	7	7	25.1	25.1	25.1	194.56	1680
B2RSV4;Q921M3;F8WHW1;Q921M3-2	B2RSV4;Q921M3;F8WHW1;Q921M3-2	Splicing factor 3B subunit 3	Sf3b3	>tr|B2RSV4|B2RSV4_MOUSE Splicing factor 3b, subunit 3 OS=Mus musculus GN=Sf3b3 PE=2 SV=1;>sp|Q921M3|SF3B3_MOUSE Splicing factor 3B subunit 3 OS=Mus musculus GN=Sf3b3 PE=2 SV=1;>tr|F8WHW1|F8WHW1_MOUSE Splicing factor 3B subunit 3 OS=Mus musculus GN=Sf3b3 PE	4	45	45	45	37	38	41	21	19	21	36	37	37	29	31	29	37	38	41	21	19	21	36	37	37	29	31	29	37	38	41	21	19	21	36	37	37	29	31	29	44.7	44.7	44.7	135.55	1217
B2RT54;E9Q635;H3BKF5	B2RT54;E9Q635		Apol7a	>tr|B2RT54|B2RT54_MOUSE Apolipoprotein L 7a OS=Mus musculus GN=Apol7a PE=2 SV=1;>tr|E9Q635|E9Q635_MOUSE Protein Apol7a OS=Mus musculus GN=Apol7a PE=4 SV=1	3	3	3	3	1	0	1	0	0	0	0	0	2	1	0	0	1	0	1	0	0	0	0	0	2	1	0	0	1	0	1	0	0	0	0	0	2	1	0	0	7.2	7.2	7.2	45.91	418
B2RT77;Q78WZ7	B2RT77;Q78WZ7	DNA-directed RNA polymerase I subunit RPA43	Twistnb	>tr|B2RT77|B2RT77_MOUSE TWIST neighbor OS=Mus musculus GN=Twistnb PE=2 SV=1;>sp|Q78WZ7|RPA43_MOUSE DNA-directed RNA polymerase I subunit RPA43 OS=Mus musculus GN=Twistnb PE=1 SV=1	2	3	3	3	3	3	3	1	1	1	3	2	2	1	1	1	3	3	3	1	1	1	3	2	2	1	1	1	3	3	3	1	1	1	3	2	2	1	1	1	12.1	12.1	12.1	36.721	330
B2RT97;Q9WVJ2;E9Q5I9;E9Q0U1;F6ZQQ3;F6PXS6;E9PY93	B2RT97;Q9WVJ2;E9Q5I9;E9Q0U1	26S proteasome non-ATPase regulatory subunit 13	Psmd13	>tr|B2RT97|B2RT97_MOUSE Proteasome (Prosome, macropain) 26S subunit, non-ATPase, 13 OS=Mus musculus GN=Psmd13 PE=2 SV=1;>sp|Q9WVJ2|PSD13_MOUSE 26S proteasome non-ATPase regulatory subunit 13 OS=Mus musculus GN=Psmd13 PE=1 SV=1;>tr|E9Q5I9|E9Q5I9_MOUSE 26S p	7	22	22	22	16	17	17	11	10	13	18	20	21	16	19	17	16	17	17	11	10	13	18	20	21	16	19	17	16	17	17	11	10	13	18	20	21	16	19	17	65.2	65.2	65.2	42.809	376
B2RTB0;Q3UHX2	B2RTB0;Q3UHX2	28 kDa heat- and acid-stable phosphoprotein	Pdap1	>tr|B2RTB0|B2RTB0_MOUSE MCG17262 OS=Mus musculus GN=Pdap1 PE=2 SV=1;>sp|Q3UHX2|HAP28_MOUSE 28 kDa heat- and acid-stable phosphoprotein OS=Mus musculus GN=Pdap1 PE=1 SV=1	2	11	11	11	11	10	11	4	3	4	8	10	11	7	8	5	11	10	11	4	3	4	8	10	11	7	8	5	11	10	11	4	3	4	8	10	11	7	8	5	56.4	56.4	56.4	20.605	181
B2RTE3;Q4FK66;Q4FK66-2	B2RTE3;Q4FK66	Pre-mRNA-splicing factor 38A	Prpf38a	>tr|B2RTE3|B2RTE3_MOUSE MCG17981 OS=Mus musculus GN=Prpf38a PE=2 SV=1;>sp|Q4FK66|PR38A_MOUSE Pre-mRNA-splicing factor 38A OS=Mus musculus GN=Prpf38a PE=1 SV=1	3	10	10	10	5	8	8	1	1	0	8	10	7	4	2	1	5	8	8	1	1	0	8	10	7	4	2	1	5	8	8	1	1	0	8	10	7	4	2	1	30.4	30.4	30.4	37.436	312
B2RTE4;Q32Q92	B2RTE4;Q32Q92	Acyl-coenzyme A thioesterase 6	Acot6	>tr|B2RTE4|B2RTE4_MOUSE Acyl-CoA thioesterase 6 OS=Mus musculus GN=Acot6 PE=2 SV=1;>sp|Q32Q92|ACOT6_MOUSE Acyl-coenzyme A thioesterase 6 OS=Mus musculus GN=Acot6 PE=1 SV=1	2	5	1	1	5	4	5	2	3	2	4	4	3	3	4	3	1	1	1	0	1	1	0	0	0	0	0	0	1	1	1	0	1	1	0	0	0	0	0	0	11.9	1.9	1.9	46.768	419
B2RTG9;Q9D011	B2RTG9;Q9D011	TTD non-photosensitive 1 protein homolog	2810021B07Rik;Ttdn1	>tr|B2RTG9|B2RTG9_MOUSE RIKEN cDNA 2810021B07 OS=Mus musculus GN=2810021B07Rik PE=2 SV=1;>sp|Q9D011|MPLKI_MOUSE M-phase-specific PLK1-interacting protein OS=Mus musculus GN=Mplkip PE=2 SV=1	2	1	1	1	1	0	0	0	0	0	0	1	1	0	0	0	1	0	0	0	0	0	0	1	1	0	0	0	1	0	0	0	0	0	0	1	1	0	0	0	14	14	14	19.06	178
B2RTJ2;Q3URF8;E9Q6T9;Q5M956-2;F8WHP9;Q5M956;F6YC51	B2RTJ2;Q3URF8;E9Q6T9;Q5M956-2;F8WHP9;Q5M956;F6YC51	BTB/POZ domain-containing protein KCTD21;BTB/POZ domain-containing protein KCTD1	Kctd21;Kctd1	>tr|B2RTJ2|B2RTJ2_MOUSE BTB/POZ domain-containing protein KCTD21 OS=Mus musculus GN=Kctd21 PE=2 SV=1;>sp|Q3URF8|KCD21_MOUSE BTB/POZ domain-containing protein KCTD21 OS=Mus musculus GN=Kctd21 PE=2 SV=1;>tr|E9Q6T9|E9Q6T9_MOUSE BTB/POZ domain-containing prote	7	2	2	2	0	1	0	1	0	1	1	0	1	0	1	1	0	1	0	1	0	1	1	0	1	0	1	1	0	1	0	1	0	1	1	0	1	0	1	1	9.2	9.2	9.2	29.657	260
B2RTK3;P10854;Q64478;Q64525;Q6ZWY9;G3X9D5	B2RTK3;P10854;Q64478;Q64525;Q6ZWY9	Histone H2B;Histone H2B type 1-M;Histone H2B type 1-H;Histone H2B type 2-B;Histone H2B type 1-C/E/G	Hist1h2bm;Hist1h2bh;Hist2h2bb;Hist1h2bc	>tr|B2RTK3|B2RTK3_MOUSE Histone H2B OS=Mus musculus GN=Hist1h2bm PE=2 SV=1;>sp|P10854|H2B1M_MOUSE Histone H2B type 1-M OS=Mus musculus GN=Hist1h2bm PE=1 SV=2;>sp|Q64478|H2B1H_MOUSE Histone H2B type 1-H OS=Mus musculus GN=Hist1h2bh PE=1 SV=3;>sp|Q64525|H2B2	6	13	13	2	11	10	9	9	8	8	8	9	9	9	9	9	11	10	9	9	8	8	8	9	9	9	9	9	2	1	2	1	0	0	1	2	1	1	2	1	69	69	22.2	13.936	126
B2RTL5;O35945	B2RTL5;O35945	Aldehyde dehydrogenase, cytosolic 1	Aldh1a7	>tr|B2RTL5|B2RTL5_MOUSE Aldehyde dehydrogenase family 1, subfamily A7 OS=Mus musculus GN=Aldh1a7 PE=2 SV=1;>sp|O35945|AL1A7_MOUSE Aldehyde dehydrogenase, cytosolic 1 OS=Mus musculus GN=Aldh1a7 PE=2 SV=1	2	29	15	15	24	25	27	17	14	16	27	26	23	26	24	24	11	13	14	7	3	7	13	12	10	12	10	10	11	13	14	7	3	7	13	12	10	12	10	10	61.3	36.5	36.5	54.587	501
B2RTM0;P62806	B2RTM0;P62806	Histone H4	Gm11275;Hist1h4a	>tr|B2RTM0|B2RTM0_MOUSE Histone H4 OS=Mus musculus GN=Gm11275 PE=3 SV=1;>sp|P62806|H4_MOUSE Histone H4 OS=Mus musculus GN=Hist1h4a PE=1 SV=2	2	16	16	16	15	14	15	10	11	12	15	15	15	13	14	14	15	14	15	10	11	12	15	15	15	13	14	14	15	14	15	10	11	12	15	15	15	13	14	14	70.9	70.9	70.9	11.367	103
B2RTN5;Q91YM2;F7CQQ6	B2RTN5;Q91YM2;F7CQQ6	Rho GTPase-activating protein 35	Grlf1;Arhgap35	>tr|B2RTN5|B2RTN5_MOUSE Glucocorticoid receptor DNA binding factor 1 OS=Mus musculus GN=Grlf1 PE=2 SV=1;>sp|Q91YM2|RHG35_MOUSE Rho GTPase-activating protein 35 OS=Mus musculus GN=Arhgap35 PE=1 SV=3;>tr|F7CQQ6|F7CQQ6_MOUSE Protein Grlf1 OS=Mus musculus GN=G	3	2	2	2	2	1	2	0	0	0	1	1	2	0	0	0	2	1	2	0	0	0	1	1	2	0	0	0	2	1	2	0	0	0	1	1	2	0	0	0	2.1	2.1	2.1	170.39	1499
B2RU69;P70412	B2RU69;P70412	CUB and zona pellucida-like domain-containing protein 1	Cuzd1	>tr|B2RU69|B2RU69_MOUSE CUB and zona pellucida-like domain-containing protein 1 OS=Mus musculus GN=Cuzd1 PE=2 SV=1;>sp|P70412|CUZD1_MOUSE CUB and zona pellucida-like domain-containing protein 1 OS=Mus musculus GN=Cuzd1 PE=2 SV=2	2	3	3	3	1	0	1	1	0	0	3	1	1	2	1	0	1	0	1	1	0	0	3	1	1	2	1	0	1	0	1	1	0	0	3	1	1	2	1	0	8.7	8.7	8.7	68.194	607
B2RUC7;Q9Z1Z2	B2RUC7;Q9Z1Z2	Serine-threonine kinase receptor-associated protein	Strap	>tr|B2RUC7|B2RUC7_MOUSE Serine/threonine kinase receptor associated protein OS=Mus musculus GN=Strap PE=2 SV=1;>sp|Q9Z1Z2|STRAP_MOUSE Serine-threonine kinase receptor-associated protein OS=Mus musculus GN=Strap PE=1 SV=2	2	15	15	15	11	12	13	8	7	7	11	12	10	6	6	8	11	12	13	8	7	7	11	12	10	6	6	8	11	12	13	8	7	7	11	12	10	6	6	8	52	52	52	38.442	350
B2RUJ5	B2RUJ5		Apba1	>sp|B2RUJ5|APBA1_MOUSE Amyloid beta A4 precursor protein-binding family A member 1 OS=Mus musculus GN=Apba1 PE=2 SV=2	1	1	1	1	1	1	1	0	0	0	1	1	1	0	0	0	1	1	1	0	0	0	1	1	1	0	0	0	1	1	1	0	0	0	1	1	1	0	0	0	3	3	3	92.908	842
B2RUK2;Q80TH2-2;B7ZNX6;Q80TH2;Q80TH2-1;B2RUJ2;E9Q6L9;Q80TE7;B9EHV0	B2RUK2;Q80TH2-2;B7ZNX6;Q80TH2;Q80TH2-1;B2RUJ2	Protein LAP2	Erbb2ip	>tr|B2RUK2|B2RUK2_MOUSE Erbb2 interacting protein OS=Mus musculus GN=Erbb2ip PE=2 SV=1;>sp|Q80TH2-2|LAP2_MOUSE Isoform 2 of Protein LAP2 OS=Mus musculus GN=Erbb2ip;>tr|B7ZNX6|B7ZNX6_MOUSE Erbb2ip protein OS=Mus musculus GN=Erbb2ip PE=2 SV=1;>sp|Q80TH2|LAP2	9	46	46	46	28	28	29	36	32	33	24	23	27	32	31	34	28	28	29	36	32	33	24	23	27	32	31	34	28	28	29	36	32	33	24	23	27	32	31	34	42.4	42.4	42.4	162.18	1450
B2RUK5;Q3ULD5;Q6PD20;F6ZNH0;Q8K1L7	B2RUK5;Q3ULD5;Q6PD20	Methylcrotonoyl-CoA carboxylase beta chain, mitochondrial	Mccc2	>tr|B2RUK5|B2RUK5_MOUSE Methylcrotonoyl-Coenzyme A carboxylase 2 (Beta) OS=Mus musculus GN=Mccc2 PE=2 SV=1;>sp|Q3ULD5|MCCB_MOUSE Methylcrotonoyl-CoA carboxylase beta chain, mitochondrial OS=Mus musculus GN=Mccc2 PE=2 SV=1;>tr|Q6PD20|Q6PD20_MOUSE Mccc2 prot	5	19	19	19	13	14	14	9	6	8	14	17	14	9	12	11	13	14	14	9	6	8	14	17	14	9	12	11	13	14	14	9	6	8	14	17	14	9	12	11	41.7	41.7	41.7	61.378	563
B2RUM8;Q8K363;F6ZX28	B2RUM8;Q8K363	ATP-dependent RNA helicase DDX18	Ddx18	>tr|B2RUM8|B2RUM8_MOUSE DEAD (Asp-Glu-Ala-Asp) box polypeptide 18 OS=Mus musculus GN=Ddx18 PE=2 SV=1;>sp|Q8K363|DDX18_MOUSE ATP-dependent RNA helicase DDX18 OS=Mus musculus GN=Ddx18 PE=2 SV=1	3	11	11	11	4	5	6	1	1	0	7	7	9	1	0	1	4	5	6	1	1	0	7	7	9	1	0	1	4	5	6	1	1	0	7	7	9	1	0	1	20.5	20.5	20.5	74.18	660
B2RUR0;O35601;O35601-2	B2RUR0;O35601;O35601-2	FYN-binding protein	Fyb	>tr|B2RUR0|B2RUR0_MOUSE FYN binding protein OS=Mus musculus GN=Fyb PE=2 SV=1;>sp|O35601|FYB_MOUSE FYN-binding protein OS=Mus musculus GN=Fyb PE=1 SV=2;>sp|O35601-2|FYB_MOUSE Isoform FYB-120 of FYN-binding protein OS=Mus musculus GN=Fyb	3	1	1	1	1	0	0	0	0	0	1	1	1	1	1	1	1	0	0	0	0	0	1	1	1	1	1	1	1	0	0	0	0	0	1	1	1	1	1	1	1.5	1.5	1.5	90.054	819
B2RUR3;P06795	B2RUR3;P06795	Multidrug resistance protein 1B	Abcb1b	>tr|B2RUR3|B2RUR3_MOUSE ATP-binding cassette, sub-family B (MDR/TAP), member 1B OS=Mus musculus GN=Abcb1b PE=2 SV=1;>sp|P06795|MDR1B_MOUSE Multidrug resistance protein 1B OS=Mus musculus GN=Abcb1b PE=1 SV=1	2	32	3	3	22	22	23	26	21	27	23	25	24	28	29	28	1	2	3	1	0	1	1	2	1	2	2	2	1	2	3	1	0	1	1	2	1	2	2	2	30.3	2.2	2.2	140.99	1276
B2RUR8	B2RUR8		Otud7b	>tr|B2RUR8|B2RUR8_MOUSE OTU domain containing 7B OS=Mus musculus GN=Otud7b PE=2 SV=1	1	2	2	2	2	2	1	1	1	1	2	2	2	1	0	0	2	2	1	1	1	1	2	2	2	1	0	0	2	2	1	1	1	1	2	2	2	1	0	0	3.8	3.8	3.8	91.982	840
B2RV69;Q5SYH2	B2RV69;Q5SYH2	Transmembrane protein 199	Tmem199	>tr|B2RV69|B2RV69_MOUSE Expressed sequence AI316787 OS=Mus musculus GN=Tmem199 PE=2 SV=1;>sp|Q5SYH2|TM199_MOUSE Transmembrane protein 199 OS=Mus musculus GN=Tmem199 PE=2 SV=1	2	3	3	3	0	2	2	1	0	1	1	0	2	2	2	2	0	2	2	1	0	1	1	0	2	2	2	2	0	2	2	1	0	1	1	0	2	2	2	2	27.4	27.4	27.4	23.099	208
B2RV71;Q9D1I2;Q80VN1	B2RV71;Q9D1I2	Bcl10-interacting CARD protein	1110007C09Rik	>tr|B2RV71|B2RV71_MOUSE RIKEN cDNA 1110007C09 gene OS=Mus musculus GN=1110007C09Rik PE=2 SV=1;>sp|Q9D1I2|BINCA_MOUSE Bcl10-interacting CARD protein OS=Mus musculus PE=2 SV=1	3	6	6	6	6	6	6	4	2	3	6	5	6	2	2	3	6	6	6	4	2	3	6	5	6	2	2	3	6	6	6	4	2	3	6	5	6	2	2	3	37.7	37.7	37.7	20.936	183
B2RV73;Q8VHI3	B2RV73;Q8VHI3	GDP-fucose protein O-fucosyltransferase 2	Pofut2	>tr|B2RV73|B2RV73_MOUSE Protein O-fucosyltransferase 2 OS=Mus musculus GN=Pofut2 PE=2 SV=1;>sp|Q8VHI3|OFUT2_MOUSE GDP-fucose protein O-fucosyltransferase 2 OS=Mus musculus GN=Pofut2 PE=2 SV=1	2	4	4	4	4	4	4	1	0	0	3	4	2	1	1	1	4	4	4	1	0	0	3	4	2	1	1	1	4	4	4	1	0	0	3	4	2	1	1	1	11.2	11.2	11.2	49.429	429
B2RVB9	B2RVB9		4930420K17Rik	>tr|B2RVB9|B2RVB9_MOUSE MCG1490, isoform CRA_b OS=Mus musculus GN=4930420K17Rik PE=4 SV=1	1	5	5	5	3	3	3	4	5	5	2	2	2	3	5	5	3	3	3	4	5	5	2	2	2	3	5	5	3	3	3	4	5	5	2	2	2	3	5	5	22	22	22	13.391	118
B2RVF0;P22752;Q8CGP5;Q8CGP7;A3KPD0;Q8CGP6;Q8CGP4	B2RVF0;P22752;Q8CGP5;Q8CGP7;A3KPD0;Q8CGP6;Q8CGP4	Histone H2A;Histone H2A type 1;Histone H2A type 1-F;Histone H2A type 1-K;Histone H2A type 1-H	Hist1h2ad;Hist1h2ab;Hist1h2af;Hist1h2ak;Hist1h2ah;Hist1h2aa	>tr|B2RVF0|B2RVF0_MOUSE Histone H2A OS=Mus musculus GN=Hist1h2ad PE=2 SV=1;>sp|P22752|H2A1_MOUSE Histone H2A type 1 OS=Mus musculus GN=Hist1h2ab PE=1 SV=3;>sp|Q8CGP5|H2A1F_MOUSE Histone H2A type 1-F OS=Mus musculus GN=Hist1h2af PE=1 SV=3;>sp|Q8CGP7|H2A1K_M	7	12	12	1	7	9	9	7	6	8	9	8	9	10	11	10	7	9	9	7	6	8	9	8	9	10	11	10	0	1	1	0	0	0	1	1	1	1	1	1	72.3	72.3	16.2	14.135	130
B2RVI6;Q9CZ92;Q9CZ92-2	B2RVI6;Q9CZ92;Q9CZ92-2	Centromere protein P	Cenpp	>tr|B2RVI6|B2RVI6_MOUSE Centromere protein P OS=Mus musculus GN=Cenpp PE=2 SV=1;>sp|Q9CZ92|CENPP_MOUSE Centromere protein P OS=Mus musculus GN=Cenpp PE=2 SV=1;>sp|Q9CZ92-2|CENPP_MOUSE Isoform 2 of Centromere protein P OS=Mus musculus GN=Cenpp	3	3	3	3	1	0	1	0	0	0	2	2	1	0	0	0	1	0	1	0	0	0	2	2	1	0	0	0	1	0	1	0	0	0	2	2	1	0	0	0	11.5	11.5	11.5	33.288	286
B2RVP5;P0C0S6;Q3THW5;Q3UA95;Q5NC91;Q8R029;G3UWL7	B2RVP5;P0C0S6;Q3THW5;Q3UA95;Q5NC91;Q8R029	Histone H2A;Histone H2A.Z;Histone H2A.V	H2afv;H2afz	>tr|B2RVP5|B2RVP5_MOUSE Histone H2A OS=Mus musculus GN=H2afv PE=2 SV=1;>sp|P0C0S6|H2AZ_MOUSE Histone H2A.Z OS=Mus musculus GN=H2afz PE=1 SV=2;>sp|Q3THW5|H2AV_MOUSE Histone H2A.V OS=Mus musculus GN=H2afv PE=1 SV=3;>tr|Q3UA95|Q3UA95_MOUSE Histone H2A OS=Mus	7	6	4	4	6	6	6	4	4	4	6	6	6	5	6	5	4	4	4	2	2	2	4	4	4	3	4	3	4	4	4	2	2	2	4	4	4	3	4	3	45.3	45.3	45.3	13.509	128
B2RVQ1;Q9CQG6;Q9CQG6-2	B2RVQ1;Q9CQG6	Transmembrane protein 147	Tmem147	>tr|B2RVQ1|B2RVQ1_MOUSE Transmembrane protein 147 OS=Mus musculus GN=Tmem147 PE=2 SV=1;>sp|Q9CQG6|TM147_MOUSE Transmembrane protein 147 OS=Mus musculus GN=Tmem147 PE=2 SV=1	3	3	3	3	3	3	2	2	2	3	2	3	3	3	3	3	3	3	2	2	2	3	2	3	3	3	3	3	3	3	2	2	2	3	2	3	3	3	3	3	12.5	12.5	12.5	25.335	224
B2RWH3;Q6GSS7;Q149V4;Q64523;F8WIX8	B2RWH3;Q6GSS7;Q149V4;Q64523;F8WIX8	Histone H2A;Histone H2A type 2-A;Histone H2A type 2-C	Hist2h2aa1;Hist2h2ac;Hist1h2al	>tr|B2RWH3|B2RWH3_MOUSE Histone H2A OS=Mus musculus GN=Hist2h2aa1 PE=2 SV=1;>sp|Q6GSS7|H2A2A_MOUSE Histone H2A type 2-A OS=Mus musculus GN=Hist2h2aa1 PE=1 SV=3;>tr|Q149V4|Q149V4_MOUSE Histone H2A OS=Mus musculus GN=Hist2h2ac PE=2 SV=1;>sp|Q64523|H2A2C_MOUS	5	12	3	1	6	8	7	5	4	6	10	9	9	8	10	9	1	0	0	0	0	0	2	2	2	1	2	2	1	0	0	0	0	0	1	1	1	1	1	1	76.9	45.4	15.4	14.095	130
B2RWI2;Q9EP89	B2RWI2;Q9EP89	Serine beta-lactamase-like protein LACTB, mitochondrial	Lactb	>tr|B2RWI2|B2RWI2_MOUSE Lactamase, beta OS=Mus musculus GN=Lactb PE=2 SV=1;>sp|Q9EP89|LACTB_MOUSE Serine beta-lactamase-like protein LACTB, mitochondrial OS=Mus musculus GN=Lactb PE=1 SV=1	2	16	16	16	9	11	13	7	3	5	11	12	13	8	9	10	9	11	13	7	3	5	11	12	13	8	9	10	9	11	13	7	3	5	11	12	13	8	9	10	35.9	35.9	35.9	60.705	551
B2RWS0;Q99N03;Q99N03-2	B2RWS0;Q99N03;Q99N03-2	Membrane-spanning 4-domains subfamily A member 10	Ms4a10	>tr|B2RWS0|B2RWS0_MOUSE Membrane-spanning 4-domains, subfamily A, member 10 OS=Mus musculus GN=Ms4a10 PE=2 SV=1;>sp|Q99N03|M4A10_MOUSE Membrane-spanning 4-domains subfamily A member 10 OS=Mus musculus GN=Ms4a10 PE=2 SV=1;>sp|Q99N03-2|M4A10_MOUSE Isoform 2	3	11	11	11	6	5	6	9	8	10	4	4	4	9	10	10	6	5	6	9	8	10	4	4	4	9	10	10	6	5	6	9	8	10	4	4	4	9	10	10	60.7	60.7	60.7	28.971	267
B2RWS6;E9PYJ8	B2RWS6;E9PYJ8	Histone acetyltransferase p300	Ep300	>sp|B2RWS6|EP300_MOUSE Histone acetyltransferase p300 OS=Mus musculus GN=Ep300 PE=1 SV=1;>tr|E9PYJ8|E9PYJ8_MOUSE Histone acetyltransferase p300 OS=Mus musculus GN=Ep300 PE=4 SV=1	2	10	5	5	9	5	7	0	0	1	5	3	6	2	0	1	5	2	4	0	0	1	3	2	3	1	0	1	5	2	4	0	0	1	3	2	3	1	0	1	5.9	3.8	3.8	263.76	2415
B2RX12;B2RX12-2;B2RX12-3	B2RX12;B2RX12-2;B2RX12-3	Canalicular multispecific organic anion transporter 2	Abcc3	>sp|B2RX12|MRP3_MOUSE Canalicular multispecific organic anion transporter 2 OS=Mus musculus GN=Abcc3 PE=1 SV=1;>sp|B2RX12-2|MRP3_MOUSE Isoform 2 of Canalicular multispecific organic anion transporter 2 OS=Mus musculus GN=Abcc3;>sp|B2RX12-3|MRP3_MOUSE Isofo	3	52	52	48	32	29	33	43	37	38	32	34	34	46	46	45	32	29	33	43	37	38	32	34	34	46	46	45	30	26	31	41	35	36	29	31	33	43	42	41	42.8	42.8	40.2	169.12	1523
B2RX66;Q5F2E8	B2RX66;Q5F2E8	Serine/threonine-protein kinase TAO1	Taok1	>tr|B2RX66|B2RX66_MOUSE MCG124812 OS=Mus musculus GN=Taok1 PE=2 SV=1;>sp|Q5F2E8|TAOK1_MOUSE Serine/threonine-protein kinase TAO1 OS=Mus musculus GN=Taok1 PE=1 SV=1	2	4	2	2	4	3	3	3	3	4	3	4	3	2	2	2	2	1	1	1	1	2	1	2	2	0	0	0	2	1	1	1	1	2	1	2	2	0	0	0	4.9	2.3	2.3	116.05	1001
B2RX77;Q9D483;Q9D483-2;F6QK97;D3YYS2	B2RX77;Q9D483	DNA-directed RNA polymerase III subunit RPC3	Polr3c	>tr|B2RX77|B2RX77_MOUSE MCG14870 OS=Mus musculus GN=Polr3c PE=2 SV=1;>sp|Q9D483|RPC3_MOUSE DNA-directed RNA polymerase III subunit RPC3 OS=Mus musculus GN=Polr3c PE=2 SV=1	5	3	3	3	3	2	3	1	1	0	2	1	2	1	0	0	3	2	3	1	1	0	2	1	2	1	0	0	3	2	3	1	1	0	2	1	2	1	0	0	5.4	5.4	5.4	60.705	533
B2RXC1;B2RXC1-2	B2RXC1	Trafficking protein particle complex subunit 11	Trappc11	>sp|B2RXC1|TPC11_MOUSE Trafficking protein particle complex subunit 11 OS=Mus musculus GN=Trappc11 PE=2 SV=1	2	20	20	20	9	8	7	9	6	7	14	15	14	13	13	13	9	8	7	9	6	7	14	15	14	13	13	13	9	8	7	9	6	7	14	15	14	13	13	13	23.3	23.3	23.3	128.39	1133
B2RXC6	B2RXC6	DNA-directed RNA polymerase	Polr3a	>tr|B2RXC6|B2RXC6_MOUSE DNA-directed RNA polymerase OS=Mus musculus GN=Polr3a PE=2 SV=1	1	4	4	4	2	3	2	0	1	0	2	3	3	0	0	0	2	3	2	0	1	0	2	3	3	0	0	0	2	3	2	0	1	0	2	3	3	0	0	0	3.1	3.1	3.1	155.74	1390
B2RXM7;Q9D1J3	B2RXM7;Q9D1J3	SAP domain-containing ribonucleoprotein	Sarnp	>tr|B2RXM7|B2RXM7_MOUSE MCG113697 OS=Mus musculus GN=Sarnp PE=2 SV=1;>sp|Q9D1J3|SARNP_MOUSE SAP domain-containing ribonucleoprotein OS=Mus musculus GN=Sarnp PE=1 SV=3	2	12	12	12	11	9	12	4	3	1	7	10	11	3	1	3	11	9	12	4	3	1	7	10	11	3	1	3	11	9	12	4	3	1	7	10	11	3	1	3	54.3	54.3	54.3	23.532	210
B2RXQ8;Q8BFQ4	B2RXQ8;Q8BFQ4	WD repeat-containing protein 82	Wdr82	>tr|B2RXQ8|B2RXQ8_MOUSE MCG19514, isoform CRA_a OS=Mus musculus GN=Wdr82 PE=2 SV=1;>sp|Q8BFQ4|WDR82_MOUSE WD repeat-containing protein 82 OS=Mus musculus GN=Wdr82 PE=1 SV=1	2	10	10	10	5	5	5	3	1	6	8	7	7	7	6	5	5	5	5	3	1	6	8	7	7	7	6	5	5	5	5	3	1	6	8	7	7	7	6	5	41.9	41.9	41.9	35.079	313
B2RXS4;E9Q832;E9PY77;Q9QZC2	B2RXS4;E9Q832	Plexin-B2	Plxnb2	>sp|B2RXS4|PLXB2_MOUSE Plexin-B2 OS=Mus musculus GN=Plxnb2 PE=1 SV=1;>tr|E9Q832|E9Q832_MOUSE Plexin-B2 OS=Mus musculus GN=Plxnb2 PE=4 SV=1	4	60	60	57	28	30	31	42	33	44	31	31	34	44	45	49	28	30	31	42	33	44	31	31	34	44	45	49	27	28	29	41	33	43	29	28	32	42	43	46	42.5	42.5	41.7	206.23	1842
B2RXV4	B2RXV4		Mfsd7b	>tr|B2RXV4|B2RXV4_MOUSE Major facilitator superfamily domain containing 7B OS=Mus musculus GN=Mfsd7b PE=2 SV=1	1	10	10	10	5	6	5	9	8	8	6	5	6	9	9	9	5	6	5	9	8	8	6	5	6	9	9	9	5	6	5	9	8	8	6	5	6	9	9	9	28.6	28.6	28.6	60.468	560
B2RXX4;D3Z1C0;Q6ZPE2;D6RG52;H3BKD9;REV__A4Q9F6;REV__D3YXQ9;F6S251	B2RXX4;D3Z1C0;Q6ZPE2	Myotubularin-related protein 5	Sbf1	>tr|B2RXX4|B2RXX4_MOUSE Myotubularin-related protein 5 OS=Mus musculus GN=Sbf1 PE=2 SV=1;>tr|D3Z1C0|D3Z1C0_MOUSE Myotubularin-related protein 5 OS=Mus musculus GN=Sbf1 PE=4 SV=1;>sp|Q6ZPE2|MTMR5_MOUSE Myotubularin-related protein 5 OS=Mus musculus GN=Sbf1	8	29	29	23	13	10	16	8	7	8	15	15	19	8	12	10	13	10	16	8	7	8	15	15	19	8	12	10	12	7	13	6	5	6	12	13	15	6	10	7	18.5	18.5	15.4	211.43	1893
B2RXY7;P48758	B2RXY7;P48758	Carbonyl reductase [NADPH] 1	Cbr1	>tr|B2RXY7|B2RXY7_MOUSE Carbonyl reductase 1 OS=Mus musculus GN=Cbr1 PE=2 SV=1;>sp|P48758|CBR1_MOUSE Carbonyl reductase [NADPH] 1 OS=Mus musculus GN=Cbr1 PE=1 SV=3	2	24	24	23	19	18	20	16	14	16	21	21	21	24	21	23	19	18	20	16	14	16	21	21	21	24	21	23	18	17	19	16	14	16	20	20	20	23	20	22	91.3	91.3	86.6	30.641	277
B2RY04	B2RY04	Dedicator of cytokinesis protein 5	Dock5	>sp|B2RY04|DOCK5_MOUSE Dedicator of cytokinesis protein 5 OS=Mus musculus GN=Dock5 PE=1 SV=2	1	32	31	30	19	20	22	14	12	15	22	24	24	20	15	15	19	20	22	14	12	15	21	23	24	20	15	15	19	20	22	14	12	15	21	22	24	19	15	15	20.6	20.1	19.6	214.43	1868
B2RY56-2;B2RY56;B2RY56-3;REV__Q9R269;REV__G5E898	B2RY56-2;B2RY56	RNA-binding protein 25	Rbm25	>sp|B2RY56-2|RBM25_MOUSE Isoform 2 of RNA-binding protein 25 OS=Mus musculus GN=Rbm25;>sp|B2RY56|RBM25_MOUSE RNA-binding protein 25 OS=Mus musculus GN=Rbm25 PE=1 SV=1	5	31	31	31	25	23	25	5	4	2	26	25	28	8	7	7	25	23	25	5	4	2	26	25	28	8	7	7	25	23	25	5	4	2	26	25	28	8	7	7	36.4	36.4	36.4	99.551	838
B2ZRS3;Q570Y9;B2ZRS7;Q570Y9-2;B2ZRS5;Q570Y9-3	B2ZRS3;Q570Y9;B2ZRS7;Q570Y9-2;B2ZRS5;Q570Y9-3	DEP domain-containing mTOR-interacting protein	Deptor	>tr|B2ZRS3|B2ZRS3_MOUSE Depdc6-001 OS=Mus musculus GN=Deptor PE=4 SV=1;>sp|Q570Y9|DPTOR_MOUSE DEP domain-containing mTOR-interacting protein OS=Mus musculus GN=Deptor PE=1 SV=2;>tr|B2ZRS7|B2ZRS7_MOUSE Depdc6-003 OS=Mus musculus GN=Deptor PE=4 SV=1;>sp|Q570	6	10	10	10	6	5	6	2	3	4	5	4	5	2	4	3	6	5	6	2	3	4	5	4	5	2	4	3	6	5	6	2	3	4	5	4	5	2	4	3	30.8	30.8	30.8	46.119	409
B3RH23;P48678	B3RH23;P48678	Prelamin-A/C;Lamin-A/C	Lmna	>tr|B3RH23|B3RH23_MOUSE Lamin A OS=Mus musculus GN=Lmna PE=2 SV=1;>sp|P48678|LMNA_MOUSE Prelamin-A/C OS=Mus musculus GN=Lmna PE=1 SV=2	2	54	54	4	39	47	45	10	10	13	45	45	47	13	20	19	39	47	45	10	10	13	45	45	47	13	20	19	3	3	3	0	0	0	3	4	3	0	0	0	84.4	84.4	8.4	74.237	665
B3RH24;P48678-2;P48678-3;D3YUF7	B3RH24;P48678-2;P48678-3		Lmna	>tr|B3RH24|B3RH24_MOUSE Lamin C OS=Mus musculus GN=Lmna PE=2 SV=1;>sp|P48678-2|LMNA_MOUSE Isoform C of Prelamin-A/C OS=Mus musculus GN=Lmna;>sp|P48678-3|LMNA_MOUSE Isoform C2 of Prelamin-A/C OS=Mus musculus GN=Lmna	4	51	1	1	36	44	43	10	10	13	42	41	45	13	20	19	0	0	1	0	0	0	0	0	1	0	0	0	0	0	1	0	0	0	0	0	1	0	0	0	89.5	5.6	5.6	65.445	574
B3VQI8;Q61462;Q61462-2	B3VQI8;Q61462;Q61462-2	Cytochrome b-245 light chain	Cyba	>tr|B3VQI8|B3VQI8_MOUSE Cytochrome b-245, alpha polypeptide, isoform CRA_a OS=Mus musculus GN=Cyba PE=2 SV=1;>sp|Q61462|CY24A_MOUSE Cytochrome b-245 light chain OS=Mus musculus GN=Cyba PE=1 SV=3;>sp|Q61462-2|CY24A_MOUSE Isoform 2 of Cytochrome b-245 light	3	5	5	5	3	2	3	4	3	3	1	1	1	4	3	4	3	2	3	4	3	3	1	1	1	4	3	4	3	2	3	4	3	3	1	1	1	4	3	4	26	26	26	20.748	192
B5THE2;F6VM63	B5THE2		Mgam	>tr|B5THE2|B5THE2_MOUSE Maltase-glucoamylase OS=Mus musculus GN=Mgam PE=2 SV=1	2	90	87	87	64	61	71	71	62	74	66	66	68	80	83	82	63	60	69	69	61	71	64	64	67	77	80	79	63	60	69	69	61	71	64	64	67	77	80	79	57.4	56	56	208.55	1827
B6DQM2;Q5F2F2	B6DQM2;Q5F2F2	Abhydrolase domain-containing protein 15	Abhd15	>tr|B6DQM2|B6DQM2_MOUSE Alpha/beta hydrolase OS=Mus musculus GN=Abhd15 PE=2 SV=1;>sp|Q5F2F2|ABH15_MOUSE Abhydrolase domain-containing protein 15 OS=Mus musculus GN=Abhd15 PE=2 SV=1	2	2	2	2	2	0	0	0	0	0	2	1	1	0	0	0	2	0	0	0	0	0	2	1	1	0	0	0	2	0	0	0	0	0	2	1	1	0	0	0	6.5	6.5	6.5	51.151	459
B6YY24;Q3UVG3;REV__Q3V0J4;REV__Q9CUG5	B6YY24;Q3UVG3	Protein FAM91A1	D15Ertd621e;Fam91a1	>tr|B6YY24|B6YY24_MOUSE DNA segment, Chr 15, ERATO Doi 621, expressed, isoform CRA_a OS=Mus musculus GN=D15Ertd621e PE=2 SV=1;>sp|Q3UVG3|F91A1_MOUSE Protein FAM91A1 OS=Mus musculus GN=Fam91a1 PE=1 SV=1	4	7	7	7	5	3	5	3	3	3	4	4	3	2	1	3	5	3	5	3	3	3	4	4	3	2	1	3	5	3	5	3	3	3	4	4	3	2	1	3	10.3	10.3	10.3	93.462	837
B7ZCC2	B7ZCC2		Aim1l	>tr|B7ZCC2|B7ZCC2_MOUSE Absent in melanoma 1-like OS=Mus musculus GN=Aim1l PE=4 SV=1	1	17	17	17	10	6	12	5	4	5	6	9	9	5	4	7	10	6	12	5	4	5	6	9	9	5	4	7	10	6	12	5	4	5	6	9	9	5	4	7	17.3	17.3	17.3	164.16	1516
B7ZCJ1;B7ZCJ0;Q6DFV3;E9Q570;G3UWM5	B7ZCJ1;B7ZCJ0;Q6DFV3;E9Q570;G3UWM5	Rho GTPase-activating protein 21	Arhgap21	>tr|B7ZCJ1|B7ZCJ1_MOUSE Rho GTPase activating protein 21 OS=Mus musculus GN=Arhgap21 PE=4 SV=1;>tr|B7ZCJ0|B7ZCJ0_MOUSE Rho GTPase activating protein 21 OS=Mus musculus GN=Arhgap21 PE=4 SV=1;>sp|Q6DFV3|RHG21_MOUSE Rho GTPase-activating protein 21 OS=Mus mus	5	3	3	3	2	2	3	1	1	1	2	2	3	2	2	2	2	2	3	1	1	1	2	2	3	2	2	2	2	2	3	1	1	1	2	2	3	2	2	2	1.9	1.9	1.9	216.98	1955
B7ZCR2;Q91YL3;D6RJ84;F6V4H6;B7ZCR1;F7CAK3	B7ZCR2;Q91YL3;D6RJ84	Uridine kinase;Uridine-cytidine kinase-like 1	Uckl1	>tr|B7ZCR2|B7ZCR2_MOUSE Uridine kinase OS=Mus musculus GN=Uckl1 PE=3 SV=1;>sp|Q91YL3|UCKL1_MOUSE Uridine-cytidine kinase-like 1 OS=Mus musculus GN=Uckl1 PE=1 SV=1;>tr|D6RJ84|D6RJ84_MOUSE Uridine kinase OS=Mus musculus GN=Uckl1 PE=3 SV=1	6	8	8	8	6	5	5	2	2	2	6	7	5	3	4	2	6	5	5	2	2	2	6	7	5	3	4	2	6	5	5	2	2	2	6	7	5	3	4	2	17	17	17	60.841	548
B7ZCT9;Q8CBW3;B7ZCU0;Q3TJ64;Q8CBW3-3;Q3TJR5;Q8CBW3-4;B7ZCU3;B7ZCU4;Q3TPY5;Q8CBW3-2;B7ZCU5;B7ZCU2;B7ZCU1;Q8CBW3-5;Q6AXD2;P62484	B7ZCT9;Q8CBW3;B7ZCU0;Q3TJ64;Q8CBW3-3;Q3TJR5;Q8CBW3-4;B7ZCU3;B7ZCU4;Q3TPY5;Q8CBW3-2;B7ZCU5;B7ZCU2;B7ZCU1;Q8CBW3-5	Abl interactor 1	Abi1	>tr|B7ZCT9|B7ZCT9_MOUSE Abl-interactor 1 OS=Mus musculus GN=Abi1 PE=4 SV=1;>sp|Q8CBW3|ABI1_MOUSE Abl interactor 1 OS=Mus musculus GN=Abi1 PE=1 SV=3;>tr|B7ZCU0|B7ZCU0_MOUSE Abl interactor 1 OS=Mus musculus GN=Abi1 PE=4 SV=1;>tr|Q3TJ64|Q3TJ64_MOUSE Abl-inter	17	18	18	18	12	11	14	11	9	9	11	12	13	7	6	7	12	11	14	11	9	9	11	12	13	7	6	7	12	11	14	11	9	9	11	12	13	7	6	7	39.7	39.7	39.7	52.287	481
B7ZMR0;Q76LS9;Q76LS9-2;Q76LS9-3	B7ZMR0;Q76LS9;Q76LS9-2	Protein FAM63A	Fam63a	>tr|B7ZMR0|B7ZMR0_MOUSE Fam63a protein OS=Mus musculus GN=Fam63a PE=2 SV=1;>sp|Q76LS9|FA63A_MOUSE Protein FAM63A OS=Mus musculus GN=Fam63a PE=1 SV=1;>sp|Q76LS9-2|FA63A_MOUSE Isoform 2 of Protein FAM63A OS=Mus musculus GN=Fam63a	4	6	6	6	6	5	5	2	2	2	4	4	4	1	1	2	6	5	5	2	2	2	4	4	4	1	1	2	6	5	5	2	2	2	4	4	4	1	1	2	20.5	20.5	20.5	51.225	468
B7ZMR9;Q0VEE6;D3YV79;D3YZL3	B7ZMR9;Q0VEE6;D3YV79;D3YZL3	Zinc finger protein 800	Zfp800;Znf800	>tr|B7ZMR9|B7ZMR9_MOUSE MCG12507, isoform CRA_a OS=Mus musculus GN=Zfp800 PE=2 SV=1;>sp|Q0VEE6|ZN800_MOUSE Zinc finger protein 800 OS=Mus musculus GN=Znf800 PE=1 SV=1;>tr|D3YV79|D3YV79_MOUSE Protein Zfp800 (Fragment) OS=Mus musculus GN=Zfp800 PE=4 SV=1;>tr	4	1	1	1	0	0	0	0	0	0	1	1	1	0	0	0	0	0	0	0	0	0	1	1	1	0	0	0	0	0	0	0	0	0	1	1	1	0	0	0	2.3	2.3	2.3	74.812	662
B7ZN11;Q8C398	B7ZN11;Q8C398	Phosphatidylinositol-glycan biosynthesis class W protein	Pigw	>tr|B7ZN11|B7ZN11_MOUSE Phosphatidylinositol glycan anchor biosynthesis, class W, isoform CRA_a OS=Mus musculus GN=Pigw PE=2 SV=1;>sp|Q8C398|PIGW_MOUSE Phosphatidylinositol-glycan biosynthesis class W protein OS=Mus musculus GN=Pigw PE=2 SV=1	2	1	1	1	1	1	1	0	0	0	1	0	0	0	1	0	1	1	1	0	0	0	1	0	0	0	1	0	1	1	1	0	0	0	1	0	0	0	1	0	2.4	2.4	2.4	56.84	503
B7ZN28;Q9EPX2	B7ZN28;Q9EPX2	Papilin	Papln	>tr|B7ZN28|B7ZN28_MOUSE Papilin OS=Mus musculus GN=Papln PE=2 SV=1;>sp|Q9EPX2|PPN_MOUSE Papilin OS=Mus musculus GN=Papln PE=2 SV=2	2	18	18	18	12	14	14	2	1	2	9	10	18	2	4	3	12	14	14	2	1	2	9	10	18	2	4	3	12	14	14	2	1	2	9	10	18	2	4	3	20	20	20	141.37	1302
B7ZNJ8;Q8BP97;Q8BP97-2;Q5SUT8;Q5SUT9;Q5SUU0	B7ZNJ8;Q8BP97;Q8BP97-2	Rhomboid domain-containing protein 3	Rhbdd3	>tr|B7ZNJ8|B7ZNJ8_MOUSE Rhbdd3 protein OS=Mus musculus GN=Rhbdd3 PE=2 SV=1;>sp|Q8BP97|RHBD3_MOUSE Rhomboid domain-containing protein 3 OS=Mus musculus GN=Rhbdd3 PE=2 SV=1;>sp|Q8BP97-2|RHBD3_MOUSE Isoform 2 of Rhomboid domain-containing protein 3 OS=Mus mus	6	4	4	4	1	2	2	3	1	2	4	1	3	3	3	3	1	2	2	3	1	2	4	1	3	3	3	3	1	2	2	3	1	2	4	1	3	3	3	3	14.8	14.8	14.8	40.933	385
B7ZNL8;Q91VU7;Q3ULP8;F7AC41;F7CG42;F6XMS4	B7ZNL8;Q91VU7;Q3ULP8;F7AC41		Pus7	>tr|B7ZNL8|B7ZNL8_MOUSE Protein Pus7 OS=Mus musculus GN=Pus7 PE=2 SV=1;>tr|Q91VU7|Q91VU7_MOUSE Protein Pus7 OS=Mus musculus GN=Pus7 PE=2 SV=2;>tr|Q3ULP8|Q3ULP8_MOUSE Protein Pus7 OS=Mus musculus GN=Pus7 PE=2 SV=1;>tr|F7AC41|F7AC41_MOUSE Protein Pus7 (Fragm	6	7	7	7	5	4	6	0	0	0	5	6	5	1	1	0	5	4	6	0	0	0	5	6	5	1	1	0	5	4	6	0	0	0	5	6	5	1	1	0	17	17	17	75.39	666
B7ZNM7;Q9Z2Q6;Q52KH2	B7ZNM7;Q9Z2Q6;Q52KH2	Septin-5	2013-09-05	>tr|B7ZNM7|B7ZNM7_MOUSE Sept5 protein OS=Mus musculus GN=Sept5 PE=2 SV=1;>sp|Q9Z2Q6|SEPT5_MOUSE Septin-5 OS=Mus musculus GN=Sept5 PE=1 SV=2;>tr|Q52KH2|Q52KH2_MOUSE Sept5 protein (Fragment) OS=Mus musculus GN=Sept5 PE=2 SV=1	3	20	20	20	13	16	17	9	9	11	14	15	17	10	14	11	13	16	17	9	9	11	14	15	17	10	14	11	13	16	17	9	9	11	14	15	17	10	14	11	67.5	67.5	67.5	44.08	381
B7ZNP2;Q3V4B5;B7ZNP3	B7ZNP2;Q3V4B5;B7ZNP3	COMM domain-containing protein 6	Commd6	>tr|B7ZNP2|B7ZNP2_MOUSE COMM domain containing 6 OS=Mus musculus GN=Commd6 PE=4 SV=1;>sp|Q3V4B5|COMD6_MOUSE COMM domain-containing protein 6 OS=Mus musculus GN=Commd6 PE=2 SV=1;>tr|B7ZNP3|B7ZNP3_MOUSE COMM domain-containing protein 6 OS=Mus musculus GN=Com	3	3	3	3	0	2	2	1	1	2	2	1	2	2	1	1	0	2	2	1	1	2	2	1	2	2	1	1	0	2	2	1	1	2	2	1	2	2	1	1	47.1	47.1	47.1	9.7951	87
B7ZNU9;Q542S9;Q61235	B7ZNU9;Q542S9;Q61235	Beta-2-syntrophin	Sntb2	>tr|B7ZNU9|B7ZNU9_MOUSE Beta-2-syntrophin OS=Mus musculus GN=Sntb2 PE=2 SV=1;>tr|Q542S9|Q542S9_MOUSE Syntrophin, basic 2 OS=Mus musculus GN=Sntb2 PE=2 SV=1;>sp|Q61235|SNTB2_MOUSE Beta-2-syntrophin OS=Mus musculus GN=Sntb2 PE=1 SV=2	3	14	14	14	9	7	6	9	8	7	8	6	7	10	9	7	9	7	6	9	8	7	8	6	7	10	9	7	9	7	6	9	8	7	8	6	7	10	9	7	30.7	30.7	30.7	57.427	531
B7ZWN4	B7ZWN4		Gm766	>tr|B7ZWN4|B7ZWN4_MOUSE Gm766 protein OS=Mus musculus GN=Gm766 PE=2 SV=1	1	13	13	13	11	10	12	7	4	7	12	12	13	7	10	6	11	10	12	7	4	7	12	12	13	7	10	6	11	10	12	7	4	7	12	12	13	7	10	6	54.8	54.8	54.8	33.497	290
B8JJ69;B8JJ66;F6X1P1;F6W3U3;B8JJ67	B8JJ69;B8JJ66;F6X1P1;F6W3U3		2310061I04Rik	>tr|B8JJ69|B8JJ69_MOUSE Novel protein (2310061I04Rik) OS=Mus musculus GN=2310061I04Rik PE=4 SV=1;>tr|B8JJ66|B8JJ66_MOUSE MCG141136, isoform CRA_a OS=Mus musculus GN=2310061I04Rik PE=4 SV=1;>tr|F6X1P1|F6X1P1_MOUSE Uncharacterized protein (Fragment) OS=Mus m	5	4	4	4	3	2	3	2	2	2	3	3	3	3	3	2	3	2	3	2	2	2	3	3	3	3	3	2	3	2	3	2	2	2	3	3	3	3	3	2	12.4	12.4	12.4	35.756	315
B8JJ99;Q9DCN1;Q9DCN1-2	B8JJ99;Q9DCN1;Q9DCN1-2	Peroxisomal NADH pyrophosphatase NUDT12	Nudt12	>tr|B8JJ99|B8JJ99_MOUSE Nudix (Nucleoside diphosphate linked moiety X)-type motif 12 OS=Mus musculus GN=Nudt12 PE=4 SV=1;>sp|Q9DCN1|NUD12_MOUSE Peroxisomal NADH pyrophosphatase NUDT12 OS=Mus musculus GN=Nudt12 PE=2 SV=1;>sp|Q9DCN1-2|NUD12_MOUSE Isoform 2 o	3	6	6	6	4	4	4	2	2	2	5	3	3	2	3	3	4	4	4	2	2	2	5	3	3	2	3	3	4	4	4	2	2	2	5	3	3	2	3	3	18.2	18.2	18.2	51.51	462
B8JJA3;Q3TV65;E0CXX6;F7BJW2	B8JJA3;Q3TV65;E0CXX6;F7BJW2	MPN domain-containing protein	Mpnd	>tr|B8JJA3|B8JJA3_MOUSE MPN domain containing OS=Mus musculus GN=Mpnd PE=4 SV=1;>sp|Q3TV65|MPND_MOUSE MPN domain-containing protein OS=Mus musculus GN=Mpnd PE=2 SV=2;>tr|E0CXX6|E0CXX6_MOUSE MPN domain-containing protein OS=Mus musculus GN=Mpnd PE=4 SV=1;>t	4	1	1	1	0	0	1	0	0	1	1	1	1	1	0	1	0	0	1	0	0	1	1	1	1	1	0	1	0	0	1	0	0	1	1	1	1	1	0	1	2.5	2.5	2.5	53.376	487
B8JJA8;P17665;E9Q463;G3X8T4	B8JJA8;P17665;E9Q463;G3X8T4	Cytochrome c oxidase subunit 7C, mitochondrial	Cox7c;Gm3386	>tr|B8JJA8|B8JJA8_MOUSE Cytochrome c oxidase, subunit VIIc OS=Mus musculus GN=Cox7c PE=4 SV=1;>sp|P17665|COX7C_MOUSE Cytochrome c oxidase subunit 7C, mitochondrial OS=Mus musculus GN=Cox7c PE=1 SV=1;>tr|E9Q463|E9Q463_MOUSE Uncharacterized protein OS=Mus mu	4	2	2	2	2	1	1	2	2	2	2	1	2	2	2	1	2	1	1	2	2	2	2	1	2	2	2	1	2	1	1	2	2	2	2	1	2	2	2	1	28.6	28.6	28.6	7.3325	63
B8JJB6;Q3TJD7;Q8BVJ7;B8JJB3;Q3TJD7-3;B8JJB2;B8JJB5;Q3TJD7-2;B8JJB1	B8JJB6;Q3TJD7	PDZ and LIM domain protein 7	Pdlim7	>tr|B8JJB6|B8JJB6_MOUSE PDZ and LIM domain 7 OS=Mus musculus GN=Pdlim7 PE=4 SV=1;>sp|Q3TJD7|PDLI7_MOUSE PDZ and LIM domain protein 7 OS=Mus musculus GN=Pdlim7 PE=2 SV=1	9	6	6	6	1	4	3	0	2	0	4	3	3	2	2	0	1	4	3	0	2	0	4	3	3	2	2	0	1	4	3	0	2	0	4	3	3	2	2	0	17.7	17.7	17.7	50.118	457
B8JJE0;Q8VHN7;G5E8P3;Q8VHN7-2;D3YYF1;Q8VHN7-4;Q8VHN7-5;F6QY07;F6X844	B8JJE0;Q8VHN7	G-protein coupled receptor 98	Gpr98	>tr|B8JJE0|B8JJE0_MOUSE G protein-coupled receptor 98 OS=Mus musculus GN=Gpr98 PE=4 SV=1;>sp|Q8VHN7|GPR98_MOUSE G-protein coupled receptor 98 OS=Mus musculus GN=Gpr98 PE=2 SV=1	9	4	4	4	1	1	1	3	2	2	1	1	1	1	2	4	1	1	1	3	2	2	1	1	1	1	2	4	1	1	1	3	2	2	1	1	1	1	2	4	0.5	0.5	0.5	687.6	6298
B8JJG1;Q3TJZ6	B8JJG1;Q3TJZ6	Protein FAM98A	Fam98a	>tr|B8JJG1|B8JJG1_MOUSE Novel protein (2810405J04Rik) OS=Mus musculus GN=Fam98a PE=4 SV=1;>sp|Q3TJZ6|FA98A_MOUSE Protein FAM98A OS=Mus musculus GN=Fam98a PE=2 SV=1	2	8	6	6	5	4	5	2	1	3	6	7	5	4	5	3	5	4	5	2	1	3	6	6	5	4	4	3	5	4	5	2	1	3	6	6	5	4	4	3	28.7	20.2	20.2	55.055	515
B8JJL8;Q9WU78-3;Q9WU78;E9QQ36;Q9WU78-2	B8JJL8;Q9WU78-3;Q9WU78	Programmed cell death 6-interacting protein	Pdcd6ip	>tr|B8JJL8|B8JJL8_MOUSE Programmed cell death 6 interacting protein OS=Mus musculus GN=Pdcd6ip PE=4 SV=1;>sp|Q9WU78-3|PDC6I_MOUSE Isoform 3 of Programmed cell death 6-interacting protein OS=Mus musculus GN=Pdcd6ip;>sp|Q9WU78|PDC6I_MOUSE Programmed cell dea	5	42	42	42	28	28	33	27	27	29	34	34	37	33	31	32	28	28	33	27	27	29	34	34	37	33	31	32	28	28	33	27	27	29	34	34	37	33	31	32	66	66	66	96.772	874
B8JJN0;B8JJM5;P04186;Q3UEG8;F6VQX8;B8JJM6;F6XQ00;H3BK95;F6W2T4;B8JJM3	B8JJN0;B8JJM5;P04186;Q3UEG8;F6VQX8;B8JJM6;F6XQ00	Complement factor B;Complement factor B Ba fragment;Complement factor B Bb fragment	Gm20547;Cfb	>tr|B8JJN0|B8JJN0_MOUSE Complement component 2 (Within H-2S) OS=Mus musculus GN=Gm20547 PE=3 SV=1;>tr|B8JJM5|B8JJM5_MOUSE Complement factor B OS=Mus musculus GN=Cfb PE=3 SV=1;>sp|P04186|CFAB_MOUSE Complement factor B OS=Mus musculus GN=Cfb PE=1 SV=2;>tr|Q3	10	9	9	8	4	7	6	4	4	3	3	2	3	4	3	3	4	7	6	4	4	3	3	2	3	4	3	3	3	6	5	3	3	2	2	1	2	3	2	2	7.9	7.9	6.6	142.32	1276
B8JJY5;Q8BTJ4;E9QLF5;Q8BTJ4-2;D3YYS8	B8JJY5;Q8BTJ4;E9QLF5;Q8BTJ4-2;D3YYS8	Ectonucleotide pyrophosphatase/phosphodiesterase family member 4	Enpp4	>tr|B8JJY5|B8JJY5_MOUSE Ectonucleotide pyrophosphatase/phosphodiesterase 4 OS=Mus musculus GN=Enpp4 PE=4 SV=1;>sp|Q8BTJ4|ENPP4_MOUSE Ectonucleotide pyrophosphatase/phosphodiesterase family member 4 OS=Mus musculus GN=Enpp4 PE=1 SV=1;>tr|E9QLF5|E9QLF5_MOUSE	5	6	5	5	0	1	1	3	3	4	1	1	1	5	5	5	0	1	1	3	3	4	1	1	0	5	4	4	0	1	1	3	3	4	1	1	0	5	4	4	18.4	16.2	16.2	51.611	456
B8JJY6;P61804	B8JJY6;P61804	Dolichyl-diphosphooligosaccharide--protein glycosyltransferase subunit DAD1	Dad1	>tr|B8JJY6|B8JJY6_MOUSE Defender against cell death 1 OS=Mus musculus GN=Dad1 PE=4 SV=1;>sp|P61804|DAD1_MOUSE Dolichyl-diphosphooligosaccharide--protein glycosyltransferase subunit DAD1 OS=Mus musculus GN=Dad1 PE=2 SV=3	2	5	5	5	4	4	4	5	4	5	5	5	5	5	5	5	4	4	4	5	4	5	5	5	5	5	5	5	4	4	4	5	4	5	5	5	5	5	5	5	37.2	37.2	37.2	12.497	113
B8JK30;Q9D0E1;Q3THB3;Q9D0E1-2;E9Q0P7	B8JK30;Q9D0E1;Q3THB3;Q9D0E1-2;E9Q0P7	Heterogeneous nuclear ribonucleoprotein M	Hnrnpm	>tr|B8JK30|B8JK30_MOUSE Heterogeneous nuclear ribonucleoprotein M OS=Mus musculus GN=Hnrnpm PE=4 SV=1;>sp|Q9D0E1|HNRPM_MOUSE Heterogeneous nuclear ribonucleoprotein M OS=Mus musculus GN=Hnrnpm PE=1 SV=3;>tr|Q3THB3|Q3THB3_MOUSE Heterogeneous nuclear ribonuc	5	50	50	3	42	42	46	29	25	32	37	40	46	29	32	29	42	42	46	29	25	32	37	40	46	29	32	29	2	2	2	2	2	3	3	3	3	2	2	1	78.9	78.9	4.3	77.648	729
B8JK32;B8JK33;F6W322;F7C9U3	B8JK32;B8JK33		Hnrnpm	>tr|B8JK32|B8JK32_MOUSE Heterogeneous nuclear ribonucleoprotein M OS=Mus musculus GN=Hnrnpm PE=4 SV=1;>tr|B8JK33|B8JK33_MOUSE Heterogeneous nuclear ribonucleoprotein M OS=Mus musculus GN=Hnrnpm PE=4 SV=1	4	47	1	1	39	39	44	26	23	28	34	37	43	26	29	27	0	0	1	0	0	0	1	1	1	0	0	0	0	0	1	0	0	0	1	1	1	0	0	0	79.2	1.2	1.2	72.069	679
B8JK39;E9QAP0	B8JK39;E9QAP0		Itga9	>tr|B8JK39|B8JK39_MOUSE Integrin alpha 9 OS=Mus musculus GN=Itga9 PE=3 SV=1;>tr|E9QAP0|E9QAP0_MOUSE Protein Itga9 OS=Mus musculus GN=Itga9 PE=4 SV=1	2	8	8	8	1	1	2	5	4	4	2	1	2	5	6	5	1	1	2	5	4	4	2	1	2	5	6	5	1	1	2	5	4	4	2	1	2	5	6	5	10.4	10.4	10.4	114.41	1036
B8JK44;Q99KJ0	B8JK44;Q99KJ0	UBX domain-containing protein 2A	Ubxn2a	>tr|B8JK44|B8JK44_MOUSE UBX domain containing 4 OS=Mus musculus GN=Ubxn2a PE=4 SV=1;>sp|Q99KJ0|UBX2A_MOUSE UBX domain-containing protein 2A OS=Mus musculus GN=Ubxn2a PE=2 SV=1	2	2	2	2	1	0	1	1	1	1	2	1	2	1	2	2	1	0	1	1	1	1	2	1	2	1	2	2	1	0	1	1	1	1	2	1	2	1	2	2	9.3	9.3	9.3	29.197	258
B8Q3N4	B8Q3N4		Insr	>tr|B8Q3N4|B8Q3N4_MOUSE Insulin receptor (Fragment) OS=Mus musculus GN=Insr PE=2 SV=1	1	4	1	1	2	3	4	3	2	3	4	3	4	3	3	3	0	1	1	1	1	1	1	1	1	1	1	1	0	1	1	1	1	1	1	1	1	1	1	1	23.2	6.7	6.7	25.389	224
B8QI33;B2RXW8;F6UCP8;E9Q6F1;Q3UJC0	B8QI33;B2RXW8		Ppfia1	>tr|B8QI33|B8QI33_MOUSE Liprin-alpha 1 OS=Mus musculus GN=Ppfia1 PE=2 SV=1;>tr|B2RXW8|B2RXW8_MOUSE Ppfia1 protein OS=Mus musculus GN=Ppfia1 PE=2 SV=1	5	13	13	8	6	5	10	1	1	3	8	10	8	4	2	4	6	5	10	1	1	3	8	10	8	4	2	4	2	2	6	0	0	1	4	6	5	2	0	1	14	14	10.2	142.8	1267
B9EHD0;Q8K1T1	B9EHD0;Q8K1T1	Leucine-rich repeat-containing protein 25	Lrrc25	>tr|B9EHD0|B9EHD0_MOUSE Leucine rich repeat containing 25 OS=Mus musculus GN=Lrrc25 PE=2 SV=1;>sp|Q8K1T1|LRC25_MOUSE Leucine-rich repeat-containing protein 25 OS=Mus musculus GN=Lrrc25 PE=1 SV=1	2	4	4	4	2	2	2	3	3	2	1	1	1	1	2	1	2	2	2	3	3	2	1	1	1	1	2	1	2	2	2	3	3	2	1	1	1	1	2	1	19.5	19.5	19.5	32.673	297
B9EHF7;Q08369;E9Q087;E9PXW9;Q3UYJ1	B9EHF7;Q08369;E9Q087;E9PXW9;Q3UYJ1	Transcription factor GATA-4	Gata4	>tr|B9EHF7|B9EHF7_MOUSE GATA binding protein 4 OS=Mus musculus GN=Gata4 PE=2 SV=1;>sp|Q08369|GATA4_MOUSE Transcription factor GATA-4 OS=Mus musculus GN=Gata4 PE=1 SV=3;>tr|E9Q087|E9Q087_MOUSE Transcription factor GATA-4 OS=Mus musculus GN=Gata4 PE=4 SV=1;>	5	8	8	6	7	6	8	1	1	1	6	5	8	1	2	4	7	6	8	1	1	1	6	5	8	1	2	4	5	4	6	1	1	1	5	4	6	0	1	3	29	29	21.8	44.58	441
B9EHG7;Q9JHE3;REV__F8WJ19;REV__Q80SU7	B9EHG7;Q9JHE3	Neutral ceramidase;Neutral ceramidase soluble form	Asah2	>tr|B9EHG7|B9EHG7_MOUSE N-acylsphingosine amidohydrolase 2 OS=Mus musculus GN=Asah2 PE=2 SV=1;>sp|Q9JHE3|ASAH2_MOUSE Neutral ceramidase OS=Mus musculus GN=Asah2 PE=1 SV=1	4	19	19	19	12	13	16	14	10	15	14	14	14	14	17	14	12	13	16	14	10	15	14	14	14	14	17	14	12	13	16	14	10	15	14	14	14	14	17	14	31.5	31.5	31.5	83.508	756
B9EHN0;Q02053;P31254	B9EHN0;Q02053	Ubiquitin-like modifier-activating enzyme 1	Uba1	>tr|B9EHN0|B9EHN0_MOUSE Ubiquitin-activating enzyme E1, Chr X OS=Mus musculus GN=Uba1 PE=2 SV=1;>sp|Q02053|UBA1_MOUSE Ubiquitin-like modifier-activating enzyme 1 OS=Mus musculus GN=Uba1 PE=1 SV=1	3	40	40	40	28	27	35	17	15	17	30	31	31	19	20	23	28	27	35	17	15	17	30	31	31	19	20	23	28	27	35	17	15	17	30	31	31	19	20	23	48.9	48.9	48.9	117.81	1058
B9EHY2;Q80W54	B9EHY2;Q80W54	CAAX prenyl protease 1 homolog	Zmpste24	>tr|B9EHY2|B9EHY2_MOUSE Zinc metallopeptidase, STE24 homolog (S. cerevisiae) OS=Mus musculus GN=Zmpste24 PE=2 SV=1;>sp|Q80W54|FACE1_MOUSE CAAX prenyl protease 1 homolog OS=Mus musculus GN=Zmpste24 PE=1 SV=2	2	19	19	19	10	12	9	13	13	13	15	13	13	15	15	13	10	12	9	13	13	13	15	13	13	15	15	13	10	12	9	13	13	13	15	13	13	15	15	13	37.9	37.9	37.9	54.734	475
B9EHZ5;Q9JLB0-2;Q3UN60;Q9JLB0;Q9WV34-2;B1AQF9;Q9WV34;E9PWC5	B9EHZ5;Q9JLB0-2;Q3UN60;Q9JLB0	MAGUK p55 subfamily member 6	Mpp6	>tr|B9EHZ5|B9EHZ5_MOUSE Membrane protein, palmitoylated 6 (MAGUK p55 subfamily member 6) OS=Mus musculus GN=Mpp6 PE=2 SV=1;>sp|Q9JLB0-2|MPP6_MOUSE Isoform Alpha of MAGUK p55 subfamily member 6 OS=Mus musculus GN=Mpp6;>tr|Q3UN60|Q3UN60_MOUSE Membrane protei	8	6	6	6	3	3	4	1	1	3	1	4	3	1	2	2	3	3	4	1	1	3	1	4	3	1	2	2	3	3	4	1	1	3	1	4	3	1	2	2	15.2	15.2	15.2	60.924	539
B9EI57;Q8CH25;Q9CS69	B9EI57;Q8CH25	SAFB-like transcription modulator	Sltm	>tr|B9EI57|B9EI57_MOUSE SAFB-like, transcription modulator OS=Mus musculus GN=Sltm PE=2 SV=1;>sp|Q8CH25|SLTM_MOUSE SAFB-like transcription modulator OS=Mus musculus GN=Sltm PE=1 SV=1	3	23	1	1	12	17	17	3	4	3	14	13	16	1	3	1	0	1	0	0	0	0	1	1	1	0	0	0	0	1	0	0	0	0	1	1	1	0	0	0	28.6	2.5	2.5	116.92	1031
B9EI85;P84228	B9EI85;P84228	Histone H3;Histone H3.2	Hist2h3b;Hist1h3b	>tr|B9EI85|B9EI85_MOUSE Histone H3 OS=Mus musculus GN=Hist2h3b PE=2 SV=1;>sp|P84228|H32_MOUSE Histone H3.2 OS=Mus musculus GN=Hist1h3b PE=1 SV=2	2	17	17	2	14	13	14	10	8	11	16	13	13	12	12	12	14	13	14	10	8	11	16	13	13	12	12	12	0	0	0	0	0	0	1	0	0	1	2	1	69.1	69.1	26.5	15.388	136
B9EID1;Q8BGB8;D6RJJ8	B9EID1;Q8BGB8;D6RJJ8	Ubiquinone biosynthesis protein COQ4 homolog, mitochondrial	Coq4	>tr|B9EID1|B9EID1_MOUSE Coenzyme Q4 homolog (Yeast) OS=Mus musculus GN=Coq4 PE=2 SV=1;>sp|Q8BGB8|COQ4_MOUSE Ubiquinone biosynthesis protein COQ4 homolog, mitochondrial OS=Mus musculus GN=Coq4 PE=2 SV=1;>tr|D6RJJ8|D6RJJ8_MOUSE Ubiquinone biosynthesis protei	3	10	10	4	6	6	6	4	5	4	7	6	7	6	7	7	6	6	6	4	5	4	7	6	7	6	7	7	2	3	3	2	2	2	3	2	3	3	4	4	41.4	41.4	19.5	30.084	266
B9EIE9;P46664	B9EIE9;P46664	Adenylosuccinate synthetase;Adenylosuccinate synthetase isozyme 2	Adss	>tr|B9EIE9|B9EIE9_MOUSE Adenylosuccinate synthetase OS=Mus musculus GN=Adss PE=2 SV=1;>sp|P46664|PURA2_MOUSE Adenylosuccinate synthetase isozyme 2 OS=Mus musculus GN=Adss PE=1 SV=2	2	15	15	15	7	5	11	2	3	3	12	13	14	4	7	5	7	5	11	2	3	3	12	13	14	4	7	5	7	5	11	2	3	3	12	13	14	4	7	5	46.7	46.7	46.7	50.02	456
B9EIG6;Q8BZH4;Q0VGT3;D3YUX1;D3YUW8	B9EIG6;Q8BZH4;Q0VGT3;D3YUX1;D3YUW8	Pogo transposable element with ZNF domain	Pogz	>tr|B9EIG6|B9EIG6_MOUSE Pogo transposable element with ZNF domain OS=Mus musculus GN=Pogz PE=2 SV=1;>sp|Q8BZH4|POGZ_MOUSE Pogo transposable element with ZNF domain OS=Mus musculus GN=Pogz PE=1 SV=2;>tr|Q0VGT3|Q0VGT3_MOUSE Pogo transposable element with ZNF	5	5	5	5	2	3	3	1	1	1	5	3	2	2	2	2	2	3	3	1	1	1	5	3	2	2	2	2	2	3	3	1	1	1	5	3	2	2	2	2	4.9	4.9	4.9	154.91	1409
B9EIV8;Q9WVL3;Q9WVL3-2;E9Q0L1	B9EIV8;Q9WVL3;Q9WVL3-2;E9Q0L1	Solute carrier family 12 member 7	Slc12a7	>tr|B9EIV8|B9EIV8_MOUSE Solute carrier family 12, member 7 OS=Mus musculus GN=Slc12a7 PE=2 SV=1;>sp|Q9WVL3|S12A7_MOUSE Solute carrier family 12 member 7 OS=Mus musculus GN=Slc12a7 PE=1 SV=1;>sp|Q9WVL3-2|S12A7_MOUSE Isoform 2 of Solute carrier family 12 mem	4	34	34	26	21	19	23	27	23	27	23	22	24	27	29	29	21	19	23	27	23	27	23	22	24	27	29	29	16	15	18	19	16	19	19	18	20	20	22	22	41.6	41.6	33.7	119.48	1083
B9EJ16;Q8VIM5-3;Q8VIM5;Q8VIM5-4;F6Z5R9;Q8VIM5-5;Q5SS66;Q8VIM5-2	B9EJ16;Q8VIM5-3;Q8VIM5;Q8VIM5-4;F6Z5R9;Q8VIM5-5;Q5SS66;Q8VIM5-2	Myocardin	Myocd	>tr|B9EJ16|B9EJ16_MOUSE Myocardin OS=Mus musculus GN=Myocd PE=2 SV=1;>sp|Q8VIM5-3|MYCD_MOUSE Isoform 3 of Myocardin OS=Mus musculus GN=Myocd;>sp|Q8VIM5|MYCD_MOUSE Myocardin OS=Mus musculus GN=Myocd PE=1 SV=2;>sp|Q8VIM5-4|MYCD_MOUSE Isoform 4 of Myocardin O	8	2	2	2	2	1	1	0	0	0	1	0	1	0	1	0	2	1	1	0	0	0	1	0	1	0	1	0	2	1	1	0	0	0	1	0	1	0	1	0	2.8	2.8	2.8	102.17	948
B9EJ23;O70589-2;E9QM23;F6ZQR2;F7CD87;B1AUH6	B9EJ23;O70589-2;E9QM23		Cask	>tr|B9EJ23|B9EJ23_MOUSE Cask protein OS=Mus musculus GN=Cask PE=2 SV=1;>sp|O70589-2|CSKP_MOUSE Isoform 2 of Peripheral plasma membrane protein CASK OS=Mus musculus GN=Cask;>tr|E9QM23|E9QM23_MOUSE Peripheral plasma membrane protein CASK OS=Mus musculus GN=C	6	33	1	1	20	21	24	25	20	24	21	19	18	28	28	30	0	0	1	0	0	0	0	0	0	0	0	0	0	0	1	0	0	0	0	0	0	0	0	0	46.5	1.5	1.5	100.19	880
B9EJ80	B9EJ80		Pdzd8	>tr|B9EJ80|B9EJ80_MOUSE PDZ domain containing 8 OS=Mus musculus GN=Pdzd8 PE=2 SV=1	1	16	16	16	5	4	6	5	4	4	8	7	11	6	4	5	5	4	6	5	4	4	8	7	11	6	4	5	5	4	6	5	4	4	8	7	11	6	4	5	17.7	17.7	17.7	127.74	1147
B9EJ86;G3X9N6	B9EJ86;G3X9N6	Oxysterol-binding protein	Osbpl8	>tr|B9EJ86|B9EJ86_MOUSE Oxysterol-binding protein OS=Mus musculus GN=Osbpl8 PE=2 SV=1;>tr|G3X9N6|G3X9N6_MOUSE Oxysterol-binding protein OS=Mus musculus GN=Osbpl8 PE=3 SV=1	2	2	2	2	0	0	0	0	0	0	1	2	1	0	0	0	0	0	0	0	0	0	1	2	1	0	0	0	0	0	0	0	0	0	1	2	1	0	0	0	3.1	3.1	3.1	101.27	889
B9EJR4;O35387;G3X9M8	B9EJR4;O35387;G3X9M8	HCLS1-associated protein X-1	Hax1	>tr|B9EJR4|B9EJR4_MOUSE HCLS1 associated X-1 OS=Mus musculus GN=Hax1 PE=2 SV=1;>sp|O35387|HAX1_MOUSE HCLS1-associated protein X-1 OS=Mus musculus GN=Hax1 PE=1 SV=1;>tr|G3X9M8|G3X9M8_MOUSE HCLS1-associated protein X-1 OS=Mus musculus GN=Hax1 PE=4 SV=1	3	6	6	6	4	3	3	4	1	1	5	5	5	5	6	5	4	3	3	4	1	1	5	5	5	5	6	5	4	3	3	4	1	1	5	5	5	5	6	5	24.6	24.6	24.6	31.654	280
B9EJR8	B9EJR8		Heatr2	>tr|B9EJR8|B9EJR8_MOUSE HEAT repeat containing 2 OS=Mus musculus GN=Heatr2 PE=2 SV=1	1	5	5	5	2	4	2	0	2	2	2	2	1	1	2	0	2	4	2	0	2	2	2	2	1	1	2	0	2	4	2	0	2	2	2	2	1	1	2	0	6.4	6.4	6.4	93.85	853
B9EJX8;Q9D0W5	B9EJX8;Q9D0W5	Peptidyl-prolyl cis-trans isomerase;Peptidyl-prolyl cis-trans isomerase-like 1	Ppil1	>tr|B9EJX8|B9EJX8_MOUSE Peptidyl-prolyl cis-trans isomerase OS=Mus musculus GN=Ppil1 PE=2 SV=1;>sp|Q9D0W5|PPIL1_MOUSE Peptidyl-prolyl cis-trans isomerase-like 1 OS=Mus musculus GN=Ppil1 PE=2 SV=1	2	4	4	4	3	4	4	0	1	1	4	3	4	1	1	2	3	4	4	0	1	1	4	3	4	1	1	2	3	4	4	0	1	1	4	3	4	1	1	2	31.9	31.9	31.9	18.237	166
B9EKI3	B9EKI3	TATA element modulatory factor	Tmf1	>sp|B9EKI3|TMF1_MOUSE TATA element modulatory factor OS=Mus musculus GN=Tmf1 PE=1 SV=2	1	11	11	5	6	5	7	1	2	2	7	5	6	1	1	4	6	5	7	1	2	2	7	5	6	1	1	4	4	3	3	0	0	1	3	3	3	0	0	2	11.1	11.1	5.2	121.8	1091
B9EKJ3	B9EKJ3		Mon2	>tr|B9EKJ3|B9EKJ3_MOUSE Mon2 protein OS=Mus musculus GN=Mon2 PE=2 SV=1	1	44	2	2	27	29	31	24	20	22	35	33	33	29	25	24	1	2	1	0	0	0	2	2	2	0	0	0	1	2	1	0	0	0	2	2	2	0	0	0	32.2	1.1	1.1	188.35	1709
B9EKL6;Q63739	B9EKL6;Q63739	Protein tyrosine phosphatase type IVA 1	Ptp4a1	>tr|B9EKL6|B9EKL6_MOUSE MCG114106 OS=Mus musculus GN=Ptp4a1 PE=2 SV=1;>sp|Q63739|TP4A1_MOUSE Protein tyrosine phosphatase type IVA 1 OS=Mus musculus GN=Ptp4a1 PE=1 SV=1	2	10	10	5	6	7	7	9	7	8	6	6	6	7	9	8	6	7	7	9	7	8	6	6	6	7	9	8	2	3	2	4	2	3	2	2	3	3	5	4	58.4	58.4	43.4	19.815	173
B9EKS2;Q6ZPY7	B9EKS2;Q6ZPY7	Lysine-specific demethylase 3B	Kdm3b	>tr|B9EKS2|B9EKS2_MOUSE Jumonji domain containing 1B OS=Mus musculus GN=Kdm3b PE=2 SV=1;>sp|Q6ZPY7|KDM3B_MOUSE Lysine-specific demethylase 3B OS=Mus musculus GN=Kdm3b PE=1 SV=2	2	1	1	1	1	1	1	0	0	0	1	1	1	0	0	0	1	1	1	0	0	0	1	1	1	0	0	0	1	1	1	0	0	0	1	1	1	0	0	0	0.7	0.7	0.7	191.46	1762
B9EKS7;Q8BHF7;F8WI04;F2Z427	B9EKS7;Q8BHF7;F8WI04;F2Z427	CDP-diacylglycerol--glycerol-3-phosphate 3-phosphatidyltransferase, mitochondrial	Pgs1	>tr|B9EKS7|B9EKS7_MOUSE MCG19305, isoform CRA_b OS=Mus musculus GN=Pgs1 PE=2 SV=1;>sp|Q8BHF7|PGPS1_MOUSE CDP-diacylglycerol--glycerol-3-phosphate 3-phosphatidyltransferase, mitochondrial OS=Mus musculus GN=Pgs1 PE=2 SV=1;>tr|F8WI04|F8WI04_MOUSE CDP-diacylg	4	12	12	12	7	7	9	9	7	7	9	9	8	10	9	9	7	7	9	9	7	7	9	9	8	10	9	9	7	7	9	9	7	7	9	9	8	10	9	9	28	28	28	62.488	553
C4B4E7;Q9D517;D3Z1M6;D3YUW0	C4B4E7;Q9D517	1-acyl-sn-glycerol-3-phosphate acyltransferase gamma	Agpat3	>tr|C4B4E7|C4B4E7_MOUSE 1-acylglycerol-3-phosphate O-acyltransferase 3, isoform CRA_a OS=Mus musculus GN=Agpat3 PE=2 SV=1;>sp|Q9D517|PLCC_MOUSE 1-acyl-sn-glycerol-3-phosphate acyltransferase gamma OS=Mus musculus GN=Agpat3 PE=1 SV=2	4	15	15	15	10	12	11	14	11	11	10	11	11	13	14	13	10	12	11	14	11	11	10	11	11	13	14	13	10	12	11	14	11	11	10	11	11	13	14	13	33.8	33.8	33.8	43.295	376
C7G3P2;Q61136	C7G3P2;Q61136	Serine/threonine-protein kinase PRP4 homolog	Prpf4b	>tr|C7G3P2|C7G3P2_MOUSE MKIAA0536 protein (Fragment) OS=Mus musculus GN=Prpf4b PE=2 SV=1;>sp|Q61136|PRP4B_MOUSE Serine/threonine-protein kinase PRP4 homolog OS=Mus musculus GN=Prpf4b PE=1 SV=3	2	8	8	8	4	6	6	0	0	0	6	6	5	2	1	0	4	6	6	0	0	0	6	6	5	2	1	0	4	6	6	0	0	0	6	6	5	2	1	0	11.3	11.3	11.3	117.43	1011
D0EW11;Q8K5B2;D3Z1G3;D3Z6A4	D0EW11;Q8K5B2;D3Z1G3;D3Z6A4	Multiple coagulation factor deficiency protein 2 homolog	Mcfd2	>tr|D0EW11|D0EW11_MOUSE Multiple coagulation factor deficiency 2 isoform 1 OS=Mus musculus GN=Mcfd2 PE=2 SV=1;>sp|Q8K5B2|MCFD2_MOUSE Multiple coagulation factor deficiency protein 2 homolog OS=Mus musculus GN=Mcfd2 PE=2 SV=1;>tr|D3Z1G3|D3Z1G3_MOUSE Multipl	4	4	4	4	1	3	3	2	2	2	3	3	3	3	4	3	1	3	3	2	2	2	3	3	3	3	4	3	1	3	3	2	2	2	3	3	3	3	4	3	69	69	69	16.168	145
D0QMC3;E9QLE0;P15092;P15092-2;E9QKL6	D0QMC3	Myeloid cell nuclear differentiation antigen-like protein	Mndal	>sp|D0QMC3|MNDAL_MOUSE Myeloid cell nuclear differentiation antigen-like protein OS=Mus musculus GN=Mndal PE=2 SV=1	5	4	4	3	1	3	0	0	0	0	3	3	3	0	0	0	1	3	0	0	0	0	3	3	3	0	0	0	1	3	0	0	0	0	2	2	2	0	0	0	11.5	11.5	9.9	60.526	538
D2CGM4;Q8R5F7;Q8R5F7-2	D2CGM4;Q8R5F7;Q8R5F7-2	Interferon-induced helicase C domain-containing protein 1	Ifih1	>tr|D2CGM4|D2CGM4_MOUSE Melanoma differentiation-associated protein 5 OS=Mus musculus GN=Ifih1 PE=2 SV=1;>sp|Q8R5F7|IFIH1_MOUSE Interferon-induced helicase C domain-containing protein 1 OS=Mus musculus GN=Ifih1 PE=1 SV=1;>sp|Q8R5F7-2|IFIH1_MOUSE Isoform 2	3	34	34	34	22	20	26	11	8	12	25	30	22	12	11	10	22	20	26	11	8	12	25	30	22	12	11	10	22	20	26	11	8	12	25	30	22	12	11	10	43.6	43.6	43.6	115.97	1025
D2KHZ9;P16858;E9PX42;E9QAC7;E9Q1S8;E9Q5U3;E9Q0E3;E9PX72;E9Q9E5;D3YUV0;F8WJL5;E9PXL6;E9PZL2;F6ZQM8;E9PYX4;CON__P10096;E9PZH9;D3YYI5;D3YV03;D3Z1B7;D3Z0Z9;F6QXU4;F6UT49;E9PZP4;E9QP42;Q64467;E9PX99	D2KHZ9;P16858;E9PX42;E9QAC7;E9Q1S8;E9Q5U3;E9Q0E3;E9PX72;E9Q9E5;D3YUV0;F8WJL5;E9PXL6;E9PZL2;F6ZQM8;E9PYX4;CON__P10096;E9PZH9;D3YYI5;D3YV03	Glyceraldehyde-3-phosphate dehydrogenase	Gapdh;Gm2606;Gm3839;Gm4609;Gm10358;Gm10293;Gm5559;Gm10481;Gm10291;Gm3200;Gm10327;Gm3222;Gm5507;Gm10566;Gm7293;Gm10290	>tr|D2KHZ9|D2KHZ9_MOUSE Glyceraldehyde-3-phosphate dehydrogenase OS=Mus musculus GN=Gapdh PE=2 SV=1;>sp|P16858|G3P_MOUSE Glyceraldehyde-3-phosphate dehydrogenase OS=Mus musculus GN=Gapdh PE=1 SV=2;>tr|E9PX42|E9PX42_MOUSE Glyceraldehyde-3-phosphate dehydrog	27	18	18	6	13	15	15	14	15	15	14	16	15	16	17	17	13	15	15	14	15	15	14	16	15	16	17	17	3	5	5	4	4	4	5	5	5	5	6	6	73.3	73.3	41.7	35.81	333
D3YTN4;Q99JY3;D3YWB5;D6RGS2	D3YTN4;Q99JY3	GTPase IMAP family member 4	Gimap4	>tr|D3YTN4|D3YTN4_MOUSE GTPase IMAP family member 4 OS=Mus musculus GN=Gimap4 PE=4 SV=1;>sp|Q99JY3|GIMA4_MOUSE GTPase IMAP family member 4 OS=Mus musculus GN=Gimap4 PE=1 SV=1	4	12	12	12	7	8	10	4	3	4	10	10	10	2	3	2	7	8	10	4	3	4	10	10	10	2	3	2	7	8	10	4	3	4	10	10	10	2	3	2	41.5	41.5	41.5	38.044	328
D3YTP3	D3YTP3		Mtx3	>tr|D3YTP3|D3YTP3_MOUSE Protein Mtx3 OS=Mus musculus GN=Mtx3 PE=4 SV=2	1	4	4	4	2	1	2	1	1	2	4	3	4	2	2	2	2	1	2	1	1	2	4	3	4	2	2	2	2	1	2	1	1	2	4	3	4	2	2	2	16	16	16	34.89	312
D3YTQ3;F6VQH5;Q9Z130	D3YTQ3;F6VQH5;Q9Z130	Heterogeneous nuclear ribonucleoprotein D-like	Hnrpdl	>tr|D3YTQ3|D3YTQ3_MOUSE Heterogeneous nuclear ribonucleoprotein D-like OS=Mus musculus GN=Hnrpdl PE=4 SV=1;>tr|F6VQH5|F6VQH5_MOUSE Heterogeneous nuclear ribonucleoprotein D-like (Fragment) OS=Mus musculus GN=Hnrpdl PE=4 SV=1;>sp|Q9Z130|HNRDL_MOUSE Heteroge	3	12	10	10	10	11	11	4	2	6	9	10	11	5	6	7	8	9	9	3	1	5	7	8	9	4	4	5	8	9	9	3	1	5	7	8	9	4	4	5	31	31	31	46.27	420
D3YTS1;D3Z569;Q9R0P6;D3YWT0	D3YTS1;D3Z569;Q9R0P6;D3YWT0	Signal peptidase complex catalytic subunit SEC11A	Sec11a	>tr|D3YTS1|D3YTS1_MOUSE Sec11-like 1 (S. cerevisiae), isoform CRA_d OS=Mus musculus GN=Sec11a PE=4 SV=1;>tr|D3Z569|D3Z569_MOUSE Sec11-like 1 (S. cerevisiae), isoform CRA_e OS=Mus musculus GN=Sec11a PE=4 SV=1;>sp|Q9R0P6|SC11A_MOUSE Signal peptidase complex	4	8	8	8	7	6	8	7	7	5	7	8	8	7	6	7	7	6	8	7	7	5	7	8	8	7	6	7	7	6	8	7	7	5	7	8	8	7	6	7	21.1	21.1	21.1	27.931	247
D3YTT6;Q9DBS9;D3Z194;F8WH20;F7C630;D3YVF7	D3YTT6;Q9DBS9;D3Z194;F8WH20;F7C630	Oxysterol-binding protein;Oxysterol-binding protein-related protein 3	Osbpl3	>tr|D3YTT6|D3YTT6_MOUSE Oxysterol-binding protein OS=Mus musculus GN=Osbpl3 PE=3 SV=1;>sp|Q9DBS9|OSBL3_MOUSE Oxysterol-binding protein-related protein 3 OS=Mus musculus GN=Osbpl3 PE=1 SV=2;>tr|D3Z194|D3Z194_MOUSE Oxysterol-binding protein OS=Mus musculus G	6	19	19	19	12	11	8	7	8	5	13	15	14	6	5	5	12	11	8	7	8	5	13	15	14	6	5	5	12	11	8	7	8	5	13	15	14	6	5	5	30.2	30.2	30.2	100.5	886
D3YU05	D3YU05	Glyceraldehyde-3-phosphate dehydrogenase	Gm6316	>tr|D3YU05|D3YU05_MOUSE Glyceraldehyde-3-phosphate dehydrogenase OS=Mus musculus GN=Gm6316 PE=3 SV=1	1	13	1	1	10	11	11	11	11	12	9	11	10	11	12	11	0	1	1	1	0	1	0	0	0	0	1	0	0	1	1	1	0	1	0	0	0	0	1	0	38.6	2.9	2.9	36.541	339
D3YU39;Q8C025-2;D3Z6W4;Q8C025-3;D6RCW3;F7DAN4;F6X1K1	D3YU39		Chpt1	>tr|D3YU39|D3YU39_MOUSE Cholinephosphotransferase 1 OS=Mus musculus GN=Chpt1 PE=3 SV=1	7	5	1	1	5	5	4	3	4	3	5	4	4	3	5	4	1	1	1	1	1	1	1	0	1	1	1	1	1	1	1	1	1	1	1	0	1	1	1	1	14.3	3.9	3.9	45.434	406
D3YU50;Q6P6L5;F6RQD1	D3YU50;Q6P6L5;F6RQD1		Mybpc1	>tr|D3YU50|D3YU50_MOUSE Protein Mybpc1 OS=Mus musculus GN=Mybpc1 PE=4 SV=1;>tr|Q6P6L5|Q6P6L5_MOUSE Protein Mybpc1 OS=Mus musculus GN=Mybpc1 PE=2 SV=1;>tr|F6RQD1|F6RQD1_MOUSE Protein Mybpc1 (Fragment) OS=Mus musculus GN=Mybpc1 PE=4 SV=1	3	2	2	2	2	2	2	0	0	1	2	2	2	1	0	1	2	2	2	0	0	1	2	2	2	1	0	1	2	2	2	0	0	1	2	2	2	1	0	1	2.6	2.6	2.6	126.56	1127
D3YU95;P63034;P63034-2;Q99KH2;P63034-3;D3YU96;D6RCZ5;O08967;Q3TXK1;D3Z5C3	D3YU95;P63034;P63034-2;Q99KH2;P63034-3;D3YU96;D6RCZ5	Cytohesin-2	Cyth2	>tr|D3YU95|D3YU95_MOUSE Cytohesin-2 OS=Mus musculus GN=Cyth2 PE=4 SV=1;>sp|P63034|CYH2_MOUSE Cytohesin-2 OS=Mus musculus GN=Cyth2 PE=1 SV=2;>sp|P63034-2|CYH2_MOUSE Isoform 2 of Cytohesin-2 OS=Mus musculus GN=Cyth2;>tr|Q99KH2|Q99KH2_MOUSE Cytohesin 2 OS=Mus	10	7	7	2	5	5	4	3	2	2	5	5	4	4	3	3	5	5	4	3	2	2	5	5	4	4	3	3	1	1	1	1	1	1	1	1	1	2	2	2	19.5	19.5	6.3	47.504	410
D3YUC5;Q80TD3	D3YUC5;Q80TD3	Folliculin-interacting protein 2	Fnip2	>tr|D3YUC5|D3YUC5_MOUSE Folliculin-interacting protein 2 OS=Mus musculus GN=Fnip2 PE=4 SV=1;>sp|Q80TD3|FNIP2_MOUSE Folliculin-interacting protein 2 OS=Mus musculus GN=Fnip2 PE=2 SV=2	2	1	1	1	1	1	1	0	1	1	0	1	0	0	0	0	1	1	1	0	1	1	0	1	0	0	0	0	1	1	1	0	1	1	0	1	0	0	0	0	0.7	0.7	0.7	125.61	1138
D3YUC9	D3YUC9		Msrb3	>tr|D3YUC9|D3YUC9_MOUSE Methionine-R-sulfoxide reductase B3, mitochondrial OS=Mus musculus GN=Msrb3 PE=4 SV=1	1	1	1	1	1	1	1	0	1	0	1	1	1	0	0	0	1	1	1	0	1	0	1	1	1	0	0	0	1	1	1	0	1	0	1	1	1	0	0	0	9.6	9.6	9.6	12.058	114
D3YUJ3;E9Q226	D3YUJ3;E9Q226		Ccnyl1	>tr|D3YUJ3|D3YUJ3_MOUSE Protein Ccnyl1 OS=Mus musculus GN=Ccnyl1 PE=3 SV=1;>tr|E9Q226|E9Q226_MOUSE Protein Ccnyl1 OS=Mus musculus GN=Ccnyl1 PE=3 SV=1	2	2	1	1	0	0	0	1	1	1	0	1	1	0	1	1	0	0	0	1	1	1	0	1	1	0	0	0	0	0	0	1	1	1	0	1	1	0	0	0	6.3	3.3	3.3	41.6	367
D3YUP0;Q0P5W1;F8WI64;Q0P5W1-3;Q0P5W1-2;F6ZLN8;Q8CIG5;D3Z5P1	D3YUP0;Q0P5W1;F8WI64;Q0P5W1-3;Q0P5W1-2;F6ZLN8;Q8CIG5;D3Z5P1	Vacuolar protein sorting-associated protein 8 homolog	Vps8	>tr|D3YUP0|D3YUP0_MOUSE Vacuolar protein sorting-associated protein 8 homolog OS=Mus musculus GN=Vps8 PE=4 SV=1;>sp|Q0P5W1|VPS8_MOUSE Vacuolar protein sorting-associated protein 8 homolog OS=Mus musculus GN=Vps8 PE=2 SV=1;>tr|F8WI64|F8WI64_MOUSE Vacuolar p	8	4	4	4	2	3	2	2	3	1	3	2	3	1	1	1	2	3	2	2	3	1	3	2	3	1	1	1	2	3	2	2	3	1	3	2	3	1	1	1	3.4	3.4	3.4	161.33	1429
D3YUP1;Q9WVG6;Q9WVG6-2;D6RFA7	D3YUP1;Q9WVG6;Q9WVG6-2	Histone-arginine methyltransferase CARM1	Carm1	>tr|D3YUP1|D3YUP1_MOUSE Histone-arginine methyltransferase CARM1 OS=Mus musculus GN=Carm1 PE=4 SV=1;>sp|Q9WVG6|CARM1_MOUSE Histone-arginine methyltransferase CARM1 OS=Mus musculus GN=Carm1 PE=1 SV=2;>sp|Q9WVG6-2|CARM1_MOUSE Isoform 2 of Histone-arginine me	4	7	7	7	3	4	6	5	3	2	4	4	4	3	5	4	3	4	6	5	3	2	4	4	4	3	5	4	3	4	6	5	3	2	4	4	4	3	5	4	12	12	12	70.322	651
D3YUP5;E9Q180	D3YUP5		Exoc3l2	>tr|D3YUP5|D3YUP5_MOUSE Protein Exoc3l2 OS=Mus musculus GN=Exoc3l2 PE=4 SV=1	2	4	4	4	3	3	3	2	2	2	3	3	3	4	4	4	3	3	3	2	2	2	3	3	3	4	4	4	3	3	3	2	2	2	3	3	3	4	4	4	19.2	19.2	19.2	25.39	224
D3YUT9;P07091;Q545V2	D3YUT9;P07091;Q545V2	Protein S100-A4	S100a4	>tr|D3YUT9|D3YUT9_MOUSE Protein S100-A4 OS=Mus musculus GN=S100a4 PE=4 SV=1;>sp|P07091|S10A4_MOUSE Protein S100-A4 OS=Mus musculus GN=S100a4 PE=1 SV=1;>tr|Q545V2|Q545V2_MOUSE S100 calcium binding protein A4 OS=Mus musculus GN=S100a4 PE=2 SV=1	3	1	1	1	0	1	1	0	0	0	1	1	1	0	0	0	0	1	1	0	0	0	1	1	1	0	0	0	0	1	1	0	0	0	1	1	1	0	0	0	16.8	16.8	16.8	11.722	101
D3YUW7;P59242-2;Q3TKR3	D3YUW7;P59242-2		Cgn	>tr|D3YUW7|D3YUW7_MOUSE Cingulin OS=Mus musculus GN=Cgn PE=4 SV=1;>sp|P59242-2|CING_MOUSE Isoform 2 of Cingulin OS=Mus musculus GN=Cgn	3	48	1	1	31	38	38	10	13	13	37	38	42	14	17	13	0	0	0	0	0	0	1	1	1	0	0	0	0	0	0	0	0	0	1	1	1	0	0	0	46.7	1.9	1.9	135.74	1184
D3YVR3	D3YVR3		Mgst1	>tr|D3YVR3|D3YVR3_MOUSE Microsomal glutathione S-transferase 1 (Fragment) OS=Mus musculus GN=Mgst1 PE=4 SV=1	1	3	1	1	2	2	3	2	2	2	1	2	2	2	3	2	0	1	1	0	0	0	0	0	0	0	1	0	0	1	1	0	0	0	0	0	0	0	1	0	37	19.6	19.6	10.116	92
D3YVW2;Q8BXA1;F6RUD1	D3YVW2;Q8BXA1	Golgi integral membrane protein 4	Golim4	>tr|D3YVW2|D3YVW2_MOUSE Golgi integral membrane protein 4 OS=Mus musculus GN=Golim4 PE=4 SV=1;>sp|Q8BXA1|GOLI4_MOUSE Golgi integral membrane protein 4 OS=Mus musculus GN=Golim4 PE=1 SV=1	3	22	22	22	15	19	18	14	10	14	17	14	18	15	16	13	15	19	18	14	10	14	17	14	18	15	16	13	15	19	18	14	10	14	17	14	18	15	16	13	46.9	46.9	46.9	79.904	683
D3YW42;G3X927;Q8VC31;G3UXR7;A3KGF9;D3Z1Q6	D3YW42;G3X927;Q8VC31	Coiled-coil domain-containing protein 9	Ccdc9	>tr|D3YW42|D3YW42_MOUSE Coiled-coil domain-containing protein 9 OS=Mus musculus GN=Ccdc9 PE=4 SV=2;>tr|G3X927|G3X927_MOUSE Coiled-coil domain-containing protein 9 OS=Mus musculus GN=Ccdc9 PE=4 SV=1;>sp|Q8VC31|CCDC9_MOUSE Coiled-coil domain-containing prote	6	6	6	6	4	4	6	0	0	2	5	3	5	1	0	0	4	4	6	0	0	2	5	3	5	1	0	0	4	4	6	0	0	2	5	3	5	1	0	0	12.6	12.6	12.6	65.937	589
D3YW52;Q61838;D3YUI3	D3YW52;Q61838	Alpha-2-macroglobulin;Alpha-2-macroglobulin 165 kDa subunit;Alpha-2-macroglobulin 35 kDa subunit	Pzp;A2m	>tr|D3YW52|D3YW52_MOUSE Protein Pzp OS=Mus musculus GN=Pzp PE=4 SV=1;>sp|Q61838|A2M_MOUSE Alpha-2-macroglobulin OS=Mus musculus GN=A2m PE=1 SV=3	3	39	39	39	17	20	23	23	20	19	23	22	19	31	31	33	17	20	23	23	20	19	23	22	19	31	31	33	17	20	23	23	20	19	23	22	19	31	31	33	32.8	32.8	32.8	167.28	1507
D3YWA2;Q7TT16	D3YWA2;Q7TT16	Inositol polyphosphate multikinase	Ipmk	>tr|D3YWA2|D3YWA2_MOUSE Inositol polyphosphate multikinase OS=Mus musculus GN=Ipmk PE=4 SV=1;>sp|Q7TT16|IPMK_MOUSE Inositol polyphosphate multikinase OS=Mus musculus GN=Ipmk PE=2 SV=1	2	2	2	1	2	1	1	0	0	2	0	0	1	1	0	0	2	1	1	0	0	2	0	0	1	1	0	0	1	0	1	0	0	1	0	0	0	1	0	0	5.5	5.5	2.3	44.523	397
D3YWD3;B1AZA5;B1AZA8;E9Q1J4	D3YWD3;B1AZA5		D730040F13Rik	>tr|D3YWD3|D3YWD3_MOUSE Uncharacterized protein OS=Mus musculus GN=Tmem245 PE=4 SV=1;>sp|B1AZA5|TM245_MOUSE Transmembrane protein 245 OS=Mus musculus GN=Tmem245 PE=1 SV=1	4	7	7	7	6	4	6	2	3	1	3	6	7	2	4	4	6	4	6	2	3	1	3	6	7	2	4	4	6	4	6	2	3	1	3	6	7	2	4	4	8.8	8.8	8.8	97.73	880
D3YWJ4;Q8K2I1	D3YWJ4;Q8K2I1	Protein farnesyltransferase subunit beta	Fntb	>tr|D3YWJ4|D3YWJ4_MOUSE Protein farnesyltransferase subunit beta OS=Mus musculus GN=Fntb PE=4 SV=1;>sp|Q8K2I1|FNTB_MOUSE Protein farnesyltransferase subunit beta OS=Mus musculus GN=Fntb PE=1 SV=1	2	3	3	3	2	2	2	1	1	0	2	2	2	1	1	1	2	2	2	1	1	0	2	2	2	1	1	1	2	2	2	1	1	0	2	2	2	1	1	1	6.8	6.8	6.8	52.784	471
D3YWM8;O35464;O35464-2;O35464-3;D3YZJ8;F6WLW8	D3YWM8;O35464;O35464-2;O35464-3	Semaphorin-6A	Sema6a	>tr|D3YWM8|D3YWM8_MOUSE Semaphorin-6A OS=Mus musculus GN=Sema6a PE=4 SV=1;>sp|O35464|SEM6A_MOUSE Semaphorin-6A OS=Mus musculus GN=Sema6a PE=1 SV=2;>sp|O35464-2|SEM6A_MOUSE Isoform 2 of Semaphorin-6A OS=Mus musculus GN=Sema6a;>sp|O35464-3|SEM6A_MOUSE Isofor	6	6	6	6	0	1	2	4	3	2	0	1	0	1	1	2	0	1	2	4	3	2	0	1	0	1	1	2	0	1	2	4	3	2	0	1	0	1	1	2	8	8	8	116.46	1048
D3YWP4	D3YWP4		Gm10916	>tr|D3YWP4|D3YWP4_MOUSE Uncharacterized protein OS=Mus musculus GN=Gm10916 PE=4 SV=1	1	8	1	1	6	6	6	4	3	5	7	7	7	7	4	5	0	0	0	0	0	0	1	1	1	1	0	1	0	0	0	0	0	0	1	1	1	1	0	1	46.2	12.5	12.5	18.495	160
D3YWS8;Q8CBY3;D3YXV8	D3YWS8;Q8CBY3;D3YXV8	Leukocyte receptor cluster member 8 homolog	Leng8	>tr|D3YWS8|D3YWS8_MOUSE Leukocyte receptor cluster (LRC) member 8, isoform CRA_a OS=Mus musculus GN=Leng8 PE=4 SV=1;>sp|Q8CBY3|LENG8_MOUSE Leukocyte receptor cluster member 8 homolog OS=Mus musculus GN=Leng8 PE=1 SV=1;>tr|D3YXV8|D3YXV8_MOUSE Leukocyte rece	3	2	2	2	2	2	2	0	0	0	2	1	1	0	0	1	2	2	2	0	0	0	2	1	1	0	0	1	2	2	2	0	0	0	2	1	1	0	0	1	3.7	3.7	3.7	88.463	801
D3YWX2;F6YTL8;E9Q803;Q9R0I7;E9QAW2	D3YWX2;F6YTL8		Ylpm1	>tr|D3YWX2|D3YWX2_MOUSE YLP motif-containing protein 1 OS=Mus musculus GN=Ylpm1 PE=4 SV=2;>tr|F6YTL8|F6YTL8_MOUSE YLP motif-containing protein 1 (Fragment) OS=Mus musculus GN=Ylpm1 PE=4 SV=1	5	11	11	11	4	5	8	1	1	1	6	6	9	0	1	1	4	5	8	1	1	1	6	6	9	0	1	1	4	5	8	1	1	1	6	6	9	0	1	1	6.3	6.3	6.3	241.05	2139
D3YX02;D3Z0J0;D3Z1V7;E9QLQ1;E9QPP0;P28312	D3YX02;D3Z0J0;D3Z1V7;E9QLQ1;E9QPP0;P28312	Alpha-defensin 5	Gm15293;Gm15315;Defa5;Gm10104;Gm14850	>tr|D3YX02|D3YX02_MOUSE Protein Gm15293 OS=Mus musculus GN=Gm15293 PE=4 SV=1;>tr|D3Z0J0|D3Z0J0_MOUSE Protein Gm15315 OS=Mus musculus GN=Gm15315 PE=4 SV=1;>tr|D3Z1V7|D3Z1V7_MOUSE Alpha-defensin 5 OS=Mus musculus GN=Defa5 PE=4 SV=1;>tr|E9QLQ1|E9QLQ1_MOUSE Pr	6	2	2	2	2	2	2	0	0	0	2	2	2	2	1	2	2	2	2	0	0	0	2	2	2	2	1	2	2	2	2	0	0	0	2	2	2	2	1	2	12.9	12.9	12.9	10.378	93
D3YX03;Q9D848	D3YX03		Gm7849	>tr|D3YX03|D3YX03_MOUSE Protein Gm7861 OS=Mus musculus GN=Gm7861 PE=4 SV=1	2	4	4	3	2	2	2	2	1	3	2	1	2	1	2	2	2	2	2	2	1	3	2	1	2	1	2	2	1	1	1	1	0	2	1	0	1	0	1	1	53.4	53.4	43.1	12.799	116
D3YX43;E9PVW4;E9Q5Z8	D3YX43;E9PVW4;E9Q5Z8	V-set and immunoglobulin domain-containing protein 10	Vsig10	>sp|D3YX43|VSI10_MOUSE V-set and immunoglobulin domain-containing protein 10 OS=Mus musculus GN=Vsig10 PE=4 SV=2;>tr|E9PVW4|E9PVW4_MOUSE V-set and immunoglobulin domain-containing protein 10 OS=Mus musculus GN=Vsig10 PE=4 SV=1;>tr|E9Q5Z8|E9Q5Z8_MOUSE V-set	3	6	6	6	5	3	4	6	6	6	3	3	6	6	6	6	5	3	4	6	6	6	3	3	6	6	6	6	5	3	4	6	6	6	3	3	6	6	6	6	14.2	14.2	14.2	60.521	558
D3YXJ5	D3YXJ5		Fam84b	>tr|D3YXJ5|D3YXJ5_MOUSE Protein Fam84b OS=Mus musculus GN=Fam84b PE=4 SV=1	1	11	11	11	6	4	8	5	5	5	7	7	8	3	4	3	6	4	8	5	5	5	7	7	8	3	4	3	6	4	8	5	5	5	7	7	8	3	4	3	46.5	46.5	46.5	34.59	310
D3YXK1	D3YXK1	Atherin	Samd1	>sp|D3YXK1|SAMD1_MOUSE Atherin OS=Mus musculus GN=Samd1 PE=3 SV=1	1	4	4	4	0	1	2	1	0	0	0	1	1	0	0	0	0	1	2	1	0	0	0	1	1	0	0	0	0	1	2	1	0	0	0	1	1	0	0	0	14.5	14.5	14.5	54.532	519
D3YXK2;E9PZM6	D3YXK2	Scaffold attachment factor B1	Safb	>sp|D3YXK2|SAFB1_MOUSE Scaffold attachment factor B1 OS=Mus musculus GN=Safb PE=1 SV=2	2	31	31	22	23	21	25	9	6	6	23	25	27	5	10	8	23	21	25	9	6	6	23	25	27	5	10	8	15	15	17	7	4	6	16	18	19	4	7	6	42.6	42.6	32.7	105.1	937
D3YXN0;P61967;D3Z0D6;D3Z268	D3YXN0;P61967;D3Z0D6;D3Z268	AP-1 complex subunit sigma-1A	Ap1s1	>tr|D3YXN0|D3YXN0_MOUSE AP-1 complex subunit sigma-1A (Fragment) OS=Mus musculus GN=Ap1s1 PE=4 SV=1;>sp|P61967|AP1S1_MOUSE AP-1 complex subunit sigma-1A OS=Mus musculus GN=Ap1s1 PE=1 SV=1;>tr|D3Z0D6|D3Z0D6_MOUSE AP-1 complex subunit sigma-1A (Fragment) OS=	4	6	6	3	4	4	5	1	3	4	6	5	6	5	6	6	4	4	5	1	3	4	6	5	6	5	6	6	2	2	2	0	2	2	3	3	3	2	3	3	21.7	21.7	12.2	21.987	189
D3YY09;Q4FJW2;Q9D6N5;F6T9K1	D3YY09;Q4FJW2;Q9D6N5;F6T9K1	Dr1-associated corepressor	Drap1	>tr|D3YY09|D3YY09_MOUSE Dr1-associated corepressor OS=Mus musculus GN=Drap1 PE=4 SV=1;>tr|Q4FJW2|Q4FJW2_MOUSE Dr1 associated protein 1 (Negative cofactor 2 alpha), isoform CRA_d OS=Mus musculus GN=Drap1 PE=2 SV=1;>sp|Q9D6N5|NC2A_MOUSE Dr1-associated corepr	4	4	4	1	2	3	4	1	1	1	3	3	3	2	2	2	2	3	4	1	1	1	3	3	3	2	2	2	0	1	1	1	1	1	1	1	1	1	1	1	26.4	26.4	4.7	23.161	212
D3YY86;D3YXX1;G5E8Q2;D3YY85;Q8R5C8;Q6PD13;Q8BJZ0;D3YXR0	D3YY86;D3YXX1;G5E8Q2;D3YY85;Q8R5C8;Q6PD13;Q8BJZ0;D3YXR0	Zinc finger MYND domain-containing protein 11	Zmynd11	>tr|D3YY86|D3YY86_MOUSE Zinc finger MYND domain-containing protein 11 OS=Mus musculus GN=Zmynd11 PE=4 SV=1;>tr|D3YXX1|D3YXX1_MOUSE Zinc finger MYND domain-containing protein 11 OS=Mus musculus GN=Zmynd11 PE=4 SV=1;>tr|G5E8Q2|G5E8Q2_MOUSE Zinc finger MYND d	8	1	1	1	0	1	1	0	0	0	1	1	1	0	0	0	0	1	1	0	0	0	1	1	1	0	0	0	0	1	1	0	0	0	1	1	1	0	0	0	2.1	2.1	2.1	72.085	618
D3YYC3;O88974-4;G5E8N3;O88974;O88974-7;O88974-3;O88974-6;O88974-5;O88974-2	D3YYC3;O88974-4;G5E8N3;O88974;O88974-7;O88974-3	Histone-lysine N-methyltransferase SETDB1	Setdb1	>tr|D3YYC3|D3YYC3_MOUSE Histone-lysine N-methyltransferase SETDB1 OS=Mus musculus GN=Setdb1 PE=3 SV=1;>sp|O88974-4|SETB1_MOUSE Isoform 4 of Histone-lysine N-methyltransferase SETDB1 OS=Mus musculus GN=Setdb1;>tr|G5E8N3|G5E8N3_MOUSE Histone-lysine N-methylt	9	4	4	4	2	2	4	0	1	1	3	4	4	1	1	2	2	2	4	0	1	1	3	4	4	1	1	2	2	2	4	0	1	1	3	4	4	1	1	2	3.1	3.1	3.1	144.64	1308
D3YYD0;Q3UZZ4	D3YYD0;Q3UZZ4	Olfactomedin-4	Olfm4	>tr|D3YYD0|D3YYD0_MOUSE Olfactomedin-4 OS=Mus musculus GN=Olfm4 PE=4 SV=1;>sp|Q3UZZ4|OLFM4_MOUSE Olfactomedin-4 OS=Mus musculus GN=Olfm4 PE=2 SV=1	2	8	8	8	4	4	3	5	4	4	4	4	3	5	8	5	4	4	3	5	4	4	4	4	3	5	8	5	4	4	3	5	4	4	4	4	3	5	8	5	20.1	20.1	20.1	60.967	538
D3YYJ7;Q8R1M8	D3YYJ7		Gm11062	>tr|D3YYJ7|D3YYJ7_MOUSE MCG120048 OS=Mus musculus GN=Gm11062 PE=4 SV=1	2	4	4	4	3	4	3	1	1	1	2	3	2	1	2	1	3	4	3	1	1	1	2	3	2	1	2	1	3	4	3	1	1	1	2	3	2	1	2	1	27.4	27.4	27.4	24.549	219
D3YYT1;Q922P9	D3YYT1;Q922P9	Putative oxidoreductase GLYR1	Glyr1	>tr|D3YYT1|D3YYT1_MOUSE Putative oxidoreductase GLYR1 OS=Mus musculus GN=Glyr1 PE=4 SV=1;>sp|Q922P9|GLYR1_MOUSE Putative oxidoreductase GLYR1 OS=Mus musculus GN=Glyr1 PE=2 SV=1	2	8	8	8	4	5	6	3	3	3	7	4	7	4	3	4	4	5	6	3	3	3	7	4	7	4	3	4	4	5	6	3	3	3	7	4	7	4	3	4	17.6	17.6	17.6	60.435	552
D3YYT8;Q3UW66;Q99J99	D3YYT8;Q3UW66;Q99J99	Sulfurtransferase;3-mercaptopyruvate sulfurtransferase	Mpst	>tr|D3YYT8|D3YYT8_MOUSE Sulfurtransferase OS=Mus musculus GN=Mpst PE=4 SV=1;>tr|Q3UW66|Q3UW66_MOUSE Sulfurtransferase OS=Mus musculus GN=Mpst PE=2 SV=1;>sp|Q99J99|THTM_MOUSE 3-mercaptopyruvate sulfurtransferase OS=Mus musculus GN=Mpst PE=1 SV=3	3	9	9	9	7	8	9	5	5	4	8	7	9	6	7	6	7	8	9	5	5	4	8	7	9	6	7	6	7	8	9	5	5	4	8	7	9	6	7	6	37.1	37.1	37.1	33.267	299
D3YYY8;F6TAL7	D3YYY8		Arhgef26	>tr|D3YYY8|D3YYY8_MOUSE Protein Arhgef26 OS=Mus musculus GN=Arhgef26 PE=4 SV=1	2	3	3	3	1	2	0	1	1	1	1	3	2	1	1	1	1	2	0	1	1	1	1	3	2	1	1	1	1	2	0	1	1	1	1	3	2	1	1	1	4.6	4.6	4.6	97.387	869
D3YZC8;Q8R3B7;Q8R3B7-2;D3YZC7	D3YZC8;Q8R3B7;Q8R3B7-2;D3YZC7	Bromodomain-containing protein 8	Brd8	>tr|D3YZC8|D3YZC8_MOUSE Bromodomain-containing protein 8 OS=Mus musculus GN=Brd8 PE=4 SV=1;>sp|Q8R3B7|BRD8_MOUSE Bromodomain-containing protein 8 OS=Mus musculus GN=Brd8 PE=1 SV=2;>sp|Q8R3B7-2|BRD8_MOUSE Isoform 2 of Bromodomain-containing protein 8 OS=Mus	4	3	3	3	0	2	3	1	1	1	1	1	1	0	0	1	0	2	3	1	1	1	1	1	1	0	0	1	0	2	3	1	1	1	1	1	1	0	0	1	5.8	5.8	5.8	102.87	954
D3YZD8;D3Z442;D3YWY5;Q8R0P4;D3YX09	D3YZD8;D3Z442;D3YWY5;Q8R0P4	UPF0366 protein C11orf67 homolog	1810020D17Rik	>tr|D3YZD8|D3YZD8_MOUSE RIKEN cDNA 1810020D17, isoform CRA_c OS=Mus musculus GN=1810020D17Rik PE=4 SV=1;>tr|D3Z442|D3Z442_MOUSE Uncharacterized protein OS=Mus musculus GN=1810020D17Rik PE=4 SV=1;>tr|D3YWY5|D3YWY5_MOUSE Uncharacterized protein (Fragment) OS	5	3	3	3	0	1	2	0	0	0	2	1	1	0	0	0	0	1	2	0	0	0	2	1	1	0	0	0	0	1	2	0	0	0	2	1	1	0	0	0	36.7	36.7	36.7	16.358	150
D3YZN8;D3YVI2	D3YZN8;D3YVI2		Unc45a	>tr|D3YZN8|D3YZN8_MOUSE Protein unc-45 homolog A (Fragment) OS=Mus musculus GN=Unc45a PE=4 SV=1;>tr|D3YVI2|D3YVI2_MOUSE Protein unc-45 homolog A (Fragment) OS=Mus musculus GN=Unc45a PE=4 SV=1	2	2	1	1	2	2	2	1	1	1	1	1	1	2	2	2	1	1	1	1	1	1	1	1	1	1	1	1	1	1	1	1	1	1	1	1	1	1	1	1	12.6	5.7	5.7	19.446	175
D3YZP9;F6SXB0;F7B4D5	D3YZP9	Coiled-coil domain-containing protein 6	Ccdc6	>sp|D3YZP9|CCDC6_MOUSE Coiled-coil domain-containing protein 6 OS=Mus musculus GN=Ccdc6 PE=3 SV=1	3	17	17	17	10	15	15	7	4	7	13	12	14	4	7	6	10	15	15	7	4	7	13	12	14	4	7	6	10	15	15	7	4	7	13	12	14	4	7	6	55.7	55.7	55.7	52.938	469
D3YZZ5;E9Q7G1	D3YZZ5;E9Q7G1		Tmed7	>tr|D3YZZ5|D3YZZ5_MOUSE Protein Tmed7 OS=Mus musculus GN=Tmed7 PE=3 SV=1;>tr|E9Q7G1|E9Q7G1_MOUSE Protein Tmed7 OS=Mus musculus GN=Tmed7 PE=3 SV=1	2	8	8	8	4	4	4	7	7	6	5	3	6	7	6	6	4	4	4	7	7	6	5	3	6	7	6	6	4	4	4	7	7	6	5	3	6	7	6	6	37.1	37.1	37.1	25.2	224
D3Z024;Q6EDY6;Q6EDY6-3;D3Z030;E9PU95;F7AI27;Q6EDY6-2;E9Q4H6;E9Q3Z9	D3Z024;Q6EDY6;Q6EDY6-3;D3Z030;E9PU95;F7AI27	Leucine-rich repeat-containing protein 16A	Lrrc16a	>tr|D3Z024|D3Z024_MOUSE Leucine-rich repeat-containing protein 16A OS=Mus musculus GN=Lrrc16a PE=4 SV=2;>sp|Q6EDY6|LR16A_MOUSE Leucine-rich repeat-containing protein 16A OS=Mus musculus GN=Lrrc16a PE=1 SV=2;>sp|Q6EDY6-3|LR16A_MOUSE Isoform 3 of Leucine-ric	9	37	37	37	24	25	29	15	16	19	24	29	30	21	16	17	24	25	29	15	16	19	24	29	30	21	16	17	24	25	29	15	16	19	24	29	30	21	16	17	37.7	37.7	37.7	151.91	1374
D3Z041;P41216;D3Z457;D3YVF6;F6WNZ2;F6WYN6	D3Z041;P41216	Long-chain-fatty-acid--CoA ligase 1	Acsl1	>tr|D3Z041|D3Z041_MOUSE Long-chain-fatty-acid--CoA ligase 1 OS=Mus musculus GN=Acsl1 PE=4 SV=1;>sp|P41216|ACSL1_MOUSE Long-chain-fatty-acid--CoA ligase 1 OS=Mus musculus GN=Acsl1 PE=1 SV=2	6	37	34	33	27	28	29	27	25	27	32	31	34	32	32	32	24	25	26	24	22	24	29	28	31	29	29	29	23	24	25	23	21	23	28	27	30	28	28	28	60.9	58.2	57.2	78.034	699
D3Z0A2	D3Z0A2		Prmt1	>tr|D3Z0A2|D3Z0A2_MOUSE Protein arginine N-methyltransferase 1 OS=Mus musculus GN=Prmt1 PE=4 SV=1	1	17	1	1	14	12	12	11	11	13	12	13	13	12	14	14	0	0	0	1	1	1	0	0	0	0	1	1	0	0	0	1	1	1	0	0	0	0	1	1	60.4	4.7	4.7	36.567	318
D3Z0L8;D3Z761	D3Z0L8;D3Z761		Actn4	>tr|D3Z0L8|D3Z0L8_MOUSE Alpha-actinin-4 (Fragment) OS=Mus musculus GN=Actn4 PE=4 SV=1;>tr|D3Z761|D3Z761_MOUSE Alpha-actinin-4 (Fragment) OS=Mus musculus GN=Actn4 PE=4 SV=1	2	15	1	1	11	12	13	11	9	10	13	13	14	13	13	13	0	0	0	0	0	0	1	1	1	0	0	0	0	0	0	0	0	0	1	1	1	0	0	0	78.2	8.7	8.7	23.309	206
D3Z0M9	D3Z0M9		Ddx23	>tr|D3Z0M9|D3Z0M9_MOUSE MCG18410, isoform CRA_a OS=Mus musculus GN=Ddx23 PE=3 SV=1	1	17	17	17	13	9	12	4	4	2	14	14	12	4	4	4	13	9	12	4	4	2	14	14	12	4	4	4	13	9	12	4	4	2	14	14	12	4	4	4	24.7	24.7	24.7	95.493	819
D3Z0P5;Q91YD4;Q5KTC0;REV__Q8R164;REV__E9PXG8	D3Z0P5		Trpm4	>tr|D3Z0P5|D3Z0P5_MOUSE Transient receptor potential cation channel subfamily M member 4 OS=Mus musculus GN=Trpm4 PE=4 SV=1	5	29	1	1	18	20	21	23	19	22	19	20	20	28	27	27	1	1	1	1	0	1	1	1	1	1	1	1	1	1	1	1	0	1	1	1	1	1	1	1	40.7	3.8	3.8	105.52	945
D3Z0X5;Q6PDH0-2;D3Z4N0;Q6PDH0;E9PWB1;F6RUK9;F6RYD0;E9PWW4;E9Q307;F7AWU3;F7B296	D3Z0X5;Q6PDH0-2;D3Z4N0;Q6PDH0;E9PWB1;F6RUK9;F6RYD0;E9PWW4;E9Q307	Pleckstrin homology-like domain family B member 1	Phldb1	>tr|D3Z0X5|D3Z0X5_MOUSE Pleckstrin homology-like domain family B member 1 OS=Mus musculus GN=Phldb1 PE=4 SV=1;>sp|Q6PDH0-2|PHLB1_MOUSE Isoform 2 of Pleckstrin homology-like domain family B member 1 OS=Mus musculus GN=Phldb1;>tr|D3Z4N0|D3Z4N0_MOUSE Pleckstr	11	4	4	4	1	2	1	0	1	0	0	2	1	0	0	0	1	2	1	0	1	0	0	2	1	0	0	0	1	2	1	0	1	0	0	2	1	0	0	0	4.2	4.2	4.2	158.69	1449
D3Z183;Q8CBH5-2;Q8CBH5;F6U3S2	D3Z183;Q8CBH5-2;Q8CBH5	Major facilitator superfamily domain-containing protein 6	Mfsd6	>tr|D3Z183|D3Z183_MOUSE Major facilitator superfamily domain-containing protein 6 OS=Mus musculus GN=Mfsd6 PE=4 SV=1;>sp|Q8CBH5-2|MFSD6_MOUSE Isoform 2 of Major facilitator superfamily domain-containing protein 6 OS=Mus musculus GN=Mfsd6;>sp|Q8CBH5|MFSD6_M	4	9	9	9	1	3	3	8	6	6	1	1	2	5	5	7	1	3	3	8	6	6	1	1	2	5	5	7	1	3	3	8	6	6	1	1	2	5	5	7	20.3	20.3	20.3	87.827	794
D3Z1T2	D3Z1T2		2310009B15Rik	>tr|D3Z1T2|D3Z1T2_MOUSE MCG15614 OS=Mus musculus GN=2310009B15Rik PE=4 SV=1	1	2	2	2	2	2	2	0	0	0	1	1	1	0	0	0	2	2	2	0	0	0	1	1	1	0	0	0	2	2	2	0	0	0	1	1	1	0	0	0	16.9	16.9	16.9	14.656	136
D3Z1V4;P70296;Q5EBQ2;D6RHS6	D3Z1V4;P70296;Q5EBQ2;D6RHS6	Phosphatidylethanolamine-binding protein 1;Hippocampal cholinergic neurostimulating peptide	Pebp1	>tr|D3Z1V4|D3Z1V4_MOUSE Hippocampal cholinergic neurostimulating peptide OS=Mus musculus GN=Pebp1 PE=4 SV=1;>sp|P70296|PEBP1_MOUSE Phosphatidylethanolamine-binding protein 1 OS=Mus musculus GN=Pebp1 PE=1 SV=3;>tr|Q5EBQ2|Q5EBQ2_MOUSE MCG7941, isoform CRA_f	4	8	8	8	5	7	4	3	2	3	6	6	5	3	2	2	5	7	4	3	2	3	6	6	5	3	2	2	5	7	4	3	2	3	6	6	5	3	2	2	46.9	46.9	46.9	23.035	209
D3Z1Y1;Q9DBY1;E9QQ99;E9QNR2;Q9DBY1-2;D3YZH4	D3Z1Y1;Q9DBY1;E9QQ99;E9QNR2;Q9DBY1-2	E3 ubiquitin-protein ligase synoviolin	Syvn1	>tr|D3Z1Y1|D3Z1Y1_MOUSE E3 ubiquitin-protein ligase synoviolin OS=Mus musculus GN=Syvn1 PE=4 SV=1;>sp|Q9DBY1|SYVN1_MOUSE E3 ubiquitin-protein ligase synoviolin OS=Mus musculus GN=Syvn1 PE=1 SV=3;>tr|E9QQ99|E9QQ99_MOUSE E3 ubiquitin-protein ligase synovioli	6	11	11	11	8	6	7	7	5	4	9	8	9	9	10	7	8	6	7	7	5	4	9	8	9	9	10	7	8	6	7	7	5	4	9	8	9	9	10	7	21.4	21.4	21.4	66.943	608
D3Z1Z1;Q3ULF4;D3YXB7;D3YZN4;D3Z342;G3UX97;F6W695;G3UYA9;F6VTG4	D3Z1Z1;Q3ULF4;D3YXB7;D3YZN4	Paraplegin	Spg7	>tr|D3Z1Z1|D3Z1Z1_MOUSE Paraplegin OS=Mus musculus GN=Spg7 PE=3 SV=1;>sp|Q3ULF4|SPG7_MOUSE Paraplegin OS=Mus musculus GN=Spg7 PE=1 SV=1;>tr|D3YXB7|D3YXB7_MOUSE Paraplegin OS=Mus musculus GN=Spg7 PE=4 SV=1;>tr|D3YZN4|D3YZN4_MOUSE Paraplegin OS=Mus musculus	9	20	20	20	7	6	8	6	4	8	13	11	9	8	12	11	7	6	8	6	4	8	13	11	9	8	12	11	7	6	8	6	4	8	13	11	9	8	12	11	32.3	32.3	32.3	86.007	781
D3Z230;D3YUL8;D3YUD3;E9Q9A0;D3YTM1;Q3UEQ1;E9QAD0;Q9EPW0;Q9EPW0-2	D3Z230;D3YUL8;D3YUD3;E9Q9A0;D3YTM1;Q3UEQ1;E9QAD0;Q9EPW0;Q9EPW0-2	Type I inositol-3,4-bisphosphate 4-phosphatase	Inpp4a	>tr|D3Z230|D3Z230_MOUSE Type I inositol 3,4-bisphosphate 4-phosphatase OS=Mus musculus GN=Inpp4a PE=4 SV=1;>tr|D3YUL8|D3YUL8_MOUSE Type I inositol 3,4-bisphosphate 4-phosphatase OS=Mus musculus GN=Inpp4a PE=4 SV=1;>tr|D3YUD3|D3YUD3_MOUSE Type I inositol 3,	9	2	2	2	1	0	1	1	0	0	1	2	0	1	1	1	1	0	1	1	0	0	1	2	0	1	1	1	1	0	1	1	0	0	1	2	0	1	1	1	2.3	2.3	2.3	109.66	977
D3Z285	D3Z285		Nfu1	>tr|D3Z285|D3Z285_MOUSE NFU1 iron-sulfur cluster scaffold homolog, mitochondrial (Fragment) OS=Mus musculus GN=Nfu1 PE=4 SV=1	1	5	1	1	4	2	5	3	2	2	3	4	3	1	1	1	0	0	1	1	1	1	0	1	0	0	1	1	0	0	1	1	1	1	0	1	0	0	1	1	31.2	7.5	7.5	22.028	199
D3Z286	D3Z286		Glb1	>tr|D3Z286|D3Z286_MOUSE Protein Tmppe OS=Mus musculus GN=Glb1 PE=4 SV=2	1	5	5	5	2	3	2	1	2	2	3	2	2	4	3	3	2	3	2	1	2	2	3	2	2	4	3	3	2	3	2	1	2	2	3	2	2	4	3	3	19.9	19.9	19.9	49.401	447
D3Z2E9;Q9D882;D3YYX8;D3Z7G3;F8WHN9	D3Z2E9;Q9D882;D3YYX8;D3Z7G3;F8WHN9	Uncharacterized protein C10orf35 homolog	2010107G23Rik	>tr|D3Z2E9|D3Z2E9_MOUSE Uncharacterized protein (Fragment) OS=Mus musculus GN=2010107G23Rik PE=4 SV=1;>sp|Q9D882|CJ035_MOUSE Uncharacterized protein C10orf35 homolog OS=Mus musculus PE=2 SV=1;>tr|D3YYX8|D3YYX8_MOUSE Uncharacterized protein (Fragment) OS=Mu	5	4	4	4	4	4	4	3	3	3	4	3	4	4	4	4	4	4	4	3	3	3	4	3	4	4	4	4	4	4	4	3	3	3	4	3	4	4	4	4	40.7	40.7	40.7	13.454	123
D3Z2N1;Q8BH83	D3Z2N1;Q8BH83	Ankyrin repeat domain-containing protein 9	Ankrd9	>tr|D3Z2N1|D3Z2N1_MOUSE Ankyrin repeat domain-containing protein 9 OS=Mus musculus GN=Ankrd9 PE=4 SV=1;>sp|Q8BH83|ANKR9_MOUSE Ankyrin repeat domain-containing protein 9 OS=Mus musculus GN=Ankrd9 PE=2 SV=1	2	2	2	2	2	0	2	0	0	0	2	1	2	0	0	0	2	0	2	0	0	0	2	1	2	0	0	0	2	0	2	0	0	0	2	1	2	0	0	0	7	7	7	38.924	359
D3Z2W0;Q9WUU8-3;E9QM75;Q9WUU8;Q9WUU8-2;Q3UXR9;D3Z3B6	D3Z2W0;Q9WUU8-3;E9QM75;Q9WUU8;Q9WUU8-2;Q3UXR9	TNFAIP3-interacting protein 1	Tnip1	>tr|D3Z2W0|D3Z2W0_MOUSE TNFAIP3-interacting protein 1 OS=Mus musculus GN=Tnip1 PE=4 SV=1;>sp|Q9WUU8-3|TNIP1_MOUSE Isoform 3 of TNFAIP3-interacting protein 1 OS=Mus musculus GN=Tnip1;>tr|E9QM75|E9QM75_MOUSE TNFAIP3-interacting protein 1 OS=Mus musculus GN=T	7	5	5	5	1	3	5	2	1	1	0	2	2	2	2	2	1	3	5	2	1	1	0	2	2	2	2	2	1	3	5	2	1	1	0	2	2	2	2	2	13.3	13.3	13.3	72.938	646
D3Z312;D3Z325;Q921Z5;D3YWJ5;Q921Z5-2;F7ANX4	D3Z312;D3Z325;Q921Z5;D3YWJ5;Q921Z5-2;F7ANX4	Tumor necrosis factor alpha-induced protein 8	Tnfaip8	>tr|D3Z312|D3Z312_MOUSE Tumor necrosis factor alpha-induced protein 8 OS=Mus musculus GN=Tnfaip8 PE=4 SV=1;>tr|D3Z325|D3Z325_MOUSE Tumor necrosis factor alpha-induced protein 8 OS=Mus musculus GN=Tnfaip8 PE=4 SV=1;>sp|Q921Z5|TFIP8_MOUSE Tumor necrosis fact	6	2	2	2	1	1	1	1	0	1	1	1	2	1	1	0	1	1	1	1	0	1	1	1	2	1	1	0	1	1	1	1	0	1	1	1	2	1	1	0	10.8	10.8	10.8	24.347	212
D3Z357;Q6P2L6;D3Z197;Q6P2L6-2;Q6P2L6-4	D3Z357;Q6P2L6;D3Z197;Q6P2L6-2;Q6P2L6-4	Histone-lysine N-methyltransferase NSD3	Whsc1l1	>tr|D3Z357|D3Z357_MOUSE Histone-lysine N-methyltransferase NSD3 OS=Mus musculus GN=Whsc1l1 PE=4 SV=1;>sp|Q6P2L6|NSD3_MOUSE Histone-lysine N-methyltransferase NSD3 OS=Mus musculus GN=Whsc1l1 PE=1 SV=2;>tr|D3Z197|D3Z197_MOUSE Histone-lysine N-methyltransfera	5	5	5	4	4	3	2	2	1	1	4	4	4	1	1	1	4	3	2	2	1	1	4	4	4	1	1	1	3	2	2	1	0	0	3	3	3	0	0	0	5	5	4.4	161.65	1446
D3Z393;D3YX48	D3Z393;D3YX48		2510049J12Rik	>tr|D3Z393|D3Z393_MOUSE MCG132465, isoform CRA_a OS=Mus musculus GN=2510049J12Rik PE=4 SV=1;>tr|D3YX48|D3YX48_MOUSE MCG132465, isoform CRA_b OS=Mus musculus GN=2510049J12Rik PE=4 SV=2	2	3	3	3	1	1	1	1	1	2	1	1	1	2	1	2	1	1	1	1	1	2	1	1	1	2	1	2	1	1	1	1	1	2	1	1	1	2	1	2	19.4	19.4	19.4	24.777	217
D3Z3N4;D3YWT1	D3Z3N4;D3YWT1		Hnrnph3	>tr|D3Z3N4|D3Z3N4_MOUSE MCG11326, isoform CRA_a OS=Mus musculus GN=Hnrnph3 PE=4 SV=1;>tr|D3YWT1|D3YWT1_MOUSE MCG11326, isoform CRA_b OS=Mus musculus GN=Hnrnph3 PE=4 SV=1	2	4	4	4	3	3	4	0	0	1	4	3	3	0	0	0	3	3	4	0	0	1	4	3	3	0	0	0	3	3	4	0	0	1	4	3	3	0	0	0	17.9	17.9	17.9	36.869	346
D3Z3Y1;D3Z4I0;D3YTQ6	D3Z3Y1;D3Z4I0;D3YTQ6		Pigg	>tr|D3Z3Y1|D3Z3Y1_MOUSE Protein Pigg OS=Mus musculus GN=Pigg PE=4 SV=1;>tr|D3Z4I0|D3Z4I0_MOUSE Protein Pigg OS=Mus musculus GN=Pigg PE=4 SV=1;>tr|D3YTQ6|D3YTQ6_MOUSE Protein Pigg OS=Mus musculus GN=Pigg PE=4 SV=1	3	16	15	15	7	5	10	10	11	9	12	9	11	12	11	8	7	5	9	10	11	9	11	9	10	12	11	8	7	5	9	10	11	9	11	9	10	12	11	8	20.9	19.8	19.8	108.51	983
D3Z3Z9;F7ABS0;Q9WUZ7;E9Q2Q9;F6QLU8;F7CKA6	D3Z3Z9;F7ABS0;Q9WUZ7;E9Q2Q9;F6QLU8;F7CKA6	SH3 domain-binding glutamic acid-rich protein	Sh3bgr	>tr|D3Z3Z9|D3Z3Z9_MOUSE SH3 domain-binding glutamic acid-rich protein (Fragment) OS=Mus musculus GN=Sh3bgr PE=4 SV=1;>tr|F7ABS0|F7ABS0_MOUSE SH3 domain-binding glutamic acid-rich protein OS=Mus musculus GN=Sh3bgr PE=4 SV=1;>sp|Q9WUZ7|SH3BG_MOUSE SH3 domain	6	2	2	2	1	2	2	1	0	1	1	2	1	0	1	1	1	2	2	1	0	1	1	2	1	0	1	1	1	2	2	1	0	1	1	2	1	0	1	1	13.3	13.3	13.3	19.781	180
D3Z4C0	D3Z4C0		Farp2	>tr|D3Z4C0|D3Z4C0_MOUSE FERM, RhoGEF and pleckstrin domain-containing protein 2 OS=Mus musculus GN=Farp2 PE=4 SV=1	1	18	3	3	11	13	13	15	13	11	10	10	13	12	15	15	2	2	2	2	1	1	2	2	2	2	2	2	2	2	2	2	1	1	2	2	2	2	2	2	31.4	5	5	87.861	795
D3Z4E5;Q9WUB4;D3Z6H3;F6XWI6	D3Z4E5;Q9WUB4;D3Z6H3;F6XWI6	Dynactin subunit 6	Dctn6	>tr|D3Z4E5|D3Z4E5_MOUSE Dynactin subunit 6 OS=Mus musculus GN=Dctn6 PE=4 SV=1;>sp|Q9WUB4|DCTN6_MOUSE Dynactin subunit 6 OS=Mus musculus GN=Dctn6 PE=1 SV=1;>tr|D3Z6H3|D3Z6H3_MOUSE Dynactin 6, isoform CRA_b OS=Mus musculus GN=Dctn6 PE=4 SV=1;>tr|F6XWI6|F6XWI	4	1	1	1	1	1	1	1	0	1	0	0	1	0	0	1	1	1	1	1	0	1	0	0	1	0	0	1	1	1	1	1	0	1	0	0	1	0	0	1	5.1	5.1	5.1	21.488	195
D3Z4J3;Q99104;D3YZ62;B8JK05	D3Z4J3;Q99104;D3YZ62	Unconventional myosin-Va	Myo5a	>tr|D3Z4J3|D3Z4J3_MOUSE Unconventional myosin-Va OS=Mus musculus GN=Myo5a PE=4 SV=1;>sp|Q99104|MYO5A_MOUSE Unconventional myosin-Va OS=Mus musculus GN=Myo5a PE=1 SV=2;>tr|D3YZ62|D3YZ62_MOUSE Unconventional myosin-Va OS=Mus musculus GN=Myo5a PE=4 SV=1	4	12	6	6	4	9	9	6	5	3	9	8	9	10	7	6	2	4	4	3	3	1	4	3	4	4	3	4	2	4	4	3	3	1	4	3	4	4	3	4	7.1	3.6	3.6	215.52	1855
D3Z4L9;Q61333;B2RQW1	D3Z4L9;Q61333;B2RQW1	Tumor necrosis factor alpha-induced protein 2	Tnfaip2	>tr|D3Z4L9|D3Z4L9_MOUSE Tumor necrosis factor alpha-induced protein 2 OS=Mus musculus GN=Tnfaip2 PE=4 SV=2;>sp|Q61333|TNAP2_MOUSE Tumor necrosis factor alpha-induced protein 2 OS=Mus musculus GN=Tnfaip2 PE=2 SV=2;>tr|B2RQW1|B2RQW1_MOUSE Tumor necrosis fact	3	4	4	4	0	1	0	0	1	0	2	1	2	1	1	0	0	1	0	0	1	0	2	1	2	1	1	0	0	1	0	0	1	0	2	1	2	1	1	0	6.8	6.8	6.8	79.933	708
D3Z4M4;Q8C310-3;E9QN68;Q8C310;Q8C310-2;Q6IR38	D3Z4M4;Q8C310-3;E9QN68;Q8C310;Q8C310-2;Q6IR38	Roundabout homolog 4	Robo4	>tr|D3Z4M4|D3Z4M4_MOUSE Roundabout homolog 4 OS=Mus musculus GN=Robo4 PE=4 SV=1;>sp|Q8C310-3|ROBO4_MOUSE Isoform 3 of Roundabout homolog 4 OS=Mus musculus GN=Robo4;>tr|E9QN68|E9QN68_MOUSE Roundabout homolog 4 OS=Mus musculus GN=Robo4 PE=4 SV=1;>sp|Q8C310|R	6	2	2	2	0	0	0	2	1	1	1	0	1	1	1	1	0	0	0	2	1	1	1	0	1	1	1	1	0	0	0	2	1	1	1	0	1	1	1	1	1.9	1.9	1.9	114.87	1074
D3Z4P2;P59481;F6QN75	D3Z4P2;P59481;F6QN75	VIP36-like protein	Lman2l	>tr|D3Z4P2|D3Z4P2_MOUSE Lectin, mannose-binding 2-like, isoform CRA_b OS=Mus musculus GN=Lman2l PE=4 SV=1;>sp|P59481|LMA2L_MOUSE VIP36-like protein OS=Mus musculus GN=Lman2l PE=2 SV=1;>tr|F6QN75|F6QN75_MOUSE VIP36-like protein (Fragment) OS=Mus musculus GN	3	5	5	5	3	4	3	2	3	4	4	3	4	5	4	4	3	4	3	2	3	4	4	3	4	5	4	4	3	4	3	2	3	4	4	3	4	5	4	4	15.4	15.4	15.4	41.152	358
D3Z4R1;F6XQ35;Q8CA92	D3Z4R1		Hfm1	>tr|D3Z4R1|D3Z4R1_MOUSE Protein Hfm1 OS=Mus musculus GN=Hfm1 PE=4 SV=2	3	3	3	3	1	1	2	2	0	1	3	3	3	1	1	2	1	1	2	2	0	1	3	3	3	1	1	2	1	1	2	2	0	1	3	3	3	1	1	2	3	3	3	161.38	1434
D3Z4T9;B2RRT9;D3Z4U0;Q9R020;E9PUD0;Q9R020-2	D3Z4T9;B2RRT9;D3Z4U0;Q9R020;E9PUD0;Q9R020-2	Zinc finger Ran-binding domain-containing protein 2	Zranb2	>tr|D3Z4T9|D3Z4T9_MOUSE Zinc finger Ran-binding domain-containing protein 2 OS=Mus musculus GN=Zranb2 PE=4 SV=1;>tr|B2RRT9|B2RRT9_MOUSE Zinc finger, RAN-binding domain containing 2 OS=Mus musculus GN=Zranb2 PE=2 SV=1;>tr|D3Z4U0|D3Z4U0_MOUSE Zinc finger Ran	6	8	8	8	7	6	7	4	3	3	7	8	7	2	4	4	7	6	7	4	3	3	7	8	7	2	4	4	7	6	7	4	3	3	7	8	7	2	4	4	23.2	23.2	23.2	38.363	340
D3Z4U5;G3UYZ9;Q8BVL9;D3Z555	D3Z4U5;G3UYZ9;Q8BVL9	Janus kinase and microtubule-interacting protein 1	Jakmip1	>tr|D3Z4U5|D3Z4U5_MOUSE Janus kinase and microtubule-interacting protein 1 OS=Mus musculus GN=Jakmip1 PE=4 SV=1;>tr|G3UYZ9|G3UYZ9_MOUSE Janus kinase and microtubule-interacting protein 1 OS=Mus musculus GN=Jakmip1 PE=4 SV=1;>sp|Q8BVL9|JKIP1_MOUSE Janus kin	4	3	3	3	2	2	2	1	1	1	2	1	3	1	1	0	2	2	2	1	1	1	2	1	3	1	1	0	2	2	2	1	1	1	2	1	3	1	1	0	4.1	4.1	4.1	97.234	831
D3Z4V2;D3Z3F1;Q9D824;Q9D824-2;Q9D824-3;D3Z619;Q9D824-4	D3Z4V2;D3Z3F1;Q9D824;Q9D824-2;Q9D824-3;D3Z619;Q9D824-4	Pre-mRNA 3-end-processing factor FIP1	Fip1l1	>tr|D3Z4V2|D3Z4V2_MOUSE Pre-mRNA 3-end-processing factor FIP1 OS=Mus musculus GN=Fip1l1 PE=4 SV=1;>tr|D3Z3F1|D3Z3F1_MOUSE Pre-mRNA 3-end-processing factor FIP1 OS=Mus musculus GN=Fip1l1 PE=4 SV=1;>sp|Q9D824|FIP1_MOUSE Pre-mRNA 3-end-processing factor FI	7	6	6	6	5	5	6	0	1	0	5	4	6	1	0	0	5	5	6	0	1	0	5	4	6	1	0	0	5	5	6	0	1	0	5	4	6	1	0	0	13.3	13.3	13.3	66.64	595
D3Z534;A2CG49-4;D3Z4R2;D3Z535;D3Z532;A2CG49-6;E9QN03;A2CG49-7;H7BX42;E9QN83;F6QYT9	D3Z534;A2CG49-4;D3Z4R2;D3Z535;D3Z532;A2CG49-6;E9QN03;A2CG49-7;H7BX42;E9QN83;F6QYT9		Kalrn	>tr|D3Z534|D3Z534_MOUSE Kalirin OS=Mus musculus GN=Kalrn PE=4 SV=1;>sp|A2CG49-4|KALRN_MOUSE Isoform 4 of Kalirin OS=Mus musculus GN=Kalrn;>tr|D3Z4R2|D3Z4R2_MOUSE Kalirin OS=Mus musculus GN=Kalrn PE=4 SV=1;>tr|D3Z535|D3Z535_MOUSE Kalirin OS=Mus musculus GN=	11	13	13	2	5	5	7	10	6	12	5	5	6	6	9	10	5	5	7	10	6	12	5	5	6	6	9	10	0	0	2	2	1	2	1	2	1	0	2	2	28	28	4.9	75.844	674
D3Z547;E9PV48;Q5FW82;Q64345	D3Z547;E9PV48;Q5FW82;Q64345	Interferon-induced protein with tetratricopeptide repeats 3	I830012O16Rik;Ifit3	>tr|D3Z547|D3Z547_MOUSE Uncharacterized protein OS=Mus musculus GN=I830012O16Rik PE=4 SV=2;>tr|E9PV48|E9PV48_MOUSE Uncharacterized protein OS=Mus musculus GN=I830012O16Rik PE=4 SV=1;>tr|Q5FW82|Q5FW82_MOUSE Interferon-induced protein with tetratricopeptide	4	4	3	3	1	4	4	3	3	2	1	1	2	0	1	0	1	3	3	2	2	2	1	1	1	0	0	0	1	3	3	2	2	2	1	1	1	0	0	0	10.4	8.3	8.3	50.241	432
D3Z576;Q8VHX6;D3YW87;Q8VHX6-2	D3Z576;Q8VHX6;D3YW87;Q8VHX6-2	Filamin-C	Flnc	>tr|D3Z576|D3Z576_MOUSE Filamin-C OS=Mus musculus GN=Flnc PE=4 SV=1;>sp|Q8VHX6|FLNC_MOUSE Filamin-C OS=Mus musculus GN=Flnc PE=1 SV=3;>tr|D3YW87|D3YW87_MOUSE Filamin-C OS=Mus musculus GN=Flnc PE=4 SV=1;>sp|Q8VHX6-2|FLNC_MOUSE Isoform 2 of Filamin-C OS=Mus	4	13	3	3	10	12	10	7	7	9	12	12	11	9	9	10	2	3	2	0	0	1	3	2	2	0	0	0	2	3	2	0	0	1	3	2	2	0	0	0	5.4	1.8	1.8	292.34	2737
D3Z577;P01898;A7VMS3;H3BK58;H3BJA9;G3UY84;E9PV42	D3Z577;P01898	H-2 class I histocompatibility antigen, Q10 alpha chain	H2-Q10	>tr|D3Z577|D3Z577_MOUSE H-2 class I histocompatibility antigen, Q10 alpha chain OS=Mus musculus GN=H2-Q10 PE=3 SV=2;>sp|P01898|HA10_MOUSE H-2 class I histocompatibility antigen, Q10 alpha chain OS=Mus musculus GN=H2-Q10 PE=1 SV=3	7	7	1	0	6	6	6	6	6	6	5	5	4	5	6	6	0	0	0	0	0	0	0	0	0	1	0	0	0	0	0	0	0	0	0	0	0	0	0	0	19.2	2.3	0	40.218	354
D3Z5F7;D3YUB9;P70345;P70345-2	D3Z5F7;D3YUB9		Gm20521;Pabpn1	>tr|D3Z5F7|D3Z5F7_MOUSE Uncharacterized protein OS=Mus musculus GN=Gm20521 PE=4 SV=1;>tr|D3YUB9|D3YUB9_MOUSE Polyadenylate-binding protein 2 (Fragment) OS=Mus musculus GN=Pabpn1 PE=4 SV=2	4	7	7	2	2	4	3	1	1	2	3	3	4	3	3	4	2	4	3	1	1	2	3	3	4	3	3	4	0	0	0	0	0	0	1	0	1	0	1	1	28.2	28.2	9.3	37.244	333
D3Z5I1;Q3UPF5;Q3UPF5-2;G3X9X5	D3Z5I1;Q3UPF5;Q3UPF5-2;G3X9X5	Zinc finger CCCH-type antiviral protein 1	Zc3hav1	>tr|D3Z5I1|D3Z5I1_MOUSE Zinc finger CCCH-type antiviral protein 1 OS=Mus musculus GN=Zc3hav1 PE=4 SV=1;>sp|Q3UPF5|ZCCHV_MOUSE Zinc finger CCCH-type antiviral protein 1 OS=Mus musculus GN=Zc3hav1 PE=1 SV=1;>sp|Q3UPF5-2|ZCCHV_MOUSE Isoform 2 of Zinc finger C	4	26	26	26	14	14	17	8	7	11	21	18	21	9	10	12	14	14	17	8	7	11	21	18	21	9	10	12	14	14	17	8	7	11	21	18	21	9	10	12	31.2	31.2	31.2	112.53	996
D3Z5L6;E9PU92;D6RGT8	D3Z5L6;E9PU92;D6RGT8	MFS-type transporter C6orf192 homolog	1110021L09Rik	>sp|D3Z5L6|S18B1_MOUSE MFS-type transporter SLC18B1 OS=Mus musculus GN=Slc18b1 PE=2 SV=2;>tr|E9PU92|E9PU92_MOUSE Uncharacterized protein OS=Mus musculus GN=1110021L09Rik PE=4 SV=1;>tr|D6RGT8|D6RGT8_MOUSE Uncharacterized protein OS=Mus musculus GN=1110021L0	3	2	2	2	2	2	2	2	2	2	2	2	2	2	2	2	2	2	2	2	2	2	2	2	2	2	2	2	2	2	2	2	2	2	2	2	2	2	2	2	9.2	9.2	9.2	49.008	459
D3Z5N4;Q3TWR9;Q9R062	D3Z5N4;Q3TWR9;Q9R062	Glycogenin-1	Gyg;Gyg1	>tr|D3Z5N4|D3Z5N4_MOUSE Protein Gyg OS=Mus musculus GN=Gyg PE=4 SV=1;>tr|Q3TWR9|Q3TWR9_MOUSE Glycogenin, isoform CRA_a OS=Mus musculus GN=Gyg PE=2 SV=1;>sp|Q9R062|GLYG_MOUSE Glycogenin-1 OS=Mus musculus GN=Gyg1 PE=2 SV=3	3	2	2	2	1	2	2	1	0	1	1	2	1	0	1	0	1	2	2	1	0	1	1	2	1	0	1	0	1	2	2	1	0	1	1	2	1	0	1	0	10.3	10.3	10.3	39.307	350
D3Z5N6;Q61103;F8WIP7	D3Z5N6;Q61103;F8WIP7	Zinc finger protein ubi-d4	Dpf2	>tr|D3Z5N6|D3Z5N6_MOUSE Zinc finger protein ubi-d4 OS=Mus musculus GN=Dpf2 PE=4 SV=1;>sp|Q61103|REQU_MOUSE Zinc finger protein ubi-d4 OS=Mus musculus GN=Dpf2 PE=1 SV=1;>tr|F8WIP7|F8WIP7_MOUSE Zinc finger protein ubi-d4 (Fragment) OS=Mus musculus GN=Dpf2 PE	3	8	8	8	2	5	4	1	0	0	6	6	6	2	2	2	2	5	4	1	0	0	6	6	6	2	2	2	2	5	4	1	0	0	6	6	6	2	2	2	36.3	36.3	36.3	45.854	405
D3Z5N8;Q6KAU7-3;E9QKB6;G5E8T4;Q6KAU7;Q6KAU7-2	D3Z5N8;Q6KAU7-3;E9QKB6;G5E8T4;Q6KAU7;Q6KAU7-2	Pleckstrin homology domain-containing family G member 2	Plekhg2	>tr|D3Z5N8|D3Z5N8_MOUSE Pleckstrin homology domain-containing family G member 2 OS=Mus musculus GN=Plekhg2 PE=4 SV=1;>sp|Q6KAU7-3|PKHG2_MOUSE Isoform 3 of Pleckstrin homology domain-containing family G member 2 OS=Mus musculus GN=Plekhg2;>tr|E9QKB6|E9QKB6_	6	1	1	1	1	0	0	0	0	0	0	0	1	0	0	0	1	0	0	0	0	0	0	0	1	0	0	0	1	0	0	0	0	0	0	0	1	0	0	0	1.2	1.2	1.2	146.04	1365
D3Z637;D3Z2U2	D3Z637;D3Z2U2		Tpd52	>tr|D3Z637|D3Z637_MOUSE MCG10134, isoform CRA_c OS=Mus musculus GN=Tpd52 PE=4 SV=1;>tr|D3Z2U2|D3Z2U2_MOUSE Tumor protein D52 (Fragment) OS=Mus musculus GN=Tpd52 PE=4 SV=1	2	8	2	2	7	6	7	7	6	6	7	5	6	6	7	7	1	0	1	1	0	1	1	0	0	0	1	1	1	0	1	1	0	1	1	0	0	0	1	1	52.5	13.6	13.6	17.603	162
D3Z656;Q8CHC4;F7BQW7;E9Q7S0;D3Z1M7;F7CD11;F7BI35;F6XIX0	D3Z656;Q8CHC4;F7BQW7;E9Q7S0	Synaptojanin-1	Synj1	>tr|D3Z656|D3Z656_MOUSE Synaptojanin-1 OS=Mus musculus GN=Synj1 PE=4 SV=1;>sp|Q8CHC4|SYNJ1_MOUSE Synaptojanin-1 OS=Mus musculus GN=Synj1 PE=1 SV=3;>tr|F7BQW7|F7BQW7_MOUSE Synaptojanin-1 (Fragment) OS=Mus musculus GN=Synj1 PE=4 SV=1;>tr|E9Q7S0|E9Q7S0_MOUSE	8	16	16	13	10	11	12	5	4	3	9	10	13	4	3	3	10	11	12	5	4	3	9	10	13	4	3	3	7	10	10	4	3	2	8	9	11	4	3	3	14.8	14.8	11.4	176.33	1607
D3Z687;A2CF78;Q9DCT6;A2CF81;Q9DCT6-2;F6XN97;F6SYB8;F8WH46;F8WH85;A2CF77;Q9DCT6-3;A2CF82;Q9DCT6-4;A2CF83;A2CF80	D3Z687;A2CF78;Q9DCT6;A2CF81;Q9DCT6-2;F6XN97;F6SYB8;F8WH46;F8WH85;A2CF77;Q9DCT6-3;A2CF82;Q9DCT6-4;A2CF83;A2CF80	Chromatin complexes subunit BAP18	0610010K14Rik;Bap18	>tr|D3Z687|D3Z687_MOUSE Uncharacterized protein OS=Mus musculus GN=0610010K14Rik PE=4 SV=2;>tr|A2CF78|A2CF78_MOUSE Novel protein OS=Mus musculus GN=0610010K14Rik PE=4 SV=1;>sp|Q9DCT6|BAP18_MOUSE Chromatin complexes subunit BAP18 OS=Mus musculus GN=Bap18 PE	15	2	2	2	2	2	1	1	0	0	1	1	1	1	0	0	2	2	1	1	0	0	1	1	1	1	0	0	2	2	1	1	0	0	1	1	1	1	0	0	14.7	14.7	14.7	20	191
D3Z689;Q9CRC7;F6TVF6;F6RIV7	D3Z689		Adamtsl5	>tr|D3Z689|D3Z689_MOUSE ADAMTS-like 5, isoform CRA_c OS=Mus musculus GN=Adamtsl5 PE=4 SV=1	4	7	7	7	5	6	5	0	1	0	7	7	7	2	4	3	5	6	5	0	1	0	7	7	7	2	4	3	5	6	5	0	1	0	7	7	7	2	4	3	21.9	21.9	21.9	53.593	485
D3Z6C3;P97351;Q564F3;D3Z7W7	D3Z6C3;P97351;Q564F3;D3Z7W7	40S ribosomal protein S3a	Gm10119;Rps3a;Gm9000	>tr|D3Z6C3|D3Z6C3_MOUSE Uncharacterized protein OS=Mus musculus GN=Gm10119 PE=3 SV=1;>sp|P97351|RS3A_MOUSE 40S ribosomal protein S3a OS=Mus musculus GN=Rps3a PE=1 SV=3;>tr|Q564F3|Q564F3_MOUSE MCG1128, isoform CRA_c OS=Mus musculus GN=Rps3a PE=2 SV=1;>tr|D3	4	27	27	27	22	25	25	16	15	16	24	25	25	20	22	17	22	25	25	16	15	16	24	25	25	20	22	17	22	25	25	16	15	16	24	25	25	20	22	17	76.1	76.1	76.1	29.824	264
D3Z6C9	D3Z6C9		Nagpa	>tr|D3Z6C9|D3Z6C9_MOUSE N-acetylglucosamine-1-phosphodiester alpha-N-acetylglucosaminidase OS=Mus musculus GN=Nagpa PE=4 SV=1	1	11	1	1	4	6	6	9	8	8	5	7	7	9	10	9	0	0	0	1	1	1	0	0	0	0	0	0	0	0	0	1	1	1	0	0	0	0	0	0	39.6	3.7	3.7	40.881	374
D3Z6D5;Q3U049;Q6TYB5;Q3TN06;E9Q755	D3Z6D5;Q3U049;Q6TYB5;Q3TN06;E9Q755	Fasciculation and elongation protein zeta-2	Fez2	>tr|D3Z6D5|D3Z6D5_MOUSE Fasciculation and elongation protein zeta-2 OS=Mus musculus GN=Fez2 PE=4 SV=1;>tr|Q3U049|Q3U049_MOUSE Putative uncharacterized protein OS=Mus musculus GN=Fez2 PE=2 SV=1;>sp|Q6TYB5|FEZ2_MOUSE Fasciculation and elongation protein zeta	5	3	3	3	2	3	3	0	1	0	2	3	3	1	0	0	2	3	3	0	1	0	2	3	3	1	0	0	2	3	3	0	1	0	2	3	3	1	0	0	11.5	11.5	11.5	42.046	375
D3Z6F0;E9PXF7	D3Z6F0;E9PXF7		Gm14446	>tr|D3Z6F0|D3Z6F0_MOUSE Protein Gm14446 OS=Mus musculus GN=Gm14446 PE=4 SV=1;>tr|E9PXF7|E9PXF7_MOUSE Protein Gm14446 OS=Mus musculus GN=Gm14446 PE=4 SV=1	2	8	2	2	7	7	7	5	6	6	6	5	6	6	4	6	1	2	1	1	2	2	1	0	1	1	0	1	1	2	1	1	2	2	1	0	1	1	0	1	16.4	4	4	54.509	470
D3Z6N6;D3YX41	D3Z6N6;D3YX41	40S ribosomal protein S6	Rps6-ps1;Rps6-ps2	>tr|D3Z6N6|D3Z6N6_MOUSE 40S ribosomal protein S6 OS=Mus musculus GN=Rps6-ps1 PE=3 SV=1;>tr|D3YX41|D3YX41_MOUSE 40S ribosomal protein S6 OS=Mus musculus GN=Rps6-ps2 PE=3 SV=2	2	16	1	1	12	14	12	11	8	11	12	15	16	10	12	12	0	0	0	0	0	0	0	1	1	1	1	1	0	0	0	0	0	0	0	1	1	1	1	1	59	6	6	28.566	249
D3Z6P0;D3Z6P0-2;F6S5U2	D3Z6P0;D3Z6P0-2	Protein disulfide-isomerase A2	Pdia2	>sp|D3Z6P0|PDIA2_MOUSE Protein disulfide-isomerase A2 OS=Mus musculus GN=Pdia2 PE=1 SV=1;>sp|D3Z6P0-2|PDIA2_MOUSE Isoform 2 of Protein disulfide-isomerase A2 OS=Mus musculus GN=Pdia2	3	22	22	17	11	16	9	8	9	4	21	17	7	15	10	6	11	16	9	8	9	4	21	17	7	15	10	6	9	12	7	6	7	3	16	13	6	12	6	5	48.6	48.6	38.7	58.316	527
D3Z6Q9	D3Z6Q9	Bridging integrator 2	Bin2	>sp|D3Z6Q9|BIN2_MOUSE Bridging integrator 2 OS=Mus musculus GN=Bin2 PE=3 SV=1	1	4	4	4	1	2	3	1	0	1	3	3	3	1	2	2	1	2	3	1	0	1	3	3	3	1	2	2	1	2	3	1	0	1	3	3	3	1	2	2	14.1	14.1	14.1	52.553	489
[truncated: 6,732 more rows]
[truncated: 50 more columns]
